# Supplementary material for: Whole-transcriptome analyses identify key differentially expressed mRNAs, lncRNAs, and miRNAs associated with male sterility in watermelon
Source: Front Plant Sci. 2023 Mar 2;14:1138415. doi: 10.3389/fpls.2023.1138415 (PMC10019506; doi:10.3389/fpls.2023.1138415)
Supplement: Supplementary file 6 [file Table_1.xlsx]

## Sheet: Table S1
	Table S1 Primers used in qRT-PCR of this study
	Gene_ID	Primer sequence(F:5'-3')	Primer sequence(R:5'-3')
	LNC_002346	CTCTTCATCCACCATAAACGCAGTTACAGGA	CGCGTATGCGACCGAAGTGACGGC
	LNC_016278	TGATGGATAGCAAGAGGGAGAAAGGCCA	ACATAACAAGGGGAGGGAGAGATGTGTTCA
	LNC_026938	GGTTGCTTTTGGCAACTAGCTTGGGG	TGCAACCCAAAGAGCCCACCACCC
	LNC_006204	AGTAGAAACAAAACAACTGCTGGCGATAGATAACA	AGTTGCAGAAAACTTCTTCCATGGTTACTCCA
	LNC_028852	CGGGATTTCACTTACGACAATTTGGGAGTGC	GCATACGATCTATTTGCTTCGGTCCCGT
	LNC_022014	TGGCAATGGAAATCCAACCGGACCA	CCGCCATCCACGTTTCATATTCTGGGT
	LNC_028427	GCACTCTCTTGGGTTTAAAGTTTTAGAGGAGCG	TGGCATTCCTCACCAATTCCCACCACC
	LNC_033125	ACAACCACAGCAGCAGTCGGGCCA	TGTTCTGCTGTAGGTGCCGTGTAGC
	LNC_014975	CCCACTGGTCTTCAACGGGGATCGT	CCGCCAGAGCACCTTAAAGTTGAGAGC
	LNC_010361	GCCCGACCCATGAACCATCGTCT	ACCCTAGTACACCAAGTGTTTGAAGAAATGCC
	miR396a-5p	CGCTTCCACAGCTTTCTTGAACTG	GTGCAGGGTCCGAGGT
	miR396b-5p	CAGCTTCCACAGCTTTCTTGAACTT	GTGCAGGGTCCGAGGT
	miR171a-3p	TGATTGAGCCGCGCCAATATC	GTGCAGGGTCCGAGGT
	miR390a-3p	CGTCAGTCAGGCCCGCTATCC	GTGCAGGGTCCGAGGT
	novel_17	GCTTCCATCTAATGATACCGTAGCAT	GTGCAGGGTCCGAGGT
	novel_24	CCGCTATCCATCCTGAGTTTCC	GTGCAGGGTCCGAGGT
	novel_38	CGTCAGTCAGGCCCGCTATCT	GTGCAGGGTCCGAGGT
	novel_71	CGTTCGCTGTGGCTTTTGTAATA	GTGCAGGGTCCGAGGT
	novel_56	TGTGTTCTCAGGTCGCCCCTA	GTGCAGGGTCCGAGGT
	novel_78	TGCCAAAGGAGAGTTGCCCTA	GTGCAGGGTCCGAGGT
	U6	GGGGACATCCGATAAAATT	TGTGCGTGTCATCCTTGC

## Sheet: Table S2
	Table S2 Detailed information of RNA-seq data
		mf_1	mf_2	mf_3	ms_1	ms_2	ms_3
	Clean Reads Num	87036204	94717532	100796014	114431238	90697950	92415716
	Clean Data(Gb)	13.06	14.21	15.12	17.16	13.6	13.86
	Q30 Percentage	91.14	92.44	91.16	92.25	92.22	91.89
	GC%	42.65	43.23	43.28	42.59	42.56	42.49
	Mapped Reads	73296794 (84.21%)	80270402 (84.75%)	85415695 (84.74%)	95244006 (83.23%)	75867189 (83.65%)	75411635 (81.6%)
	Uniquely Mapped Reads	71274849 (81.89%)	78168362 (82.53%)	83105369 (82.45%)	92674172 (80.99%)	74011945 (81.6%)	73228865 (79.24%)

## Sheet: Table S3
	Table S3 Statistics of sRNA sequencing data
		mf_1	mf_2	mf_3	ms_1	ms_2	ms_3
	Total Reads	13585767	14465596	12732861	14057598	12902664	15360511
	Clean Reads	12266185	13682861	12312221	13042707	12004358	12512961
	Clean Data (Mb)	289.82	337.57	297.75	309.8	283.66	309.72
	Mapped sRNA	11272460 (91.90%)	12130116 (88.65%)	11172009 (90.74%)	11931338 (91.48%)	10970625 (91.39%)	11156553 (89.16%)
	rRNA	840997	839208	771869	1270824	1009154	1976995
	tRNA	78836	192757	122182	111996	85493	209742
	snRNA	6638	4919	5774	10996	9763	8254
	snoRNA	3533	2978	2992	5998	5031	6471

## Sheet: Table S4
	Table S4 Detailed information of known miRNAs
	Family Name	Member number	miRNA	mf_1 Count	mf_2 Count	mf_3 Count	ms_1 Count	ms_2 Count	ms_3 Count	miRNA mature seqeucne	Length	miRNAs hairpin seqeunces	Length
	miR156	1	Cl-miR156a-5p	65	19	37	32	51	15	UGACAGAAGAGAGUGAGCAC	20	CAAGAGAAACGCAAAGAAACUGACAGAAGAGAGUGAGCACACAAAGGCAAUUUGCAUAUCAUUGCACUUGCUUCUCUUGCGUGCUCACUGCUCUUUCUGUCAGAUUCCGGUGCUGAUCUCUUU	123
	miR157	2	Cl-miR157a-5p	1427	625	816	2092	2278	623	UUGACAGAAGAUAGAGAGCAC	21	GUGUUGACAGAAGAUAGAGAGCACAGAUGAUGAGAUACAAUUCGGAGCAUGUUCUUUGCAUCUUACUCCUUUGUGCUCUCUAGCCUUCUGUCAUCACC	98
			Cl-miR157d	54	26	28	98	104	17	UGACAGAAGAUAGAGAGCAC	20	GUGGAGGGUGAUAGUGUGGUUGCUGACAGAAGAUAGAGAGCACUAAGGAUGCUAUGCAAAACAGACACAGAUAUGUGUUUCUAAUUGUAUUUCAUACUUUAACCUCAAAGUUGAUAUAAAAAAAGAAAGAAAGAUAGAAGAGCUAGAAGACUAUCUGCAUCUCUAUUCCUAUGUGCUCUCUAUGCUUCUGUCAUCACCUUUCUUUCUCUAUUUCUCUCUAC	221
	miR159	3	Cl-miR159a	60295	35378	46674	87174	79052	32558	UUUGGAUUGAAGGGAGCUCUA	21	GUAGAGCUCCUUAAAGUUCAAACAUGAGUUGAGCAGGGUAAAGAAAAGCUGCUAAGCUAUGGAUCCCAUAAGCCCUAAUCCUUGUAAAGUAAAAAAGGAUUUGGUUAUAUGGAUUGCAUAUCUCAGGAGCUUUAACUUGCCCUUUAAUGGCUUUUACUCUUCUUUGGAUUGAAGGGAGCUCUAC	184
			Cl-miR159b-3p	19790	8200	9736	24938	23169	11271	UUUGGAUUGAAGGGAGCUCUU	21	GGAAGAGCUCCUUGAAGUUCAAUGGAGGGUUUAGCAGGGUGAAGUAAAGCUGCUAAGCUAUGGAUCCCAUAAGCCUUAUCAAAUUCAAUAUAAUUGAUGAUAAGGUUUUUUUUAUGGAUGCCAUAUCUCAGGAGCUUUCACUUACCCCUUUAAUGGCUUCACUCUUCUUUGGAUUGAAGGGAGCUCUUCAUCUCUC	196
			Cl-miR159c	2272	790	620	2310	2444	1144	UUUGGAUUGAAGGGAGCUCCU	21	GUGUAACAGAAGGAGCUCCCUUCCUCCAAAACGAAGAGGACAAGAUUUGAGGAACUAAAAUGCAGAAUCUAAGAGUUCAUGUCUUCCUCAUAGAGAGUGCGCGGUGUUAAAAGCUUGAAGAAAGCACACUUUAAGGGGAUUGCACGACCUCUUAGAUUCUCCCUCUUUCUCUACAUAUCAUUCUCUUCUCUUCGUUUGGAUUGAAGGGAGCUCCUUUUCUUCUUC	225
	miR160	2	Cl-miR160a-3p	12	3	2	6	8	3	GCGUAUGAGGAGCCAUGCAUA	21	GUAUGCCUGGCUCCCUGUAUGCCAUAUGCUGAGCCCAUCGAGUAUCGAUGACCUCCGUGGAUGGCGUAUGAGGAGCCAUGCAUAU	85
			Cl-miR160a-5p	295	166	211	425	349	193	UGCCUGGCUCCCUGUAUGCCA	21	GUAUGCCUGGCUCCCUGUAUGCCAUAUGCUGAGCCCAUCGAGUAUCGAUGACCUCCGUGGAUGGCGUAUGAGGAGCCAUGCAUAU	85
	miR162	1	Cl-miR162a-3p	2496	1120	1491	2963	2825	2708	UCGAUAAACCUCUGCAUCCAG	21	UAGUUGGAAGAAGAGUGAGAGUCGCUGGAGGCAGCGGUUCAUCGAUCUCUUCCUGUGAACACAUUAAAAAUGUAAAAGCAUGAAUAGAUCGAUAAACCUCUGCAUCCAGCGUUUGCCUCUUGUAUCUUUCUUAUUGACUU	140
	miR164	2	Cl-miR164a	314	131	208	427	298	125	UGGAGAAGCAGGGCACGUGCA	21	GGGUGAGAAUCUCCAUGUUGGAGAAGCAGGGCACGUGCAAACCAACAAACACGAAAUCCGUCUCAUUUGCUUAUUUGCACGUACUUAACUUCUCCAACAUGAGCUCUUCACCC	113
			Cl-miR164c-5p	148	70	95	170	151	64	UGGAGAAGCAGGGCACGUGCG	21	UAACACUUGAUGGAGAAGCAGGGCACGUGCGAACACAAAUGAAAUCGAUCGGUACUUGUUGAUCAUAUUUUCGCACGUGUUCUACUACUCCAACACGUGUCU	102
	miR165	1	Cl-miR165a-3p	90	36	74	137	123	53	UCGGACCAGGCUUCAUCCCCC	21	GUUGAGGGGAAUGUUGUCUGGAUCGAGGAUAUUAUAGAUAUAUACAUGUGUAUGUUAAUGAUUCAAGUGAUCAUAGAGAGUAUCCUCGGACCAGGCUUCAUCCCCCCCAAC	111
	miR166	1	Cl-miR166a-3p	16968	10077	15785	28488	24124	13512	UCGGACCAGGCUUCAUUCCCC	21	AGGGGCUUUCUCUUUUGAGGGGACUGUUGUCUGGCUCGAGGACUCUGGCUCGCUCUAUUCAUGUUGGAUCUCUUUCGAUCUAACAAUCGAAUUGAACCUUCAGAUUUCAGAUUUGAUUAGGGUUUUAGCGUCUUCGGACCAGGCUUCAUUCCCCCCAAUUGUUGCUCCCU	170
	miR167	2	Cl-miR167a-5p	1285	754	1094	1442	1053	480	UGAAGCUGCCAGCAUGAUCUA	21	UGGUGCACCGGCAUCUGAUGAAGCUGCCAGCAUGAUCUAAUUAGCUUUCUUUAUCCUUUGUUGUGUUUCAUGACGAUGGUUAAGAGAUCAGUCUCGAUUAGAUCAUGUUCGCAGUUUCACCCGUUGACUGUCGCACCC	138
			Cl-miR167d	2149	1073	1524	3529	2649	1242	UGAAGCUGCCAGCAUGAUCUGG	22	UGUUGGUUUUUAGAAGCUGAAGCUGCCAGCAUGAUCUGGUAAUCGCUACAUACGACAUACACACAUCACUAAACUUCUUUAUAAUUUAUGCACACACAUACAGCUCUUAAUGGCCACAACUCAAAGUUAUAAUUAGUGCAUGAUCUCUAGUUAUUUGACUGCUUUUAAUAUAUGUUUAUGGAUUCACGCAUGUGUGUGUAUGUACAUAAUUUACAUGCAUGCACUUUGUGUAUGGUACACAUCAAUUUGAACCCGUUCAAAAUUCUGUUUUUAUUAGUAUAUAUAUAGAUGUAUGUGGUGUGUGUGUCAGUGUGUGUGUGUGUUUAUAGAUAGUAGUACUAGGUCAUCCUGCAGCUUCAGUCACUAAAUCACCAACA	377
	miR168	2	Cl-miR168a-3p	254	123	128	406	433	143	CCCGCCUUGCAUCAACUGAAU	21	CACCAUCGGGCUCGGAUUCGCUUGGUGCAGGUCGGGAACCAAUUCGGCUGACACAGCCUCGUGACUUUUAAACCUUUAUUGGUUUGUGAGCAGGGAUUGGAUCCCGCCUUGCAUCAACUGAAUCGGAUCCUCGAGGUG	138
			Cl-miR168a-5p	448	238	249	480	513	157	UCGCUUGGUGCAGGUCGGGAA	21	CACCAUCGGGCUCGGAUUCGCUUGGUGCAGGUCGGGAACCAAUUCGGCUGACACAGCCUCGUGACUUUUAAACCUUUAUUGGUUUGUGAGCAGGGAUUGGAUCCCGCCUUGCAUCAACUGAAUCGGAUCCUCGAGGUG	138
	miR169	1	Cl-miR169b-5p	3	3	5	3	4	1	CAGCCAAGGAUGACUUGCCGG	21	CCCAACGGAGUAGAAUUGCAUGAAGUGGAGUAGAGUAUAAUGCAGCCAAGGAUGACUUGCCGGAACGUUGUUAACCAUGCAUAUGAAUAAUGUGAUGAUUAAUUAUGUGAUGAACAUAUUUCUGGCAAGUUGUCCUUCGGCUACAUUUUGCUCUCUUCUUCUCAUGCAAACUUUCCUUGGG	181
	miR171	2	Cl-miR171a-3p	112	69	105	385	304	83	UGAUUGAGCCGCGCCAAUAUC	21	AUGAGAGAGUCCCUUUGAUAUUGGCCUGGUUCACUCAGAUCUUACCUGACCACACACGUAGAUAUACAUUAUUCUCUCUAGAUUAUCUGAUUGAGCCGCGCCAAUAUCUCAGUACUCUCUCGU	123
			Cl-miR171b-3p	105	62	67	123	112	12	UUGAGCCGUGCCAAUAUCACG	21	UGCAAGGUAACGCGAGAUAUUAGUGCGGUUCAAUCAAAUAGUCGUCCUCUUAACUCAUGGAGAACGGUGUUGUUCGAUUGAGCCGUGCCAAUAUCACGCGGUAAACCAAAAAUGGCA	117
	miR172	3	Cl-miR172a	55	37	29	50	59	9	AGAAUCUUGAUGAUGCUGCAU	21	UGCUGUGGCAUCAUCAAGAUUCACAUCUGUUGAUGGACGGUGGUGAUUCACUCUCCACAAAGUUCUCUAUGAAAAUGAGAAUCUUGAUGAUGCUGCAUCGGC	102
			Cl-miR172c	90	39	47	37	43	22	AGAAUCUUGAUGAUGCUGCAG	21	AGCUACUGUUCGCUGUUGGAGCAUCAUCAAGAUUCACAAAUCAUCAAGUAUUCGUGUAAAUAAACCCAUUUAUGAUUAGAUUUUUGAUGUAUGUAUGAGAAUCUUGAUGAUGCUGCAGCUGCAAUCAGUGGCU	133
			Cl-miR172e-3p	23	21	18	32	28	8	GGAAUCUUGAUGAUGCUGCAU	21	GUAGUCGCAGAUGCAGCACCAUUAAGAUUCACAAGAGAUGUGGUUCCCUUUGCUUUCGCCUCUCGAUCCGCAGAAAAGGGUUCCUUAUCGAGUGGGAAUCUUGAUGAUGCUGCAUCAGCAAAUAC	125
	miR2111	1	Cl-miR2111a-5p	23	12	15	45	33	6	UAAUCUGCAUCCUGAGGUUUA	21	CGAUGAUGAGUAUUGGUGAGGACCGGGUAAUCUGCAUCCUGAGGUUUAAAGCUUAAUUUACGCAGGAAAUUUGUAUACGCAUAUACGUAUGUGUAUUAGUAUACCUUUUAGUCCUCGGGAUGCGGAUUACCUCGUUCUUACUUACAAUACACGUACUCG	159
	miR319	2	Cl-miR319a	15236	7808	9721	20166	18735	7333	UUGGACUGAAGGGAGCUCCCU	21	AGAGAGAGCUUCCUUGAGUCCAUUCACAGGUCGUGAUAUGAUUCAAUUAGCUUCCGACUCAUUCAUCCAAAUACCGAGUCGCCAAAAUUCAAACUAGACUCGUUAAAUGAAUGAAUGAUGCGGUAGACAAAUUGGAUCAUUGAUUCUCUUUGAUUGGACUGAAGGGAGCUCCCUCU	176
			Cl-miR319c	3494	1464	1078	3372	3540	1604	UUGGACUGAAGGGAGCUCCUU	21	UAGAUAUAGAAGGAGAUUCUUUCAGUCCAGUCAUGGAUAGAAAAAGAAGAGGGUAGAAAUAUCUGCCGACUCAUCCAUCCAAACACUCGUGGUAGAGAAACGAUAAAUUUAAACCGCAGUGACUGUGUGAAUGAUGCGGGAGAUAUUUUUGAUCCUUCUUUAUCUGUGUUUGGACUGAAGGGAGCUCCUUCUUUUUCUA	199
	miR390	3	Cl-miR390a-3p	22	15	12	77	59	15	CGCUAUCCAUCCUGAGUUUCA	21	GUAGAGAAGAAUCUGUAAAGCUCAGGAGGGAUAGCGCCAUGAUGAUCACAUUCGUUAUCUAUUUUUUGGCGCUAUCCAUCCUGAGUUUCAUUGGCUCUUCUUACUAC	107
			Cl-miR390a-5p	530	225	320	543	502	244	AAGCUCAGGAGGGAUAGCGCC	21	GUAGAGAAGAAUCUGUAAAGCUCAGGAGGGAUAGCGCCAUGAUGAUCACAUUCGUUAUCUAUUUUUUGGCGCUAUCCAUCCUGAGUUUCAUUGGCUCUUCUUACUAC	107
			Cl-miR390b-3p	4	1	0	12	9	2	CGCUAUCCAUCCUGAGUUCC	20	GAGAAAUAGCUAUAAAGCUCAGGAGGGAUAGCGCCAUGGCUCACCAGUGCUGUAUGUUUUGUAUAUGCGUACAUGUAUAUCUGUUGGCGCUAUCCAUCCUGAGUUCCAUAGCUUCUUCUU	120
	miR393	1	Cl-miR393a-5p	164	91	100	128	98	68	UCCAAAGGGAUCGCAUUGAUCC	22	AGAGGAAGGAUCCAAAGGGAUCGCAUUGAUCCUAAUUAAGGUGAAUUCUCCCCAUAUUUUCUUUAUAAUUGGCAAAUAAAUCACAAAAAUUUGCUUGGUUUUGGAUCAUGCUAUCUCUUUGGAUUCAUCCUUC	133
	miR394	1	Cl-miR394a	1763	1022	1319	1676	1502	467	UUGGCAUUCUGUCCACCUCC	20	CUUACAGUCAUCUUUGGCAUUCUGUCCACCUCCUUCUAUACAUAUAUGCAUGUGUAUAUAUAUAUGCGUUUCGUGUGAAAGAAGGAGGUGGGUAUACUGCCAAUAGAGAUCUGUUAG	117
	miR395	1	Cl-miR395a	15	5	14	10	7	9	CUGAAGUGUUUGGGGGAACUC	21	AUGUCUCCUAGAGUUCCUCUGAGCACUUCAUUGGGGAUACAAUUUUUCUAAAUGAUUAUCCACUGAAGUGUUUGGGGGAACUCCCGGACCCAU	93
	miR396	4	Cl-miR396a-3p	364	133	156	152	184	32	GUUCAAUAAAGCUGUGGGAAG	21	CUCUGUAUUCUUCCACAGCUUUCUUGAACUGCAAAACUUCUUCAGAUUUUUUUUUUUUUCUUUUGAUAUCUCUUACGCAUAAAAUAGUGAUUUUCUUCAUAUCUCUGCUCGAUUGAUUUGCGGUUCAAUAAAGCUGUGGGAAGAUACAGAC	151
			Cl-miR396a-5p	3238	1788	2623	1553	1159	477	UUCCACAGCUUUCUUGAACUG	21	CUCUGUAUUCUUCCACAGCUUUCUUGAACUGCAAAACUUCUUCAGAUUUUUUUUUUUUUCUUUUGAUAUCUCUUACGCAUAAAAUAGUGAUUUUCUUCAUAUCUCUGCUCGAUUGAUUUGCGGUUCAAUAAAGCUGUGGGAAGAUACAGAC	151
			Cl-miR396b-3p	159	74	71	62	101	12	GCUCAAGAAAGCUGUGGGAAA	21	GGUCAUACUUUUCCACAGCUUUCUUGAACUUUCUUUUUCAUUUCCAUUGUUUUUUUCUUAAACAAAAGUAAGAAGAAAAAAAACUUUAAGAUUAAGCAUUUUGGAAGCUCAAGAAAGCUGUGGGAAAACAUGACA	135
			Cl-miR396b-5p	5288	3473	4672	3247	2453	1095	UUCCACAGCUUUCUUGAACUU	21	GGUCAUACUUUUCCACAGCUUUCUUGAACUUUCUUUUUCAUUUCCAUUGUUUUUUUCUUAAACAAAAGUAAGAAGAAAAAAAACUUUAAGAUUAAGCAUUUUGGAAGCUCAAGAAAGCUGUGGGAAAACAUGACA	135
	miR398	1	Cl-miR398a-3p	5	4	0	13	5	4	UGUGUUCUCAGGUCACCCCUU	21	UGAAAUUUCAAAGGAGUGGCAUGUGAACACAUAUCCUAUGGUUUCUUCAAAUUUCCAUUGAAACCAUUGAGUUUUGUGUUCUCAGGUCACCCCUUUGAAUCUCCC	105
	miR399	4	Cl-miR399a	7	5	2	2	12	3	UGCCAAAGGAGAUUUGCCCUG	21	AAAUGCAUUACAGGGUAAGAUCUCUAUUGGCAGGAAACCAUUACUUAGAUCUUUGCAUCUCUUUAUGCAUUGCUUUUAAUUAGUGAGUUAUCUGCCAAAGGAGAUUUGCCCUGUAAUUCUUCU	123
			Cl-miR399b	28	13	8	3	13	5	UGCCAAAGGAGAGUUGCCCUG	21	UCACUAGUUUUAGGGCGCCUCUCCAUUGGCAGGUCCUUUACUUCCAAAUAUACACAUACAUAUAUGAAUAUCGAAAAUUUCCGAUGAUCGAUUUAUAAAUGACCUGCCAAAGGAGAGUUGCCCUGAAACUGGUUC	135
			Cl-miR399d	7	5	2	2	12	3	UGCCAAAGGAGAUUUGCCCCG	21	GGUUGGAUUACUGGGCGAAUACUCCUAUGGCAGAUCGCAUUGGCUAGAUAUGCAAGUAAAAUGCUUCUCUGCCAAAGGAGAUUUGCCCCGCAAUUCAUCC	100
			Cl-miR399f	56	23	22	22	38	14	UGCCAAAGGAGAUUUGCCCGG	21	AUAUGCAUUACAGGGCAAGAUCACCAUUGGCAGAGAUCUAUUACUUCAUUCUUGCAUCAUAUGCAUAAAUGUUUGUGGUGAGCUCUCUGCCAAAGGAGAUUUGCCCGGUAAUUCUCUU	118
	miR408	1	Cl-miR408-3p	14	8	5	16	9	0	AUGCACUGCCUCUUCCCUGGC	21	AAGGUUAGAUUGGUAUUGCAAUGAAAGAAGACAAAGCGGUAAUGAGAGAGAGACAGGGAACAAGCAGAGCAUGGAUUGAGUUUACUAAAACAUUAAACGACUCUGUUUUGUCUCUACCCAUGCACUGCCUCUUCCCUGGCUCCCUCUUUUUUUCUCUAUAUUUCUCUCUCUCCUUUCAUUUCACAGCUUUCAAUGGAAUUUUAUUGCUACUGCUAACG	218
	miR5633	1	Cl-miR5633	26	8	12	10	6	7	UAUGAUCAUCAGAAAACAGUG	21	UCUACAAAUUCUUUGGUUUGAUAUGAAGGAAAGAUAUGAUCAUCAGAAAACAGUGAUUUUGUUUAAAGCUCGUUAUAUAUGAUUGGAUUCAUAUGAGAAUUCAAGUAUGUAAGCGAGUAUAACUCAGUCUUGUUUAAAUUAUUUUCAUAUUGAAAUUAUGUGGAGAGAAAAUCAUAUGCAAAUAAGUUAGAAAAUCAUGGAUCCACAUAAUUCCAAUUUGAAAGUGAUGAGCUCUAUUCAGUUAUAGACUUGAAGUCUUGUAAUCUCUUAUGAAUCUAAUCAUAGCGAGCUUUAGGUAAUAUCACAGUUUUCUAUGAUCAUACCUUUACUUUAAAUCAUUCCAAAGUAUUUGUGGA	356
	miR8175	1	Cl-miR8175	29	4	11	26	32	12	GAUCCCCGGCAACGGCGCCA	20	CUUAAGGCAAUUUGACCUAUAUCAAAUUUGGCACCGUUGCCGGGGAUCGACCCGGGUCACCCGCGUGACAGGCGGGAAUACUUACCACUUAGUACAACGACCCAAUAUAGUGGUAAGUAUUCUCGCAUGUCACUCGGGUUCGAUCCCCGGCAACGGCGCCAAAUUUGAUAUAGCUCAAAUCGCCUUAAG	189
	miR858	2	Cl-miR858a	126	30	49	59	64	33	UUUCGUUGUCUGUUCGACCUU	21	CUCAUCUUUGUUUCGUUGUCUGUUCGACCUUGGUCUCGAUCUCUCCUCAAAACCCUAAUACGCGCUUUAUCGUUUAUUUCAUUCAUCCAUCCUUCUUAUGAUCAUCAUAAACUAACGUACAUGGUUUAUCGGUUUGUUAUUGAUGGGGAUUGGGGUAGAUAGACGAUCGAAACUUUUGAUUUCUGAG	187
			Cl-miR858b	126	30	49	58	63	33	UUCGUUGUCUGUUCGACCUUG	21	CCUACCCGAAGGGUUUUGGAGAGUAGACAAAGAGACAAACAUAGAGGUGUGAGUUUGGUUUGGUUUUGGGUUUUGGGGGGUUGGUAGUGUUUGAGGUCCAUAUGCCUCGAUCUUCCGCUUCUAUUAAUUAAUUUUCUCUAUUAGAAAUAUUAUCUAAUUAUUCCACUCCAUCGAACCAUGCACAUAUAUAAUGAUAUGUAUAAGCCCAUCAAAGUUUUUGAAUUCAGUGCAAACACUUGUCAAAGGAGCAGUCCCGAUCUGGUUCCAUCUUAUCUUCGUUGUCUGUUCGACCUUGGCUUUGGC	303

## Sheet: Table S5
	Table S5 Detailed information of novel miRNAs
	miRNA name	mf_1 Count	mf_2 Count	mf_3 Count	ms_1 Count	ms_2 Count	ms_3 Count	mature sequence	Length	Star sequence	Star Length	Hairpin sequence	Length	Hairpin Position	Energe
	novel_101	10	9	13	12	7	21	augacugggcucaaucgauaauac	24	auuauugauagagccaugucauaa	24	auuauugauagagccaugucauaacccgccccuggguagcaaccgggccaaaaaacagagaccaucuccccaacugagccuagucaccacccaaccgggguaaaaaucgggcccauugauaaauggucccuauuuuuggcuugguugcuaccuaggucggguuaugacugggcucaaucgauaauac	187	Chr10:19565193..19565380:-	-102.1
	novel_104	25	26	27	13	13	12	aagcgaucgcacacuuuuucug	22	aagugugcgaucgcuuacauc	21	aagugugcgaucgcuuacaucugcuuaugcgaucacugacaucaacauaggcgaucacguacaucagccuaugcgaucacuuacaucagcuuaugugaucgcaguuuuuguuuugcaauuuuguuuuggucauaucuucgucaauacaacuccguuuuugcuaaaugaccacucguuuucauauguuuuuuuuguguucuuuccaauuaugcugauauaagugauugcguauguugauguuagcgaucacauaggcugauguaagcgaucgcacacuuuuucug	284	Chr1:10997219..10997503:-	-122.14
	novel_107	1556	1771	1942	1539	1286	1770	aguuuaucacggucuaucacugau	24	cgauauaccgcaauaaacuucugu	24	cgauauaccgcaauaaacuucugucgcuugagcgauaaacaaacuucuaucgcucaagugauagaaguuuaucacggucuaucacugau	89	Chr9:12527924..12528013:+	-48.4
	novel_108	8	17	12	31	26	7	aacacauuuaccgucgggagaggu	24	ccuucucgcgacgguaaaaguu	22	ccuucucgcgacgguaaaaguugguugagcgucgagauaaacacgcuucccauggucaugcguugggagcaacguguuauccccacaguuaaacgcuuucucuugacgcgcauaaguuugcgucgagaaauauuccuucuugcgaugauaaaaguugguugagcgucgaaauaaacgcguucucccuacggucaugcgucaggagcaacgcguuauccccacgccauuugauucaacgucgggagaaauuuaugccgacgcaaucaaacacauuuaccgucgggagaggu	290	Chr7:5865246..5865536:+	-112.7
	novel_109	18	26	25	16	6	8	aauaaugugcucuaacauaaguag	24	cgcuagaauauauuaccgcauuuu	24	cgcuagaauauauuaccgcauuuuauaaugucucacauuagggauggucaugucuaucguaacucuaacacgauccuuauuuuuccauacuuuguugugcugucaacaugaauauuguacuuaaguggagaaaaauaagaaucgcgauaaacaugaccaucacgucaggguuaugauagacaugaccauccuuaacaccgauaaauuauaaacgcaauaaugugcucuaacauaaguag	239	Chr7:30345894..30346133:-	-85.2
	novel_11	1073	724	1075	2233	1584	518	uuccaaguccacccaugcccgc	22	gggcaucggcgacuuggaaac	21	gggcaucggcgacuuggaaacuggaaauugaaacuuuagagcauuucauucucuucgcugugaauuugaacuguucuuuacuuuccaaguccacccaugcccgc	104	Chr1:6044783..6044887:+	-35.51
	novel_116	27	13	21	21	12	26	augucuaucuguaucuauugcagu	24	cgcaauagaucuagauagacaucu	24	cgcaauagaucuagauagacaucuauucaugucuaccaugucuaucugguaaaugauagaugucuaucuguaucuauugcagu	83	Chr11:8301139..8301222:-	-41.8
	novel_117	13	18	17	14	22	12	aaauuuggucucuaugguuugaag	24	uaaggaccuagauuuucaauuu	22	aaauuuggucucuaugguuugaagaaagaauuuagucucuauaauuuuaaaaguuagaauuuaguccuuaugguuugauaaaccucaugaauagucucuauaaggacuauuuaugagaauuuuuucaaaacuauauggacuaaauuuuaauuauaaaccauagggacuaaauucuaguuauacaccauaagaauuaaauucuaauuuucuccaaaccauaaggaccuagauuuucaauuu	240	Chr3:487640..487880:+	-89.8
	novel_119	35	31	49	59	40	66	agcgaucguuuagauuaucuaggc	24	uuagauggucuaaacaaucguuga	24	uuagauggucuaaacaaucguugauauacaucuacugauauacaucuacaugaucguagaugucucucaacuaucgaguagaauaucuaaacgaucgaugaguuuauaauaagcgaucgcauagacuaugcgaucgccuaguauauauacaugaucguuugauacgauauaagcgaucguuuagauuaucuaggc	195	Chr1:9848207..9848402:+	-76.4
	novel_12	1238	691	1032	1698	1400	852	uuccacggcuuucuugaacug	21	guucaauaaagcugugggaag	21	uuccacggcuuucuugaacugcauuucauguucuucuucuucuucuucuucaaaaaaaaaaaaaaaaaaaaaaaaaaaaaaagagagagagagagagagagagagaguaauuuuuuuuuauuuuuuuauuuuuuuuuuuuauuuucuucuuucaaugaauuucaauggcugcaguucaauaaagcugugggaag	194	Chr11:23743690..23743884:+	-54.5
	novel_120	18	36	43	18	25	25	uuugagggucuaguugcaauuacu	24	uaguugcaacuaaaccuuuaaac	23	uaguugcaacuaaaccuuuaaaccuuugauuuuaaaaauuaaacccucaagauuauauaaauguuaaaauugagucaaauuaaaccaucaaacuuauacaauuguauaaauuauaacauuuguauuaguuuaagaguuuaauuuuuaucuugugugggucaaauuuauaaaauuauuauaaacuugagggucuaauuuuaacacuuguaaaaauuuaagggcccaauuuuauuauugaaaguuugagggucuaguugcaauuacu	265	Chr9:440339..440604:-	-74.5
	novel_121	297	254	256	407	353	322	agucuaucacggucuaucacugau	24	auagaucgcgauagacuuuuaucg	24	auagaucgcgauagacuuuuaucguuugagugauagaagucuaucgcaguccaucguugaagcgauaaaagucuaucacggucuaucacugau	93	Chr10:4568366..4568459:-	-42.5
	novel_125	2106	850	1081	1940	1942	1537	ucucggaccaggcuucauucu	21	agaauggagucugguucgaga	21	agaauggagucugguucgagaguguuuauaugaauagauucaaaaagauaaucuuucauccgaaugaucucggaccaggcuucauucu	88	Chr6:7510350..7510438:-	-41.8
	novel_128	4891	2530	3875	6572	5863	4078	ucucggaccaggcuucauucc	21	ggaaugcugucugguucgaga	21	ggaaugcugucugguucgagaccguucgucaaucgauugucgucgguacaugauaggaacgaucucggaccaggcuucauucc	83	Chr5:4155992..4156075:+	-44.1
	novel_13	870	402	522	1356	1218	643	uuagaugaccaucaacgaacg	21	uuuguuguuggucaucucacc	21	uuuguuguuggucaucucaccauccaaauuucauccauuaaagccauuugguuagaugaccaucaacgaacg	72	Chr6:15915479..15915551:-	-25.3
	novel_14	1456	658	853	957	1187	477	ugccaaaagagacuugcccug	21	gugcgagucucuauuggcag	20	gugcgagucucuauuggcagagauuuauuauuauaucucaaauagaaaagaaaaaaaaaauguuuuguuuuugcuucuucuucuucuucuucuucugccaaaagagacuugcccug	116	Chr1:32227139..32227255:+	-36.4
	novel_17	430	433	534	1135	953	1009	uuccaucuaaugauaccguagcau	24	cuacuguaucauuagaaggaggc	23	uuccaucuaaugauaccguagcauuaaaaguaauauccuacaaauguuuagaaugaaguucaaagcaaaaaagacaaggaaauuuugcauugcuuucuaaugcuacuguaucauuagaaggaggc	125	Chr3:3511064..3511189:-	-41.5
	novel_20	421	260	329	669	574	160	uggagaagcagggcacgugcu	21	ucaugugccccucuucaccauc	22	uggagaagcagggcacgugcugcacuaacucaauuucccaaaugcaauucaaaaaucccaucuuuuuuuuuuuucuuuuuuuuuuuucuuuuuuaauucuaauguuugaaauaagagauuuugaaauuuagaagggaaaaaaaggguuuuuuuuuuuuuuuuuuuuuuuugaguuaguucuucaugugccccucuucaccauc	203	Chr4:18094281..18094484:-	-59.39
	novel_24	100	71	85	589	417	91	cgcuauccauccugaguuucc	21	aagcucaggagggauagcgcc	21	aagcucaggagggauagcgccguguggucgacuucgguucgauucagcuuccccgacaccgucuuauucuuucucggcgcuauccauccugaguuucc	98	Chr4:18286278..18286376:-	-45.54
	novel_25	350	432	339	238	246	249	auuaauguaggaucuacuaguugu	24	cuaagauccacuuacauuaaugug	24	cuaagauccacuuacauuaaugugagguucacaaauauuuaugaauacaaauuuauugugugaaugaauggaguauaguacucuuguaguacuacgaacuuuuuugggaaaacuuccuauacucuauuuauugugugucaugucaacaugauuuuaaauauaauaugucacugauauuaauguaggaucuacuaguugu	199	Chr5:5222233..5222432:+	-52.9
	novel_26	140	57	135	110	122	69	uugaagcugccagcaugaucu	21	ggucauucuagcagcuucaau	21	uugaagcugccagcaugaucugauuuaauuuucugauucucuuaauagagauuuuuauaaagcaaaauugaaugaauaaauguugcuguuuaagggguuuuuguuugaaaaucaggucauucuagcagcuucaau	135	Chr1:25650936..25651071:+	-43.8
	novel_28	48	35	28	44	29	17	gagugggauuucgaauaucgcg	22	gauucgauuucccauuuuccauu	23	gagugggauuucgaauaucgcguaucugcauuuauuaccgacgguuuaauuagcucuuuauaaacgcgauucgauuucccauuuuccauu	90	Chr0:5706997..5707087:-	-25.82
	novel_29	247	218	222	253	221	119	acugacuuugcccaaugggggcug	24	agccccucguugggcauggcagugu	25	agccccucguugggcauggcaguguggaauuauauucaauuauauauucaaaauuucaauguuaauuccacugacuuugcccaaugggggcug	93	Chr1:4370707..4370800:-	-40.1
	novel_34	191	126	180	174	166	168	ucugaucuguagguucauuagguc	24	acuaauacuuaaggaugcagaggu	24	acuaauacuuaaggaugcagagguaauccaaggguaaagugguaguuuugacucagcuauuguuacgaacacucguuaaggguuaacuuguuggucuauguccaugggcacauuaauauauauuugcaaugagaagaguguaauugugcgucuauaguagaguauacucguagauaacaaauauugauuaccuugguuaaugaguuuagcuaauuaaucucauaucguuggacuucugaucuguagguucauuagguc	258	Chr3:10476500..10476758:+	-67
	novel_35	157	170	215	163	142	178	uagacugcgauaaacuucuauugc	24	auagaaguuugucacaguuuauca	24	uagacugcgauaaacuucuauugcgaacuuuuauuacgacugcgauagacaucuauugcuuaaaaaauagaaguuugucacaguuuauca	90	Chr10:5956910..5957000:-	-31.9
	novel_36	121	166	272	198	160	223	acuuguauuuuuggaugacuaggc	24	uagucauccaaaaauacaagcucc	24	acuuguauuuuuggaugacuaggcuaccaaauaaguuagcuacgcuaaaaaaucuagaguuucaauuuugaauaagguggcaaaguaggggaauuuaaaaggacauuuuuuguucaaaauuuuggucguuuaauauuuucgcguguugguuguuggcauuuuauuucaccuucaucuuacucaauacaucuaaagccuagucauccaaaaauacaagcucc	221	Chr7:1460440..1460661:+	-67.1
	novel_37	211	195	195	153	138	118	aauuguaaagacuacuacugaagu	24	uuagaggugauuguuacaauuugc	24	aauuguaaagacuacuacugaaguauggugguaguugcaauuacacccgugaauuuucaccguuaaaaauugggcucucaaacuucuaaguguuaacauugaaccaucaaacuuauaauagcaauagaaauuguuacaauuucuacaauuauauaaguuugagauuccaauuuuaacacuuguauaaauuugaggacucaacauuuacaauuagaaauuugagaguauaauuacaacuaucauuauacuuuagaggugauuguuacaauuugc	273	Chr10:25637907..25638180:+	-88.9
	novel_38	45	47	45	164	135	51	cgcuaucuauccugaguuuca	21	aagcucaggagggauagcgcc	21	aagcucaggagggauagcgccguugaauaaugaugaucggaauauaaaagaucaccagaauauucauuauuucagccgugcuuuuccggcgcuaucuauccugaguuuca	110	Chr2:29787688..29787798:-	-45.7
	novel_40	152	134	183	156	155	298	agacugcgaucgacuacuaucugu	24	aaaucuuaguugauuguagucuau	24	agacugcgaucgacuacuaucugugucuauuuguacacaaauaaacacaaaucuuaguugauuguagucuau	72	Chr5:2351186..2351258:+	-33.7
	novel_42	124	206	200	149	147	263	uucgaacuacuagaugaauaauuu	24	aauuaucguuuaguuaaguucacu	24	aauuaucguuuaguuaaguucacuuugacguaaguggaaagauucgaacuacuagaugaauaauuu	66	Chr9:30474219..30474285:-	-16
	novel_43	175	106	102	88	120	38	ugccaaaggagaguugcccuuc	22	agggcuucucucccuuggcagg	22	agggcuucucucccuuggcaggcaaaauuauggcucaccuuucauguccugccaaaggagaguugcccuuc	71	Chr1:3038194..3038265:+	-36.3
	novel_46	108	93	128	115	103	128	agucuaucguggucuauuguugau	24	caaccauagacuugcaauaaacu	23	caaccauagacuugcaauaaacuucuaucgcuugaaauauagaagucuaucguggucuauuguugau	67	Chr2:7312923..7312990:-	-20
	novel_47	191	144	189	145	135	80	uucucucccucaagggcuucugg	23	cgaggcccuaggggagaguacg	22	uucucucccucaagggcuucuggcaauggcaaucaaacaugaauauuuauugcacccguguccgaggcccuaggggagaguacg	84	Chr8:1935618..1935702:-	-37.2
	novel_48	106	76	140	170	127	77	ugagccaagaacgacuugccggc	23	cggcaaagucuucuucggcucuug	24	ugagccaagaacgacuugccggccgacuuuugacaccugucuuuucgucggcaaagucuucuucggcucuug	72	Chr6:22786405..22786477:+	-33.4
	novel_49	38	46	47	68	51	45	augucuaucugggucuaucguagu	24	ccacaauaaacccagauaggcauu	24	ccacaauaaacccagauaggcauuaaucugugucuaucugguaaagugagaugucuaucugggucuaucguagu	74	Chr2:22819604..22819678:+	-27.7
	novel_50	28	18	33	25	21	29	uugagucuuccaaaucuucuuuga	24	aauagaggauuuccauggacuugg	24	uugagucuuccaaaucuucuuugagcuucagcuucaaagacuucaacuucaaagucuuuaauuuucaagucuuuagaacuuuagggcuugagaaccucgaucuucaguucuuuagaauuuuagagcuucaaucuucagaacuugugagcuuggguaguuucgguuuucauaucucgagagcuuuaguuuauaauucuuuagaacuucaauuguuucaguacuucguuccuuaacucuuuuuuucuucccaaaugaagaggaagacucuauaauagaggauuuccauggacuugg	294	Chr5:9710991..9711285:-	-72.74
	novel_51	84	125	113	121	114	125	augucuaucuggguuuaucgcagu	24	acgcgauagacccauauagacauu	24	acgcgauagacccauauagacauuauuuaucuaguaaauugauagaugucuaucuggguuuaucgcagu	69	Chr1:26507841..26507910:-	-33.5
	novel_53	86	108	141	85	90	115	uaauaguucuggaaauuagacucc	24	aggucuaauuucuacaaucauugu	24	uaauaguucuggaaauuagacucccaaauaauaaaguugaacccucaaauaaguuuuuaucauuuuggaggucuaauuucuacaaucauugu	92	Chr3:233014..233106:+	-24.8
	novel_54	142	134	96	95	79	60	auugaacucuuaaauuaucauaag	24	uaugaaagcuuaaggauuuaacug	24	auugaacucuuaaauuaucauaagucaaucaauugaccguuuauuacauugucuuugaaaaucauuuaugcauuaauucuuaaacguguacuucuuuaaauguuaguuuuauaaaauggaugauuagaguaaaugcauagauaguuauuaaaggaaauuuugaauaagaaucuaaauauauucauuuaugaaagcuuaaggauuuaacug	210	Chr10:3847155..3847365:-	-39.14
	novel_55	59	61	100	74	59	125	aaagcuagggaccaaauagaaacu	24	uuuucauuugguuuuuagguuuca	24	uuuucauuugguuuuuagguuucaaaaucuuguauuuuuauccuacauuuucauucaugcuuauuuuugguccuuuguguuaacuuucuauuucacuaauuuuuuaucacuauuaacauauugaaagcuagagagcaauugaaacuaaacuuuaaaacucaaggauaaaaguauaacauuagaauuuagagacaaaauggaaacuacacgcaaaauucauggauaaaaaugucacauuaugaaagcuagggaccaaauagaaacu	265	Chr4:22947753..22948018:+	-54.53
	novel_56	79	55	59	191	157	103	uguguucucaggucgccccua	21	agggucgucccgagaacacauguc	24	agggucgucccgagaacacaugucauuguacuaucuaagugccauuugauguguguucucaggucgccccua	72	Chr3:19840728..19840800:-	-37.6
	novel_58	155	112	89	73	101	36	ugccaaaggagaauugcccug	21	gugcaauucuccuuuggcaac	21	gugcaauucuccuuuggcaacaacauguuccaacuaccaaucacuauuuuauaugcccaaccaaaaaaaaaaaaacaaauaaaugcauauaaaugucuuugccaaaggagaauugcccug	120	Chr3:8036674..8036794:-	-36.13
	novel_61	22	22	24	13	15	9	uuugaugguccaguuuuaacacu	23	guuaaagguuugaucguccuacc	23	uuugaugguccaguuuuaacacuuguauaagcuugagggcucaauuuuuauaauugaaaguuugagaguguaauugcaucuaccaccauacuuuaggugugguuuuugcaauuuaucuuaaaacuaaauaguuaacaaaaaaagcaagucaguuuuucucccuacauguucaugucccaccaucuguuaccaaguuaauaguauugaacuguuuugauagccaaaaugagccuaguucaacugguaucaaguauguacuaucaaccucgagguuaaagguuugaucguccuacc	294	Chr2:21441019..21441313:+	-65.91
	novel_62	40	41	38	29	24	13	caagucauccuaguuagaaacacu	24	uguuuuaacuaagaugacucgaag	24	uguuuuaacuaagaugacucgaaguguuugaauuuuuugacaaaauauuagaagugcaguuaucucauaucaaagaaauuuaggaaaguuauuuguccuacauugaaaugguuuaggaaagccaugggcuuguccuacauugaaaaaguuuagaaaagucaugggcucuaagcacuauaaaagaagucuauaucuuugguuucaagucauccuaguuagaaacacu	226	Chr6:25298953..25299179:-	-52.4
	novel_64	31	37	37	28	26	34	acuucggucuccguauuuuuuacu	24	caaaaaguacagauaucaaaguaau	25	acuucggucuccguauuuuuuacuuugauucauuuuaaucuuuauauauuuuuaacuuuuguucauuuuuguccuuuaacuuuagaaaagugacuauuuugaucucuuaaaaaugaaguaaaaaugagaaugaagagaccaaaauggucaauuuugaaaguacaagaaccaaaaugaauauuuugaaaguauaugaaccaaaauugaaaauauagggucgaaaaugaacauuuuuuaaaguauaaggauuaaaauaaacgaaaacaaaaaguacagauaucaaaguaau	289	Chr3:25222896..25223185:-	-72.3
	novel_65	22	23	21	18	11	24	uuacgauagaucgcaauagacuac	24	agucuaucacgaucuaucauaaau	24	uuacgauagaucgcaauagacuacuagucuaucacgaucuaucauaaau	49	Chr1:5192474..5192523:+	-21
	novel_69	29	15	17	51	40	19	agauguugguccgguucaaua	21	uugagccgugccaauaucacg	21	agauguugguccgguucaauaagaaaguagugcucuguuuaacuuggguucuucuuuuuuauugagccgugccaauaucacg	82	Chr2:11052147..11052229:+	-40.8
	novel_7	1709	1104	1323	1983	1743	721	cuuggacugaagggagcuccc	21	gagcuuucuucaguccacu	19	gagcuuucuucaguccacucauggguggcgguaggguuuaauuagcugccgacucauucauucaaauacugagucaaaaauucaucucuauggauucaguaaacgauugaaugaugcgggagacaaauugaaucuuaagcuuccuguacuuggacugaagggagcuccc	169	Chr1:1904196..1904365:+	-77.6
	novel_70	46	32	53	77	75	70	agauacugggaaucugauuac	21	uuucugauuacaguguuuggauu	23	agauacugggaaucugauuacaguguuugaagcgguauuucugauuacaguguuuggauu	60	Chr2:12491874..12491934:-	-13.9
	novel_71	11	6	15	56	38	14	uucgcuguggcuuuuguaaua	21	uuacaauaggcacagugaagu	21	uuacaauaggcacagugaagugaagugaagugaagugaggagaagagaaauuucauuuuaauuuaauuucacuucgcuguggcuuuuguaaua	93	Chr3:5356894..5356987:+	-39.6
	novel_77	51	28	37	48	46	16	ugccaaaagagacuugccccg	21	gagcaagucuccuuuggc	18	gagcaagucuccuuuggcagaucgaucauacacaaagagcauuucauugcauuuaugaugauagcucuguuuuaguucugccaaaagagacuugccccg	99	Chr1:32233935..32234034:+	-39.1
	novel_78	59	40	23	20	22	4	ugccaaaggagaguugcccua	21	gggcaaucucuuucuuggcagg	22	gggcaaucucuuucuuggcagguuuauggcuuuuaaguugaaucauauaucccaacaacauuuauugauauaucauucccuauauaacuugccaaaggagaguugcccua	110	Chr1:4365145..4365255:-	-40.16
	novel_79	34	17	35	64	48	15	uguguucucaggucaccccuc	21	gaggagugagccagagaacaca	22	gaggagugagccagagaacacaauuggauuuggaguuugcccaauugauuuuauuugggauugagauuaauucaaaaugcuguuuguguucucaggucaccccuc	105	Chr5:31101904..31102009:+	-38.3
	novel_80	73	36	54	32	55	12	aagccaaggaugaauugccgg	21	ggcaauuccauucuuggcuaag	22	aagccaaggaugaauugccggcgauggaauacauuugauagcuuauuacuuuuaugauauaaucauugucuauagcuagcuucuucuuuguagccggcaauuccauucuuggcuaag	117	Chr11:13469231..13469348:+	-44.07
	novel_81	18	29	39	14	17	37	uucuuaaggucugaguuuauuuc	23	aaacaaaacucaaacuuuaaaag	23	uucuuaaggucugaguuuauuucaaucgaauacccaaauuucaaaauauuacaauuuuaccuuugacaucaaauaauuacuuucugucuuuggcauuaauauuuuucaauaauuuaaaauaauuaugaagugaaauuuuaaaauuaauuuuaauagugauggaaaagagugaaacucaaucaauacuaaagacugauagugaguauuuaguaaauaaaaaaugagguuaauuauaaguguaaaucauaaaauuuauucaucaaauugaaacaaaacucaaacuuuaaaag	290	Chr3:28808258..28808548:-	-52.5
	novel_83	25	45	30	26	25	49	uauaacggucuaaauucuaacuuu	24	aaguuagaauuuagccgagaugau	24	aaguuagaauuuagccgagaugauuuuaaaaguucaaauuuagucuuaugguuugauaaaaccucauaauaaucuccaugguuugauaaaauuuucauacauaguucuuaucauaguaacuauuuauaauggcuuuaucaaaccauagagguuaaagccuaauuauaacggucuaaauucuaacuuu	187	Chr4:18794537..18794724:+	-56.6
	novel_84	18	34	25	32	17	33	aauuuauggacuaaaagugauuuu	24	aauauuaauagcgcucaauaaau	23	aauuuauggacuaaaagugauuuuuuuaaucuuaauuauaaauuagaaaaauauuaauagcgcucaauaaau	72	Chr11:3983289..3983361:-	-6.7
	novel_86	24	19	25	40	31	34	auagucgcuuagaagacaaagagu	24	uuuuaagucuaaaguuugaucugu	24	auagucgcuuagaagacaaagaguaaaacacucguacauaguguuugucaacuucaaucgauguuucauuuuaagucuaaaguuugaucugu	92	Chr11:24214364..24214456:-	-16.3
	novel_87	31	15	13	44	24	3	uugagccgcgucaauaucucu	21	agguauugacgugucucaauu	21	agguauugacgugucucaauuugaaagguacaugguuaagaucaagaaagaaaaagaaaaauaaaaagaaaagauauuuuaggaaauuauuaauuguuuaggccguguguguuuucugauugagccgcgucaauaucucu	140	Chr2:10875682..10875822:-	-40.71
	novel_88	31	17	20	15	13	16	agggacuagugacuagcaaccacu	24	ugguuguggaucacuaauccuugu	24	ugguuguggaucacuaauccuuguuguucauugucgaucgccagucuccaaucuugguuguuggucacaauacucaauuaccaauugucaacugucaaucuaagucccuacucgaguucguuggucucuaaucucaaucccuaaugaucagugggcaacgauuaggacuaaagauuagugaucaacgaucaagaccaaagaccaauaacuagugacuggcauuaaggacaauagauagggaccaaauaaccaacgaucgugacaagggacuagugacuagcaaccacu	288	Chr11:12005285..12005573:+	-92.16
	novel_9	1471	900	1017	1714	1478	831	uuggacugaagggagcuccuc	21	agagcuuccuucagcccacuc	21	agagcuuccuucagcccacucauggagggauucaaagggguugcugaaguaacugccgacucauucacucaaacacucaguagaacucaaaaagaaaccccaagaaaagaagaaaaagaagacuuaaaguauauucuuuuccucuacugugauugugugaaugaagcgggagauauuuugcacucucucuuuuucuuugcuuggacugaagggagcuccuc	221	Chr7:6929675..6929896:-	-79.95
	novel_91	17	15	17	15	16	13	aauaaauuuagaaguagaaugagu	24	cuucuucuacgucuaaauuuu	21	aauaaauuuagaaguagaaugaguauuuuaaaauaaaaguuuuuaauuuuuaaaaauuaaggcuauaaaaacuucuucuacgucuaaauuuu	92	Chr3:4803085..4803177:-	-20.44
	novel_92	19	8	13	14	13	3	ucccacagcuuucuugaacuu	21	uucaagaaagcuguggaaaagc	22	ucccacagcuuucuugaacuuccaaaguuucuguaguuuaaaaaaauuuauugcuaaucucuagaagagauuuugcaaacaaaugagauugagaagaagaagaagaagaagaagagcaagaaaguucaagaaagcuguggaaaagc	146	Chr11:23751558..23751704:+	-45.1
	novel_93	21	17	21	8	18	11	uuaguguucuacgcuguuaagagu	24	uuuuuuagagacgauauauuga	22	uuaguguucuacgcuguuaagaguuugaagaguauaaacaaaguucuacauuaauuaggaacgggagagauucaugauaugguauauaagugagaacaauuauuuuaguuugagaauuuuaaguaauuauauugugagauuuuucaaacuaugcuuugaacggauaaaaaaaagguaaaguaaauuugccauauuauccuuuauccaaacuccuuuuguacauaauugauaagauucuuguagacuuuuuuuagagacgauauauuga	268	Chr9:6446715..6446983:-	-55.14
	novel_94	13	10	6	14	18	18	ucgaucuucgacucuugauguugu	24	aauauggaugguggggauuaaacc	24	ucgaucuucgacucuugauguuguuaauuuuuuuauauauauauauuuaaaaaaaaaauaaaaggaaaaaacccaauuguuguauuauugaaggguaggaaaaaaagucuuuaucaaguuuuucuccgauuucaaacgaagguaauggagagaaaagguugaauuucaauuuaagagacuaauaacuugucaaaaguuggccacacacccuggauuuuuuuguugcaaacuaaauaaaaauaguuuuuuuuuuucccuuuuugacaaauauggaugguggggauuaaacc	290	Chr9:8894331..8894621:+	-60
	novel_95	17	5	8	8	8	3	ugaaguguuugggggaacucu	21	guucccuuccaagcacuucaga	22	guucccuuccaagcacuucagaaggaacaaacacaaaauuuugugaugcagcuuccagcugaaguguuugggggaacucu	80	Chr9:32749729..32749809:-	-37.2
	novel_98	161	150	135	201	155	112	agacugaugaucucacaaucacuc	24	gugauugugagaucaucagucuug	24	gugauugugagaucaucagucuugcuucucauucucgugccucacaaauacgucuugcuugucguucucguucucguuucacaccagacacacguaaaugagaacaagaacgagaacgagaauguggaacgagaacgacgagcgagacguauuugugagacacgagaaugagaagcaagacugaugaucucacaaucacuc	201	Chr1:16363710..16363911:-	-138

## Sheet: Table S6
	Table S6 Detailed information of DEGs
	Down or Up mRNA	aDown or Up protein	Gene ID	Location	ms FPKM	mf FPKM	log2(FC)	p-value	q-value	Description in watermelon V1	Best hit ID in Arabidopsis	Identity(%)	e-value	Ara_ref	Description in Arabidopsis V11	Description of Pfam V32
	Down		Cla015297	Chr9:2696399_2697478(+)	3.54929	22.1273	-2.64022	0.00030502	0.0129433	4-coumarate CoA ligase (AHRD V1 ***- Q5S017_BETPL); contains Interpro domain(s) IPR000873 AMP-dependent synthetase and ligase	AT1G51680	62.58	4e-131	At4CL1	4-coumarate:CoA ligase 1;4-coumarate:CoA ligase 1;4-coumarate:CoA ligase 1	AMP-binding AMP-binding enzyme
	Down		Cla015295	Chr9:2706281_2707909(+)	1.96307	17.3204	-3.14129	0.00308966	0.0239389	4-coumarate CoA ligase (AHRD V1 ***- Q5S017_BETPL); contains Interpro domain(s) IPR000873 AMP-dependent synthetase and ligase	AT3G21240	69.02	0	At4CL2	4-coumarate:CoA ligase 2;4-coumarate:CoA ligase 1;4-coumarate:CoA ligase 1	AMP-binding AMP-binding enzyme; AMP-binding_C AMP-binding enzyme C-terminal domain
	Down	Down	Cla015296	Chr9:2697492_2698038(+)	3.56827	35.8573	-3.32897	0.000233085	0.012665	4-coumarate CoA ligase (AHRD V1 ***- D1LZD3_EUCCA); contains Interpro domain(s) IPR000873 AMP-dependent synthetase and ligase	AT3G21240	68.71	7e-70	At4CL2	4-coumarate:CoA ligase 2;4-coumarate:CoA ligase 5;4-coumarate:CoA ligase 3	AMP-binding_C AMP-binding enzyme C-terminal domain; AMP-binding AMP-binding enzyme
	Down	Down	Cla015298	Chr9:2689335_2691078(+)	7.17852	30.0057	-2.06348	0.00101321	0.0168177	4-Coumarate CoA ligase (AHRD V1 ***- B2Z6P0_POPTR); contains Interpro domain(s) IPR000873 AMP-dependent synthetase and ligase	AT3G21240	67.72	0	At4CL2	4-coumarate:CoA ligase 2;4-coumarate:CoA ligase 1;4-coumarate:CoA ligase 1	AMP-binding AMP-binding enzyme; AMP-binding_C AMP-binding enzyme C-terminal domain
	Down	Down	Cla017226	Chr10:18436904_18441179(-)	7.30827	14.8942	-1.02715	0.00364556	0.0256922	4-coumarate CoA ligase (AHRD V1 ***- C0KKW5_HUMLU); contains Interpro domain(s) IPR000873 AMP-dependent synthetase and ligase	AT3G21240	73.19	0	At4CL2	4-coumarate:CoA ligase 2;4-coumarate:CoA ligase 1;4-coumarate:CoA ligase 3	AMP-binding AMP-binding enzyme; AMP-binding_C AMP-binding enzyme C-terminal domain
	Down	Down	Cla018820	Chr6:22429997_22434041(-)	4.46768	44.9921	-3.33207	0.000623645	0.0147786	4-coumarate coA ligase 2 (AHRD V1 ***- Q9LL50_RUBID); contains Interpro domain(s) IPR000873 AMP-dependent synthetase and ligase	AT3G21240	65.93	0	At4CL2	4-coumarate:CoA ligase 2;4-coumarate:CoA ligase 1;4-coumarate:CoA ligase 3	AMP-binding AMP-binding enzyme; AMP-binding_C AMP-binding enzyme C-terminal domain
	Up		Cla009109	Chr1:22585118_22586708(+)	28.9322	11.904	1.28124	0.00352816	0.0254216	Acyl-CoA synthetase (AHRD V1 **-- D0CV95_9RHOB); contains Interpro domain(s) IPR000873 AMP-dependent synthetase and ligase	AT5G16370	68.42	6e-35	AtAAE5	acyl activating enzyme 5;AMP-dependent synthetase and ligase family protein;AMP-dependent synthetase and ligase family protein	AMP-binding AMP-binding enzyme; AMP-binding_C AMP-binding enzyme C-terminal domain
	Down		Cla019545	Chr3:6733751_6735781(+)	0.128773	2.28291	-4.14797	0.00436086	0.0274355	Aromatic L-amino acid decarboxylase (AHRD V1 **** A6BM85_ROSHC); contains Interpro domain(s) IPR002129 Pyridoxal phosphate-dependent decarboxylase	AT2G20340	53.51	0	AtAAS	Pyridoxal phosphate (PLP)-dependent transferases superfamily protein;L-tyrosine decarboxylase;L-tyrosine decarboxylase	Pyridoxal_deC Pyridoxal-dependent decarboxylase conserved domain
	Down	Down	Cla022993	Chr11:16267793_16277130(-)	13.5251	31.5314	-1.22115	0.00235461	0.0220289	ABC-1 domain protein (AHRD V1 *--- D0LZ41_HALO1); contains Interpro domain(s) IPR001466 Beta-lactamase-related	AT5G24810	63.96	0	AtABC1K11	ABC1 family protein;ABC1 family protein;Protein kinase superfamily protein	Beta-lactamase Beta-lactamase; ABC1 ABC1 family
	Down	Down	Cla009733	Chr1:32455714_32462493(+)	4.94725	52.3663	-3.40394	0.000600066	0.0145533	Lipid A export ATP-binding/permease protein MsbA (AHRD V1 *--- MSBA_SYNAS); contains Interpro domain(s) IPR003439 ABC transporter-like	AT4G18050	72.36	0	AtABCB9	P-glycoprotein 9;P-glycoprotein 9;P-glycoprotein 7	ABC_membrane ABC transporter transmembrane region; ABC_tran ABC transporter; SMC_N RecF/RecN/SMC N terminal domain; AAA_16 AAA ATPase domain; AAA_29 P-loop containing region of AAA domain; ABC_ATPase Predicted ATPase of the ABC class; AAA_22 AAA domain; RsgA_GTPase RsgA GTPase
	Down		Cla004220	Chr5:8825572_8831494(-)	1.69282	4.52769	-1.41935	0.00608577	0.0312599	Multidrug resistance protein ABC transporter family (AHRD V1 **-- B9GX56_POPTR); contains Interpro domain(s) IPR001140 ABC transporter, transmembrane region	AT3G59140	64.85	0	AtABCC10	multidrug resistance-associated protein 14;multidrug resistance-associated protein 5;multidrug resistance-associated protein 6	ABC_tran ABC transporter; ABC_membrane ABC transporter transmembrane region; SMC_N RecF/RecN/SMC N terminal domain; AAA_29 P-loop containing region of AAA domain; AAA_21 AAA domain, putative AbiEii toxin, Type IV TA system; MMR_HSR1 50S ribosome-binding GTPase
	Down		Cla015591	Chr9:189111_194311(-)	1.23788	4.49482	-1.86039	0.00311965	0.0240525	Multidrug resistance protein ABC transporter family (AHRD V1 **-- B9IBC8_POPTR); contains Interpro domain(s) IPR003439 ABC transporter-like	AT3G21250	65.52	0	AtABCC8	multidrug resistance-associated protein 6;multidrug resistance-associated protein 6;multidrug resistance-associated protein 6	ABC_tran ABC transporter; ABC_membrane ABC transporter transmembrane region; SMC_N RecF/RecN/SMC N terminal domain; AAA_21 AAA domain, putative AbiEii toxin, Type IV TA system; AAA_29 P-loop containing region of AAA domain; MMR_HSR1 50S ribosome-binding GTPase
	Down		Cla016266	Chr9:10498452_10500017(+)	1.49209	8.16982	-2.45297	0.00563358	0.0302565	ABC transporter G family member 10 (AHRD V1 ***- AB10G_ARATH); contains Interpro domain(s) IPR013525 ABC-2 type transporter	AT1G53270	56.6	0	AtABCG10	ABC-2 type transporter family protein;ABC-2 type transporter family protein;ABC-2 type transporter family protein	ABC2_membrane ABC-2 type transporter; ABC_tran ABC transporter
	Down	Down	Cla004710	Chr9:32362067_32364437(-)	8.42274	73.8398	-3.13204	0.000104712	0.0103379	ABC transporter G family member 9 (AHRD V1 ***- F4JIV3_ARATH); contains Interpro domain(s) IPR013525 ABC-2 type transporter	AT3G55090	74.28	0	AtABCG16	ABC-2 type transporter family protein;ABC-2 type transporter family protein;ABC-2 type transporter family protein	ABC2_membrane ABC-2 type transporter; ABC_tran ABC transporter; AAA_29 P-loop containing region of AAA domain
	Down		Cla017863	Chr10:26805261_26808777(-)	0.0853767	14.0591	-7.36345	0.00013213	0.0107871	ABC transporter G family member 9 (AHRD V1 ***- F4JIV3_ARATH); contains Interpro domain(s) IPR013525 ABC-2 type transporter	AT2G37360	68.43	0	AtABCG2	ABC-2 type transporter family protein;ABC-2 type transporter family protein;ABC-2 type transporter family protein	ABC2_membrane ABC-2 type transporter; ABC_tran ABC transporter; AAA_29 P-loop containing region of AAA domain
	Down	Down	Cla004479	Chr10:4308777_4313012(-)	3.21518	182.424	-5.82626	0.0100961	0.0395489	ABC transporter G family member 27 (AHRD V1 **-- F4J6W2_ARATH); contains Interpro domain(s) IPR013525 ABC-2 type transporter	AT3G13220	68.76	0	AtABCG26	ABC-2 type transporter family protein;ABC transporter G family member 27;ABC-2 type transporter family protein	ABC2_membrane ABC-2 type transporter; ABC_tran ABC transporter; ABC2_membrane_3 ABC-2 family transporter protein
	Up	Down	Cla013360	Chr2:30022636_30036369(-)	4.82738	2.19854	1.13469	0.000701349	0.0152975	ABC transporter G family member 29 (AHRD V1 ***- F4J1I6_ARATH); contains Interpro domain(s) IPR013525 ABC-2 type transporter	AT2G29940	67.46	0	AtABCG31	pleiotropic drug resistance 3;pleiotropic drug resistance 1;pleiotropic drug resistance 1	ABC2_membrane ABC-2 type transporter; ABC_tran ABC transporter; PDR_assoc Plant PDR ABC transporter associated; ABC_trans_N ABC-transporter N-terminal; AAA_21 AAA domain, putative AbiEii toxin, Type IV TA system
	Down		Cla016894	Chr11:25816102_25834568(+)	0.266634	6.82699	-4.67832	0.00281469	0.0235296	ABC transporter G family member 43 (AHRD V1 ***- F4JJF5_ARATH); contains Interpro domain(s) IPR013525 ABC-2 type transporter	AT3G53480	65.92	0	AtABCG37	pleiotropic drug resistance 9;pleiotropic drug resistance 5;pleiotropic drug resistance 5	ABC2_membrane ABC-2 type transporter; ABC_tran ABC transporter; PDR_assoc Plant PDR ABC transporter associated; AAA_21 AAA domain, putative AbiEii toxin, Type IV TA system; ABC2_membrane_3 ABC-2 family transporter protein; RsgA_GTPase RsgA GTPase; AAA ATPase family associated with various cellular activities (AAA); AAA_16 AAA ATPase domain; AAA_18 AAA domain; Rad17 Rad17 P-loop domain
	Down		Cla017483	Chr10:23053826_23072542(-)	1.43096	5.38818	-1.91282	0.000705352	0.0152975	ABC transporter G family member 42 (AHRD V1 ***- F4JJF3_ARATH); contains Interpro domain(s) IPR013525 ABC-2 type transporter	AT3G53480	24.68	8e-37	AtABCG37	pleiotropic drug resistance 9;pleiotropic drug resistance 5;pleiotropic drug resistance 5	ABC2_membrane ABC-2 type transporter; ABC_tran ABC transporter; PDR_assoc Plant PDR ABC transporter associated; AAA_21 AAA domain, putative AbiEii toxin, Type IV TA system; AAA_16 AAA ATPase domain; RsgA_GTPase RsgA GTPase; AAA_25 AAA domain; AAA ATPase family associated with various cellular activities (AAA); AAA_18 AAA domain; Rad17 Rad17 P-loop domain; AAA_29 P-loop containing region of AAA do…
	Down		Cla012974	Chr9:22060122_22068738(-)	5.67179	16.0581	-1.50143	0.0103679	0.0401592	ABC transporter G family member 29 (AHRD V1 ***- F4J1I6_ARATH); contains Interpro domain(s) IPR013525 ABC-2 type transporter	AT1G15520	68.43	0	AtABCG40	pleiotropic drug resistance 12;pleiotropic drug resistance 12;pleiotropic drug resistance 6	ABC2_membrane ABC-2 type transporter; ABC_tran ABC transporter; PDR_assoc Plant PDR ABC transporter associated; ABC_trans_N ABC-transporter N-terminal; AAA_16 AAA ATPase domain; AAA_21 AAA domain, putative AbiEii toxin, Type IV TA system
	Down		Cla011764	Chr7:10482098_10485344(+)	1.43802	68.8325	-5.58093	7.2e-05	0.00984754	ABC transporter G family member 9 (AHRD V1 ***- F4JIV3_ARATH); contains Interpro domain(s) IPR013525 ABC-2 type transporter	AT4G27420	60.42	0	AtABCG9	ABC-2 type transporter family protein;ATP-binding cassette 14;ABC-2 type transporter family protein	ABC2_membrane ABC-2 type transporter; ABC_tran ABC transporter; AAA_21 AAA domain, putative AbiEii toxin, Type IV TA system
	Up		Cla011267	Chr3:26947948_26951162(-)	140.816	63.8899	1.14015	0.000903576	0.0162687	Catalytic/ protein phosphatase type 2C/ protein serine/threonine phosphatase (AHRD V1 **** B6TEB8_MAIZE); contains Interpro domain(s) IPR015655 Protein phosphatase 2C	AT4G26080	43.78	1e-91	AtABI1	Protein phosphatase 2C family protein;HYPERSENSITIVE TO ABA1;HYPERSENSITIVE TO ABA1	PP2C Protein phosphatase 2C
	Up		Cla014800	Chr9:6128716_6132283(-)	5.96149	2.74737	1.11762	0.0133575	0.0457512	Calcium-transporting ATPase 1 (AHRD V1 ***- Q7XBH9_CERRI); contains Interpro domain(s) IPR006408 ATPase, P-type, calcium-transporting, PMCA-type	AT3G63380	69.02	0	AtACA12	ATPase E1-E2 type family protein / haloacid dehalogenase-like hydrolase family protein;ATPase E1-E2 type family protein / haloacid dehalogenase-like hydrolase family protein;autoinhibited Ca(2+)-ATPase 10	Cation_ATPase_C Cation transporting ATPase, C-terminus; E1-E2_ATPase E1-E2 ATPase; Hydrolase haloacid dehalogenase-like hydrolase; Cation_ATPase Cation transport ATPase (P-type); Cation_ATPase_N Cation transporter/ATPase, N-terminus
	Down		Cla017784	Chr10:26112047_26116526(-)	0.0404167	3.46594	-6.42215	0.000490375	0.0138562	Carbonic anhydrase (AHRD V1 ***- B4G0V7_MAIZE); contains Interpro domain(s) IPR018340 Carbonic anhydrase, CAH1-like IPR001148 Carbonic anhydrase, alpha-class, catalytic domain	AT1G08080	42.44	1e-71	AtACA7	alpha carbonic anhydrase 7;alpha carbonic anhydrase 2;alpha carbonic anhydrase 4	Carb_anhydrase Eukaryotic-type carbonic anhydrase
	Down		Cla015696	Chr2:2690604_2692989(+)	43.6163	108	-1.3081	0.00260445	0.0228315	3-ketoacyl-CoA thiolase (AHRD V1 ***- FADA_MARAV); contains Interpro domain(s) IPR002155 Thiolase	AT5G48230	87.21	0	AtACAT2	acetoacetyl-CoA thiolase 2;acetoacetyl-CoA thiolase 2;Thiolase family protein	Thiolase_N Thiolase, N-terminal domain; Thiolase_C Thiolase, C-terminal domain
	Down		Cla002148	Chr3:12066429_12080055(+)	64.81	156.498	-1.27185	0.00109052	0.0171765	Acetyl-CoA carboxylase 3 (AHRD V1 ***- E6Y6S4_ARAHY); contains Interpro domain(s) IPR013537 Acetyl-CoA carboxylase, central region	AT1G36160	80.81	0	AtACC1	acetyl-CoA carboxylase 1;acetyl-CoA carboxylase 1;acetyl-CoA carboxylase 2	ACC_central Acetyl-CoA carboxylase, central region; Carboxyl_trans Carboxyl transferase domain; CPSase_L_D2 Carbamoyl-phosphate synthase L chain, ATP binding domain; Biotin_carb_N Biotin carboxylase, N-terminal domain; Biotin_carb_C Biotin carboxylase C-terminal domain; ATP-grasp_3 ATP-grasp domain; Biotin_lipoyl Biotin-requiring enzyme; ATP-grasp ATP-grasp domain
	Down		Cla016853	Chr11:25452724_25455339(-)	3.18329	6.90563	-1.11725	0.00894092	0.0376588	Spermidine synthase (AHRD V1 ***- A4RYD8_OSTLU); contains Interpro domain(s) IPR001045 Spermine synthase	AT5G19530	65.67	8e-149	AtACL5	S-adenosyl-L-methionine-dependent methyltransferases superfamily protein;S-adenosyl-L-methionine-dependent methyltransferases superfamily protein;spermidine synthase	Spermine_synth Spermine/spermidine synthase domain; Spermine_synt_N Spermidine synthase tetramerisation domain
	Down	Down	Cla000809	Chr0:18973652_18979979(+)	35.71	98.1962	-1.45934	0.00078401	0.015599	Succinyl-CoA ligase (AHRD V1 *--* SUCC_STAES); contains Interpro domain(s) IPR016102 Succinyl-CoA synthetase-like	AT1G10670	88.29	0	AtACLA-1	ATP-citrate lyase A-1;ATP-citrate lyase A-1;ATP-citrate lyase A-1	Citrate_bind ATP citrate lyase citrate-binding; ATP-grasp_2 ATP-grasp domain
	Down		Cla016825	Chr11:25220363_25222692(+)	0.172905	4.6386	-4.74564	0.000741274	0.0155109	1-aminocyclopropane-1-carboxylate oxidase (AHRD V1 ***- Q6A1K7_SOLLC); contains Interpro domain(s) IPR005123 Oxoglutarate and iron-dependent oxygenase	AT2G19590	63.3	2e-144	AtACO1	ACC oxidase 1;ACC oxidase 1;ACC oxidase 2	2OG-FeII_Oxy 2OG-Fe(II) oxygenase superfamily; DIOX_N non-haem dioxygenase in morphine synthesis N-terminal
	Down	Down	Cla022956	Chr11:15917182_15919466(+)	33.6896	1997.18	-5.88952	0.0117913	0.0429186	4-coumarate CoA ligase-like (AHRD V1 ***- Q84K86_NICSY); contains Interpro domain(s) IPR000873 AMP-dependent synthetase and ligase	AT1G62940	73.12	0	AtACOS5	acyl-CoA synthetase 5;4-coumarate:CoA ligase 2;AMP-dependent synthetase and ligase family protein	AMP-binding AMP-binding enzyme; AMP-binding_C AMP-binding enzyme C-terminal domain
	Down	Down	Cla019842	Chr2:26618876_26621539(+)	8.87545	63.7404	-2.84432	0.000232255	0.012665	Acyl carrier protein (AHRD V1 **** Q944N0_OLEEU); contains Interpro domain(s) IPR003231 Acyl carrier protein (ACP)	AT4G25050	58.27	4e-41	AtACP4	acyl carrier protein 4;acyl carrier protein 4;acyl carrier protein 3	PP-binding Phosphopantetheine attachment site
	Down		Cla007147	Chr5:16614583_16623629(-)	13.5746	28.3848	-1.06421	0.00688141	0.0331106	Acetyl-coenzyme A synthetase 2 (AHRD V1 ***- E1QLV5_DESB2); contains Interpro domain(s) IPR011904 Acetate--CoA ligase	AT5G36880	80.26	0	AtACS	acetyl-CoA synthetase;acetyl-CoA synthetase;acetyl-CoA synthetase	AMP-binding AMP-binding enzyme; AMP-binding_C AMP-binding enzyme C-terminal domain; ACAS_N Acetyl-coenzyme A synthetase N-terminus
	Up		Cla011230	Chr3:26593864_26595583(-)	7.91842	0.470089	4.07421	0.00301444	0.0238424	1-aminocyclopropane-1-carboxylate synthase (AHRD V1 ***- A8ASI7_CUCSA); contains Interpro domain(s) IPR004839 Aminotransferase, class I and II	AT4G26200	74.54	0	AtACS7	1-amino-cyclopropane-1-carboxylate synthase 7;1-amino-cyclopropane-1-carboxylate synthase 8;1-aminocyclopropane-1-carboxylate synthase 4	Aminotran_1_2 Aminotransferase class I and II
	Down		Cla013304	Chr2:30527854_30529703(-)	6.76331	13.9959	-1.0492	0.00108335	0.0171644	Actin (AHRD V1 ***- F1CFB3_CAMSI); contains Interpro domain(s) IPR004000 Actin/actin-like	AT3G12110	96.55	0	AtACT11	actin-11;actin 3;actin 3	Actin Actin
	Down		Cla015308	Chr9:2595158_2601422(-)	4.35392	37.8283	-3.11908	0.00557921	0.0301345	AP2-like ethylene-responsive transcription factor (AHRD V1 **** A8MQS2_ARATH); contains Interpro domain(s) IPR001471 Pathogenesis-related transcriptional factor and ERF, DNA-binding	AT1G16060	61.03	1e-106	AtADAP	ARIA-interacting double AP2 domain protein;Integrase-type DNA-binding superfamily protein;Integrase-type DNA-binding superfamily protein	AP2 AP2 domain
	Up		Cla007853	Chr2:1955638_1956791(+)	23.1706	8.71124	1.41134	0.00627044	0.0317642	NAC domain protein IPR003441 (AHRD V1 ***- B9H4N3_POPTR); contains Interpro domain(s) IPR003441 No apical meristem (NAM) protein	AT1G01720	55	3e-101	ATAF1	NAC (No Apical Meristem) domain transcriptional regulator superfamily protein;NAC (No Apical Meristem) domain transcriptional regulator superfamily protein;NAC domain containing protein 102	NAM No apical meristem (NAM) protein
	Up		Cla013922	Chr8:14908050_14909118(-)	34.0176	12.0585	1.49623	0.0152215	0.0490768	NAC domain protein (AHRD V1 ***- B2ZGQ4_SOYBN); contains Interpro domain(s) IPR003441 No apical meristem (NAM) protein	AT1G01720	67.76	9e-140	ATAF1	NAC (No Apical Meristem) domain transcriptional regulator superfamily protein;NAC domain containing protein 32;NAC (No Apical Meristem) domain transcriptional regulator superfamily protein	NAM No apical meristem (NAM) protein
	Up		Cla006944	Chr6:234594_245681(-)	11.879	5.4813	1.11583	0.00821574	0.036138	MADS box transcription factor 5 (AHRD V1 ***- A5X6G6_POPTO); contains Interpro domain(s) IPR002100 Transcription factor, MADS-box	AT2G45660	66.67	2e-83	AtAGL20	AGAMOUS-like 20;AGAMOUS-like 20;AGAMOUS-like 19	SRF-TF SRF-type transcription factor (DNA-binding and dimerisation domain); K-box K-box region
	Down		Cla011387	Chr1:1824364_1824675(+)	0.421628	2.59696	-2.62278	0.00746291	0.0343972	Arabinogalactan peptide 20 (AHRD V1 *-*- AGP20_ARATH); contains Interpro domain(s) IPR009424 Protein of unknown function DUF1070	AT2G46330	71.43	8e-14	AtAGP16	arabinogalactan protein 16;arabinogalactan protein 20;arabinogalactan protein 22	AGP Arabinogalactan peptide
	Up		Cla016762	Chr11:24601538_24602427(-)	7.99737	3.49002	1.19629	0.00499328	0.0288376	Unknown Protein (AHRD V1); contains Interpro domain(s) IPR009424 Protein of unknown function DUF1070	AT5G53250	48.44	5e-13	AtAGP22	arabinogalactan protein 22;arabinogalactan protein 16;arabinogalactan protein 20	AGP Arabinogalactan peptide
	Down		Cla021915	Chr8:18542151_18545159(+)	15.037	32.4173	-1.10825	0.002839	0.0235743	AT hook motif DNA-binding family protein (AHRD V1 *-** O22812_ARATH); contains Interpro domain(s) IPR005175 Protein of unknown function DUF296	AT2G33620	52.38	5e-90	AtAHL10	AT hook motif DNA-binding family protein;AT hook motif DNA-binding family protein;AT hook motif DNA-binding family protein	DUF296 Plants and Prokaryotes Conserved (PCC) domain
	Down		Cla006953	Chr6:315844_316683(-)	0.0811853	2.50031	-4.94475	0.0122455	0.0437569	AT-hook DNA-binding protein (Fragment) (AHRD V1 *--- A1DR81_CATRO); contains Interpro domain(s) IPR014476 Predicted AT-hook DNA-binding	AT3G60870	54.64	3e-77	AtAHL18	AT-hook motif nuclear-localized protein 18;AT-hook motif nuclear-localized protein 22;Putative AT-hook DNA-binding family protein	DUF296 Plants and Prokaryotes Conserved (PCC) domain
	Up		Cla003993	Chr7:3429247_3430068(+)	10.503	2.1005	2.322	7.08e-05	0.00983825	AT-hook DNA-binding protein (Fragment) (AHRD V1 **-- A1DR81_CATRO); contains Interpro domain(s) IPR014476 Predicted AT-hook DNA-binding	AT4G14465	60.27	5e-70	AtAHL20	AT-hook motif nuclear-localized protein 20;Putative AT-hook DNA-binding family protein;Putative AT-hook DNA-binding family protein	DUF296 Plants and Prokaryotes Conserved (PCC) domain
	Down		Cla011527	Chr1:3398184_3399095(-)	0.0420817	2.70593	-6.00679	0.00085649	0.0161259	AT-hook DNA-binding protein (Fragment) (AHRD V1 *--- A1DR81_CATRO); contains Interpro domain(s) IPR014476 Predicted AT-hook DNA-binding	AT4G22810	55.18	8e-85	AtAHL24	Putative AT-hook DNA-binding family protein;Putative AT-hook DNA-binding family protein;AT-hook motif nuclear-localized protein 22	DUF296 Plants and Prokaryotes Conserved (PCC) domain
	Down	Down	Cla003561	Chr1:14491930_14492878(+)	144.473	402.894	-1.4796	0.000860653	0.0161538	Histidine phosphotransfer protein (AHRD V1 ***- B9HQV5_POPTR); contains Interpro domain(s) IPR008207 Signal transduction histidine kinase, phosphotransfer (Hpt) region	AT5G39340	28.68	5e-13	AtAHP3	histidine-containing phosphotransmitter 3;histidine-containing phosphotransmitter 3;histidine-containing phosphotransmitter 3	No hits detected that satisfy reporting thresholds
	Up		Cla005156	Chr3:28591763_28592392(+)	34.9758	14.9517	1.22604	0.00532776	0.0296692	Transcription factor (AHRD V1 ***- D7L4N5_ARALL)	AT1G09250	54.67	7e-40	AtAIF4	basic helix-loop-helix (bHLH) DNA-binding superfamily protein;sequence-specific DNA binding transcription factor;sequence-specific DNA binding transcription factor	No hits detected that satisfy reporting thresholds
	Down		Cla012580	Chr7:24194881_24198610(-)	3.55034	7.36975	-1.05366	0.00163298	0.0192365	AP2-like ethylene-responsive transcription factor At1g16060 (AHRD V1 *-** AP2L1_ARATH); contains Interpro domain(s) IPR001471 Pathogenesis-related transcriptional factor and ERF, DNA-binding	AT1G72570	52.49	4e-134	AtAIL1	Integrase-type DNA-binding superfamily protein;Integrase-type DNA-binding superfamily protein;AINTEGUMENTA-like 5	AP2 AP2 domain
	Down		Cla005659	Chr10:3220282_3220890(-)	10.6637	55.4274	-2.37789	0.000793311	0.015643	Cortical cell-delineating protein (AHRD V1 *--- B6UG74_MAIZE); contains Interpro domain(s) IPR013770 Plant lipid transfer protein and hydrophobic protein, helical	AT4G12550	71.76	6e-38	AtAIR1	Auxin-Induced in Root cultures 1;Bifunctional inhibitor/lipid-transfer protein/seed storage 2S albumin superfamily protein;Bifunctional inhibitor/lipid-transfer protein/seed storage 2S albumin superfamily protein	Hydrophob_seed Hydrophobic seed protein
	Up		Cla002600	Chr3:3720596_3721438(-)	10.7019	3.06457	1.8041	0.0113297	0.0420769	AtIII18x5-like protein (Fragment) (AHRD V1 *-*- D9YU68_ARAHA)	AT5G50360	46.33	6e-64	AtAITR5	von willebrand factor A domain protein;AtIII18x5-like protein;von willebrand factor A domain protein	No hits detected that satisfy reporting thresholds
	Down		Cla011179	Chr3:26003655_26008124(+)	1.01914	3.24935	-1.6728	0.000475636	0.0138562	PHD finger protein ALFIN-LIKE 3 (AHRD V1 *-*- ALFL3_ARATH)	AT3G42790	46.92	1e-22	AtAL3	alfin-like 3;alfin-like 5;alfin-like 5	Alfin Alfin
	Down	Down	Cla019804	Chr2:27107635_27111228(+)	39.0319	91.6063	-1.23079	0.000823289	0.0159286	Aldehyde dehydrogenase 1 (AHRD V1 ***- Q84V96_LOTCO); contains Interpro domain(s) IPR015590 Aldehyde dehydrogenase	AT3G48000	74.54	0	AtALDH2B4	aldehyde dehydrogenase 2B4;aldehyde dehydrogenase 2B7;aldehyde dehydrogenase 2B7	Aldedh Aldehyde dehydrogenase family
	Up		Cla017583	Chr10:24217308_24223988(-)	9.67206	4.79541	1.01217	0.00953168	0.0384861	Glutamate carboxypeptidase 2 (AHRD V1 **-- B6SP44_MAIZE); contains Interpro domain(s) IPR007365 Transferrin receptor-like, dimerisation	AT3G54720	57.18	0	AtAMP1	Peptidase M28 family protein;Peptidase M28 family protein;protease-associated (PA) domain-containing protein	TFR_dimer Transferrin receptor-like dimerisation domain; Peptidase_M28 Peptidase family M28; PA PA domain
	Down	Down	Cla015818	Chr2:3853199_3856235(-)	1.84761	291.749	-7.30292	0.00136965	0.0184079	BHLH transcription factor (AHRD V1 **-- Q84WX1_BRANA); contains Interpro domain(s) IPR001092 Basic helix-loop-helix dimerisation region bHLH	AT2G16910	45.86	4e-150	AtAMS	basic helix-loop-helix (bHLH) DNA-binding superfamily protein;basic helix-loop-helix (bHLH) DNA-binding superfamily protein;basic helix-loop-helix (bHLH) DNA-binding superfamily protein	bHLH-MYC_N bHLH-MYC and R2R3-MYB transcription factors N-terminal; HLH Helix-loop-helix DNA-binding domain
	Up		Cla021471	Chr5:3450906_3452408(-)	3.86961	0.73538	2.39563	0.000172251	0.011725	Ammonium transporter (AHRD V1 ***- B9HSW3_POPTR); contains Interpro domain(s) IPR001905 Ammonium transporter	AT4G13510	81.14	0	AtAMT1;1	ammonium transporter 1%3B1;ammonium transporter 1%3B3;ammonium transporter 1%3B5	Ammonium_transp Ammonium Transporter Family
	Up		Cla005937	Chr7:1522858_1525387(-)	7.79843	3.48553	1.16181	0.00294113	0.0237667	Ammonium transporter (AHRD V1 ***- B9GRB4_POPTR); contains Interpro domain(s) IPR001905 Ammonium transporter	AT1G64780	76.74	0	AtAMT1;2	ammonium transporter 1%3B2;ammonium transporter 1%3B1;ammonium transporter 1%3B4	Ammonium_transp Ammonium Transporter Family
	Up		Cla007535	Chr6:7124226_7128479(+)	5.13549	2.34648	1.13	0.0121842	0.0436524	Sulfate adenylyltransferase (AHRD V1 **-* Q43183_SOLTU); contains Interpro domain(s) IPR002650 ATP-sulfurylase	AT3G22890	79.53	0	AtAPS1	ATP sulfurylase 1;Pseudouridine synthase/archaeosine transglycosylase-like family protein;Pseudouridine synthase/archaeosine transglycosylase-like family protein	ATP-sulfurylase ATP-sulfurylase; PUA_2 PUA-like domain
	Up		Cla013254	Chr2:30982510_30986181(-)	101.121	30.0306	1.75158	0.000192712	0.0121788	Ascorbate peroxidase (AHRD V1 ***- Q1AFF4_9ROSI); contains Interpro domain(s) IPR010255 Haem peroxidase	AT1G07890	77.6	2e-145	AtAPX1	ascorbate peroxidase 1;ascorbate peroxidase 1;ascorbate peroxidase 1	peroxidase Peroxidase
	Down	Down	Cla013046	Chr5:10268124_10269617(-)	0.737331	114.22	-7.27528	5.85e-05	0.00976752	Blue copper protein (AHRD V1 **-- B6TT37_MAIZE); contains Interpro domain(s) IPR003245 Plastocyanin-like	AT2G02850	48.46	3e-37	AtARPN	plantacyanin;Cupredoxin superfamily protein;early nodulin-like protein 22	Cu_bind_like Plastocyanin-like domain
	Down		Cla013872	Chr8:15604889_15606296(-)	146.699	431.05	-1.555	0.00048559	0.0138562	Blue copper protein (AHRD V1 **-- B6U7P6_MAIZE); contains Interpro domain(s) IPR003245 Plastocyanin-like	AT2G02850	63.81	7e-47	AtARPN	plantacyanin;Cupredoxin superfamily protein;early nodulin-like protein 22	Cu_bind_like Plastocyanin-like domain
	Down		Cla022718	Chr8:25972141_25974926(-)	1.13082	3.97405	-1.81324	0.00156008	0.0190182	Response regulator (AHRD V1 ***- A1A6A7_ORYSJ); contains Interpro domain(s) IPR017053 Response regulator, plant B-type	AT1G67710	49.75	2e-137	AtARR11	response regulator 11;response regulator 11;response regulator 1	Response_reg Response regulator receiver domain; Myb_DNA-binding Myb-like DNA-binding domain
	Up		Cla017224	Chr10:18472416_18474976(-)	73.6108	18.0916	2.0246	0.00418203	0.0270217	Transcription regulatory protein SNF5 (AHRD V1 *-*- D3B6R9_POLPA)	AT2G24100	46.65	5e-123	AtASG1	ATP-dependent DNA helicase;ATP-dependent DNA helicase;hypothetical protein	No hits detected that satisfy reporting thresholds
	Down	Down	Cla013577	Chr2:27883646_27884796(-)	0.758685	25.2881	-5.05881	0.00386716	0.0263623	O-methyltransferase (AHRD V1 **** D9YKY4_VITVI); contains Interpro domain(s) IPR016461 O-methyltransferase, COMT, eukaryota	AT4G35160	40.75	2e-83	AtASMT	O-methyltransferase family protein;O-methyltransferase 1;O-methyltransferase family protein	Methyltransf_2 O-methyltransferase domain; Dimerisation Dimerisation domain
	Down		Cla013578	Chr2:27859150_27860300(-)	0.597067	15.3528	-4.68446	0.00533244	0.0296846	O-methyltransferase (AHRD V1 **** D9YKY4_VITVI); contains Interpro domain(s) IPR016461 O-methyltransferase, COMT, eukaryota	AT4G35160	40.75	7e-83	AtASMT	O-methyltransferase family protein;O-methyltransferase 1;O-methyltransferase family protein	Methyltransf_2 O-methyltransferase domain; Dimerisation Dimerisation domain
	Down		Cla015790	Chr2:3540115_3542455(-)	0.134266	2.96937	-4.467	5.95e-05	0.00976752	O-methyltransferase family 2 protein (AHRD V1 **** Q9T003_ARATH); contains Interpro domain(s) IPR016461 O-methyltransferase, COMT, eukaryota	AT4G35160	51.92	1e-105	AtASMT	O-methyltransferase family protein;O-methyltransferase family protein;O-methyltransferase 1	Methyltransf_2 O-methyltransferase domain; Dimerisation Dimerisation domain
	Up		Cla013371	Chr2:29954098_29957774(+)	125.307	30.909	2.01936	0.00162898	0.019227	Asparagine synthetase (AHRD V1 **** F6KDH5_MORAL); contains Interpro domain(s) IPR006426 Asparagine synthase, glutamine-hydrolyzing	AT3G47340	82.28	0	AtASN1	glutamine-dependent asparagine synthase 1;asparagine synthetase 3;asparagine synthetase 2	Asn_synthase Asparagine synthase; GATase_7 Glutamine amidotransferase domain; GATase_6 Glutamine amidotransferase domain; DUF3700 Aluminium induced protein
	Down	Down	Cla021970	Chr8:19183669_19187250(+)	3.66864	30.1052	-3.0367	0.00159416	0.0191231	Asparagine synthetase (AHRD V1 **** O65329_ELAUM); contains Interpro domain(s) IPR006426 Asparagine synthase, glutamine-hydrolyzing	AT3G47340	80.1	0	AtASN1	glutamine-dependent asparagine synthase 1;asparagine synthetase 3;asparagine synthetase 2	Asn_synthase Asparagine synthase; GATase_7 Glutamine amidotransferase domain; GATase_6 Glutamine amidotransferase domain; DUF3700 Aluminium induced protein
	Down		Cla008027	Chr4:1398066_1400614(+)	0.374646	67.8838	-7.50139	1.69e-05	0.00799755	Aspartyl protease-like protein (AHRD V1 **-- Q84M99_ARATH); contains Interpro domain(s) IPR001461 Peptidase A1	AT2G03200	61.74	0	AtASPR1	Eukaryotic aspartyl protease family protein;Eukaryotic aspartyl protease family protein;Eukaryotic aspartyl protease family protein	TAXi_N Xylanase inhibitor N-terminal; TAXi_C Xylanase inhibitor C-terminal; Asp Eukaryotic aspartyl protease
	Up		Cla022688	Chr8:25733835_25737707(+)	10.8852	1.91026	2.51052	0.00031791	0.0129433	HORMA domain containing protein expressed (AHRD V1 *-*- Q2QMF2_ORYSJ); contains Interpro domain(s) IPR003511 DNA-binding HORMA	AT1G67370	49.8	7e-134	AtASY1	DNA-binding HORMA family protein	HORMA HORMA domain
	Up		Cla019502	Chr3:5955649_5957665(+)	18.0966	7.48935	1.27281	0.00486178	0.0285157	Myosin-like protein (AHRD V1 ***- Q84Z40_ORYSJ)	AT2G33793	68.68	3e-84	AtASY4	DNA ligase-like protein;DNA ligase-like protein;DNA ligase-like protein	No hits detected that satisfy reporting thresholds
	Down		Cla004339	Chr7:4441149_4445630(+)	0.0800417	17.5115	-7.77334	0.000133135	0.0107871	Auxin transporter-like protein 1 (AHRD V1 ***- B6U1Y3_MAIZE); contains Interpro domain(s) IPR013057 Amino acid transporter, transmembrane	AT2G38120	81.78	0	AtAUX1	Transmembrane amino acid transporter family protein;like AUXIN RESISTANT 1;like AUXIN RESISTANT 2	Aa_trans Transmembrane amino acid transporter protein
	Down		Cla006581	Chr11:1689934_1695680(+)	0.823812	2.72306	-1.72484	5.07e-05	0.00976752	Auxin transporter-like protein 1 (AHRD V1 ***- B6U1Y3_MAIZE); contains Interpro domain(s) IPR013057 Amino acid transporter, transmembrane	AT2G38120	76.48	0	AtAUX1	Transmembrane amino acid transporter family protein;like AUXIN RESISTANT 1;like AUXIN RESISTANT 2	Aa_trans Transmembrane amino acid transporter protein
	Up		Cla003635	Chr1:5592851_5593542(+)	13.1265	5.30502	1.30705	0.00257826	0.0227832	Auxin responsive protein (AHRD V1 *-*- D9IQE6_CATRO); contains Interpro domain(s) IPR003311 AUX/IAA protein	AT5G43700	40.54	1e-26	ATAUX2-11	AUX/IAA transcriptional regulator family protein;AUX/IAA transcriptional regulator family protein;AUX/IAA transcriptional regulator family protein	AUX_IAA AUX/IAA family
	Up		Cla001334	Chr1:31132983_31136300(-)	11.2233	5.32142	1.07661	0.000716655	0.0154341	Receptor kinase 5 (AHRD V1 **** Q948X2_BRACM); contains Interpro domain(s) IPR002290 Serine/threonine protein kinase	AT4G21390	53.45	0	AtB120	S-locus lectin protein kinase family protein;S-locus lectin protein kinase family protein;S-locus lectin protein kinase family protein	Pkinase_Tyr Protein tyrosine kinase; Pkinase Protein kinase domain; B_lectin D-mannose binding lectin; S_locus_glycop S-locus glycoprotein domain; PAN_2 PAN-like domain; DUF3403 Domain of unknown function (DUF3403)
	Down		Cla016930	Chr11:26242616_26246485(+)	16.6125	43.8139	-1.39912	0.000661343	0.0150857	Aldo/keto reductase family protein (AHRD V1 ***- D7KWQ9_ARALL); contains Interpro domain(s) IPR001395 Aldo/keto reductase	AT1G60710	59.24	3e-138	ATB2	NAD(P)-linked oxidoreductase superfamily protein;NAD(P)-linked oxidoreductase superfamily protein;NAD(P)-linked oxidoreductase superfamily protein	Aldo_ket_red Aldo/keto reductase family
	Down		Cla021135	Chr5:685770_686144(+)	6.59559	22.6775	-1.78169	0.0112292	0.0418146	Receptor-like kinase (AHRD V1 ***- C0SW33_SOYBN); contains Interpro domain(s) IPR000719 Protein kinase, core	AT3G23750	59.79	1e-33	AtBARK1	No Hits	Pkinase Protein kinase domain; Pkinase_Tyr Protein tyrosine kinase
	Up		Cla009846	Chr1:33440734_33442329(-)	22.8808	10.8006	1.08302	0.00310012	0.0239389	FAD-binding domain-containing protein (AHRD V1 **-- D7MFH8_ARALL); contains Interpro domain(s) IPR006094 FAD linked oxidase, N-terminal	AT4G20840	66.34	0	ATBBE21	FAD-binding Berberine family protein;FAD-binding Berberine family protein;FAD-binding Berberine family protein	FAD_binding_4 FAD binding domain; BBE Berberine and berberine like
	Down		Cla005065	Chr3:2737704_2742793(-)	0.533287	2.75506	-2.3691	0.00180758	0.0200471	FAD-binding domain-containing protein (AHRD V1 **-* D7MMH8_ARALL); contains Interpro domain(s) IPR006094 FAD linked oxidase, N-terminal	AT5G44400	47.73	2e-159	ATBBE26	FAD-binding Berberine family protein;FAD-binding Berberine family protein;FAD-binding Berberine family protein	FAD_binding_4 FAD binding domain; BBE Berberine and berberine like
	Up		Cla001335	Chr1:31143448_31143825(+)	20.038	6.67315	1.5863	0.00713986	0.0336908	Zinc finger protein CONSTANS-LIKE 13 (AHRD V1 *-*- F4IM60_ARATH); contains Interpro domain(s) IPR000315 Zinc finger, B-box	AT5G54470	50	7e-26	AtBBX29	B-box type zinc finger family protein;B-box type zinc finger family protein;B-box type zinc finger family protein	No hits detected that satisfy reporting thresholds
	Down	Down	Cla022656	Chr8:25456800_25459304(-)	15.99	33.0256	-1.04641	0.000243363	0.012665	Branched-chain-amino-acid aminotransferase (AHRD V1 **** C6TLT9_SOYBN); contains Interpro domain(s) IPR005786 Branched-chain amino acid aminotransferase II	AT1G10070	69.41	0	AtBCAT-2	branched-chain amino acid transaminase 2;branched-chain amino acid transaminase 2;branched-chain amino acid transaminase 2	Aminotran_4 Amino-transferase class IV
	Down		Cla015362	Chr9:2157345_2158175(+)	0.0308143	3.41302	-6.7913	0.00772053	0.0351182	Blue copper protein (Fragment) (AHRD V1 *--- O82576_MAIZE); contains Interpro domain(s) IPR003245 Plastocyanin-like	AT5G20230	46.72	6e-30	AtBCB	blue-copper-binding protein;Cupredoxin superfamily protein;early nodulin-like protein 9	Cu_bind_like Plastocyanin-like domain
	Up		Cla018968	Chr6:23949187_23950831(+)	10.3149	3.00651	1.77856	0.00259712	0.0228271	Transcription factor (AHRD V1 *-*- D6MKM4_9ASPA); contains Interpro domain(s) IPR011598 Helix-loop-helix DNA-binding	AT1G73830	52.81	2e-66	AtBEE3	BR enhanced expression 3;BR enhanced expression 3;BR enhanced expression 1	No hits detected that satisfy reporting thresholds
	Down	Down	Cla011559	Chr1:3802250_3805088(-)	3.70075	11.1032	-1.58509	0.013033	0.0451723	Acid beta-fructofuranosidase (AHRD V1 **-- Q575T1_WHEAT); contains Interpro domain(s) IPR001362 Glycoside hydrolase, family 32	AT1G12240	65.11	0	ATBETAFRUCT4	Glycosyl hydrolases family 32 protein;Glycosyl hydrolases family 32 protein;Glycosyl hydrolases family 32 protein	Glyco_hydro_32N Glycosyl hydrolases family 32 N-terminal domain; Glyco_hydro_32C Glycosyl hydrolases family 32 C terminal; DUF3357 Domain of unknown function (DUF3357)
	Down	Down	Cla016591	Chr11:22958718_22965716(+)	0.310647	24.7052	-6.31339	1.96e-05	0.00863776	Beta-galactosidase (AHRD V1 ***- F6I1A6_VITVI); contains Interpro domain(s) IPR001944 Glycoside hydrolase, family 35	AT4G36360	65.52	0	AtBGAL3	beta-galactosidase 3;beta-galactosidase 3;beta galactosidase 1	Glyco_hydro_35 Glycosyl hydrolases family 35; GHD Beta-sandwich domain in beta galactosidase; Gal_Lectin Galactose binding lectin domain; Glyco_hydro_42 Beta-galactosidase; BetaGal_dom4_5 Beta-galactosidase jelly roll domain
	Down	Down	Cla011141	Chr3:25675625_25678507(-)	0.591428	20.247	-5.09736	0.000887878	0.0161604	Beta-galactosidase (AHRD V1 ***- B9GM20_POPTR); contains Interpro domain(s) IPR001944 Glycoside hydrolase, family 35	AT5G20710	63.95	0	AtBGAL7	beta-galactosidase 7;beta-galactosidase 15;beta-galactosidase 7	Glyco_hydro_35 Glycosyl hydrolases family 35; GHD Beta-sandwich domain in beta galactosidase; Gal_Lectin Galactose binding lectin domain; Glyco_hydro_42 Beta-galactosidase; BetaGal_dom4_5 Beta-galactosidase jelly roll domain
	Down	Down	Cla021636	Chr5:4822711_4826763(+)	0.039466	17.401	-8.78435	0.00072893	0.0155109	Beta-galactosidase (AHRD V1 ***- B9RR87_RICCO); contains Interpro domain(s) IPR001944 Glycoside hydrolase, family 35	AT5G20710	55.21	0	AtBGAL7	beta-galactosidase 7;beta-galactosidase 15;beta-galactosidase 8	Glyco_hydro_35 Glycosyl hydrolases family 35; GHD Beta-sandwich domain in beta galactosidase; Gal_Lectin Galactose binding lectin domain; Glyco_hydro_42 Beta-galactosidase
	Up		Cla000032	Chr0:9263939_9266653(+)	33.7177	6.93841	2.28083	0.000198019	0.0122767	Beta-D-glucosidase (AHRD V1 ***- Q7XAS3_GOSHI); contains Interpro domain(s) IPR001764 Glycoside hydrolase, family 3, N-terminal	AT5G20950	73.95	0	AtBGLC1	Glycosyl hydrolase family protein;Glycosyl hydrolase family protein;Glycosyl hydrolase family protein	Glyco_hydro_3 Glycosyl hydrolase family 3 N terminal domain; Glyco_hydro_3_C Glycosyl hydrolase family 3 C-terminal domain
	Down	Down	Cla020462	Chr5:29644603_29649528(-)	12.6846	29.9038	-1.23725	0.00027444	0.0127083	Beta-D-glucosidase (AHRD V1 ***- Q7XAS3_GOSHI); contains Interpro domain(s) IPR001764 Glycoside hydrolase, family 3, N-terminal	AT5G04885	69.45	0	AtBGLC3	Glycosyl hydrolase family protein;Glycosyl hydrolase family protein;Glycosyl hydrolase family protein	Glyco_hydro_3 Glycosyl hydrolase family 3 N terminal domain; Glyco_hydro_3_C Glycosyl hydrolase family 3 C-terminal domain
	Down		Cla010576	Chr6:10388277_10391107(-)	14.3162	55.9207	-1.96574	0.000522161	0.0139787	BHLH transcription factor (AHRD V1 *-*- Q84WX1_BRANA); contains Interpro domain(s) IPR011598 Helix-loop-helix DNA-binding	AT2G31210	44.44	1e-82	AtbHLH091	basic helix-loop-helix (bHLH) DNA-binding superfamily protein;basic helix-loop-helix (bHLH) DNA-binding superfamily protein;basic helix-loop-helix (bHLH) DNA-binding superfamily protein	HLH Helix-loop-helix DNA-binding domain
	Down		Cla019871	Chr2:26323618_26325003(+)	23.6766	71.3427	-1.59131	0.0035919	0.0256066	BHLH transcription factor (AHRD V1 ***- Q8H7N8_ORYSJ); contains Interpro domain(s) IPR011598 Helix-loop-helix DNA-binding	AT1G72210	42.11	3e-74	AtBHLH096	basic helix-loop-helix (bHLH) DNA-binding superfamily protein;basic helix-loop-helix (bHLH) DNA-binding superfamily protein;basic helix-loop-helix (bHLH) DNA-binding superfamily protein	HLH Helix-loop-helix DNA-binding domain
	Up		Cla016373	Chr9:9470056_9475156(+)	11.3878	5.04655	1.17412	0.00154765	0.0189675	Multidrug resistance protein mdtK (AHRD V1 **-- MDTK_ERWAM); contains Interpro domain(s) IPR002528 Multi antimicrobial extrusion protein MatE	AT1G71870	64.36	0	AtBIGE1A	MATE efflux family protein;MATE efflux family protein;MATE efflux family protein	MatE MatE
	Down		Cla011362	Chr1:1632932_1636169(+)	176.501	393.022	-1.15493	7.96e-05	0.00997891	Heat shock protein 5 (AHRD V1 ***- E4W3Z2_HAELO); contains Interpro domain(s) IPR013126 Heat shock protein 70	AT5G42020	89.56	0	AtBIP2	Heat shock protein 70 (Hsp 70) family protein;Heat shock protein 70 (Hsp 70) family protein;heat shock protein 70 (Hsp 70) family protein	HSP70 Hsp70 protein; MreB_Mbl MreB/Mbl protein
	Up		Cla020683	Chr5:27739579_27740478(+)	5.38005	2.33101	1.20666	0.0102364	0.0399157	BRI1 kinase inhibitor 1 (AHRD V1 ***- BKI1_ARATH)	AT5G42750	44.62	4e-34	AtBKI1	BRI1 kinase inhibitor 1;membrane-associated kinase regulator	No hits detected that satisfy reporting thresholds
	Up		Cla017624	Chr10:24647937_24650363(-)	65.6349	32.1666	1.0289	0.00829411	0.036272	BEL1-like homeodomain protein 2 (AHRD V1 *--- F4JQI6_ARATH); contains Interpro domain(s) IPR006563 POX	AT2G35940	49.22	0	AtBLH1	BEL1-like homeodomain 1;BEL1-like homeodomain 1;BEL1-like homeodomain 1	POX Associated with HOX; Homeobox_KN Homeobox KN domain; Homeodomain Homeodomain
	Down	Down	Cla007565	Chr6:7540684_7542222(+)	18.8775	69.6529	-1.88352	0.000743889	0.0155109	Serine/threonine protein kinase (AHRD V1 *-** E5RDC4_CUCME); contains Interpro domain(s) IPR002290 Serine/threonine protein kinase	AT4G14480	30.02	1e-55	AtBLUS1	Protein kinase superfamily protein;Protein kinase superfamily protein;Protein kinase superfamily protein	Pkinase Protein kinase domain; Pkinase_Tyr Protein tyrosine kinase
	Down		Cla005692	Chr10:3651383_3652093(-)	0.178282	3.11442	-4.12673	0.00377524	0.0260769	E3 ubiquitin-protein ligase CG7694 (AHRD V1 *--- RN181_DROME); contains Interpro domain(s) IPR018957 Zinc finger, C3HC4 RING-type	AT1G68180	32.58	1e-09	AtBTL15	RING/U-box superfamily protein;Zinc finger%2C C3HC4 type (RING finger) family protein;RING/U-box superfamily protein	zf-RING_2 Ring finger domain; zf-rbx1 RING-H2 zinc finger domain; zf-C3HC4_2 Zinc finger, C3HC4 type (RING finger); zf-RING_11 RING-like zinc finger; zf-C3HC4_3 Zinc finger, C3HC4 type (RING finger); zf-C3HC4 Zinc finger, C3HC4 type (RING finger); zf-ANAPC11 Anaphase-promoting complex subunit 11 RING-H2 finger
	Down		Cla016793	Chr11:24925864_24926181(-)	8.36467	20.9312	-1.32327	0.00240002	0.0221872	RING finger protein (AHRD V1 **-- F2T5L4_AJEDA); contains Interpro domain(s) IPR018957 Zinc finger, C3HC4 RING-type	AT1G68180	46.3	1e-12	AtBTL15	RING/U-box superfamily protein;RING/U-box superfamily protein	zf-RING_2 Ring finger domain; zf-RING_11 RING-like zinc finger; zf-C3HC4_2 Zinc finger, C3HC4 type (RING finger); zf-rbx1 RING-H2 zinc finger domain; zf-RING_UBOX RING-type zinc-finger; zf-RING_5 zinc-RING finger domain; zf-C3HC4 Zinc finger, C3HC4 type (RING finger)
	Down		Cla019138	Chr6:25389109_25396689(-)	0.996076	10.3514	-3.37743	0.000598127	0.0145475	RING finger and CHY zinc finger domain-containing protein 1 (AHRD V1 *-** B4FSR7_MAIZE); contains Interpro domain(s) IPR008913 Zinc finger, CHY-type	AT1G74770	49.06	0	AtBTSL1	zinc ion binding protein;zinc ion binding protein;zinc ion binding protein	zinc_ribbon_6 Zinc-ribbon; zf-CHY CHY zinc finger; Hemerythrin Hemerythrin HHE cation binding domain; zf-RING_2 Ring finger domain
	Down		Cla007950	Chr8:4657793_4658233(+)	1.79727	17.2985	-3.26677	0.000941779	0.0163498	BZip transcription factor (AHRD V1 *-** Q9AT29_PHAVU); contains Interpro domain(s) IPR011616 bZIP transcription factor, bZIP-1	AT3G30530	53.93	6e-26	AtbZIP42	basic leucine-zipper 42;basic leucine-zipper 58;basic leucine-zipper 43	bZIP_1 bZIP transcription factor; bZIP_2 Basic region leucine zipper
	Up		Cla016491	Chr11:21882491_21883045(-)	42.6106	7.88722	2.43362	0.00223139	0.021532	BZIP transcription factor (AHRD V1 **** E5GCT0_CUCME); contains Interpro domain(s) IPR011616 bZIP transcription factor, bZIP-1	AT3G30530	54.24	4e-50	AtbZIP42	basic leucine-zipper 42;basic leucine-zipper 43;basic leucine-zipper 58	bZIP_1 bZIP transcription factor; bZIP_2 Basic region leucine zipper
	Down		Cla020795	Chr5:26708231_26708728(-)	55.5561	164.237	-1.56376	0.0032066	0.0242976	BZIP transcription factor (Fragment) (AHRD V1 *-** F1DK38_MAIZE); contains Interpro domain(s) IPR011616 bZIP transcription factor, bZIP-1	AT1G75390	50.63	3e-38	AtbZIP44	basic leucine-zipper 44;G-box binding factor 6;basic leucine-zipper 44	bZIP_1 bZIP transcription factor; bZIP_2 Basic region leucine zipper
	Down	Down	Cla018454	Chr4:22207646_22209190(-)	0.146966	15.8693	-6.75462	6.97e-05	0.00982612	C2 domain-containing protein (AHRD V1 **-- D7L7Y3_ARALL); contains Interpro domain(s) IPR018029 C2 membrane targeting protein	AT3G17980	78.11	6e-94	AtC2	Calcium-dependent lipid-binding (CaLB domain) family protein;Calcium-dependent lipid-binding (CaLB domain) family protein;Calcium-dependent lipid-binding (CaLB domain) family protein	C2 C2 domain
	Down	Down	Cla005785	Chr11:11967720_11969407(+)	3.17699	16.6365	-2.38862	0.00431206	0.0273968	Cytochrome P450 cinnamate 4-hydroxylase (AHRD V1 **-- A9PBZ7_POPTR); contains Interpro domain(s) IPR001128 Cytochrome P450	AT2G30490	63.84	0	AtC4H	cinnamate-4-hydroxylase;cytochrome P450%2C family 98%2C subfamily A%2C polypeptide 3;cytochrome P450%2C family 71%2C subfamily B%2C polypeptide 4	p450 Cytochrome P450
	Down		Cla005787	Chr11:11984942_11986693(+)	0.646306	6.88754	-3.4137	7.35e-05	0.00984754	Cytochrome P450 cinnamate 4-hydroxylase (AHRD V1 **-- A9PBZ7_POPTR); contains Interpro domain(s) IPR001128 Cytochrome P450	AT2G30490	63.23	0	AtC4H	cinnamate-4-hydroxylase;cytochrome P450%2C family 98%2C subfamily A%2C polypeptide 3;cytochrome P450%2C family 98%2C subfamily A%2C polypeptide 9	p450 Cytochrome P450
	Down		Cla020287	Chr2:21195871_21196803(-)	0.552985	3.52031	-2.67039	0.000882059	0.0161604	CCR4-NOT transcription complex subunit 8 (AHRD V1 ***- B4FMS3_MAIZE); contains Interpro domain(s) IPR012337 Polynucleotidyl transferase, ribonuclease H fold	AT1G06450	39.44	2e-53	AtCAF1G	Polynucleotidyl transferase%2C ribonuclease H-like superfamily protein;Polynucleotidyl transferase%2C ribonuclease H-like superfamily protein;Polynucleotidyl transferase%2C ribonuclease H-like superfamily protein	CAF1 CAF1 family ribonuclease
	Down		Cla007809	Chr2:1503894_1519305(-)	5.03664	16.2491	-1.68983	0.00608757	0.0312599	Callose synthase 5 (AHRD V1 ***- C8C9X3_ARATH); contains Interpro domain(s) IPR003440 Glycosyl transferase, family 48	AT2G13680	80.25	0	AtCalS5	callose synthase 5;glucan synthase-like 12;callose synthase 1	Glucan_synthase 1,3-beta-glucan synthase component; FKS1_dom1 1,3-beta-glucan synthase subunit FKS1, domain-1; Vta1 Vta1 like
	Down		Cla007811	Chr2:1526952_1541820(-)	7.55585	46.1239	-2.60985	0.00423632	0.0271842	Callose synthase 5 (AHRD V1 ***- C8C9X3_ARATH); contains Interpro domain(s) IPR003440 Glycosyl transferase, family 48	AT2G13680	81.46	0	AtCalS5	callose synthase 5;glucan synthase-like 12;callose synthase 1	Glucan_synthase 1,3-beta-glucan synthase component; FKS1_dom1 1,3-beta-glucan synthase subunit FKS1, domain-1; Vta1 Vta1 like
	Down		Cla007080	Chr6:1545386_1554594(-)	1.00105	2.81189	-1.49003	0.0125472	0.0443199	DS synthase (AHRD V1 ***- F4YF84_PANQU); contains Interpro domain(s) IPR018333 Squalene cyclase	AT2G07050	49.62	4e-68	AtCAS1	cycloartenol synthase 1;cycloartenol synthase 1;lanosterol synthase 1	SQHop_cyclase_C Squalene-hopene cyclase C-terminal domain; Prenyltrans Prenyltransferase and squalene oxidase repeat; SQHop_cyclase_N Squalene-hopene cyclase N-terminal domain
	Down		Cla002274	Chr7:1325704_1327694(-)	0.680693	9.01814	-3.72775	0.000221912	0.012665	CASP-like protein RCOM_1174750 (AHRD V1 ***- CSPL6_RICCO); contains Interpro domain(s) IPR006459 Uncharacterised protein family UPF0497, trans-membrane plant subgroup	AT1G03700	56.33	8e-62	AtCASPL1C2	Uncharacterized protein family (UPF0497);Uncharacterized protein family (UPF0497);Uncharacterized protein family (UPF0497)	DUF588 Domain of unknown function (DUF588)
	Up		Cla017986	Chr10:27748215_27755840(-)	2.91472	0.731527	1.99438	0.00419165	0.0270217	Vacuolar cation/proton exchanger 4 (AHRD V1 ***- F4K9E5_ARATH); contains Interpro domain(s) IPR004713 Calcium/proton exchanger	AT3G51860	65.27	0	AtCAX3	cation exchanger 3;cation exchanger 1;cation exchanger 1	Na_Ca_ex Sodium/calcium exchanger protein
	Up		Cla011488	Chr1:2952338_2953027(+)	7.12484	0.804992	3.14581	0.00271571	0.0232388	DRE-binding transcription factor swDREB1 (AHRD V1 **** B1NA69_IPOBA); contains Interpro domain(s) IPR001471 Pathogenesis-related transcriptional factor and ERF, DNA-binding	AT4G25470	55.15	8e-64	AtCBF2	C-repeat/DRE binding factor 2;C-repeat-binding factor 4;dehydration response element B1A	AP2 AP2 domain
	Up		Cla006212	Chr5:7986501_7987136(-)	6.13194	0.955599	2.68187	0.0125953	0.0444439	Ethylene-responsive transcription factor 10 (AHRD V1 *-** ERF77_ARATH); contains Interpro domain(s) IPR001471 Pathogenesis-related transcriptional factor and ERF, DNA-binding	AT5G51990	56.25	5e-77	AtCBF4	C-repeat-binding factor 4;C-repeat/DRE binding factor 2;dehydration response element B1A	AP2 AP2 domain
	Up		Cla001482	Chr6:1699929_1700563(+)	270.277	134.558	1.00621	0.0104686	0.0403197	Light regulated protein-like protein (AHRD V1 *--- Q8S2S6_THEHA); contains Interpro domain(s) IPR009856 Light regulated Lir1	AT3G26740	63.53	4e-31	AtCCL	CCR-like protein	Lir1 Light regulated protein Lir1
	Down	Down	Cla016012	Chr2:6221396_6223575(-)	27.4659	348.566	-3.66572	6.85e-05	0.00982612	Caffeoyl-CoA O-methyltransferase (AHRD V1 **** B8XPP9_9ROSI); contains Interpro domain(s) IPR002935 O-methyltransferase, family 3	AT4G34050	90.2	2e-167	AtCCoAOMT	S-adenosyl-L-methionine-dependent methyltransferases superfamily protein;S-adenosyl-L-methionine-dependent methyltransferases superfamily protein;S-adenosyl-L-methionine-dependent methyltransferases superfamily protein	Methyltransf_3 O-methyltransferase; Methyltransf_24 Methyltransferase domain
	Up		Cla018604	Chr4:23659963_23661769(-)	9.95102	4.01695	1.30874	0.0046534	0.0281295	Dof zinc finger protein (AHRD V1 ***- C4B6D7_IPOBA); contains Interpro domain(s) IPR003851 Zinc finger, Dof-type	AT3G47500	43.33	1e-99	AtCDF3	cycling DOF factor 3;cycling DOF factor 2;cycling DOF factor 2	zf-Dof Dof domain, zinc finger
	Up		Cla003898	Chr1:6036265_6039062(+)	37.0062	12.0904	1.6139	0.000708975	0.0153545	Zinc finger protein 36 C3H type-like 1 (Fragment) (AHRD V1 *--* C5H179_XANVI); contains Interpro domain(s) IPR000571 Zinc finger, CCCH-type	AT1G68200	52.69	1e-83	AtCDM1	Zinc finger C-x8-C-x5-C-x3-H type family protein;Zinc finger C-x8-C-x5-C-x3-H type family protein;Zinc finger C-x8-C-x5-C-x3-H type family protein	zf-CCCH Zinc finger C-x8-C-x5-C-x3-H type (and similar); zf-CCCH_4 CCCH-type zinc finger; zf_CCCH_4 Zinc finger domain
	Down	Down	Cla021709	Chr5:5504679_5505947(-)	0.316302	81.1225	-8.00266	5.97e-05	0.00976752	Aspartyl protease family protein (AHRD V1 ***- Q6XBF8_ARATH); contains Interpro domain(s) IPR009007 Peptidase aspartic, catalytic	AT5G33340	36.53	7e-65	AtCDR1	Eukaryotic aspartyl protease family protein;Eukaryotic aspartyl protease family protein;Eukaryotic aspartyl protease family protein	TAXi_N Xylanase inhibitor N-terminal; TAXi_C Xylanase inhibitor C-terminal; Asp Eukaryotic aspartyl protease
	Down		Cla022729	Chr8:26047110_26048419(-)	0.0567747	22.5292	-8.63233	0.000871443	0.0161604	Cysteine proteinase (AHRD V1 **-* Q7X7A6_SOYBN); contains Interpro domain(s) IPR013128 Peptidase C1A, papain	AT5G50260	51.14	5e-128	AtCEP1	Cysteine proteinases superfamily protein;Cysteine proteinases superfamily protein;Cysteine proteinases superfamily protein	Peptidase_C1 Papain family cysteine protease; Inhibitor_I29 Cathepsin propeptide inhibitor domain (I29)
	Down	Down	Cla021361	Chr5:2523847_2526952(+)	22.3582	107.906	-2.27089	0.000737967	0.0155109	CER1 protein (AHRD V1 **-- O23679_ARATH); contains Interpro domain(s) IPR006694 Fatty acid hydroxylase	AT1G02205	69.51	9e-115	AtCER1	Fatty acid hydroxylase superfamily;Fatty acid hydroxylase superfamily;Fatty acid hydroxylase superfamily	FA_hydroxylase Fatty acid hydroxylase superfamily
	Down	Down	Cla021362	Chr5:2532887_2533372(+)	17.1493	88.9811	-2.37535	3.38e-05	0.00947041	CER1-like protein (AHRD V1 **-- O80938_ARATH)	AT1G02205	61.4	2e-48	AtCER1	Fatty acid hydroxylase superfamily	Wax2_C WAX2 C-terminal domain
	Down	Down	Cla007294	Chr7:6502152_6503649(-)	338.018	716.451	-1.08377	0.00280234	0.0234721	Chalcone isomerase-like protein (AHRD V1 ***- A9PI95_POPTR); contains Interpro domain(s) IPR016087 Chalcone isomerase	AT5G05270	61.83	7e-44	AtCHIL	Chalcone-flavanone isomerase family protein;Chalcone-flavanone isomerase family protein	Chalcone Chalcone-flavanone isomerase
	Down	Down	Cla002945	Chr6:9247526_9250338(+)	0.119114	344.282	-11.497	1.36e-05	0.00718174	Chalcone synthase (AHRD V1 ***- D6C6K7_NELNU); contains Interpro domain(s) IPR011141 Polyketide synthase, type III	AT5G13930	76.15	0	AtCHS	Chalcone and stilbene synthase family protein;Chalcone and stilbene synthase family protein;Chalcone and stilbene synthase family protein	Chal_sti_synt_N Chalcone and stilbene synthases, N-terminal domain; Chal_sti_synt_C Chalcone and stilbene synthases, C-terminal domain; ACP_syn_III_C 3-Oxoacyl-[acyl-carrier-protein (ACP)] synthase III C terminal; FAE1_CUT1_RppA FAE1/Type III polyketide synthase-like protein
	Down		Cla007810	Chr2:1521220_1523982(-)	0.480787	6.49067	-3.7549	0.000309792	0.0129433	Cation/H(+) antiporter 15 (AHRD V1 ***- CHX15_ARATH); contains Interpro domain(s) IPR006153 Cation/H+ exchanger	AT2G13620	70.96	0	AtCHX15	cation/hydrogen exchanger 15;cation/H+ exchanger 19;cation/H+ exchanger 19	Na_H_Exchanger Sodium/hydrogen exchanger family
	Down		Cla018226	Chr4:19973800_19979220(+)	0.645571	9.89393	-3.93789	0.00101095	0.0168165	Cation/H(+) antiporter 20 (AHRD V1 ***- CHX20_ARATH); contains Interpro domain(s) IPR006153 Cation/H+ exchanger	AT3G53720	69.43	0	AtCHX20	cation/H+ exchanger 20;cation/H+ exchanger 20;cation/H+ exchanger 18	Na_H_Exchanger Sodium/hydrogen exchanger family
	Down		Cla004228	Chr5:8933188_8935455(-)	0.123086	7.27742	-5.88569	0.000211318	0.0126299	Cation/H(+) antiporter 27 (AHRD V1 *-*- F4K9H0_ARATH); contains Interpro domain(s) IPR006153 Cation/H+ exchanger	AT3G44900	36.76	2e-143	AtCHX4	cation/H+ exchanger 4;cation/H+ exchanger 3;cation/hydrogen exchanger 15	Na_H_Exchanger Sodium/hydrogen exchanger family
	Down		Cla008007	Chr8:6384352_6384648(-)	1.38236	4.32963	-1.64711	0.000326195	0.0129433	Unknown Protein (AHRD V1)	AT3G25905	32.61	9e-08	AtCLE27	CLAVATA3/ESR-RELATED 27;CLAVATA3/ESR-RELATED 43	No hits detected that satisfy reporting thresholds
	Down		Cla003955	Chr1:6838199_6838747(-)	0.979941	3.68624	-1.91138	0.000149925	0.0111619	Calmodulin (AHRD V1 ***- D3PJ43_9MAXI); contains Interpro domain(s) IPR011992 EF-Hand type	AT1G24620	66.88	6e-72	AtCML25	EF hand calcium-binding protein family;calmodulin like 23;EF hand calcium-binding protein family	EF-hand_1 EF hand; EF-hand_7 EF-hand domain pair; EF-hand_5 EF hand; EF-hand_6 EF-hand domain; EF-hand_8 EF-hand domain pair; EF-hand_9 EF-hand domain; SPARC_Ca_bdg Secreted protein acidic and rich in cysteine Ca binding region
	Down		Cla018154	Chr4:19218717_19219178(-)	1.22148	6.78761	-2.47427	0.00548888	0.0300231	Copper transporter (AHRD V1 ***- B9HC67_POPTR); contains Interpro domain(s) IPR007274 Ctr copper transporter	AT2G26975	46.56	2e-29	AtCOPT6	Ctr copper transporter family;copper transporter 2;copper transporter 1	Ctr Ctr copper transporter family
	Down		Cla013969	Chr1:26980637_26983207(+)	12.6271	36.3193	-1.52421	0.0122026	0.0436981	Cathepsin B-like cysteine proteinase 6 (AHRD V1 **-* CPR6_CAEEL); contains Interpro domain(s) IPR013128 Peptidase C1A, papain	AT4G36880	64.85	6e-159	AtCP1	cysteine proteinase1;Granulin repeat cysteine protease family protein;Granulin repeat cysteine protease family protein	Peptidase_C1 Papain family cysteine protease; Inhibitor_I29 Cathepsin propeptide inhibitor domain (I29)
	Down	Down	Cla012928	Chr9:21122653_21124919(+)	25.2214	178.684	-2.82469	0.000312603	0.0129433	Undecaprenyl pyrophosphate synthase (AHRD V1 ***- F7MGY7_9FUSO); contains Interpro domain(s) IPR001441 Di-trans-poly-cis-decaprenylcistransferase-like	AT2G17570	55.37	8e-91	AtCPT1	Undecaprenyl pyrophosphate synthetase family protein;Undecaprenyl pyrophosphate synthetase family protein;Undecaprenyl pyrophosphate synthetase family protein	Prenyltransf Putative undecaprenyl diphosphate synthase
	Up		Cla013358	Chr2:30056515_30059018(+)	14.7194	6.10945	1.2686	0.000649905	0.0149832	Undecaprenyl pyrophosphate synthase (AHRD V1 ***- F5UFE1_9CYAN); contains Interpro domain(s) IPR001441 Di-trans-poly-cis-decaprenylcistransferase-like	AT5G58770	60.92	2e-105	AtCPT4	Undecaprenyl pyrophosphate synthetase family protein;Undecaprenyl pyrophosphate synthetase family protein;Undecaprenyl pyrophosphate synthetase family protein	Prenyltransf Putative undecaprenyl diphosphate synthase
	Up		Cla013424	Chr2:29500147_29500917(-)	28.438	13.3404	1.09202	0.00318815	0.0242652	Ethylene-responsive transcription factor 4 (AHRD V1 *-** B6TYT8_MAIZE); contains Interpro domain(s) IPR001471 Pathogenesis-related transcriptional factor and ERF, DNA-binding	AT4G27950	40	3e-38	AtCRF4	cytokinin response factor 4;cytokinin response factor 2;cytokinin response factor 2	AP2 AP2 domain
	Down		Cla017205	Chr10:18748049_18752419(-)	5.07198	18.2773	-1.84943	4.41e-05	0.00976752	Cinnamoyl-CoA reductase 4 (AHRD V1 ***- E3NZI6_GOSHI); contains Interpro domain(s) IPR016040 NAD(P)-binding domain	AT1G15950	70.65	4e-134	AtCRR1	cinnamoyl coa reductase 1;cinnamoyl coa reductase 1;cinnamoyl coa reductase 1	Epimerase NAD dependent epimerase/dehydratase family; NAD_binding_10 NAD(P)H-binding; 3Beta_HSD 3-beta hydroxysteroid dehydrogenase/isomerase family; GDP_Man_Dehyd GDP-mannose 4,6 dehydratase; NmrA NmrA-like family; NAD_binding_4 Male sterility protein
	Up		Cla017209	Chr10:18719093_18720366(-)	4.35145	1.08918	1.99825	0.0041905	0.0270217	Cinnamoyl-CoA reductase 4 (AHRD V1 ***- E3NZI6_GOSHI); contains Interpro domain(s) IPR016040 NAD(P)-binding domain	AT1G15950	72.83	3e-141	AtCRR1	cinnamoyl coa reductase 1;cinnamoyl coa reductase 1;cinnamoyl coa reductase 1	Epimerase NAD dependent epimerase/dehydratase family; 3Beta_HSD 3-beta hydroxysteroid dehydrogenase/isomerase family; NAD_binding_10 NAD(P)H-binding; GDP_Man_Dehyd GDP-mannose 4,6 dehydratase; NmrA NmrA-like family; NAD_binding_4 Male sterility protein; Polysacc_synt_2 Polysaccharide biosynthesis protein
	Up	Up	Cla010446	Chr2:10411798_10417182(-)	7.00553	2.80422	1.32089	0.0127609	0.0447313	Cellulose synthase (AHRD V1 ***- Q2HT12_MEDTR); contains Interpro domain(s) IPR005150 Cellulose synthase	AT2G32530	44.32	0	AtCSLB03	cellulose synthase-like B3;cellulose synthase-like B4;cellulose synthase-like B6	Cellulose_synt Cellulose synthase
	Up		Cla010447	Chr2:10486652_10490526(-)	16.0786	7.72056	1.05837	0.00781492	0.0353624	Cellulose synthase (AHRD V1 ***- Q2HT12_MEDTR); contains Interpro domain(s) IPR005150 Cellulose synthase	AT2G32530	45.41	0	AtCSLB03	cellulose synthase-like B3;cellulose synthase-like B4;cellulose synthase-like B	Cellulose_synt Cellulose synthase
	Down		Cla009915	Chr1:34049683_34057367(-)	37.6304	79.6961	-1.08261	0.000383508	0.0134097	CTP synthase-like protein (AHRD V1 ***- F4I6G9_ARATH); contains Interpro domain(s) IPR004468 CTP synthase	AT1G30820	83.46	0	AtCTPS1	CTP synthase family protein;CTP synthase family protein;CTP synthase family protein	CTP_synth_N CTP synthase N-terminus; GATase Glutamine amidotransferase class-I; Peptidase_C26 Peptidase C26
	Down		Cla002186	Chr3:18273522_18273895(+)	11.8722	63.0924	-2.40988	2.93e-05	0.00881891	GDSL esterase/lipase (AHRD V1 ***- F4JZZ2_ARATH); contains Interpro domain(s) IPR001087 Lipase, GDSL	AT5G33370	69.74	3e-30	AtCUS2	GDSL-like Lipase/Acylhydrolase superfamily protein;GDSL-like Lipase/Acylhydrolase superfamily protein;GDSL-like Lipase/Acylhydrolase superfamily protein	No hits detected that satisfy reporting thresholds
	Down	Down	Cla010254	Chr9:29339351_29340271(-)	55.8102	306.312	-2.4564	0.00204638	0.0208695	Gibberellin receptor GID1L2 (AHRD V1 **-- B6T2M3_MAIZE); contains Interpro domain(s) IPR013094 Alpha/beta hydrolase fold-3	AT3G48700	50.63	3e-99	AtCXE13	carboxyesterase 13;alpha/beta-Hydrolases superfamily protein;alpha/beta-Hydrolases superfamily protein	Abhydrolase_3 alpha/beta hydrolase fold; COesterase Carboxylesterase family
	Up		Cla014115	Chr1:28331741_28333611(+)	28.0854	10.7988	1.37895	0.000881572	0.0161604	Cyclin D2 (AHRD V1 ***- Q8L6U0_DAUCA); contains Interpro domain(s) IPR015451 Cyclin D	AT2G22490	54.52	2e-96	AtCYCD2;1	Cyclin D2%3B1;Cyclin D2%3B1;CYCLIN D4%3B1	Cyclin_N Cyclin, N-terminal domain; Cyclin_C Cyclin, C-terminal domain
	Up		Cla020603	Chr5:28333396_28334693(+)	25.8011	9.62665	1.42232	0.0011938	0.017793	Cyclin d (AHRD V1 ***- D3YBB0_TRIRP); contains Interpro domain(s) IPR015451 Cyclin D	AT4G37630	37.28	4e-42	AtCYCD5;1	cyclin d5%3B1;cyclin d5%3B1;CYCLIN D1%3B1	Cyclin_N Cyclin, N-terminal domain
	Down		Cla018193	Chr4:19648503_19652059(+)	0.699422	2.84034	-2.02183	0.0141952	0.0472051	Cyclin D (AHRD V1 ***- Q8GS62_9BRYO); contains Interpro domain(s) IPR015451 Cyclin D	AT5G02110	34.67	6e-37	AtCYCD7;1	CYCLIN D7%3B1;CYCLIN D1%3B1;CYCLIN D4%3B1	Cyclin_N Cyclin, N-terminal domain; Cyclin_C Cyclin, C-terminal domain
	Down	Down	Cla021151	Chr5:806786_808441(+)	8.88805	597.076	-6.0699	0.0138984	0.0467362	Cytochrome P450 (AHRD V1 ***- B9GR20_POPTR); contains Interpro domain(s) IPR001128 Cytochrome P450	AT1G01280	72.94	0	AtCYP703A2	cytochrome P450%2C family 703%2C subfamily A%2C polypeptide 2;Cytochrome P450 superfamily protein;ferulic acid 5-hydroxylase 1	p450 Cytochrome P450
	Down		Cla017251	Chr10:18181369_18185858(-)	1.02124	16.4631	-4.01084	4.48e-05	0.00976752	Cytochrome P450 (AHRD V1 ***- B9HNL2_POPTR); contains Interpro domain(s) IPR001128 Cytochrome P450	AT3G20940	45.9	3e-151	AtCYP705A30	cytochrome P450%2C family 705%2C subfamily A%2C polypeptide 30;cytochrome P450%2C family 712%2C subfamily A%2C polypeptide 1;cytochrome P450%2C family 705%2C subfamily A%2C polypeptide 3	p450 Cytochrome P450
	Down	Down	Cla005457	Chr7:28458229_28460392(+)	25.3886	57.7467	-1.18556	0.00282769	0.023533	Cytochrome P450 (AHRD V1 ***- B9MVQ8_POPTR); contains Interpro domain(s) IPR001128 Cytochrome P450	AT4G19230	75.66	0	AtCYP707A1	cytochrome P450%2C family 707%2C subfamily A%2C polypeptide 1;cytochrome P450%2C family 707%2C subfamily A%2C polypeptide 3;cytochrome P450%2C family 707%2C subfamily A%2C polypeptide 1	p450 Cytochrome P450
	Down		Cla015020	Chr9:8717058_8721574(+)	5.40435	10.8419	-1.00443	0.0068696	0.0330926	Cytochrome P450 (AHRD V1 ***- B9GTK3_POPTR); contains Interpro domain(s) IPR001128 Cytochrome P450	AT5G45340	39.05	8e-103	AtCYP707A3	cytochrome P450%2C family 707%2C subfamily A%2C polypeptide 3;cytochrome P450%2C family 722%2C subfamily A%2C polypeptide 1;cytochrome P450%2C family 707%2C subfamily A%2C polypeptide 1	p450 Cytochrome P450
	Up		Cla007313	Chr7:6877871_6882134(+)	17.0837	6.65461	1.3602	0.00551892	0.0300611	Cytochrome P450 (AHRD V1 ***- B9N1R4_POPTR); contains Interpro domain(s) IPR001128 Cytochrome P450	AT5G24910	53.18	0	AtCYP714A1	cytochrome P450%2C family 714%2C subfamily A%2C polypeptide 1;cytochrome P450%2C family 714%2C subfamily A%2C polypeptide 2;cytochrome P450%2C family 714%2C subfamily A%2C polypeptide 2	p450 Cytochrome P450
	Down		Cla018901	Chr6:23328460_23333221(+)	0.182663	3.75953	-4.36329	0.00555622	0.0300983	Cytochrome P450 (AHRD V1 ***- B9N823_POPTR); contains Interpro domain(s) IPR001128 Cytochrome P450	AT5G36110	53.71	0	AtCYP716A1	cytochrome P450%2C family 716%2C subfamily A%2C polypeptide 1;cytochrome P450%2C family 716%2C subfamily A%2C polypeptide 1;cytochrome P450%2C family 716%2C subfamily A%2C polypeptide 2	p450 Cytochrome P450
	Down		Cla001029	Chr3:21865593_21866991(-)	0.181339	6.70788	-5.20909	0.00288626	0.0237047	Cytochrome P450 (AHRD V1 ***- B9N823_POPTR); contains Interpro domain(s) IPR001128 Cytochrome P450	AT5G36140	58.5	2e-128	AtCYP716A2	cytochrome P450%2C family 716%2C subfamily A%2C polypeptide 2;cytochrome P450%2C family 716%2C subfamily A%2C polypeptide 1;cytochrome P450%2C family 716%2C subfamily A%2C polypeptide 1	p450 Cytochrome P450
	Down		Cla000011	Chr0:475201_475941(-)	0.824011	9.62972	-3.54676	0.000475058	0.0138562	Cytochrome P450 (AHRD V1 ***- B9IGU2_POPTR); contains Interpro domain(s) IPR001128 Cytochrome P450	AT3G48310	39.26	4e-52	AtCYP71A22	cytochrome P450%2C family 71%2C subfamily A%2C polypeptide 22;cytochrome P450%2C family 71%2C subfamily A%2C polypeptide 21;cytochrome P450%2C family 71%2C subfamily A%2C polypeptide 26	p450 Cytochrome P450
	Down		Cla000224	Chr0:17403370_17405029(-)	0.0403987	4.65301	-6.84771	8.51e-05	0.00997891	Cytochrome P450 (AHRD V1 ***- B9I3I4_POPTR); contains Interpro domain(s) IPR001128 Cytochrome P450	AT5G25120	39.92	1e-135	AtCYP71B11	cytochrome p450%2C family 71%2C subfamily B%2C polypeptide 11;cytochrome P450%2C family 71 subfamily B%2C polypeptide 7;cytochrome P450%2C family 83%2C subfamily B%2C polypeptide 1	p450 Cytochrome P450
	Down	Down	Cla005127	Chr3:3461211_3463467(-)	2.92991	21.4338	-2.87096	0.000174886	0.011725	Cytochrome P450 (AHRD V1 ***- B9IGU2_POPTR); contains Interpro domain(s) IPR001128 Cytochrome P450	AT3G26310	44.69	2e-151	AtCYP71B35	cytochrome P450%2C family 71%2C subfamily B%2C polypeptide 35;cytochrome P450%2C family 71%2C subfamily A%2C polypeptide 25;cytochrome P450%2C family 71%2C subfamily B%2C polypeptide 34	p450 Cytochrome P450
	Up		Cla010023	Chr5:32700087_32702254(-)	4.91606	1.52889	1.68501	0.00645044	0.0321685	Cytochrome P450 (AHRD V1 ***- B9HLF2_POPTR); contains Interpro domain(s) IPR001128 Cytochrome P450	AT3G26320	50.23	2e-157	AtCYP71B36	cytochrome P450%2C family 71%2C subfamily B%2C polypeptide 36;cytochrome P450%2C family 71%2C subfamily B%2C polypeptide 34;cytochrome P450%2C family 71%2C subfamily B%2C polypeptide 37	p450 Cytochrome P450
	Down		Cla014236	Chr1:29327470_29330238(-)	0.182874	2.42752	-3.73056	0.00105342	0.0170355	Cytochrome P450 (AHRD V1 ***- B9GTK3_POPTR); contains Interpro domain(s) IPR001128 Cytochrome P450	AT1G19630	45.25	3e-129	AtCYP722A1	cytochrome P450%2C family 722%2C subfamily A%2C polypeptide 1;cytochrome P450%2C family 722%2C subfamily A%2C polypeptide 1;cytochrome P450%2C family 722%2C subfamily A%2C polypeptide 1	p450 Cytochrome P450
	Down		Cla016444	Chr11:21381054_21384598(-)	0.0616747	24.0361	-8.60631	0.000260688	0.012665	Cytochrome P450 (AHRD V1 ***- B9N227_POPTR); contains Interpro domain(s) IPR001128 Cytochrome P450	AT5G38450	72.44	0	AtCYP735A1	cytochrome P450%2C family 735%2C subfamily A%2C polypeptide 1;cytochrome P450%2C family 735%2C subfamily A%2C polypeptide 2;cytochrome P450%2C family 735%2C subfamily A%2C polypeptide 1	p450 Cytochrome P450
	Down	Down	Cla013708	Chr8:17425791_17427329(+)	7.99023	60.7882	-2.92748	3.99e-05	0.00976752	Cytochrome P450 (AHRD V1 ***- D9MWM1_9SOLN); contains Interpro domain(s) IPR001128 Cytochrome P450	AT5G04660	70.08	0	AtCYP77A4	cytochrome P450%2C family 77%2C subfamily A%2C polypeptide 4;cytochrome P450%2C family 77%2C subfamily A%2C polypeptide 9;cytochrome P450%2C family 77%2C subfamily A%2C polypeptide 6	p450 Cytochrome P450
	Down		Cla018550	Chr4:23224344_23226323(-)	3.58863	53.0145	-3.88488	0.000860659	0.0161538	Cytochrome P450 family protein (AHRD V1 ***- Q9C9D1_ARATH); contains Interpro domain(s) IPR001128 Cytochrome P450	AT1G74110	64.07	0	AtCYP78A10	cytochrome P450%2C family 78%2C subfamily A%2C polypeptide 10;cytochrome P450%2C family 78%2C subfamily A%2C polypeptide 5;cytochrome P450%2C family 78%2C subfamily A%2C polypeptide 6	p450 Cytochrome P450
	Down		Cla022033	Chr8:19709518_19711505(-)	21.0067	45.6404	-1.11946	0.000537447	0.0140675	Cytochrome P450 family protein (AHRD V1 ***- Q9C9D1_ARATH); contains Interpro domain(s) IPR001128 Cytochrome P450	AT1G13710	65.1	0	AtCYP78A5	cytochrome P450%2C family 78%2C subfamily A%2C polypeptide 5;cytochrome P450%2C family 78%2C subfamily A%2C polypeptide 10;cytochrome p450 78a9	p450 Cytochrome P450
	Up		Cla006688	Chr6:3165031_3166716(-)	17.0135	4.66201	1.86766	0.000358975	0.0132951	Cytochrome P450 (AHRD V1 ***- B9I921_POPTR); contains Interpro domain(s) IPR001128 Cytochrome P450	AT2G46660	63.99	0	AtCYP78A6	cytochrome P450%2C family 78%2C subfamily A%2C polypeptide 6;cytochrome p450 78a9;cytochrome p450 78a9	p450 Cytochrome P450
	Down		Cla007079	Chr6:1538623_1540306(-)	1.95418	6.54449	-1.74372	0.00197686	0.0207036	Cytochrome P450 (AHRD V1 ***- Q9XFX1_CICAR); contains Interpro domain(s) IPR001128 Cytochrome P450	AT4G37370	59.06	2e-118	AtCYP81D8	cytochrome P450%2C family 81%2C subfamily D%2C polypeptide 8;Cytochrome P450 superfamily protein;Cytochrome P450 superfamily protein	p450 Cytochrome P450
	Up		Cla013985	Chr1:27104146_27107421(-)	17.3411	8.46257	1.03503	0.00529798	0.0296015	Cytochrome P450 (AHRD V1 ***- B9NAD7_POPTR); contains Interpro domain(s) IPR001128 Cytochrome P450	AT4G37370	57.55	0	AtCYP81D8	cytochrome P450%2C family 81%2C subfamily D%2C polypeptide 8;cytochrome P450%2C family 81%2C subfamily D%2C polypeptide 3;cytochrome P450%2C family 81%2C subfamily D%2C polypeptide 2	p450 Cytochrome P450
	Down	Down	Cla001235	Chr6:4263837_4265492(-)	29.4103	72.7707	-1.30704	0.00242816	0.0222354	Cytochrome P450 (AHRD V1 ***- B9I8K8_POPTR); contains Interpro domain(s) IPR001128 Cytochrome P450	AT2G45970	77.57	0	AtCYP86A8	cytochrome P450%2C family 86%2C subfamily A%2C polypeptide 8;cytochrome P450%2C family 86%2C subfamily A%2C polypeptide 2;cytochrome P450%2C family 86%2C subfamily A%2C polypeptide 4	p450 Cytochrome P450
	Down	Down	Cla005445	Chr7:28235648_28242810(-)	12.2952	180.308	-3.87429	0.000101448	0.0103379	Cytochrome P450 (AHRD V1 ***- B9HCD6_POPTR); contains Interpro domain(s) IPR001128 Cytochrome P450	AT4G15110	77.54	0	AtCYP97B3	cytochrome P450%2C family 97%2C subfamily B%2C polypeptide 3;cytochrome P450%2C family 97%2C subfamily A%2C polypeptide 3;Cytochrome P450 superfamily protein	p450 Cytochrome P450
	Up		Cla001238	Chr6:4295041_4300514(+)	77.5192	38.2091	1.02064	0.00232479	0.0218987	Cysteine synthase (AHRD V1 **** A5AEP0_VITVI); contains Interpro domain(s) IPR005859 Cysteine synthase A	AT3G61440	78.88	0	AtCYSC1	cysteine synthase C1;cysteine synthase C1;cysteine synthase C1	PALP Pyridoxal-phosphate dependent enzyme
	Up		Cla022623	Chr8:25139059_25139951(+)	33.9516	14.3083	1.24663	0.0105937	0.0404938	Hydrolase alpha/beta fold family protein expressed (AHRD V1 ***- Q10J20_ORYSJ); contains Interpro domain(s) IPR000073 Alpha/beta hydrolase fold-1	AT3G03990	77.15	7e-153	AtD14	alpha/beta-Hydrolases superfamily protein;alpha/beta-Hydrolases superfamily protein;alpha/beta-Hydrolases superfamily protein	Abhydrolase_6 Alpha/beta hydrolase family; Abhydrolase_1 alpha/beta hydrolase fold
	Up		Cla019263	Chr6:26491747_26496784(+)	49.2744	23.2116	1.08599	0.0116337	0.0426712	Aspartyl aminopeptidase-like protein (AHRD V1 *-*- Q8LF32_ARATH); contains Interpro domain(s) IPR001948 Peptidase M18, aminopeptidase I	AT5G60160	71.51	4e-89	AtDAP1	Zn-dependent exopeptidases superfamily protein;Zn-dependent exopeptidases superfamily protein	Peptidase_M18 Aminopeptidase I zinc metalloprotease (M18)
	Up		Cla015463	Chr9:1362393_1363631(-)	35.7371	12.3124	1.53731	0.000504921	0.0138841	Aquaporin (AHRD V1 ***- O81186_VERFO); contains Interpro domain(s) IPR012269 Aquaporin	AT3G16240	80.59	2e-129	AtDELTA-TIP	delta tonoplast integral protein;tonoplast intrinsic protein 2%3B3;tonoplast intrinsic protein 2%3B2	MIP Major intrinsic protein
	Up		Cla007389	Chr5:22368471_22371647(-)	46.5154	19.9227	1.2233	0.00266892	0.0230385	Auxin-responsive GH3-like (AHRD V1 ***- Q0GUM1_ARATH); contains Interpro domain(s) IPR004993 GH3 auxin-responsive promoter	AT5G54510	80.74	0	AtDFL1	Auxin-responsive GH3 family protein;Auxin-responsive GH3 family protein;Auxin-responsive GH3 family protein	GH3 GH3 auxin-responsive promoter
	Down	Down	Cla014868	Chr9:6936000_6936308(+)	372.258	836.318	-1.16775	0.0126366	0.0445385	PVR3-like protein (AHRD V1 **-- B6TVY8_MAIZE); contains Interpro domain(s) IPR003612 Plant lipid transfer protein/seed storage/trypsin-alpha amylase inhibitor	AT5G48485	51.19	1e-21	AtDIR1	Bifunctional inhibitor/lipid-transfer protein/seed storage 2S albumin superfamily protein;Bifunctional inhibitor/lipid-transfer protein/seed storage 2S albumin superfamily protein;Bifunctional inhibitor/lipid-transfer protein/seed storage 2S albumin superfamily protein	LTP_2 Probable lipid transfer; Tryp_alpha_amyl Protease inhibitor/seed storage/LTP family
	Up		Cla013687	Chr8:17596564_17598289(-)	24.0924	10.1122	1.25248	0.00485474	0.0284964	MYB transcription factor (AHRD V1 **-- Q66RN1_HEVBR); contains Interpro domain(s) IPR006447 Myb-like DNA-binding region, SHAQKYF class	AT5G04760	62.78	2e-79	AtDIV2	Duplicated homeodomain-like superfamily protein;Duplicated homeodomain-like superfamily protein;Homeodomain-like transcriptional regulator	Myb_DNA-binding Myb-like DNA-binding domain; Myb_DNA-bind_6 Myb-like DNA-binding domain
	Down		Cla018620	Chr4:23788897_23790004(+)	5.48288	23.915	-2.12491	0.00281767	0.0235296	1-aminocyclopropane-1-carboxylate oxidase (AHRD V1 **-- Q60I93_PYRPY); contains Interpro domain(s) IPR005123 Oxoglutarate and iron-dependent oxygenase	AT4G10490	33.56	9e-44	AtDLO2	2-oxoglutarate (2OG) and Fe(II)-dependent oxygenase superfamily protein;2-oxoglutarate (2OG) and Fe(II)-dependent oxygenase superfamily protein;2-oxoglutarate (2OG) and Fe(II)-dependent oxygenase superfamily protein	2OG-FeII_Oxy 2OG-Fe(II) oxygenase superfamily; DIOX_N non-haem dioxygenase in morphine synthesis N-terminal
	Up		Cla012621	Chr7:24693545_24694168(+)	21.4578	8.393	1.35424	0.000487958	0.0138562	Dof zinc finger protein 4 (AHRD V1 *-*- A5HWF3_HORVD); contains Interpro domain(s) IPR003851 Zinc finger, Dof-type	AT1G51700	55.92	7e-46	AtDOF1	DOF zinc finger protein 1;DOF zinc finger protein 2;Dof-type zinc finger DNA-binding family protein	zf-Dof Dof domain, zinc finger
	Down		Cla021569	Chr5:4215180_4217046(-)	0.0682057	9.88081	-7.17859	0.000513769	0.0139744	Polycomb group RING finger protein 1 (AHRD V1 *--- C1BZT9_ESOLU); contains Interpro domain(s) IPR018957 Zinc finger, C3HC4 RING-type	AT2G30580	38.28	5e-84	AtDRIP2	DREB2A-interacting protein 2;DREB2A-interacting protein 2;DREB2A-interacting protein 1	zf-C3HC4_2 Zinc finger, C3HC4 type (RING finger); zf-C3HC4 Zinc finger, C3HC4 type (RING finger); zf-RING_UBOX RING-type zinc-finger
	Down		Cla011148	Chr3:25736183_25737239(-)	0.873881	21.0752	-4.59197	4.63e-05	0.00976752	F1L3.5 (AHRD V1 **-- Q9LNR9_ARATH)	AT1G72490	33.22	2e-31	AtDRO1	hypothetical protein;hypothetical protein;hypothetical protein	No hits detected that satisfy reporting thresholds
	Up		Cla012463	Chr8:985233_990883(-)	3.46451	1.5225	1.1862	0.00251658	0.0224978	MATE efflux protein-like (AHRD V1 **-- Q5N7N1_ORYSJ); contains Interpro domain(s) IPR015521 MATE family transporter related protein IPR002528 Multi antimicrobial extrusion protein MatE	AT1G71140	45.59	3e-121	AtDTX14	MATE efflux family protein;MATE efflux family protein;MATE efflux family protein	MatE MatE
	Up		Cla010083	Chr5:32229726_32231892(-)	137.601	7.17029	4.26231	0.00427412	0.0272907	BHLH transcription factor (AHRD V1 ***- E5GBJ2_CUCME); contains Interpro domain(s) IPR011598 Helix-loop-helix DNA-binding	AT4G21330	35	3e-15	AtDYT1	basic helix-loop-helix (bHLH) DNA-binding superfamily protein;basic helix-loop-helix (bHLH) DNA-binding superfamily protein;basic helix-loop-helix (bHLH) DNA-binding superfamily protein	bHLH-MYC_N bHLH-MYC and R2R3-MYB transcription factors N-terminal; HLH Helix-loop-helix DNA-binding domain
	Up		Cla019450	Chr3:5361984_5364151(-)	10.0275	2.36891	2.08167	0.00655346	0.032449	Terminal flower 1 (Fragment) (AHRD V1 **-- B3VT07_9ROSA); contains Interpro domain(s) IPR008914 Phosphatidylethanolamine-binding protein PEBP	AT1G18100	59.77	1e-74	AtE12A11	PEBP (phosphatidylethanolamine-binding protein) family protein;PEBP (phosphatidylethanolamine-binding protein) family protein;PEBP (phosphatidylethanolamine-binding protein) family protein	PBP Phosphatidylethanolamine-binding protein
	Up		Cla020970	Chr5:25017384_25020015(-)	303.308	137.716	1.13909	0.000852793	0.0161257	Ein3-binding f-box protein 3 (AHRD V1 **** B9HA53_POPTR); contains Interpro domain(s) IPR006553 Leucine-rich repeat, cysteine-containing subtype	AT2G25490	61.56	0	AtEBF1	EIN3-binding F box protein 1;EIN3-binding F box protein 2;F-box/RNI-like superfamily protein	LRR_6 Leucine Rich repeat; F-box F-box domain; F-box-like F-box-like
	Up		Cla006079	Chr7:2889157_2890083(-)	29.2547	8.86099	1.72313	0.00131753	0.0182864	Circadian clock coupling factor ZGT (AHRD V1 ***- Q94FM9_TOBAC)	AT3G63060	62.6	1e-111	AtEDL3	EID1-like 3;EID1-like 1;EID1-like 2	No hits detected that satisfy reporting thresholds
	Up		Cla013516	Chr2:28515663_28516715(+)	231.793	104.384	1.15093	0.00194732	0.0206517	1-aminocyclopropane-1-carboxylate oxidase (AHRD V1 ***- Q5VLJ5_HEVBR); contains Interpro domain(s) IPR005123 Oxoglutarate and iron-dependent oxygenase	AT1G05010	74.06	3e-178	AtEFE	ethylene-forming enzyme;2-oxoglutarate (2OG) and Fe(II)-dependent oxygenase superfamily protein;ACC oxidase 2	2OG-FeII_Oxy 2OG-Fe(II) oxygenase superfamily; DIOX_N non-haem dioxygenase in morphine synthesis N-terminal
	Up	Up	Cla014414	Chr1:30589375_30590520(-)	238.81	76.8488	1.63577	0.000306161	0.0129433	1-aminocyclopropane-1-carboxylate oxidase (AHRD V1 ***- Q9M7K5_PRUPE); contains Interpro domain(s) IPR005123 Oxoglutarate and iron-dependent oxygenase	AT1G05010	73.75	4e-178	AtEFE	ethylene-forming enzyme;2-oxoglutarate (2OG) and Fe(II)-dependent oxygenase superfamily protein;ACC oxidase 2	2OG-FeII_Oxy 2OG-Fe(II) oxygenase superfamily; DIOX_N non-haem dioxygenase in morphine synthesis N-terminal
	Up		Cla016287	Chr9:10354829_10356395(-)	80.4246	18.0427	2.15622	0.0012035	0.017824	1-aminocyclopropane-1-carboxylate oxidase (AHRD V1 ***- Q94F66_SOLTU); contains Interpro domain(s) IPR005123 Oxoglutarate and iron-dependent oxygenase	AT1G05010	73.07	5e-176	AtEFE	ethylene-forming enzyme;ACC oxidase 2;2-oxoglutarate (2OG) and Fe(II)-dependent oxygenase superfamily protein	2OG-FeII_Oxy 2OG-Fe(II) oxygenase superfamily; DIOX_N non-haem dioxygenase in morphine synthesis N-terminal
	Down		Cla018732	Chr6:21505248_21508211(+)	77.6693	239.171	-1.62263	0.000883036	0.0161604	Eukaryotic translation initiation factor 5A (AHRD V1 ***- D6N3G5_GOSHI); contains Interpro domain(s) IPR001884 Translation elongation factor, IF5A	AT1G13950	87.42	3e-100	AtELF5A-1	eukaryotic elongation factor 5A-1;eukaryotic elongation factor 5A-3;Eukaryotic translation initiation factor 5A-1 (eIF-5A 1) protein	eIF-5a Eukaryotic elongation factor 5A hypusine, DNA-binding OB fold
	Down		Cla022363	Chr8:22964777_22966636(+)	10.467	27.8101	-1.40977	0.0012447	0.0180035	Eukaryotic translation initiation factor 5A (AHRD V1 ***- D6N3G5_GOSHI); contains Interpro domain(s) IPR001884 Translation elongation factor, IF5A	AT1G13950	89.31	7e-101	AtELF5A-1	eukaryotic elongation factor 5A-1;eukaryotic elongation factor 5A-3;Eukaryotic translation initiation factor 5A-1 (eIF-5A 1) protein	eIF-5a Eukaryotic elongation factor 5A hypusine, DNA-binding OB fold
	Down		Cla004870	Chr1:32977_34558(+)	0.427942	3.31819	-2.95491	0.000354053	0.0132834	Unknown Protein (AHRD V1); contains Interpro domain(s) IPR005900 6-phosphogluconolactonase	AT5G24400	32.48	7e-10	Atemb2024	NagB/RpiA/CoA transferase-like superfamily protein	No hits detected that satisfy reporting thresholds
	Down		Cla004871	Chr1:35853_38416(+)	36.2416	73.9995	-1.02987	0.00013279	0.0107871	6-phosphogluconolactonase (AHRD V1 ***- B6UAK0_MAIZE); contains Interpro domain(s) IPR005900 6-phosphogluconolactonase	AT5G24400	59.88	8e-124	Atemb2024	NagB/RpiA/CoA transferase-like superfamily protein;6-phosphogluconolactonase 2;6-phosphogluconolactonase 5	Glucosamine_iso Glucosamine-6-phosphate isomerases/6-phosphogluconolactonase
	Down	Down	Cla011066	Chr3:24790029_24791139(-)	0.900645	198.579	-7.78454	0.00034358	0.0131328	Blue copper protein (AHRD V1 *--- B6UCC3_MAIZE); contains Interpro domain(s) IPR008972 Cupredoxin	AT2G27035	54.41	5e-51	AtENODL20	early nodulin-like protein 20;early nodulin-like protein 17;early nodulin-like protein 19	Cu_bind_like Plastocyanin-like domain
	Down	Down	Cla013553	Chr2:28117056_28117819(-)	5.26225	330.353	-5.97218	0.0108863	0.0411048	Early nodulin-55-1 (Fragment) (AHRD V1 *--- NO551_SOYBN); contains Interpro domain(s) IPR008972 Cupredoxin	AT4G28365	46.04	8e-49	AtENODL3	early nodulin-like protein 3;early nodulin-like protein 1;early nodulin-like protein 1	Cu_bind_like Plastocyanin-like domain
	Down	Down	Cla018523	Chr4:22949500_22950121(+)	2.61523	14.2136	-2.44226	0.000321774	0.0129433	Early nodulin-like protein 5 (AHRD V1 **-- Q9LII0_ARATH); contains Interpro domain(s) IPR003245 Plastocyanin-like	AT3G18590	57.6	3e-47	AtENODL5	early nodulin-like protein 5;early nodulin-like protein 6;early nodulin-like protein 21	Cu_bind_like Plastocyanin-like domain
	Up		Cla012461	Chr8:1051276_1051749(+)	6.56644	2.38613	1.46044	0.0134488	0.0459425	Ethylene-responsive transcription factor 4 (AHRD V1 *-** ERF78_ARATH); contains Interpro domain(s) IPR001471 Pathogenesis-related transcriptional factor and ERF, DNA-binding	AT1G33760	63.19	1e-50	AtERF022	Integrase-type DNA-binding superfamily protein;Integrase-type DNA-binding superfamily protein;Integrase-type DNA-binding superfamily protein	AP2 AP2 domain
	Up		Cla021525	Chr5:3865527_3866207(-)	30.5238	10.2859	1.56926	0.00786674	0.0355317	Ethylene-responsive transcription factor (AHRD V1 **** F2Y9E9_COFAR); contains Interpro domain(s) IPR001471 Pathogenesis-related transcriptional factor and ERF, DNA-binding	AT3G23240	59.09	2e-73	AtERF1	ethylene response factor 1;ethylene-responsive element binding factor 15;octadecanoid-responsive AP2/ERF 59	AP2 AP2 domain
	Up		Cla005613	Chr10:2545101_2545940(-)	32.2296	13.7921	1.22454	0.00637658	0.0319658	Ethylene responsive transcription factor 1a (AHRD V1 **** D1MWZ3_CITLA); contains Interpro domain(s) IPR001471 Pathogenesis-related transcriptional factor and ERF, DNA-binding	AT4G17500	59.18	9e-81	AtERF-1	ethylene responsive element binding factor 1;ethylene responsive element binding factor 2;ethylene-responsive element binding factor 13	AP2 AP2 domain
	Down		Cla007501	Chr7:16624620_16625123(-)	6.93928	15.1217	-1.12376	0.00534025	0.0297173	Xyloglucan endotransglucosylase/hydrolase 2 (AHRD V1 *-*- D5HP44_9ROSA); contains Interpro domain(s) IPR000757 Glycoside hydrolase, family 16	AT2G01850	75	2e-30	AtEXGT-A3	endoxyloglucan transferase A3;xyloglucan endotransglucosylase/hydrolase 28;xyloglucan endotransglucosylase/hydrolase 30	Glyco_hydro_16 Glycosyl hydrolases family 16
	Up		Cla002485	Chr10:13047918_13048835(+)	192.037	62.6245	1.61658	0.0021666	0.0213067	Os06g0220000 protein (Fragment) (AHRD V1 ***- Q0DDJ2_ORYSJ); contains Interpro domain(s) IPR006766 Phosphate-induced protein 1 conserved region	AT5G64260	71.15	1e-152	AtEXL2	EXORDIUM like 2;Phosphate-responsive 1 family protein;EXORDIUM like 4	Phi_1 Phosphate-induced protein 1 conserved region
	Down		Cla016139	Chr9:13292123_13295313(-)	10.0451	37.0567	-1.88324	0.0113796	0.0422114	Expansin-like protein (AHRD V1 ***- A2ICD7_CUNLA); contains Interpro domain(s) IPR007112 Expansin 45, endoglucanase-like	AT4G17030	42.21	1e-54	AtEXLB1	expansin-like B1;expansin-like A1;expansin-like A1	Pollen_allerg_1 Pollen allergen; DPBB_1 Lytic transglycolase
	Up		Cla022102	Chr8:20411772_20413500(-)	13.6601	4.20166	1.70094	0.00155906	0.0190182	Os06g0220000 protein (Fragment) (AHRD V1 ***- Q0DDJ2_ORYSJ); contains Interpro domain(s) IPR006766 Phosphate-induced protein 1 conserved region	AT4G08950	53.67	2e-107	AtEXO	Phosphate-responsive 1 family protein;EXORDIUM like 2;Phosphate-responsive 1 family protein	Phi_1 Phosphate-induced protein 1 conserved region
	Down		Cla015495	Chr9:1077460_1079478(-)	0.455478	5.36706	-3.55868	0.00523817	0.0294683	Exocyst complex component EXO70 (AHRD V1 *-** EXO70_YEAST); contains Interpro domain(s) IPR004140 Exo70 exocyst complex subunit	AT4G31540	48.62	0	AtEXO70G1	exocyst subunit exo70 family protein G1;exocyst subunit exo70 family protein G2;exocyst subunit exo70 family protein A2	Exo70 Exo70 exocyst complex subunit
	Down		Cla000765	Chr7:18700620_18711032(-)	6.05006	16.4942	-1.44694	0.00252641	0.0225056	Respiratory burst oxidase (AHRD V1 ***- D7KSW1_ARALL); contains Interpro domain(s) IPR013121 Ferric reductase, NAD binding	AT1G64060	60.7	4e-114	AtF	respiratory burst oxidase protein F;Riboflavin synthase-like superfamily protein;respiratory burst oxidase homolog A	NAD_binding_6 Ferric reductase NAD binding domain; NADPH_Ox Respiratory burst NADPH oxidase; FAD_binding_8 FAD-binding domain; Ferric_reduct Ferric reductase like transmembrane component; EF-hand_7 EF-hand domain pair; EF-hand_1 EF hand
	Down	Down	Cla008896	Chr10:1588214_1595487(+)	3.5414	152.792	-5.43111	0.000504729	0.0138841	Flavanone-3-hydroxylase (AHRD V1 ***- A2IBF9_GOSHI); contains Interpro domain(s) IPR005123 Oxoglutarate and iron-dependent oxygenase	AT3G51240	68.62	0	AtF3H	flavanone 3-hydroxylase;flavanone 3-hydroxylase;2-oxoglutarate (2OG) and Fe(II)-dependent oxygenase superfamily protein	DIOX_N non-haem dioxygenase in morphine synthesis N-terminal; 2OG-FeII_Oxy 2OG-Fe(II) oxygenase superfamily
	Down		Cla003200	Chr2:33685522_33686706(+)	0.04836	2.08858	-5.43257	0.000939296	0.0163498	Fatty acid desaturase (AHRD V1 ***- E5D7U7_9GENT); contains Interpro domain(s) IPR005804 Fatty acid desaturase, type 1	AT3G12120	57.65	1e-168	AtFAD2	fatty acid desaturase 2;fatty acid desaturase 2;fatty acid desaturase 7	FA_desaturase Fatty acid desaturase; DUF3474 Domain of unknown function (DUF3474)
	Down		Cla012721	Chr7:25690758_25692618(+)	0.009124	6.17056	-9.40152	0.00519421	0.0293344	Delta 9 acyl-lipid desaturase (AHRD V1 **** B0JWW8_MICAN); contains Interpro domain(s) IPR005804 Fatty acid desaturase, type 1	AT3G15850	61.22	1e-136	AtFAD5	fatty acid desaturase 5;delta 9 desaturase 1;16:0delta9 desaturase 2	FA_desaturase Fatty acid desaturase
	Up		Cla001349	Chr1:31255138_31256481(-)	21.5161	8.65908	1.31313	0.00984287	0.0391178	F-box family protein (AHRD V1 ***- B9H220_POPTR); contains Interpro domain(s) IPR001810 Cyclin-like F-box	AT4G21510	43.83	2e-34	AtFBS2	F-box family protein;F-box family protein;F-box family protein	No hits detected that satisfy reporting thresholds
	Down		Cla021885	Chr8:18163757_18165950(-)	1.22606	4.18305	-1.77052	0.000984536	0.0165911	Formin 3 (AHRD V1 *-*- F4JJE7_ARATH); contains Interpro domain(s) IPR015425 Actin-binding FH2	AT1G70140	48.8	2e-148	AtFH8	formin 8;formin homologue 4;Actin-binding FH2 (formin homology 2) family protein	FH2 Formin Homology 2 Domain
	Down		Cla018196	Chr4:19664130_19665789(+)	0.227613	2.68688	-3.56128	0.00278933	0.0234463	FHY1-1 (AHRD V1 **-- D5MAD1_ARATH)	AT2G37678	31.84	1e-08	AtFHY1	far-red elongated hypocotyl 1;far-red-elongated hypocotyl1-like protein;far-red-elongated hypocotyl1-like protein	No hits detected that satisfy reporting thresholds
	Up		Cla002194	Chr7:7115272_7118065(-)	5.12503	1.84882	1.47096	0.00218555	0.021384	Flavin-binding kelch repeat F-box 1 (Fragment) (AHRD V1 **-* E3TPZ7_HELAN); contains Interpro domain(s) IPR015915 Kelch-type beta propeller	AT1G68050	81.83	0	AtFKF1	flavin-binding%2C kelch repeat%2C f box 1;Galactose oxidase/kelch repeat superfamily protein;Galactose oxidase/kelch repeat superfamily protein	Kelch_4 Galactose oxidase, central domain; Kelch_3 Galactose oxidase, central domain; Kelch_2 Kelch motif; Kelch_5 Kelch motif; Kelch_1 Kelch motif; PAS_9 PAS domain; Kelch_6 Kelch motif; PAS PAS fold; PAS_3 PAS fold
	Down		Cla022265	Chr8:22088939_22089832(-)	0.432328	2.63716	-2.60879	0.00107173	0.0170823	Fasciclin-like arabinogalactan protein 17 (AHRD V1 *-*- A9XTM2_GOSHI); contains Interpro domain(s) IPR000782 FAS1 domain	AT2G24450	40.3	6e-45	AtFLA3	FASCICLIN-like arabinogalactan protein 5 precursor;FASCICLIN-like arabinogalactan protein 3 precursor;FASCICLIN-like arabinogalactan protein 14 precursor	No hits detected that satisfy reporting thresholds
	Down		Cla008008	Chr8:6468636_6469827(-)	6.56495	46.2403	-2.81629	0.00155973	0.0190182	Anthocyanidin synthase (AHRD V1 ***- B2M0X8_GINBI); contains Interpro domain(s) IPR005123 Oxoglutarate and iron-dependent oxygenase	AT5G08640	62.87	2e-155	AtFLS1	flavonol synthase 1;flavonol synthase 1;flavonol synthase 3	2OG-FeII_Oxy 2OG-Fe(II) oxygenase superfamily; DIOX_N non-haem dioxygenase in morphine synthesis N-terminal
	Down	Down	Cla007008	Chr6:800737_803976(+)	10.048	33.2082	-1.72463	0.00189149	0.0203252	5-dehydro-2-deoxygluconokinase (AHRD V1 **-- IOLC_BACHD); contains Interpro domain(s) IPR011611 Carbohydrate/purine kinase	AT3G59480	79.39	0	AtFRK7	pfkB-like carbohydrate kinase family protein;pfkB-like carbohydrate kinase family protein;pfkB-like carbohydrate kinase family protein	PfkB pfkB family carbohydrate kinase
	Down		Cla002362	Chr1:4247712_4249952(-)	1.55738	6.83573	-2.13398	0.000171966	0.011725	Gibberellin 20-oxidase (AHRD V1 ***- Q8GT56_CUCMA); contains Interpro domain(s) IPR005123 Oxoglutarate and iron-dependent oxygenase	AT5G51810	67.24	2e-172	AtGA20OX2	2-oxoglutarate (2OG) and Fe(II)-dependent oxygenase superfamily protein;gibberellin 20 oxidase 2;gibberellin 20-oxidase 3	2OG-FeII_Oxy 2OG-Fe(II) oxygenase superfamily; DIOX_N non-haem dioxygenase in morphine synthesis N-terminal
	Down		Cla008413	Chr1:9551599_9554494(-)	0.247113	2.92021	-3.56283	0.00498653	0.0288202	Gibberellin 20-oxidase (AHRD V1 ***- B9H4B0_POPTR); contains Interpro domain(s) IPR005123 Oxoglutarate and iron-dependent oxygenase	AT5G51810	52.33	5e-140	AtGA20OX2	gibberellin 20 oxidase 2;2-oxoglutarate (2OG) and Fe(II)-dependent oxygenase superfamily protein;gibberellin 20-oxidase 3	2OG-FeII_Oxy 2OG-Fe(II) oxygenase superfamily; DIOX_N non-haem dioxygenase in morphine synthesis N-terminal
	Up		Cla005397	Chr7:27582311_27583894(+)	13.3025	1.95591	2.76578	0.00290979	0.0237402	Gibberellin 2-oxidase (AHRD V1 ***- Q7X9N5_CUCMA); contains Interpro domain(s) IPR005123 Oxoglutarate and iron-dependent oxygenase	AT1G78440	61.04	3e-137	ATGA2OX1	gibberellin 2-beta-dioxygenase;gibberellin 2-oxidase;gibberellin 2-oxidase 3	2OG-FeII_Oxy 2OG-Fe(II) oxygenase superfamily; DIOX_N non-haem dioxygenase in morphine synthesis N-terminal
	Down	Down	Cla010652	Chr6:12241264_12243124(+)	0.143617	181.685	-10.305	0.000591118	0.0144891	Legumain/vacuolar processing enzyme (AHRD V1 **-- E3PQU2_9MAGN); contains Interpro domain(s) IPR001096 Peptidase C13, legumain	AT4G32940	52.21	4e-134	AtGAMMA-VPE	gamma vacuolar processing enzyme;alpha-vacuolar processing enzyme;beta vacuolar processing enzyme	Peptidase_C13 Peptidase C13 family
	Down		Cla002597	Chr3:3700711_3702880(+)	371.727	757.602	-1.0272	0.000424548	0.0136318	Glyceraldehyde-3-phosphate dehydrogenase (AHRD V1 ***- E5GBV9_CUCME); contains Interpro domain(s) IPR000173 Glyceraldehyde 3-phosphate dehydrogenase	AT3G04120	88.41	0	AtGAPC1	glyceraldehyde-3-phosphate dehydrogenase C subunit 1;glyceraldehyde-3-phosphate dehydrogenase C2;glyceraldehyde-3-phosphate dehydrogenase C2	Gp_dh_C Glyceraldehyde 3-phosphate dehydrogenase, C-terminal domain; Gp_dh_N Glyceraldehyde 3-phosphate dehydrogenase, NAD binding domain
	Down		Cla020838	Chr5:26340187_26340673(+)	5.01028	110.632	-4.46473	0.00472069	0.0281925	Gibberellin-regulated protein 1 (AHRD V1 **-- F4I0N7_ARATH); contains Interpro domain(s) IPR003854 Gibberellin regulated protein	AT1G75750	67.57	2e-30	AtGASA1	GAST1 protein homolog 1;GAST1 protein homolog 1;Gibberellin-regulated family protein	GASA Gibberellin regulated protein
	Up		Cla022427	Chr8:23526174_23526623(+)	9.82516	3.59548	1.4503	0.0156498	0.0498287	Gibberellin-regulated protein 1 (AHRD V1 **-- F4I0N7_ARATH); contains Interpro domain(s) IPR003854 Gibberellin regulated protein	AT4G09600	65.43	7e-31	AtGASA3	GAST1 protein homolog 3;GAST1 protein homolog 1;GAST1 protein homolog 1	GASA Gibberellin regulated protein
	Up	Down	Cla021282	Chr5:1812219_1816772(+)	31.1566	15.5657	1.00117	0.0103737	0.0401714	Glycosyltransferase (AHRD V1 **-- B9IC41_POPTR); contains Interpro domain(s) IPR002495 Glycosyl transferase, family 8	AT3G61130	60.29	0	AtGAUT1	galacturonosyltransferase 1;galacturonosyltransferase 3;galacturonosyltransferase 3	Glyco_transf_8 Glycosyl transferase family 8
	Down		Cla014817	Chr9:6306624_6315490(-)	12.1213	26.0178	-1.10195	0.00825867	0.0361992	Glycosyltransferase (AHRD V1 **-- B9HBZ3_POPTR); contains Interpro domain(s) IPR002495 Glycosyl transferase, family 8	AT1G06780	51.59	0	AtGAUT6	galacturonosyltransferase 6;galacturonosyltransferase 6;los glycosyltransferase 5	Glyco_transf_8 Glycosyl transferase family 8
	Down		Cla003596	Chr1:5256608_5258966(+)	17.9501	131.907	-2.87746	0.0026796	0.0230717	Glutamate dehydrogenase (AHRD V1 ***- Q94IA5_BRANA); contains Interpro domain(s) IPR006095 Glutamate/phenylalanine/leucine/valine dehydrogenase	AT5G07440	85.54	0	AtGDH2	glutamate dehydrogenase 2;glutamate dehydrogenase 2;glutamate dehydrogenase 1	ELFV_dehydrog Glutamate/Leucine/Phenylalanine/Valine dehydrogenase; ELFV_dehydrog_N Glu/Leu/Phe/Val dehydrogenase, dimerisation domain
	Down		Cla010695	Chr7:28898674_28901946(+)	7.47119	16.7385	-1.16376	0.00363248	0.0256645	Glutamate dehydrogenase (AHRD V1 ***- Q94IA5_BRANA); contains Interpro domain(s) IPR014362 Glutamate dehydrogenase	AT5G07440	88.81	0	AtGDH2	glutamate dehydrogenase 2;glutamate dehydrogenase 2;glutamate dehydrogenase 1	ELFV_dehydrog Glutamate/Leucine/Phenylalanine/Valine dehydrogenase; ELFV_dehydrog_N Glu/Leu/Phe/Val dehydrogenase, dimerisation domain
	Down		Cla012913	Chr9:20890311_20894704(+)	2.86907	9.68933	-1.75581	0.00464455	0.0281295	Rab-GDP dissociation inhibitor (AHRD V1 ***- A5CKE3_SOLLC); contains Interpro domain(s) IPR018203 GDP dissociation inhibitor	AT5G09550	87.39	0	AtGDI	GDP dissociation inhibitor family protein / Rab GTPase activator family protein;RAB GDP dissociation inhibitor 2;guanosine nucleotide diphosphate dissociation inhibitor 1	GDI GDP dissociation inhibitor
	Down	Down	Cla019629	Chr3:7841067_7845650(+)	62.9616	126.392	-1.00536	0.00841964	0.0365596	GDSL esterase/lipase (AHRD V1 ***- F4JSC9_ARATH); contains Interpro domain(s) IPR001087 Lipase, GDSL	AT1G29670	70.57	0	AtGDSL1	GDSL-like Lipase/Acylhydrolase superfamily protein;GDSL-like Lipase/Acylhydrolase superfamily protein;GDSL-like Lipase/Acylhydrolase superfamily protein	Lipase_GDSL GDSL-like Lipase/Acylhydrolase
	Up		Cla021053	Chr5:23937189_23937653(+)	9.11235	3.4483	1.40194	0.00189682	0.0203259	GDU1 (AHRD V1 ***- B6TY22_MAIZE)	AT2G24762	46.77	4e-26	AtGDU4	glutamine dumper 4;glutamine dumper 3;glutamine dumper 1	No hits detected that satisfy reporting thresholds
	Up		Cla018094	Chr4:18538531_18539768(+)	8.06126	2.21413	1.86427	0.00198564	0.0207541	Late embryogenesis abundant protein (AHRD V1 ***- A4VBF1_VIGRA); contains Interpro domain(s) IPR000389 Small hydrophilic plant seed protein	AT2G40170	80.22	2e-44	AtGEA6	Stress induced protein;Stress induced protein;Stress induced protein	LEA_5 Small hydrophilic plant seed protein
	Down	Down	Cla003140	Chr2:34164099_34165329(+)	6.29341	55.5474	-3.14181	0.00032107	0.0129433	GDSL esterase/lipase At1g71250 (AHRD V1 ***- GDL28_ARATH); contains Interpro domain(s) IPR001087 Lipase, GDSL	AT4G10950	31.98	6e-57	AtGELP77	SGNH hydrolase-type esterase superfamily protein;SGNH hydrolase-type esterase superfamily protein;GDSL-like Lipase/Acylhydrolase superfamily protein	Lipase_GDSL GDSL-like Lipase/Acylhydrolase
	Down		Cla011165	Chr3:25895838_25897005(-)	70.9318	156.322	-1.14002	0.000632847	0.0148531	Germin-like protein 6 (AHRD V1 ***- A8QK92_VITVI); contains Interpro domain(s) IPR014710 RmlC-like jelly roll fold	AT5G20630	69.74	3e-94	AtGER3	germin 3;germin-like protein 1;RmlC-like cupins superfamily protein	Cupin_1 Cupin; Cupin_2 Cupin domain
	Down		Cla008892	Chr10:1571894_1574727(+)	18.3216	78.096	-2.0917	0.00133665	0.0183015	Endoglucanase 1 (AHRD V1 ***- B6U0P7_MAIZE); contains Interpro domain(s) IPR001701 Glycoside hydrolase, family 9	AT4G02290	61.17	0	AtGH9B13	glycosyl hydrolase 9B13;cellulase 2;glycosyl hydrolase 9B6	Glyco_hydro_9 Glycosyl hydrolase family 9
	Down		Cla005335	Chr10:5690782_5694096(+)	0.618692	3.84659	-2.63629	0.000331188	0.012984	Endoglucanase 1 (AHRD V1 ***- B6U0J0_MAIZE); contains Interpro domain(s) IPR001701 Glycoside hydrolase, family 9	AT2G32990	70.24	0	AtGH9B8	glycosyl hydrolase 9B8;glycosyl hydrolase 9C3;glycosyl hydrolase 9C3	Glyco_hydro_9 Glycosyl hydrolase family 9
	Down		Cla012669	Chr7:25168563_25177079(+)	2.71284	10.922	-2.00936	0.0017269	0.0196233	Homeobox-leucine zipper protein ATHB-9 (AHRD V1 *-*- ATBH9_ARATH); contains Interpro domain(s) IPR002913 Lipid-binding START	AT1G79840	58.84	0	AtGL2	HD-ZIP IV family of homeobox-leucine zipper protein with lipid-binding START domain-containing protein;HD-ZIP IV family of homeobox-leucine zipper protein with lipid-binding START domain-containing protein;HD-ZIP IV family of homeobox-leucine zipper protein with lipid-binding START domain-containing protein	START START domain; Homeodomain Homeodomain
	Down	Down	Cla021729	Chr5:5716865_5719290(-)	0.793109	79.0789	-6.63963	0.000153895	0.0113544	Hydroxycinnamoyl-CoA shikimate/quinate hydroxycinnamoyl transferase (AHRD V1 **-* D1GJ94_COFAR); contains Interpro domain(s) IPR003480 Transferase	AT1G65450	35.04	3e-79	AtGLC	HXXXD-type acyl-transferase family protein;HXXXD-type acyl-transferase family protein;HXXXD-type acyl-transferase family protein	Transferase Transferase family
	Up		Cla012547	Chr7:23991024_23992956(-)	7.94491	3.33181	1.25372	0.00790833	0.0355529	GDSL esterase/lipase 1 (AHRD V1 ***- GLIP1_ARATH); contains Interpro domain(s) IPR001087 Lipase, GDSL	AT5G40990	46.81	8e-108	AtGLIP1	GDSL lipase 1;GDSL-motif lipase 2;GDSL-motif lipase 5	Lipase_GDSL GDSL-like Lipase/Acylhydrolase
	Down		Cla007749	Chr2:851353_853285(+)	0.900733	26.6289	-4.88575	5.85e-05	0.00976752	GDSL esterase/lipase 3 (AHRD V1 ***- GLIP3_ARATH); contains Interpro domain(s) IPR001087 Lipase, GDSL	AT1G53990	44.09	3e-74	AtGLIP3	GDSL-motif lipase 3;GDSL lipase 1;GDSL-motif lipase 4	Lipase_GDSL GDSL-like Lipase/Acylhydrolase
	Down	Down	Cla007750	Chr2:860355_863501(+)	30.5208	108.19	-1.82571	0.000566974	0.0143314	GDSL esterase/lipase 5 (AHRD V1 ***- GLIP5_ARATH); contains Interpro domain(s) IPR001087 Lipase, GDSL	AT1G53920	45.73	6e-104	AtGLIP5	GDSL-motif lipase 5;GDSL lipase 1;GDSL-motif lipase 2	Lipase_GDSL GDSL-like Lipase/Acylhydrolase
	Down	Down	Cla005136	Chr3:28805780_28806499(-)	0.751773	7.45095	-3.30905	0.00083371	0.0159936	Germin-like protein 2 (AHRD V1 ***- Q0MYQ7_VITVI); contains Interpro domain(s) IPR014710 RmlC-like jelly roll fold	AT3G62020	71.72	1e-101	AtGLP10	germin-like protein 10;germin-like protein subfamily 2 member 2 precursor;germin-like protein 5	Cupin_1 Cupin; Cupin_2 Cupin domain
	Down		Cla020002	Chr2:25004685_25005864(-)	36.5556	97.2662	-1.41185	0.000532822	0.0140675	Germin-like protein 2 (AHRD V1 ***- Q0MYQ7_VITVI); contains Interpro domain(s) IPR014710 RmlC-like jelly roll fold	AT3G62020	75	1e-105	AtGLP10	germin-like protein 10;germin-like protein 5;germin-like protein subfamily 2 member 2 precursor	Cupin_1 Cupin; Cupin_2 Cupin domain
	Down	Down	Cla019237	Chr6:26309849_26311444(+)	4.33918	1171.22	-8.07637	1.88e-05	0.00851685	Glyoxal oxidase (AHRD V1 ***- B6TJK4_MAIZE); contains Interpro domain(s) IPR009880 Glyoxal oxidase, N-terminal	AT1G14430	48.25	5e-163	AtGOXL5	glyoxal oxidase-related protein;glyoxal oxidase-related protein;glyoxal oxidase-related protein	Glyoxal_oxid_N Glyoxal oxidase N-terminus; DUF1929 Domain of unknown function (DUF1929)
	Down		Cla005520	Chr9:34387338_34389380(+)	2.04986	131.813	-6.00682	0.000884457	0.0161604	ER glycerol-phosphate acyltransferase (AHRD V1 ***- B9T753_RICCO); contains Interpro domain(s) IPR002123 Phospholipid/glycerol acyltransferase	AT1G06520	62.26	0	AtGPAT1	glycerol-3-phosphate acyltransferase 1;glycerol-3-phosphate acyltransferase 6;glycerol-3-phosphate acyltransferase 4	Acyltransferase Acyltransferase
	Down		Cla017972	Chr10:27624584_27627890(-)	10.7504	22.6594	-1.07572	0.00410835	0.0268322	Glycerol-3-phosphate acyltransferase 6 (AHRD V1 ***- D7LKT2_ARALL); contains Interpro domain(s) IPR002123 Phospholipid/glycerol acyltransferase	AT2G38110	75	0	AtGPAT6	glycerol-3-phosphate acyltransferase 6;glycerol-3-phosphate acyltransferase 4;glycerol-3-phosphate acyltransferase 8	HAD haloacid dehalogenase-like hydrolase; Acyltransferase Acyltransferase
	Down		Cla014464	Chr1:30924752_30926607(-)	9.77392	19.9756	-1.03123	1.71e-05	0.00799755	Glucose-6-phosphate/phosphate translocator 2 (AHRD V1 ***- D7KVF2_ARALL); contains Interpro domain(s) IPR004696 Tpt phosphate/phosphoenolpyruvate translocator	AT1G61800	79.83	0	AtGPT2	glucose-6-phosphate/phosphate translocator 2;glucose-6-phosphate/phosphate translocator 2;glucose 6-phosphate/phosphate translocator 1	TPT Triose-phosphate Transporter family; EamA EamA-like transporter family
	Down		Cla016859	Chr11:25481111_25482330(-)	22.7683	52.3923	-1.20233	0.00666806	0.0326915	Growth-regulating factor 5 (AHRD V1 *-*- Q8L8A6_ARATH); contains Interpro domain(s) IPR014977 WRC	AT2G06200	48.13	6e-47	AtGRF6	growth-regulating factor 6;growth-regulating factor 6;growth-regulating factor 2	WRC WRC; QLQ QLQ
	Down		Cla009650	Chr1:31830847_31831245(-)	2.17002	19.904	-3.19728	0.000697948	0.0152975	Glutaredoxin (AHRD V1 ***- B9HGW6_POPTR); contains Interpro domain(s) IPR011905 Glutaredoxin-like, plant II	AT1G28480	50.91	6e-36	AtGRX480	Thioredoxin superfamily protein;Glutaredoxin family protein;Glutaredoxin family protein	No hits detected that satisfy reporting thresholds
	Up		Cla004771	Chr3:24342466_24344172(+)	8.84957	4.34495	1.02627	0.0109736	0.0413722	Callose synthase (AHRD V1 ***- F4JDA3_ARATH)	AT3G07160	67.53	7e-83	AtGSL10	No Hits	No hits detected that satisfy reporting thresholds
	Down		Cla002649	Chr3:4170227_4174093(-)	7.68056	20.2872	-1.40129	0.000451833	0.0138514	Receptor-like kinase (AHRD V1 **** A7VM28_MARPO); contains Interpro domain(s) IPR002290 Serine/threonine protein kinase	AT4G20140	65.12	0	AtGSO1	Leucine-rich repeat transmembrane protein kinase;Leucine-rich repeat transmembrane protein kinase;Leucine-rich repeat receptor-like protein kinase family protein	LRR_8 Leucine rich repeat; LRR_4 Leucine Rich repeats (2 copies); Pkinase Protein kinase domain; Pkinase_Tyr Protein tyrosine kinase; LRR_1 Leucine Rich Repeat; LRRNT_2 Leucine rich repeat N-terminal domain
	Down		Cla017855	Chr10:26763677_26767531(-)	0	1.78204	#NAME?	0.0091132	0.0378025	Glutathione S-transferase omega (AHRD V1 ***- D6BR66_9ROSI); contains Interpro domain(s) IPR004045 Glutathione S-transferase, N-terminal	AT5G02790	48.94	4e-66	AtGSTL3	Glutathione S-transferase family protein;glutathione transferase lambda 1;glutathione transferase lambda 1	GST_N_3 Glutathione S-transferase, N-terminal domain; GST_N_2 Glutathione S-transferase, N-terminal domain; GST_N Glutathione S-transferase, N-terminal domain
	Down		Cla018151	Chr4:19173875_19174633(+)	0.716022	2.95472	-2.04494	0.00132904	0.0182864	Glutathione S-transferase (AHRD V1 ***- D8UY87_GLYSO); contains Interpro domain(s) IPR004046 Glutathione S-transferase, C-terminal	AT3G09270	46.79	6e-61	AtGSTU8	glutathione S-transferase TAU 8;glutathione S-transferase tau 7;glutathione S-transferase tau 4	GST_C Glutathione S-transferase, C-terminal domain; GST_N Glutathione S-transferase, N-terminal domain; GST_N_3 Glutathione S-transferase, N-terminal domain; GST_C_2 Glutathione S-transferase, C-terminal domain; GST_N_2 Glutathione S-transferase, N-terminal domain
	Down		Cla018615	Chr4:23757162_23758755(-)	0.0117927	3.70555	-8.29565	0.00172296	0.0196114	Glutathione S-transferase (AHRD V1 ***- Q9FUT0_ARATH); contains Interpro domain(s) IPR004046 Glutathione S-transferase, C-terminal	AT5G62480	48.91	2e-78	AtGSTU9	glutathione S-transferase tau 9;glutathione S-transferase tau 9;glutathione S-transferase TAU 10	GST_N_3 Glutathione S-transferase, N-terminal domain; GST_N Glutathione S-transferase, N-terminal domain; GST_N_2 Glutathione S-transferase, N-terminal domain; GST_C Glutathione S-transferase, C-terminal domain
	Down	Down	Cla021172	Chr5:941848_943293(-)	13.7467	89.9706	-2.71037	2.88e-05	0.00881891	UDP-glycosyltransferase (AHRD V1 ***- B9U3W6_MEDTR); contains Interpro domain(s) IPR002213 UDP-glucuronosyl/UDP-glucosyltransferase	AT4G01070	58.55	0	AtGT72B1	UDP-Glycosyltransferase superfamily protein;UDP-glucosyl transferase 72B3;UDP-glucosyl transferase 72B3	UDPGT UDP-glucoronosyl and UDP-glucosyl transferase
	Down	Down	Cla010225	Chr5:31094314_31097526(+)	0.172501	13.2799	-6.26649	0.00209512	0.0210956	Heparanase (AHRD V1 ***- C5IFK6_ORYSI); contains Interpro domain(s) IPR005199 Glycoside hydrolase family 79, N-terminal	AT5G07830	49.44	0	AtGUS2	glucuronidase 2;glucuronidase 1;glucuronidase 1	Glyco_hydro_79n Glycosyl hydrolase family 79, N-terminal domain
	Down		Cla019257	Chr6:26421412_26422560(-)	1.25328	3.68626	-1.55645	0.00459308	0.0280081	Phosphopantothenoylcysteine decarboxylase (AHRD V1 **-- B4FCR1_MAIZE); contains Interpro domain(s) IPR003382 Flavoprotein	AT1G48605	68.04	2e-93	ATHAL3B	Flavoprotein;HAL3-like protein A	Flavoprotein Flavoprotein
	Up		Cla014193	Chr1:29001924_29003910(+)	48.05	5.44805	3.14073	0.00152647	0.0189334	Homeobox-leucine zipper protein (AHRD V1 *-*- Q9FXN8_ZINEL); contains Interpro domain(s) IPR001356 Homeobox	AT2G18550	50.92	1e-63	AtHB21	homeobox protein 21;homeobox protein 40;homeobox protein 40	Homeodomain Homeodomain
	Up		Cla002419	Chr7:23441137_23441994(+)	23.0861	5.56726	2.05199	0.0136392	0.0463055	Homeobox leucine zipper protein (AHRD V1 *-*- Q9XH73_PRUAR); contains Interpro domain(s) IPR001356 Homeobox	AT2G46680	58.04	3e-37	AtHB-7	homeobox 7;homeobox 7;homeobox 12	Homeodomain Homeodomain; HALZ Homeobox associated leucine zipper
	Up		Cla021121	Chr5:608150_608920(+)	14.7298	6.83795	1.1071	0.013921	0.0467362	Homeobox leucine zipper protein (AHRD V1 ***- B8YIB0_MIRJA); contains Interpro domain(s) IPR001356 Homeobox	AT2G46680	45.95	1e-58	AtHB-7	homeobox 7;homeobox 7;homeobox 12	Homeodomain Homeodomain; HALZ Homeobox associated leucine zipper
	Down		Cla012292	Chr6:18995486_18997051(+)	0.101991	2.44616	-4.58401	0.000395661	0.0134837	Soul heme-binding family protein (AHRD V1 ***- D7LZY3_ARALL); contains Interpro domain(s) IPR018790 Protein of unknown function DUF2358	AT5G20140	67.33	2e-71	AtHBP5	SOUL heme-binding family protein;SOUL heme-binding family protein	DUF2358 Uncharacterized conserved protein (DUF2358)
	Down	Down	Cla022714	Chr8:25957925_25959256(-)	1.25928	9.20525	-2.86986	0.000385737	0.0134268	Hydroxycinnamoyl-CoA transferase 2 (AHRD V1 **-* E0XJQ1_CYNSC); contains Interpro domain(s) IPR003480 Transferase	AT1G24430	36.02	3e-94	AtHCT-like	HXXXD-type acyl-transferase family protein;HXXXD-type acyl-transferase family protein;HXXXD-type acyl-transferase family protein	Transferase Transferase family
	Down		Cla005752	Chr11:11152877_11161933(+)	7.71294	38.1345	-2.30575	0.000636363	0.014913	Beta-hexosaminidase 2 (AHRD V1 ***- E6Y3A5_SOLLC); contains Interpro domain(s) IPR001540 Glycoside hydrolase, family 20	AT1G65590	66.48	0	AtHEXO3	beta-hexosaminidase 3;beta-hexosaminidase 1;beta-hexosaminidase 2	Glyco_hydro_20 Glycosyl hydrolase family 20, catalytic domain; Glycohydro_20b2 beta-acetyl hexosaminidase like
	Up		Cla002425	Chr7:23545363_23548967(+)	26.8586	10.7844	1.31644	0.0143823	0.0474791	Homogentisate 1 2-dioxygenase (AHRD V1 ***- D7MTP0_ARALL); contains Interpro domain(s) IPR005708 Homogentisate 1,2-dioxygenase	AT5G54080	81.08	0	AtHGO	homogentisate 1%2C2-dioxygenase;homogentisate 1%2C2-dioxygenase	HgmA homogentisate 1,2-dioxygenase
	Up		Cla020369	Chr5:30419782_30421234(-)	12.0259	4.44419	1.43615	0.00689221	0.0331126	Myb-like transcription factor-like protein (AHRD V1 **-* Q8VZS3_ARATH); contains Interpro domain(s) IPR006447 Myb-like DNA-binding region, SHAQKYF class	AT1G25550	48.96	7e-89	AtHHO3	myb-like transcription factor family protein;myb-like transcription factor family protein;myb-like transcription factor family protein	No hits detected that satisfy reporting thresholds
	Up	Up	Cla005088	Chr3:2994934_2996584(-)	18.1962	4.62778	1.97525	0.000197068	0.0122767	Heavy-metal-associated domain-containing protein (AHRD V1 *-** Q9SJL2_ARATH); contains Interpro domain(s) IPR006121 Heavy metal transport/detoxification protein	AT5G60800	45.78	3e-52	AtHIPP3	Heavy metal transport/detoxification superfamily protein;Heavy metal transport/detoxification superfamily protein;Heavy metal transport/detoxification superfamily protein	HMA Heavy-metal-associated domain
	Up		Cla001204	Chr0:2271821_2273726(-)	33.0604	8.58642	1.94497	0.000374032	0.0133817	3-hydroxy-3-methylglutaryl coenzyme A reductase 1 (AHRD V1 ***- B3VN82_PYRPY); contains Interpro domain(s) IPR004554 Hydroxymethylglutaryl-CoA reductase, class I, catalytic	AT1G76490	70.09	0	AtHMG1	hydroxy methylglutaryl CoA reductase 1;3-hydroxy-3-methylglutaryl-CoA reductase 2	HMG-CoA_red Hydroxymethylglutaryl-coenzyme A reductase
	Down	Down	Cla001148	Chr10:3847890_3852247(+)	45.0028	151.398	-1.75026	0.000476562	0.0138562	Hydroxymethylglutaryl-CoA synthase (AHRD V1 ***- A9ZMZ7_HEVBR); contains Interpro domain(s) IPR010122 Hydroxymethylglutaryl-CoA synthase, eukaryotic	AT4G11820	78.87	0	AtHMGS	hydroxymethylglutaryl-CoA synthase / HMG-CoA synthase / 3-hydroxy-3-methylglutaryl coenzyme A synthase;hydroxymethylglutaryl-CoA synthase / HMG-CoA synthase / 3-hydroxy-3-methylglutaryl coenzyme A synthase;hydroxymethylglutaryl-CoA synthase / HMG-CoA synthase / 3-hydroxy-3-methylglutaryl coenzyme A synthase	HMG_CoA_synt_C Hydroxymethylglutaryl-coenzyme A synthase C terminal; HMG_CoA_synt_N Hydroxymethylglutaryl-coenzyme A synthase N terminal
	Up		Cla017802	Chr10:26285942_26287379(+)	125.598	62.7926	1.00014	0.00482181	0.0284113	Heavy-metal-associated domain-containing protein (AHRD V1 *-** Q9SJL2_ARATH); contains Interpro domain(s) IPR006121 Heavy metal transport/detoxification protein	AT2G36950	35.71	1e-07	ATHMP20	Heavy metal transport/detoxification superfamily protein;Heavy metal transport/detoxification superfamily protein;Heavy metal transport/detoxification superfamily protein	HMA Heavy-metal-associated domain
	Down		Cla002632	Chr3:3979451_3980805(+)	54.0178	136.031	-1.33242	0.000484761	0.0138562	Heavy-metal-associated domain--containing protein (AHRD V1 *-** F4KAE6_ARATH); contains Interpro domain(s) IPR006121 Heavy metal transport/detoxification protein	AT5G50740	59.34	2e-90	ATHMP52	Heavy metal transport/detoxification superfamily protein;Heavy metal transport/detoxification superfamily protein;Heavy metal transport/detoxification superfamily protein	HMA Heavy-metal-associated domain
	Down		Cla021284	Chr5:1820593_1823139(-)	2.28381	5.66938	-1.31175	8.37e-06	0.00718174	Glyoxylate reductase/hydroxypyruvate reductase (AHRD V1 **-- GRHPR_HUMAN); contains Interpro domain(s) IPR006140 D-isomer specific 2-hydroxyacid dehydrogenase, NAD-binding	AT2G45630	55.05	1e-124	AtHPPR4	D-isomer specific 2-hydroxyacid dehydrogenase family protein;D-isomer specific 2-hydroxyacid dehydrogenase family protein;D-isomer specific 2-hydroxyacid dehydrogenase family protein	2-Hacid_dh_C D-isomer specific 2-hydroxyacid dehydrogenase, NAD binding domain; 2-Hacid_dh D-isomer specific 2-hydroxyacid dehydrogenase, catalytic domain
	Down		Cla000713	Chr1:26845739_26847289(+)	9.8351	79.9919	-3.02384	3.02e-05	0.00881891	Heat stress transcription factor (AHRD V1 ***- D4QAU8_CARPA); contains Interpro domain(s) IPR000232 Heat shock factor (HSF)-type, DNA-binding	AT4G36990	51.77	3e-90	AtHSF4	heat shock factor 4;heat shock transcription factor B4;heat shock transcription factor B2A	HSF_DNA-bind HSF-type DNA-binding
	Down		Cla002923	Chr10:21752846_21755033(+)	0.557014	13.1019	-4.55592	0.000849953	0.0161011	Heat stress transcription factor (AHRD V1 ***- D4QAU8_CARPA); contains Interpro domain(s) IPR000232 Heat shock factor (HSF)-type, DNA-binding	AT2G41690	53.6	1e-68	AtHSFB3	heat shock transcription factor B3;heat shock transcription factor B2A;heat shock factor 4	HSF_DNA-bind HSF-type DNA-binding
	Up		Cla005698	Chr10:7636250_7639376(-)	18.5694	8.87324	1.0654	0.00809548	0.0360109	Receptor kinase (AHRD V1 **** D9IAP8_GOSHI); contains Interpro domain(s) IPR002290 Serine/threonine protein kinase	AT5G65710	55.97	0	AtHSL2	HAESA-like 2;HAESA-like 1;Leucine-rich receptor-like protein kinase family protein	Pkinase Protein kinase domain; Pkinase_Tyr Protein tyrosine kinase; LRR_8 Leucine rich repeat; LRR_4 Leucine Rich repeats (2 copies); LRR_1 Leucine Rich Repeat; LRRNT_2 Leucine rich repeat N-terminal domain
	Down		Cla009418	Chr6:6854823_6855332(-)	9.02473	18.3442	-1.02337	0.0156788	0.0498693	Unknown Protein (AHRD V1)	AT4G14830	65.81	6e-43	AtHSP1	17.6 kDa class II heat shock protein;heat shock protein	No hits detected that satisfy reporting thresholds
	Down		Cla003968	Chr7:3002489_3002968(-)	2.3104	6.73798	-1.54417	0.00468989	0.0281295	class I heat shock protein 3 (AHRD V1 ***- B4F976_MAIZE); contains Interpro domain(s) IPR002068 Heat shock protein Hsp20	AT1G53540	74.84	3e-84	AtHSP17.6C	HSP20-like chaperones superfamily protein;heat shock protein 18.2;heat shock protein 17.4	HSP20 Hsp20/alpha crystallin family; ArsA_HSP20 HSP20-like domain found in ArsA
	Down		Cla008197	Chr3:1029373_1029855(-)	10.6374	47.004	-2.14364	0.000462397	0.0138562	class I heat shock protein (AHRD V1 ***- Q69BI7_CARPA); contains Interpro domain(s) IPR002068 Heat shock protein Hsp20	AT1G53540	67.5	2e-73	AtHSP17.6C	HSP20-like chaperones superfamily protein;heat shock protein 18.2;HSP20-like chaperones superfamily protein	HSP20 Hsp20/alpha crystallin family; ArsA_HSP20 HSP20-like domain found in ArsA
	Down		Cla020853	Chr5:26219145_26219618(-)	0.469097	5.2395	-3.48147	0.00454769	0.027983	class II heat shock protein (AHRD V1 ***- D7M4F2_ARALL); contains Interpro domain(s) IPR002068 Heat shock protein Hsp20	AT5G12020	57.14	1e-48	AtHSP17.6II	17.6 kDa class II heat shock protein;heat shock protein 17.6A;HSP20-like chaperones superfamily protein	HSP20 Hsp20/alpha crystallin family; ArsA_HSP20 HSP20-like domain found in ArsA
	Up		Cla017945	Chr10:27430544_27431125(-)	26.3913	13.0397	1.01715	0.00929897	0.0381357	class I heat shock protein (AHRD V1 *-*- Q69BI7_CARPA); contains Interpro domain(s) IPR002068 Heat shock protein Hsp20	AT1G07400	49.01	2e-39	AtHSP17.8	HSP20-like chaperones superfamily protein;HSP20-like chaperones superfamily protein;HSP20-like chaperones superfamily protein	HSP20 Hsp20/alpha crystallin family; ArsA_HSP20 HSP20-like domain found in ArsA
	Down		Cla005645	Chr10:2992879_2993921(+)	32.0125	67.9305	-1.08542	0.00532614	0.0296692	Heat shock protein (AHRD V1 ***- A9QVH3_9FABA); contains Interpro domain(s) IPR008978 HSP20-like chaperone	AT4G25200	56.68	5e-68	AtHSP23.6-MITO	mitochondrion-localized small heat shock protein 23.6;HSP20-like chaperones superfamily protein;heat shock protein 21	HSP20 Hsp20/alpha crystallin family; ArsA_HSP20 HSP20-like domain found in ArsA
	Down		Cla005777	Chr11:11769390_11771609(-)	1.68305	3.69417	-1.13417	0.00470626	0.0281718	heat shock protein (AHRD V1 ***- B2D2G5_CAPSN); contains Interpro domain(s) IPR013126 Heat shock protein 70	AT1G16030	84.57	0	AtHsp70b	heat shock protein 70B;heat shock cognate protein 70-1;heat shock protein 70	HSP70 Hsp70 protein; MreB_Mbl MreB/Mbl protein
	Up		Cla009607	Chr1:31503567_31504909(-)	333.215	137.669	1.27525	0.00119999	0.017824	Aluminum-induced protein (Fragment) (AHRD V1 *--- C6FBW9_PSEMZ)	AT4G27450	66.67	9e-116	AtHUP54	aluminum induced protein with YGL and LRDR motifs;aluminum induced protein with YGL and LRDR motifs;aluminum induced protein with YGL and LRDR motifs	DUF3700 Aluminium induced protein; GATase_7 Glutamine amidotransferase domain
	Down		Cla010175	Chr5:31446423_31447993(+)	0.904484	8.72784	-3.27046	0.00128667	0.0182511	Receptor expression-enhancing protein 5 (AHRD V1 **-- F1LEQ9_ASCSU); contains Interpro domain(s) IPR004345 TB2/DP1 and HVA22 related protein	AT1G69700	62.22	2e-76	AtHVA22C	HVA22 homologue C;HVA22 homologue A;HVA22 homologue A	TB2_DP1_HVA22 TB2/DP1, HVA22 family
	Down		Cla020836	Chr5:26344234_26346941(-)	11.2896	29.814	-1.401	0.00137021	0.0184079	Hexokinase 1 (AHRD V1 ***- B6V3C0_CUCME); contains Interpro domain(s) IPR001312 Hexokinase	AT1G47840	64.96	0	AtHXK3	hexokinase 3;hexokinase 1;hexokinase 2	Hexokinase_2 Hexokinase; Hexokinase_1 Hexokinase
	Up		Cla016004	Chr2:6100199_6102325(+)	12.8656	5.61666	1.19573	0.000264349	0.012665	Kip-related cyclin-dependent kinase inhibitor 6 (AHRD V1 *-*- B9N4X1_POPTR); contains Interpro domain(s) IPR003175 Cyclin-dependent kinase inhibitor	AT1G49620	33.33	3e-08	AtICK5	Cyclin-dependent kinase inhibitor family protein;Cyclin-dependent kinase inhibitor family protein;Cyclin-dependent kinase inhibitor family protein	No hits detected that satisfy reporting thresholds
	Down		Cla017661	Chr10:24989497_24996966(-)	15.1045	36.8446	-1.28647	0.000939583	0.0163498	Iaa-amino acid hydrolase 4 (AHRD V1 *--* B9IIQ5_POPTR); contains Interpro domain(s) IPR010168 Peptidase M20D, amidohydrolase	AT3G02875	43.92	1e-88	AtILR1	Peptidase M20/M25/M40 family protein;peptidase M20/M25/M40 family protein;IAA-leucine resistant (ILR)-like 1	Peptidase_M20 Peptidase family M20/M25/M40; M20_dimer Peptidase dimerisation domain
	Down		Cla013574	Chr2:27913829_27916396(+)	1.42785	5.10521	-1.83812	0.00018911	0.0120999	Regulator of Vps4 activity in the MVB pathway protein (AHRD V1 *--- F4IB75_ARATH); contains Interpro domain(s) IPR005061 Protein of unknown function DUF292, eukaryotic	AT2G14830	51.03	7e-60	AtISTL10	Ist1p;Regulator of Vps4 activity in the MVB pathway protein;Regulator of Vps4 activity in the MVB pathway protein	Ist1 Regulator of Vps4 activity in the MVB pathway
	Up		Cla020300	Chr2:20952402_20952851(+)	68.0712	23.013	1.5646	0.00158513	0.0191108	Chaperone protein dnaJ 11 (AHRD V1 ***- B6U520_MAIZE); contains Interpro domain(s) IPR001623 Heat shock protein DnaJ, N-terminal	AT4G36040	46.96	8e-29	AtJ11	Chaperone DnaJ-domain superfamily protein;Chaperone DnaJ-domain superfamily protein;Chaperone DnaJ-domain superfamily protein	DnaJ DnaJ domain
	Up		Cla017219	Chr10:18547805_18549101(+)	128.136	49.8492	1.36203	0.00222395	0.021532	Chaperone protein dnaJ 8, chloroplastic (AHRD V1 *-*- DNAJ8_ARATH); contains Interpro domain(s) IPR001623 Heat shock protein DnaJ, N-terminal	AT1G80920	51.08	2e-43	AtJ8	Chaperone DnaJ-domain superfamily protein	DnaJ DnaJ domain
	Up		Cla012536	Chr7:23895841_23896660(+)	42.5869	20.0585	1.0862	0.000720794	0.0154846	Protein TIFY 7 (AHRD V1 *--- F4I6W0_ARATH); contains Interpro domain(s) IPR010399 Tify	AT1G72450	36.7	2e-28	AtJAZ6	jasmonate-zim-domain protein 6;TIFY domain/Divergent CCT motif family protein;jasmonate-zim-domain protein 5	tify tify domain; CCT_2 Divergent CCT motif
	Up		Cla019575	Chr3:7148182_7148833(-)	4.74773	2.26087	1.07036	0.00149771	0.0189293	Protein TIFY 5B (AHRD V1 ***- TIF5B_ARATH); contains Interpro domain(s) IPR010399 Tify	AT1G30135	39.46	3e-17	AtJAZ8	jasmonate-zim-domain protein 8;jasmonate-zim-domain protein 7;TIFY domain/Divergent CCT motif family protein	tify tify domain; CCT_2 Divergent CCT motif
	Down		Cla017158	Chr10:19300953_19302338(-)	0.047457	30.1381	-9.31075	0.00153875	0.0189334	3-ketoacyl-CoA synthase (AHRD V1 ***- B9STG6_RICCO); contains Interpro domain(s) IPR012392 Very-long-chain 3-ketoacyl-CoA synthase	AT1G71160	63.55	0	AtKCS7	3-ketoacyl-CoA synthase 7;3-ketoacyl-CoA synthase 5;3-ketoacyl-CoA synthase 4	FAE1_CUT1_RppA FAE1/Type III polyketide synthase-like protein; ACP_syn_III_C 3-Oxoacyl-[acyl-carrier-protein (ACP)] synthase III C terminal; Chal_sti_synt_C Chalcone and stilbene synthases, C-terminal domain; Chal_sti_synt_N Chalcone and stilbene synthases, N-terminal domain
	Up		Cla019272	Chr6:26584310_26587105(+)	140.573	47.2533	1.57283	8.54e-05	0.00997891	5&apos-AMP-activated protein kinase subunit gamma-3 (AHRD V1 *--- B1PM77_SHEEP); contains Interpro domain(s) IPR000644 Cystathionine beta-synthase, core	AT3G48530	74.2	0	AtKING1	SNF1-related protein kinase regulatory subunit gamma 1;Cystathionine beta-synthase (CBS) protein;Cystathionine beta-synthase (CBS) protein	CBS CBS domain
	Up		Cla003168	Chr2:33941160_33942203(+)	153.148	61.8089	1.30904	0.00269026	0.0231108	Kelch-like protein 14 (AHRD V1 ***- B6T7I5_MAIZE); contains Interpro domain(s) IPR015915 Kelch-type beta propeller	AT2G44130	37.07	3e-61	AtKMD3	Galactose oxidase/kelch repeat superfamily protein;Galactose oxidase/kelch repeat superfamily protein;Galactose oxidase/kelch repeat superfamily protein	Kelch_1 Kelch motif; Kelch_6 Kelch motif; Kelch_3 Galactose oxidase, central domain; Kelch_4 Galactose oxidase, central domain; Kelch_2 Kelch motif; F-box-like F-box-like
	Up		Cla017570	Chr10:24092697_24093713(+)	13.8019	2.80727	2.29763	0.00297035	0.0238002	Kelch-like protein 18 (AHRD V1 *-*- KLH18_HUMAN); contains Interpro domain(s) IPR015915 Kelch-type beta propeller	AT2G44130	38.73	5e-59	AtKMD3	Galactose oxidase/kelch repeat superfamily protein;Galactose oxidase/kelch repeat superfamily protein;Galactose oxidase/kelch repeat superfamily protein	Kelch_1 Kelch motif; Kelch_6 Kelch motif; Kelch_3 Galactose oxidase, central domain; Kelch_4 Galactose oxidase, central domain; Kelch_2 Kelch motif; Kelch_5 Kelch motif
	Up		Cla021001	Chr5:24664373_24668813(+)	49.5485	24.4797	1.01726	0.0135734	0.0461524	Homeobox protein knotted-1-like 3 (AHRD V1 ***- F4JWP8_ARATH); contains Interpro domain(s) IPR005541 KNOX2	AT5G25220	64.93	0	AtKNAT3	homeobox protein knotted-1-like 3;homeobox protein knotted-1-like 3;homeobox protein knotted-1-like 4	KNOX2 KNOX2 domain; KNOX1 KNOX1 domain; Homeobox_KN Homeobox KN domain
	Down	Down	Cla012378	Chr8:2655120_2656116(+)	1.30672	144.791	-6.79188	0.00120477	0.017824	Beta-1 3-galactosyltransferase 6 (AHRD V1 *--- B6UBH3_MAIZE); contains Interpro domain(s) IPR002659 Glycosyl transferase, family 31	AT1G33430	60.17	2e-87	AtKNS4	Galactosyltransferase family protein;Galactosyltransferase family protein;Galactosyltransferase family protein	Galactosyl_T Galactosyltransferase; DUF4094 Domain of unknown function (DUF4094)
	Down		Cla008149	Chr3:543472_548048(-)	4.41665	14.9273	-1.75692	0.00371682	0.0258722	Potassium transporter 2 (AHRD V1 ***- B6U7Z6_MAIZE); contains Interpro domain(s) IPR018519 Potassium uptake protein, kup IPR003855 K+ potassium transporter	AT2G30070	67.72	0	AtKT1	potassium transporter 1;potassium transporter 1;K+ uptake permease 6	K_trans K+ potassium transporter
	Up		Cla011176	Chr3:25986791_25987324(+)	16.9467	8.19612	1.04799	0.000783261	0.015599	RING zinc finger protein (AHRD V1 **** F8RNK2_AMAHP); contains Interpro domain(s) IPR018957 Zinc finger, C3HC4 RING-type	AT1G04360	33.78	2e-22	ATL1	RING/U-box superfamily protein;RING/U-box superfamily protein;RING/U-box superfamily protein	zf-RING_2 Ring finger domain; zf-RING_11 RING-like zinc finger; zf-C3HC4_2 Zinc finger, C3HC4 type (RING finger); zf-rbx1 RING-H2 zinc finger domain; zf-C3HC4 Zinc finger, C3HC4 type (RING finger)
	Down		Cla012558	Chr7:24063332_24064180(-)	2.18998	9.17039	-2.06606	0.00200754	0.0208011	RING-H2 zinc finger protein (AHRD V1 **** Q0WT62_ARATH); contains Interpro domain(s) IPR018957 Zinc finger, C3HC4 RING-type	AT1G72310	39.35	1e-57	ATL3	RING/U-box superfamily protein;RING/U-box superfamily protein;TOXICOS EN LEVADURA 2	zf-RING_2 Ring finger domain; zf-C3HC4_2 Zinc finger, C3HC4 type (RING finger); zf-RING_11 RING-like zinc finger; zf-rbx1 RING-H2 zinc finger domain; zf-C3HC4 Zinc finger, C3HC4 type (RING finger)
	Down		Cla001059	Chr1:11774401_11775465(-)	3.28216	12.6225	-1.94328	0.00309964	0.0239389	RING finger protein (AHRD V1 ***- C6EUD3_SOYBN); contains Interpro domain(s) IPR018957 Zinc finger, C3HC4 RING-type	AT5G40250	48.94	2e-98	ATL46	RING/U-box superfamily protein;RING/U-box superfamily protein;hypoxia-responsive family protein / zinc finger (C3HC4-type RING finger) family protein	zf-RING_2 Ring finger domain; zf-RING_11 RING-like zinc finger; zf-rbx1 RING-H2 zinc finger domain; zf-C3HC4_2 Zinc finger, C3HC4 type (RING finger); zf-C3HC4 Zinc finger, C3HC4 type (RING finger)
	Down		Cla010263	Chr9:29536555_29539552(-)	2.33208	5.08397	-1.12434	0.00562215	0.0302384	RNA-binding protein (AHRD V1 **-* Q9LHL3_ARATH); contains Interpro domain(s) IPR006630 RNA-binding protein Lupus La	AT3G19090	47.29	1e-116	AtLARP6C	RNA-binding protein;RNA-binding protein;RNA-binding protein	La La domain; RRM_1 RNA recognition motif. (a.k.a. RRM, RBD, or RNP domain)
	Up		Cla005052	Chr3:2602699_2604207(-)	41.8166	17.0229	1.2966	0.00214559	0.0212902	LOB domain protein 1 (AHRD V1 ***- D7KHW8_ARALL); contains Interpro domain(s) IPR004883 Lateral organ boundaries, LOB	AT1G07900	73.73	3e-61	AtLBD1	LOB domain-containing protein 1;LOB domain-containing protein 11;Lateral organ boundaries (LOB) domain family protein	LOB Lateral organ boundaries (LOB) domain
	Down		Cla001587	Chr2:15746393_15747085(+)	1.71305	94.3576	-5.7835	0.0126419	0.0445472	LOB domain family protein (AHRD V1 *-*- D7KR59_ARALL); contains Interpro domain(s) IPR004883 Lateral organ boundaries, LOB	AT1G06280	50.98	6e-45	AtLBD2	LOB domain-containing protein 2;LOB domain-containing protein 22;LOB domain-containing protein 7	LOB Lateral organ boundaries (LOB) domain
	Down		Cla002917	Chr10:21832731_21834908(-)	0.260205	12.7237	-5.61173	0.000393256	0.0134837	LOB domain protein 20 (AHRD V1 ***- D7L194_ARALL); contains Interpro domain(s) IPR004883 Lateral organ boundaries, LOB	AT3G03760	57.81	5e-74	AtLBD20	LOB domain-containing protein 20;lateral organ boundaries-domain 16;LOB domain-containing protein 18	LOB Lateral organ boundaries (LOB) domain
	Down		Cla022679	Chr8:25679885_25680451(-)	2.17398	5.23688	-1.26837	0.00730433	0.0340709	LOB domain family protein (AHRD V1 *-*- D7L292_ARALL); contains Interpro domain(s) IPR004883 Lateral organ boundaries, LOB	AT3G13850	47.22	1e-26	AtLBD22	LOB domain-containing protein 22;LOB domain-containing protein 27;LOB domain-containing protein 7	LOB Lateral organ boundaries (LOB) domain
	Down		Cla013469	Chr2:29045155_29047301(+)	2.17189	5.46673	-1.33173	0.00322527	0.0243563	LOB domain protein 4 (AHRD V1 ***- D7KL24_ARALL); contains Interpro domain(s) IPR004883 Lateral organ boundaries, LOB	AT1G31320	70.86	2e-68	AtLBD4	LOB domain-containing protein 4;ASYMMETRIC LEAVES 2-like 9;Lateral organ boundaries (LOB) domain family protein	LOB Lateral organ boundaries (LOB) domain
	Down		Cla021727	Chr5:5694836_5696169(+)	0.34941	9.20848	-4.71997	0.000589563	0.0144891	1-aminocyclopropane-1-carboxylate oxidase 3 (AHRD V1 **-- ACCO3_ARATH); contains Interpro domain(s) IPR005123 Oxoglutarate and iron-dependent oxygenase	AT3G21420	70.17	0	AtLBO1	2-oxoglutarate (2OG) and Fe(II)-dependent oxygenase superfamily protein;senescence-related gene 1;2-oxoglutarate (2OG) and Fe(II)-dependent oxygenase superfamily protein	DIOX_N non-haem dioxygenase in morphine synthesis N-terminal; 2OG-FeII_Oxy 2OG-Fe(II) oxygenase superfamily
	Down	Down	Cla012995	Chr9:22702513_22705144(+)	24.1415	69.5313	-1.52615	0.000497375	0.0138734	Nogo-B receptor (AHRD V1 **-- B5X0Q7_SALSA); contains Interpro domain(s) IPR001441 Di-trans-poly-cis-decaprenylcistransferase-like	AT1G11755	55.04	9e-42	AtLEW1	Undecaprenyl pyrophosphate synthetase family protein	No hits detected that satisfy reporting thresholds
	Up		Cla011145	Chr3:25723427_25726459(+)	22.9105	9.8638	1.21579	0.00141522	0.0184994	Chlorophyll a-b binding protein, chloroplastic (AHRD V1 ***- CB12_PETHY); contains Interpro domain(s) IPR001344 Chlorophyll A-B binding protein	AT1G19150	72.73	1e-126	AtLHCA6	PSI type II chlorophyll a/b-binding protein (Lhca2-1);photosystem I light harvesting complex protein;light-harvesting chlorophyll-protein complex I subunit A4	Chloroa_b-bind Chlorophyll A-B binding protein
	Down		Cla019489	Chr3:5825297_5827946(-)	0.116927	2.70276	-4.53076	0.00217685	0.0213395	Lysine/histidine transporter (AHRD V1 ***- B9GJB7_POPTR); contains Interpro domain(s) IPR013057 Amino acid transporter, transmembrane	AT5G40780	74.6	0	AtLHT1	lysine histidine transporter 1;lysine histidine transporter 2;lysine histidine transporter 1	Aa_trans Transmembrane amino acid transporter protein; Trp_Tyr_perm Tryptophan/tyrosine permease family
	Up		Cla008733	Chr2:31463036_31465701(-)	126.751	60.6473	1.06348	0.00473651	0.0282214	Cytokinin riboside 5&apos-monophosphate phosphoribohydrolase LOG3 (AHRD V1 **-- F4IQ18_ARATH); contains Interpro domain(s) IPR005269 Conserved hypothetical protein CHP00730	AT2G28305	87.44	4e-135	AtLOG1	Putative lysine decarboxylase family protein;lysine decarboxylase family protein;Putative lysine decarboxylase family protein	Lysine_decarbox Possible lysine decarboxylase; LDcluster4 SLOG cluster4 family
	Up		Cla015542	Chr9:581154_585338(-)	40.6838	19.255	1.07922	0.00298843	0.0238148	Lipoxygenase (AHRD V1 ***- Q6X5R5_NICAT); contains Interpro domain(s) IPR013819 Lipoxygenase, C-terminal IPR000907 Lipoxygenase	AT1G17420	71.53	0	AtLOX3	lipoxygenase 3;PLAT/LH2 domain-containing lipoxygenase family protein;PLAT/LH2 domain-containing lipoxygenase family protein	Lipoxygenase Lipoxygenase; PLAT PLAT/LH2 domain
	Down	Down	Cla022987	Chr11:16214820_16219598(+)	39.6278	89.8466	-1.18095	0.00578736	0.030568	Lipoxygenase (AHRD V1 ***- D7TAQ3_VITVI); contains Interpro domain(s) IPR013819 Lipoxygenase, C-terminal IPR000907 Lipoxygenase	AT1G67560	67.81	0	AtLOX6	PLAT/LH2 domain-containing lipoxygenase family protein;lipoxygenase 3;PLAT/LH2 domain-containing lipoxygenase family protein	Lipoxygenase Lipoxygenase
	Down		Cla018982	Chr6:24070178_24071021(-)	0.237242	32.3165	-7.08977	0.000116438	0.0105099	Non-specific lipid-transfer protein (AHRD V1 *-** B8LM50_PICSI); contains Interpro domain(s) IPR013770 Plant lipid transfer protein and hydrophobic protein, helical	AT1G73890	45.45	1e-21	AtLPTG10	Bifunctional inhibitor/lipid-transfer protein/seed storage 2S albumin superfamily protein;Bifunctional inhibitor/lipid-transfer protein/seed storage 2S albumin superfamily protein;Bifunctional inhibitor/lipid-transfer protein/seed storage 2S albumin superfamily protein	LTP_2 Probable lipid transfer
	Down	Down	Cla021161	Chr5:859109_859471(+)	0.915313	2990.6	-11.6739	4.2e-05	0.00976752	Non-specific lipid-transfer protein (AHRD V1 **** B9I8X5_POPTR); contains Interpro domain(s) IPR013770 Plant lipid transfer protein and hydrophobic protein, helical	AT5G59310	35.65	5e-12	AtLTP4	lipid transfer protein 4;lipid transfer protein;lipid transfer protein	LTP_2 Probable lipid transfer; Tryp_alpha_amyl Protease inhibitor/seed storage/LTP family
	Up		Cla021574	Chr5:4287860_4291696(-)	10.5989	5.18692	1.03097	0.00910902	0.037799	Wall-associated receptor kinase-like 18 (AHRD V1 *-** WAKLN_ARATH); contains Interpro domain(s) IPR002290 Serine/threonine protein kinase	AT2G23770	34.96	2e-90	AtLYK4	protein kinase family protein / peptidoglycan-binding LysM domain-containing protein;Protein kinase superfamily protein;chitin elicitor receptor kinase 1	Pkinase Protein kinase domain; Pkinase_Tyr Protein tyrosine kinase; LysM LysM domain
	Down		Cla020109	Chr2:23573464_23577270(-)	0.555895	2.89316	-2.37976	0.0067714	0.0328522	Esterase/lipase/thioesterase family protein (AHRD V1 **-- D7LD44_ARALL); contains Interpro domain(s) IPR000073 Alpha/beta hydrolase fold-1	AT2G39420	69.75	4e-169	AtMAGL8	alpha/beta-Hydrolases superfamily protein;alpha/beta-Hydrolases superfamily protein;alpha/beta-Hydrolases superfamily protein	Hydrolase_4 Serine aminopeptidase, S33; Abhydrolase_1 alpha/beta hydrolase fold; Abhydrolase_6 Alpha/beta hydrolase family; Peptidase_S9 Prolyl oligopeptidase family
	Up		Cla018246	Chr4:20153491_20154678(-)	3.18116	0.985082	1.69124	0.000527248	0.014066	Unknown Protein (AHRD V1)	AT2G39370	34.59	7e-30	AtMAKR4	membrane-associated kinase regulator;membrane-associated kinase regulator	No hits detected that satisfy reporting thresholds
	Down	Down	Cla020782	Chr5:26829228_26831913(-)	33.8861	76.559	-1.17588	0.00188901	0.0203188	Mannan endo-1 4-beta-mannosidase (AHRD V1 ***- F5ANH2_LEPSV); contains Interpro domain(s) IPR001547 Glycoside hydrolase, family 5	AT5G66460	64.27	0	AtMAN7	Glycosyl hydrolase superfamily protein;Glycosyl hydrolase superfamily protein;Glycosyl hydrolase superfamily protein	Cellulase Cellulase (glycosyl hydrolase family 5)
	Up		Cla010453	Chr2:10646222_10647529(+)	4.03411	1.98684	1.02177	0.0077763	0.0352892	Protein serine/threonine kinase (AHRD V1 *-** D3BP85_POLPA); contains Interpro domain(s) IPR002290 Serine/threonine protein kinase	AT2G32510	53.56	6e-112	AtMAPKKK17	mitogen-activated protein kinase kinase kinase 17;mitogen-activated protein kinase kinase kinase 18;mitogen-activated protein kinase kinase kinase 15	Pkinase Protein kinase domain; Pkinase_Tyr Protein tyrosine kinase
	Up		Cla002794	Chr3:11001725_11003367(-)	8.22992	0.62217	3.7255	0.00143287	0.0185128	Mei2-like protein (AHRD V1 *--- Q8S3W5_HORVD); contains Interpro domain(s) IPR007201 RNA recognition motif 2	AT1G37140	46.06	2e-38	AtMCT1	MEI2 C-terminal RRM only like 1;terminal EAR1-like 1;terminal EAR1-like 2	RRM_2 RNA recognition motif 2
	Down		Cla003206	Chr2:33642972_33645287(+)	1.84924	5.49997	-1.57249	0.00176048	0.0198649	Phosphoribosyltransferase (Fragment) (AHRD V1 *--- Q8LSY7_SEQSE); contains Interpro domain(s) IPR013583 Phosphoribosyltransferase C-terminal, plant	AT3G57880	82.31	0	AtMCTP3	Calcium-dependent lipid-binding (CaLB domain) plant phosphoribosyltransferase family protein;Calcium-dependent lipid-binding (CaLB domain) plant phosphoribosyltransferase family protein;Calcium-dependent lipid-binding (CaLB domain) plant phosphoribosyltransferase family protein	PRT_C Plant phosphoribosyltransferase C-terminal; C2 C2 domain; Pex24p Integral peroxisomal membrane peroxin
	Up		Cla009844	Chr1:33429301_33430959(-)	5.15415	1.55181	1.73178	0.00206781	0.0209636	FAD-binding domain-containing protein (AHRD V1 **-- D7MMH5_ARALL); contains Interpro domain(s) IPR006094 FAD linked oxidase, N-terminal	AT2G34790	67.3	0	AtMEE23	FAD-binding Berberine family protein;FAD-binding Berberine family protein;FAD-binding Berberine family protein	FAD_binding_4 FAD binding domain; BBE Berberine and berberine like
	Down		Cla017404	Chr10:16064658_16069681(+)	6.25474	22.487	-1.84607	0.00274875	0.0233523	Sodium-calcium exchanger 3 (Fragment) (AHRD V1 *--- Q9EPU8_MOUSE); contains Interpro domain(s) IPR004837 Sodium/calcium exchanger membrane region	AT2G47600	71.4	0	AtMHX	magnesium/proton exchanger	Na_Ca_ex Sodium/calcium exchanger protein
	Down		Cla016814	Chr11:25129773_25134704(-)	4.28236	8.97737	-1.06789	0.00656609	0.0324933	Inositol oxygenase 1 (AHRD V1 ***- F4HW72_ARATH); contains Interpro domain(s) IPR007828 Protein of unknown function DUF706	AT2G19800	75.16	2e-170	AtMIOX2	myo-inositol oxygenase 2;myo-inositol oxygenase 4;myo-inositol oxygenase 4	MIOX Myo-inositol oxygenase
	Down		Cla001012	Chr8:11652980_11656861(+)	7.58717	15.2986	-1.01177	0.00547589	0.0300231	DNA mismatch repair protein mutL (AHRD V1 **** E9D2C4_COCPS); contains Interpro domain(s) IPR011186 DNA mismatch repair protein Mlh1	AT4G09140	76.64	0	AtMLH1	MUTL-homologue 1;MUTL-homologue 1;DNA mismatch repair protein	DNA_mis_repair DNA mismatch repair protein, C-terminal domain; HATPase_c_3 Histidine kinase-, DNA gyrase B-, and HSP90-like ATPase; HATPase_c Histidine kinase-, DNA gyrase B-, and HSP90-like ATPase
	Up		Cla013184	Chr5:12410731_12413160(+)	11.3167	3.57771	1.66134	0.00655233	0.032449	Major latex-like protein 1 (AHRD V1 **-- Q5ZF57_PLAMJ); contains Interpro domain(s) IPR000916 Bet v I allergen	AT1G70830	36.05	9e-20	AtMLP28	MLP-like protein 28;MLP-like protein 28;MLP-like protein 28	Bet_v_1 Pathogenesis-related protein Bet v I family
	Down		Cla013183	Chr5:12348797_12351519(-)	0.233453	8.03103	-5.10438	0.00044013	0.0136976	Major latex-like protein 1 (AHRD V1 **-- Q5ZF57_PLAMJ); contains Interpro domain(s) IPR000916 Bet v I allergen	AT1G70850	30.67	2e-16	AtMLP34	MLP-like protein 31;MLP-like protein 28;MLP-like protein 28	Bet_v_1 Pathogenesis-related protein Bet v I family
	Up		Cla023335	Chr11:19704993_19706357(+)	10.1039	3.51614	1.52285	0.000380152	0.0133834	G-type lectin S-receptor-like serine/threonine-protein kinase At1g11305 (AHRD V1 *-*- Y1135_ARATH); contains Interpro domain(s) IPR001480 Curculin-like (mannose-binding) lectin	AT1G78830	62.2	0	AtMNB1	Curculin-like (mannose-binding) lectin family protein;D-mannose binding lectin protein with Apple-like carbohydrate-binding domain-containing protein;D-mannose binding lectin protein with Apple-like carbohydrate-binding domain-containing protein	B_lectin D-mannose binding lectin
	Down		Cla004792	Chr3:24094599_24097523(-)	5.71655	27.4577	-2.264	0.000431936	0.0136765	Enoyl- (AHRD V1 ***- Q93X66_BRANA); contains Interpro domain(s) IPR014358 Enoyl-[acyl-carrier-protein] reductase (NADH)	AT2G05990	70.34	0	AtMOD1	NAD(P)-binding Rossmann-fold superfamily protein;NAD(P)-binding Rossmann-fold superfamily protein;NAD(P)-binding Rossmann-fold superfamily protein	adh_short_C2 Enoyl-(Acyl carrier protein) reductase; adh_short short chain dehydrogenase
	Down		Cla010878	Chr7:30699608_30706884(-)	1.86865	5.865	-1.65014	0.00438989	0.0275443	MORC family CW-type zinc finger protein 4 (AHRD V1 *--- A1YR23_HUMAN); contains Interpro domain(s) IPR003594 ATP-binding region, ATPase-like	AT4G24970	66.8	0	ATMORC7	Histidine kinase-%2C DNA gyrase B-%2C and HSP90-like ATPase family protein;Histidine kinase-%2C DNA gyrase B-%2C and HSP90-like ATPase family protein;Histidine kinase-%2C DNA gyrase B-%2C and HSP90-like ATPase family protein	Morc6_S5 Morc6 ribosomal protein S5 domain 2-like; HATPase_c_3 Histidine kinase-, DNA gyrase B-, and HSP90-like ATPase
	Down		Cla017558	Chr10:23922309_23925594(+)	2.33226	7.18137	-1.62253	0.00243118	0.0222354	Receptor-like kinase (AHRD V1 **** A7VM24_MARPO); contains Interpro domain(s) IPR002290 Serine/threonine protein kinase	AT2G41970	81.64	0	AtMRI	Protein kinase superfamily protein;Protein kinase superfamily protein;Protein kinase superfamily protein	Pkinase_Tyr Protein tyrosine kinase; Pkinase Protein kinase domain
	Down	Down	Cla000029	Chr0:584873_587461(+)	1.99825	128.31	-6.00475	0.00801404	0.0357985	PHD-finger family protein expressed (AHRD V1 ***- Q8W342_ORYSJ)	AT5G22260	48.54	9e-128	AtMs1	RING/FYVE/PHD zinc finger superfamily protein;RING/FYVE/PHD zinc finger superfamily protein;RING/FYVE/PHD zinc finger superfamily protein	No hits detected that satisfy reporting thresholds
	Down	Down	Cla016893	Chr11:25811813_25812148(+)	0.188817	12.5106	-6.05002	0.00363331	0.0256645	PHD finger protein MALE STERILITY 1 (AHRD V1 ***- MS1_ARATH)	AT5G22260	50	2e-22	AtMs1	No Hits	No hits detected that satisfy reporting thresholds
	Down		Cla016896	Chr11:25844397_25844732(-)	0.284325	13.7395	-5.59464	0.00351106	0.0254192	PHD finger protein MALE STERILITY 1 (AHRD V1 ***- MS1_ARATH)	AT5G22260	50	2e-22	AtMs1	No Hits	No hits detected that satisfy reporting thresholds
	Down		Cla004450	Chr10:4615148_4616284(-)	4.2231	89.3917	-4.40377	0.00151701	0.0189334	MYB transcription factor (AHRD V1 *--* Q6R077_ARATH); contains Interpro domain(s) IPR015495 Myb transcription factor	AT5G56110	88.3	6e-111	AtMS188/MYB80	myb domain protein 103;myb domain protein 74;myb domain protein 41	Myb_DNA-binding Myb-like DNA-binding domain; Myb_DNA-bind_6 Myb-like DNA-binding domain
	Up		Cla003669	Chr1:5854375_5863003(-)	3.18671	1.02566	1.63552	0.00577839	0.0305565	DNA mismatch repair protein mutS (AHRD V1 **** B2W010_PYRTR); contains Interpro domain(s) IPR000432 DNA mismatch repair protein MutS, C-terminal	AT4G17380	77.54	0	AtMSH4	MUTS-like protein 4;MUTS-like protein 4;MUTS homolog 2	MutS_V MutS domain V; MutS_III MutS domain III; MutS_IV MutS family domain IV
	Up		Cla005358	Chr10:5378049_5388479(-)	4.72104	1.30085	1.85965	0.000503281	0.0138841	DNA mismatch repair protein mutS (AHRD V1 *-** D9QQ87_ACEAZ); contains Interpro domain(s) IPR000432 DNA mismatch repair protein MutS, C-terminal	AT3G20475	60.25	0	AtMSH5	MUTS-homologue 5;MUTS-homologue 5;MUTS-homologue 5	MutS_V MutS domain V
	Down		Cla015800	Chr2:3672419_3676316(+)	1.21952	12.0874	-3.30912	0.00221121	0.021532	Mechanosensitive ion channel family (AHRD V1 *-*- B6QJY9_PENMQ); contains Interpro domain(s) IPR016688 Membrane protein, At2g17000, predicted	AT1G78610	55.86	0	AtMSL6	mechanosensitive channel of small conductance-like 6;Mechanosensitive ion channel family protein;mechanosensitive channel of small conductance-like 5	MS_channel Mechanosensitive ion channel
	Up		Cla016847	Chr11:25412880_25414628(-)	7.81362	3.76703	1.05256	0.000997106	0.0167273	Threonine synthase (AHRD V1 **** Q2Q021_SOYBN); contains Interpro domain(s) IPR004450 Threonine synthase	AT4G29840	78.36	0	AtMTO2	Pyridoxal-5&apos;-phosphate-dependent enzyme family protein;Pyridoxal-5&apos;-phosphate-dependent enzyme family protein	PALP Pyridoxal-phosphate dependent enzyme
	Down		Cla007663	Chr2:136121_138099(+)	0.0609353	5.69622	-6.54658	0.00192607	0.0205394	Myb-related transcription factor (AHRD V1 *--* B7UCQ7_PANGI); contains Interpro domain(s) IPR015495 Myb transcription factor	AT2G32460	38.76	3e-84	AtMYB101	myb domain protein 101;myb domain protein 101;myb domain protein 33	Myb_DNA-binding Myb-like DNA-binding domain; Myb_DNA-bind_6 Myb-like DNA-binding domain
	Up		Cla010193	Chr5:31333372_31335482(+)	14.7521	5.22757	1.49671	0.00101312	0.0168177	MYB transcription factor (AHRD V1 *-** Q9C5P9_ARATH); contains Interpro domain(s) IPR015495 Myb transcription factor	AT1G69560	74.17	4e-74	AtMYB105	myb domain protein 105;myb domain protein 105;myb domain protein 117	Myb_DNA-binding Myb-like DNA-binding domain; Myb_DNA-bind_6 Myb-like DNA-binding domain
	Down		Cla010413	Chr9:31388005_31389474(-)	5.86675	24.6486	-2.07087	0.00399576	0.0265924	MYB transcription factor (AHRD V1 **** Q9SPG9_ARATH); contains Interpro domain(s) IPR015495 Myb transcription factor	AT5G40350	59.2	2e-77	AtMYB24	myb domain protein 24;myb domain protein 21;myb domain protein 57	Myb_DNA-binding Myb-like DNA-binding domain; Myb_DNA-bind_6 Myb-like DNA-binding domain
	Down		Cla012590	Chr7:24306363_24307941(-)	0.421198	2.34456	-2.47675	0.00176105	0.0198649	MYB transcription factor (AHRD V1 *--* Q9LVL0_ARATH); contains Interpro domain(s) IPR015495 Myb transcription factor	AT3G13890	67.88	5e-79	AtMYB26	myb domain protein 26;myb domain protein 26;myb domain protein 61	Myb_DNA-binding Myb-like DNA-binding domain; Myb_DNA-bind_6 Myb-like DNA-binding domain
	Down		Cla003566	Chr1:4923858_4925042(+)	2.73122	207.566	-6.24788	6.04e-05	0.00976752	MYB transcription factor (AHRD V1 *-** Q4L214_MAIZE); contains Interpro domain(s) IPR015495 Myb transcription factor	AT4G12350	87.5	5e-85	AtMYB42	myb domain protein 42;myb domain protein 85;myb domain protein 43	Myb_DNA-binding Myb-like DNA-binding domain; Myb_DNA-bind_6 Myb-like DNA-binding domain
	Down		Cla011345	Chr1:1490069_1490918(+)	0.6234	4.44433	-2.83373	0.00477741	0.0283555	MYB transcription factor (AHRD V1 *--* D0VYJ9_DIOKA); contains Interpro domain(s) IPR015495 Myb transcription factor	AT3G13540	73.04	6e-61	AtMYB5	myb domain protein 5;myb domain protein 111;myb domain protein 4	Myb_DNA-binding Myb-like DNA-binding domain; Myb_DNA-bind_6 Myb-like DNA-binding domain
	Down		Cla019999	Chr2:25025952_25027283(-)	2.5518	5.62563	-1.1405	0.00521394	0.0293952	MYB transcription factor (AHRD V1 *--* B4FF63_MAIZE); contains Interpro domain(s) IPR015495 Myb transcription factor	AT1G57560	55.02	8e-86	AtMYB50	myb domain protein 50;myb domain protein 55;myb domain protein 50	Myb_DNA-binding Myb-like DNA-binding domain; Myb_DNA-bind_6 Myb-like DNA-binding domain
	Down		Cla018657	Chr4:24039901_24040706(+)	0.315175	4.6246	-3.8751	0.00026521	0.012665	MYB transcription factor (AHRD V1 **** B9I4W4_POPTR); contains Interpro domain(s) IPR015495 Myb transcription factor	AT1G17950	51.35	6e-78	AtMYB52	myb domain protein 52;myb domain protein 54;myb domain protein 54	Myb_DNA-binding Myb-like DNA-binding domain; Myb_DNA-bind_6 Myb-like DNA-binding domain
	Up		Cla022660	Chr8:25499664_25501221(+)	3.43223	1.04323	1.71808	0.0156997	0.0498926	MYB transcription factor (AHRD V1 *--* Q9T066_ARATH); contains Interpro domain(s) IPR015495 Myb transcription factor	AT5G65790	75.21	2e-61	AtMYB68	myb domain protein 68;Duplicated homeodomain-like superfamily protein;Duplicated homeodomain-like superfamily protein	Myb_DNA-binding Myb-like DNA-binding domain; Myb_DNA-bind_6 Myb-like DNA-binding domain
	Down		Cla004362	Chr7:5095273_5096094(-)	5.7408	27.0455	-2.23606	4.26e-05	0.00976752	MYB transcription factor (AHRD V1 *-** B4FMQ3_MAIZE); contains Interpro domain(s) IPR015495 Myb transcription factor	AT4G37260	48.31	1e-48	AtMYB73	myb domain protein 73;myb domain protein 109;myb domain protein 70	Myb_DNA-binding Myb-like DNA-binding domain; Myb_DNA-bind_6 Myb-like DNA-binding domain
	Up		Cla006761	Chr2:8804391_8805317(+)	54.4743	23.1884	1.23217	0.00232073	0.0218739	MYB transcription factor (AHRD V1 **** A3F8D7_CAPAN); contains Interpro domain(s) IPR015495 Myb transcription factor	AT4G37260	51.33	1e-88	AtMYB73	myb domain protein 73;myb domain protein r1;myb domain protein 70	Myb_DNA-binding Myb-like DNA-binding domain; Myb_DNA-bind_6 Myb-like DNA-binding domain
	Up		Cla020633	Chr5:28144577_28145407(+)	71.286	28.4797	1.32368	0.000541987	0.0140675	MYB transcription factor (AHRD V1 **-* A3F8D7_CAPAN); contains Interpro domain(s) IPR015495 Myb transcription factor	AT4G37260	46.32	3e-81	AtMYB73	myb domain protein 73;myb domain protein r1;myb domain protein 77	Myb_DNA-binding Myb-like DNA-binding domain; Myb_DNA-bind_6 Myb-like DNA-binding domain
	Up		Cla021810	Chr5:6470072_6471183(-)	5.73725	2.21138	1.37541	0.000437792	0.0136976	MYB transcription factor (AHRD V1 *-** Q39550_CRAPL); contains Interpro domain(s) IPR015495 Myb transcription factor	AT5G49620	55.7	1e-89	AtMYB78	myb domain protein 78;myb domain protein 78;myb domain protein 108	Myb_DNA-binding Myb-like DNA-binding domain; Myb_DNA-bind_6 Myb-like DNA-binding domain
	Down		Cla014058	Chr1:27774930_27776082(-)	4.60963	29.1069	-2.65864	0.000506922	0.0138841	MYB transcription factor (AHRD V1 *--* Q9T066_ARATH); contains Interpro domain(s) IPR015495 Myb transcription factor	AT3G49690	91.2	8e-82	AtMYB84	myb domain protein 68;myb domain protein 84;myb domain protein 36	Myb_DNA-binding Myb-like DNA-binding domain; Myb_DNA-bind_6 Myb-like DNA-binding domain
	Down		Cla019475	Chr3:5597680_5600578(-)	0.102046	35.5183	-8.4432	9.22e-05	0.010233	NAC domain protein IPR003441 (AHRD V1 ***- B9HYM0_POPTR); contains Interpro domain(s) IPR003441 No apical meristem (NAM) protein	AT1G61110	48.57	2e-91	AtNAC025	NAC domain containing protein 25;NAC domain containing protein 2;NAC-like%2C activated by AP3/PI	NAM No apical meristem (NAM) protein
	Up		Cla016990	Chr10:21307912_21309583(+)	98.3199	20.3875	2.2698	0.00513039	0.0291706	NAC domain protein (AHRD V1 ***- C0KLH1_PONTR); contains Interpro domain(s) IPR003441 No apical meristem (NAM) protein	AT5G07680	61.68	8e-86	AtNAC080	NAC domain containing protein 80;NAC domain containing protein 80;NAC domain containing protein 6	NAM No apical meristem (NAM) protein
	Down		Cla003039	Chr1:15383814_15384842(+)	1.25773	111.464	-6.46962	7.71e-05	0.00997891	NAC domain protein IPR003441 (AHRD V1 ***- B9HPW4_POPTR); contains Interpro domain(s) IPR003441 No apical meristem (NAM) protein	AT5G22380	55.22	1e-80	AtNAC090	NAC domain containing protein 90;NAC domain containing protein 61;NAC domain containing protein 61	NAM No apical meristem (NAM) protein
	Down		Cla011760	Chr7:10715001_10716327(+)	2.91461	14.8126	-2.34545	0.00216385	0.0213067	NAC domain protein IPR003441 (AHRD V1 ***- B9HZY6_POPTR); contains Interpro domain(s) IPR003441 No apical meristem (NAM) protein	AT3G15510	51.47	8e-109	AtNAC2	NAC domain containing protein 2;NAC domain containing protein 25;NAC (No Apical Meristem) domain transcriptional regulator superfamily protein	NAM No apical meristem (NAM) protein
	Down		Cla005159	Chr3:28547465_28549194(+)	3.1479	7.97455	-1.34102	0.0120044	0.0432596	Nicotianamine synthase (AHRD V1 **** B9A9Z1_LOTJA); contains Interpro domain(s) IPR004298 Nicotianamine synthase	AT1G56430	58.5	9e-122	AtNAS4	nicotianamine synthase 4;nicotianamine synthase 3;nicotianamine synthase 2	NAS Nicotianamine synthase protein
	Up		Cla019969	Chr2:25306735_25308391(-)	5.27758	2.12745	1.31075	0.001642	0.0192692	Nicotianamine synthase (AHRD V1 **** A3DUI9_MALXI); contains Interpro domain(s) IPR004298 Nicotianamine synthase	AT1G56430	56.44	6e-124	AtNAS4	nicotianamine synthase 4;nicotianamine synthase 3;nicotianamine synthase 2	NAS Nicotianamine synthase protein
	Up		Cla005404	Chr7:27744190_27745926(+)	13.1954	3.84837	1.77772	0.000901705	0.0162687	9-cis-epoxycarotenoid dioxygenase 1 (AHRD V1 ***- Q5SGD1_VITVI); contains Interpro domain(s) IPR004294 Carotenoid oxygenase	AT3G14440	75.71	0	AtNCED3	nine-cis-epoxycarotenoid dioxygenase 3;nine-cis-epoxycarotenoid dioxygenase 9;nine-cis-epoxycarotenoid dioxygenase 5	RPE65 Retinal pigment epithelial membrane protein
	Up		Cla002942	Chr6:9157470_9159170(+)	2.95679	0.44662	2.72691	0.00284601	0.0235943	9-cis-epoxycarotenoid dioxygenase (AHRD V1 ***- D5L702_CAMSA); contains Interpro domain(s) IPR004294 Carotenoid oxygenase	AT3G24220	61.8	0	AtNCED6	nine-cis-epoxycarotenoid dioxygenase 6;nine-cis-epoxycarotenoid dioxygenase 9;nine-cis-epoxycarotenoid dioxygenase 2	RPE65 Retinal pigment epithelial membrane protein
	Down	Down	Cla019456	Chr3:5422877_5427944(-)	10.3182	27.4459	-1.4114	0.0103769	0.0401736	NADH dehydrogenase (AHRD V1 ***- E5GBQ4_CUCME); contains Interpro domain(s) IPR013027 FAD-dependent pyridine nucleotide-disulphide oxidoreductase	AT4G21490	75.04	0	AtNDB3	NAD(P)H dehydrogenase B3;NAD(P)H dehydrogenase B3;NAD(P)H dehydrogenase B2	Pyr_redox_2 Pyridine nucleotide-disulphide oxidoreductase; Pyr_redox Pyridine nucleotide-disulphide oxidoreductase; EF-hand_1 EF hand
	Down		Cla019409	Chr3:4963319_4963891(+)	1.9271	14.3713	-2.89869	0.00564455	0.0302744	Non-race specific disease resistance 1 (AHRD V1 **-- D7KZT9_ARALL); contains Interpro domain(s) IPR010847 Harpin-induced 1	AT3G20600	27.12	8e-11	AtNDR1	Late embryogenesis abundant (LEA) hydroxyproline-rich glycoprotein family;Late embryogenesis abundant (LEA) hydroxyproline-rich glycoprotein family;Late embryogenesis abundant (LEA) hydroxyproline-rich glycoprotein family	No hits detected that satisfy reporting thresholds
	Up		Cla015244	Chr9:3229162_3231068(-)	23.2838	10.5033	1.14849	0.000503192	0.0138841	Nuclear transcription factor Y subunit A-1 (AHRD V1 *-** B6TAR1_MAIZE); contains Interpro domain(s) IPR001289 CCAAT-binding transcription factor, subunit B	AT3G20910	40.91	3e-39	AtNF-YA9	nuclear factor Y%2C subunit A9;nuclear factor Y%2C subunit A1;nuclear factor Y%2C subunit A1	CBFB_NFYA CCAAT-binding transcription factor (CBF-B/NF-YA) subunit B
	Up		Cla004974	Chr1:1025939_1027009(+)	12.7602	5.73878	1.15284	0.0038334	0.0262716	Auxin response factor 12 (AHRD V1 *-*- C0PL36_MAIZE); contains Interpro domain(s) IPR003340 Transcriptional factor B3	AT2G46870	81.6	4e-63	AtNGA1	AP2/B3-like transcriptional factor family protein;AP2/B3-like transcriptional factor family protein;AP2/B3-like transcriptional factor family protein	B3 B3 DNA binding domain
	Down		Cla006734	Chr6:3870196_3871050(-)	1.92725	4.48883	-1.21979	0.00441505	0.0276187	Auxin response factor 10 (AHRD V1 *-*- E2FHH6_SOLLC); contains Interpro domain(s) IPR003340 Transcriptional factor B3	AT3G61970	53.01	4e-68	AtNGA2	AP2/B3-like transcriptional factor family protein;AP2/B3-like transcriptional factor family protein;AP2/B3-like transcriptional factor family protein	B3 B3 DNA binding domain
	Up		Cla011071	Chr3:24864575_24865339(+)	4.55021	2.03464	1.16116	0.00132313	0.0182864	Harpin-induced protein-like (Fragment) (AHRD V1 **-- D2CFH8_COFAR); contains Interpro domain(s) IPR010847 Harpin-induced 1	AT2G27080	49.62	1e-88	AtNHL13	Late embryogenesis abundant (LEA) hydroxyproline-rich glycoprotein family;Late embryogenesis abundant (LEA) hydroxyproline-rich glycoprotein family;Late embryogenesis abundant (LEA) hydroxyproline-rich glycoprotein family	LEA_2 Late embryogenesis abundant protein
	Down		Cla008622	Chr2:32467021_32467656(-)	0.969064	7.34854	-2.92279	0.00407655	0.0267535	NHL1 (Fragment) (AHRD V1 **-- B0LZI2_ARATH); contains Interpro domain(s) IPR010847 Harpin-induced 1	AT3G44220	54.11	5e-81	AtNHL17	Late embryogenesis abundant (LEA) hydroxyproline-rich glycoprotein family;NDR1/HIN1-like 1;Late embryogenesis abundant (LEA) hydroxyproline-rich glycoprotein family	LEA_2 Late embryogenesis abundant protein
	Down		Cla011041	Chr1:16528528_16529828(-)	0.64247	9.48427	-3.88384	0.00200492	0.0208011	NHL1 (Fragment) (AHRD V1 **-- B0LZM3_ARATH); contains Interpro domain(s) IPR010847 Harpin-induced 1	AT3G44220	53.99	3e-81	AtNHL17	Late embryogenesis abundant (LEA) hydroxyproline-rich glycoprotein family;NDR1/HIN1-like 1;Late embryogenesis abundant (LEA) hydroxyproline-rich glycoprotein family	LEA_2 Late embryogenesis abundant protein
	Down		Cla004004	Chr7:3579362_3580567(-)	1.1587	47.4144	-5.35475	0.000782966	0.015599	Late embryogenesis abundant hydroxyproline-rich glycoprotein (AHRD V1 **-- Q9SLI0_ARATH); contains Interpro domain(s) IPR010847 Harpin-induced 1	AT5G36970	51.02	1e-72	AtNHL25	NDR1/HIN1-like 25;Late embryogenesis abundant (LEA) hydroxyproline-rich glycoprotein family;Late embryogenesis abundant (LEA) hydroxyproline-rich glycoprotein family	LEA_2 Late embryogenesis abundant protein
	Down		Cla020339	Chr5:30711746_30714834(+)	4.97754	26.2937	-2.40121	9.97e-06	0.00718174	Receptor-like kinase (AHRD V1 **** A7VM45_MARPO); contains Interpro domain(s) IPR002290 Serine/threonine protein kinase	AT5G16000	75.64	0	AtNIK1	NSP-interacting kinase 1;NSP-interacting kinase 2;NSP-interacting kinase 2	Pkinase Protein kinase domain; Pkinase_Tyr Protein tyrosine kinase; LRRNT_2 Leucine rich repeat N-terminal domain; LRR_4 Leucine Rich repeats (2 copies); LRR_8 Leucine rich repeat
	Down		Cla021658	Chr5:5034444_5036166(-)	2.46115	119.465	-5.60111	0.0104476	0.0403157	Aquaporin (AHRD V1 ***- E5GC22_CUCME); contains Interpro domain(s) IPR000425 Major intrinsic protein	AT3G06100	52.25	7e-70	AtNIP7;1	NOD26-like intrinsic protein 7%3B1;NOD26-like intrinsic protein 7%3B1;NOD26-like intrinsic protein 4%3B2	MIP Major intrinsic protein
	Up		Cla015062	Chr9:4613209_4615915(+)	12.7344	4.77489	1.41519	0.00357045	0.0255719	Tripartite motif-containing 22 (Predicted) (AHRD V1 *--- B0VXD4_CALJA); contains Interpro domain(s) IPR004331 SPX, N-terminal	AT1G02860	63.24	8e-152	AtNLA	SPX (SYG1/Pho81/XPR1) domain-containing protein;SPX (SYG1/Pho81/XPR1) domain-containing protein;SPX (SYG1/Pho81/XPR1) domain-containing protein	zf-RING_UBOX RING-type zinc-finger; zf-C3HC4 Zinc finger, C3HC4 type (RING finger); zf-C3HC4_3 Zinc finger, C3HC4 type (RING finger)
	Down		Cla011838	Chr7:9161423_9166257(+)	0.571462	3.34209	-2.54802	0.0122761	0.0438087	Peptide transporter (AHRD V1 ***- A6YJX4_9MAGN); contains Interpro domain(s) IPR000109 TGF-beta receptor, type I/II extracellular region	AT1G59740	75.54	0	AtNPF4.3	Major facilitator superfamily protein;Major facilitator superfamily protein;peptide transporter 1	PTR2 POT family
	Down	Down	Cla005955	Chr7:1666107_1668546(+)	0.309703	21.1954	-6.09672	0.000496059	0.0138734	Peptide transporter (AHRD V1 **-- A6YJX4_9MAGN); contains Interpro domain(s) IPR000109 TGF-beta receptor, type I/II extracellular region	AT5G46050	60.07	0	AtNPF5.2	peptide transporter 3;Major facilitator superfamily protein;Major facilitator superfamily protein	PTR2 POT family
	Up		Cla012250	Chr6:19655288_19659396(+)	137.815	46.2026	1.57669	0.00541798	0.0298696	Nitrate transporter (AHRD V1 ***- D7LE97_ARALL); contains Interpro domain(s) IPR000109 TGF-beta receptor, type I/II extracellular region	AT2G26690	76.69	0	AtNPF6.2	Major facilitator superfamily protein;Major facilitator superfamily protein;Major facilitator superfamily protein	PTR2 POT family
	Up		Cla007427	Chr5:23063492_23068896(-)	46.9006	21.8065	1.10485	0.00383029	0.0262716	Nucleoredoxin (Fragment) (AHRD V1 **-- B4ZFY3_AMPCA); contains Interpro domain(s) IPR012335 Thioredoxin fold	AT1G60420	41.81	3e-78	AtNRX1	DC1 domain-containing protein;protein kinase C-like zinc finger protein;protein kinase C-like zinc finger protein	Thioredoxin_8 Thioredoxin-like; AhpC-TSA AhpC/TSA family; Thioredoxin Thioredoxin; C1_2 C1 domain; Thioredoxin_2 Thioredoxin-like domain
	Down		Cla009627	Chr1:31658215_31659085(+)	3.59169	9.60411	-1.41899	0.00268878	0.0231108	Dof zinc finger protein (AHRD V1 *-*- Q0PY33_SOLLC); contains Interpro domain(s) IPR003851 Zinc finger, Dof-type	AT5G60850	53.1	2e-31	AtOBP4	OBF binding protein 4;TARGET OF MONOPTEROS 6;Dof-type zinc finger DNA-binding family protein	zf-Dof Dof domain, zinc finger
	Down		Cla007378	Chr5:22086688_22088535(+)	0.375326	35.953	-6.58183	0.000948431	0.0163772	Solute carrier family 22 member 4 (Predicted) (AHRD V1 ***- B1MTP7_CALMO); contains Interpro domain(s) IPR016196 Major facilitator superfamily, general substrate transporter	AT3G20660	59.81	0	AtOCT4	organic cation/carnitine transporter4;organic cation/carnitine transporter1;organic cation/carnitine transporter 2	Sugar_tr Sugar (and other) transporter; MFS_1 Major Facilitator Superfamily
	Down		Cla020482	Chr5:29507669_29508457(+)	11.517	37.8237	-1.71553	0.000920079	0.0162987	Plant-specific domain TIGR01568 family protein (AHRD V1 **-- B6U9N9_MAIZE); contains Interpro domain(s) IPR006458 Protein of unknown function DUF623, plant	AT5G04820	42.8	2e-43	AtOFP13	ovate family protein 13;ovate family protein 15;ovate family protein 18	Ovate Transcriptional repressor, ovate
	Down		Cla010638	Chr6:12016148_12016942(-)	2.40667	10.9402	-2.18453	0.000785006	0.015599	Plant-specific domain TIGR01568 family protein (AHRD V1 *--- B6SHS0_MAIZE); contains Interpro domain(s) IPR006458 Protein of unknown function DUF623, plant	AT5G19650	36.84	3e-36	AtOFP8	ovate family protein 8;ovate family protein 7;ovate family protein 6	Ovate Transcriptional repressor, ovate
	Down		Cla003617	Chr1:5436569_5436961(-)	13.7314	305.594	-4.47606	0.0124257	0.0441179	Oleosin-like protein (AHRD V1 ***- Q39629_CITSI); contains Interpro domain(s) IPR000136 Oleosin	AT5G51210	48.85	7e-33	AtOLEO3	oleosin3;oleosin 1;Oleosin family protein	Oleosin Oleosin
	Down		Cla004454	Chr10:4552170_4554836(+)	2.6064	12.7016	-2.28488	0.0066947	0.0327614	O-methyltransferase-like protein (AHRD V1 **** D3JZ18_PRUMU); contains Interpro domain(s) IPR016461 O-methyltransferase, COMT, eukaryota	AT5G54160	52.29	1e-139	AtOMT1	O-methyltransferase 1;O-methyltransferase family protein;O-methyltransferase family protein	Methyltransf_2 O-methyltransferase domain; Dimerisation Dimerisation domain
	Up		Cla007400	Chr5:22708905_22711556(+)	23.741	11.5593	1.03833	0.00530194	0.029611	4-coumarate--CoA ligase-like 3 (AHRD V1 ***- F4HST6_ARATH); contains Interpro domain(s) IPR000873 AMP-dependent synthetase and ligase	AT1G20510	72.71	0	AtOPCL1	OPC-8:0 CoA ligase1;OPC-8:0 CoA ligase1;OPC-8:0 CoA ligase1	AMP-binding AMP-binding enzyme
	Up		Cla008760	Chr10:56995_60381(-)	25.8206	12.634	1.03121	0.00104186	0.0170005	Serine/threonine protein kinase (AHRD V1 **** F5C0G2_SOLCH); contains Interpro domain(s) IPR015740 Plant protein serine/threonine kinase-like	AT4G33950	75.24	0	AtOST1	Protein kinase superfamily protein;Protein kinase superfamily protein;sucrose nonfermenting 1(SNF1)-related protein kinase 2.3	Pkinase Protein kinase domain; Pkinase_Tyr Protein tyrosine kinase
	Down		Cla010267	Chr9:29610546_29615912(+)	1.55366	14.3528	-3.20759	0.00238944	0.0221558	Serine/threonine-protein kinase (AHRD V1 **** F6M7D4_ORYSJ); contains Interpro domain(s) IPR015740 Plant protein serine/threonine kinase-like	AT4G33950	69.66	4e-165	AtOST1	Protein kinase superfamily protein;Protein kinase superfamily protein;sucrose nonfermenting 1(SNF1)-related protein kinase 2.3	Pkinase Protein kinase domain; Pkinase_Tyr Protein tyrosine kinase
	Up		Cla012646	Chr7:24883036_24883711(+)	38.3451	12.2202	1.64977	0.00562085	0.0302384	Os05g0524100 protein (Fragment) (AHRD V1 *--- Q0DGM2_ORYSJ)	AT5G56550	50	3e-18	AtOXS3	oxidative stress 3;hypothetical protein;hypothetical protein	No hits detected that satisfy reporting thresholds
	Up		Cla016817	Chr11:25162259_25162993(+)	224.99	111.194	1.01678	0.000784204	0.015599	Zinc finger CCCH domain-containing protein 49 (AHRD V1 ***- C3H49_ARATH)	AT4G29190	51.23	8e-62	AtOZF2	Zinc finger C-x8-C-x5-C-x3-H type family protein;CCCH-type zinc finger family protein;Zinc finger C-x8-C-x5-C-x3-H type family protein	No hits detected that satisfy reporting thresholds
	Up		Cla022659	Chr8:25493715_25494635(+)	70.8665	9.19157	2.94672	0.000464426	0.0138562	Zinc finger CCCH domain-containing protein 37 (AHRD V1 *-** E9CEA3_CAPO3); contains Interpro domain(s) IPR000571 Zinc finger, CCCH-type	AT4G29190	44.48	7e-81	AtOZF2	Zinc finger C-x8-C-x5-C-x3-H type family protein;CCCH-type zinc finger family protein;Zinc finger C-x8-C-x5-C-x3-H type family protein	No hits detected that satisfy reporting thresholds
	Up	Down	Cla013805	Chr8:16397639_16399792(+)	14.7401	5.87117	1.32803	5.68e-05	0.00976752	Prostaglandin E synthase 3 (AHRD V1 **-- B4FLE3_MAIZE); contains Interpro domain(s) IPR017447 CS	AT3G03773	49.17	7e-37	AtP23-2	HSP20-like chaperones superfamily protein;HSP20-like chaperones superfamily protein;HSP20-like chaperones superfamily protein	CS CS domain
	Down		Cla013799	Chr8:16466590_16469666(+)	12.459	26.0822	-1.06588	0.0084342	0.0365692	Polyadenylate-binding protein 2 (AHRD V1 **** B6U4M0_MAIZE); contains Interpro domain(s) IPR006515 Polyadenylate binding protein, human types 1, 2, 3, 4	AT1G22760	59.78	0	AtPAB3	poly(A) binding protein 3;poly(A)-binding protein 5;poly(A)-binding protein 5	RRM_1 RNA recognition motif. (a.k.a. RRM, RBD, or RNP domain); PABP Poly-adenylate binding protein, unique domain; RRM_5 RNA recognition motif. (a.k.a. RRM, RBD, or RNP domain); RRM_occluded Occluded RNA-recognition motif
	Down	Down	Cla018300	Chr4:20630343_20632484(-)	10.7852	21.7549	-1.01228	0.00386935	0.0263656	Phenylalanine ammonia-lyase (AHRD V1 ***- Q1AJZ8_TRIPR); contains Interpro domain(s) IPR005922 Phenylalanine ammonia-lyase	AT3G53260	84.1	0	AtPAL2	phenylalanine ammonia-lyase 2;PHE ammonia lyase 1;phenylalanine ammonia-lyase 4	Lyase_aromatic Aromatic amino acid lyase
	Down	Down	Cla014963	Chr9:8054257_8057163(+)	8.21586	24.2474	-1.56135	0.000608638	0.0146399	3-methyl-2-oxobutanoate hydroxymethyltransferase (AHRD V1 ***- B6TL59_MAIZE); contains Interpro domain(s) IPR003700 Ketopantoate hydroxymethyltransferase	AT3G61530	68.42	6e-158	AtPANB2	Phosphoenolpyruvate carboxylase family protein;Phosphoenolpyruvate carboxylase family protein;ketopantoate hydroxymethyltransferase 1	Pantoate_transf Ketopantoate hydroxymethyltransferase
	Down	Down	Cla018153	Chr4:19210495_19217077(+)	22.9901	52.4653	-1.19035	8.76e-05	0.0100826	Peptidyl-prolyl cis-trans isomerase D (AHRD V1 *--- PPID_BOVIN); contains Interpro domain(s) IPR001179 Peptidyl-prolyl cis-trans isomerase, FKBP-type	AT3G54010	66.92	0	AtPAS1	FKBP-type peptidyl-prolyl cis-trans isomerase family protein;FKBP-type peptidyl-prolyl cis-trans isomerase family protein;FKBP-type peptidyl-prolyl cis-trans isomerase family protein	FKBP_C FKBP-type peptidyl-prolyl cis-trans isomerase; TPR_1 Tetratricopeptide repeat; TPR_2 Tetratricopeptide repeat; TPR_8 Tetratricopeptide repeat; TPR_11 TPR repeat; TPR_16 Tetratricopeptide repeat; TPR_12 Tetratricopeptide repeat; TPR_6 Tetratricopeptide repeat
	Down		Cla005976	Chr7:1891387_1894306(+)	0.484697	19.7691	-5.35002	1.25e-05	0.00718174	Phosphatidylinositol transfer protein SFH5 (AHRD V1 *--- SFH5_YARLI); contains Interpro domain(s) IPR001251 Cellular retinaldehyde-binding/triple function, C-terminal	AT1G30690	48.84	2e-106	AtPATL4	Sec14p-like phosphatidylinositol transfer family protein;Sec14p-like phosphatidylinositol transfer family protein;SEC14 cytosolic factor family protein / phosphoglyceride transfer family protein	CRAL_TRIO CRAL/TRIO domain
	Down		Cla012841	Chr7:27228056_27233676(+)	18.3226	82.8299	-2.17652	0.00022429	0.012665	ATP binding / kinase/ protein kinase/ protein serine/threonine kinase/ protein-tyrosine kinase (AHRD V1 **** C5DB54_VITVI); contains Interpro domain(s) IPR002290 Serine/threonine protein kinase	AT1G61590	71.43	0	AtPBL15	Protein kinase superfamily protein;Protein kinase superfamily protein;Protein kinase superfamily protein	Pkinase_Tyr Protein tyrosine kinase; Pkinase Protein kinase domain
	Down		Cla022955	Chr11:15914388_15915834(-)	0.746403	25.0402	-5.06815	9.67e-05	0.0103379	Kinase family protein (AHRD V1 ***- D7LYI7_ARALL); contains Interpro domain(s) IPR011009 Protein kinase-like	AT5G56460	30.43	9e-10	AtPBL16	Protein kinase superfamily protein;Protein kinase superfamily protein;Protein kinase family protein	No hits detected that satisfy reporting thresholds
	Down		Cla001554	Chr3:20772577_20778277(-)	2.92182	5.99531	-1.03697	0.00540116	0.0298654	Receptor protein kinase-like protein (AHRD V1 **** Q9LRY1_ARATH); contains Interpro domain(s) IPR002290 Serine/threonine protein kinase	AT3G07070	58.27	4e-168	AtPBL26	Protein kinase superfamily protein;Protein kinase superfamily protein;Protein kinase superfamily protein	Pkinase Protein kinase domain; Pkinase_Tyr Protein tyrosine kinase
	Down		Cla021930	Chr8:18683642_18685680(+)	1.27996	4.91267	-1.94041	0.00172637	0.0196233	Receptor-like protein kinase At3g21340 (AHRD V1 **** RLK6_ARATH); contains Interpro domain(s) IPR002290 Serine/threonine protein kinase	AT1G76360	56.98	9e-131	AtPBL31	Protein kinase superfamily protein;Protein kinase superfamily protein;Protein kinase superfamily protein	Pkinase_Tyr Protein tyrosine kinase; Pkinase Protein kinase domain
	Down	Down	Cla022485	Chr8:24055390_24058036(+)	6.57825	18.53	-1.49408	0.000972811	0.0165911	Isoflavone reductase-like protein 5 (AHRD V1 ***- Q3KN68_VITVI); contains Interpro domain(s) IPR008030 NmrA-like	AT4G39230	72.54	1e-98	AtPCBER1	NmrA-like negative transcriptional regulator family protein;NmrA-like negative transcriptional regulator family protein;NAD(P)-binding Rossmann-fold superfamily protein	NmrA NmrA-like family
	Up		Cla017909	Chr10:27180851_27182200(-)	11.7892	5.56507	1.083	0.00821279	0.036138	Aspartic proteinase nepenthesin-1 (AHRD V1 **-- E5GC71_CUCME); contains Interpro domain(s) IPR001461 Peptidase A1	AT5G02190	68.37	0	AtPCS1	Eukaryotic aspartyl protease family protein;Eukaryotic aspartyl protease family protein;Eukaryotic aspartyl protease family protein	TAXi_N Xylanase inhibitor N-terminal; TAXi_C Xylanase inhibitor C-terminal; Asp Eukaryotic aspartyl protease
	Down		Cla016474	Chr11:21720230_21723056(-)	6.69848	14.8362	-1.14721	0.000582363	0.0144374	Proline dehydrogenase (AHRD V1 ***- Q6RUF9_SOYBN); contains Interpro domain(s) IPR015659 Proline oxidase	AT5G38710	57.48	0	AtPDH2	Methylenetetrahydrofolate reductase family protein;Methylenetetrahydrofolate reductase family protein;Methylenetetrahydrofolate reductase family protein	Pro_dh Proline dehydrogenase
	Down	Down	Cla013928	Chr8:14843375_14847246(-)	186.44	437.001	-1.22892	0.000623344	0.0147786	Protein disulfide isomerase (AHRD V1 **** B1Q2X4_SOYBN); contains Interpro domain(s) IPR005792 Protein disulphide isomerase	AT1G21750	63.73	0	AtPDIL1-1	PDI-like 1-1;PDI-like 1-2;PDI-like 1-1	Thioredoxin Thioredoxin; Thioredoxin_6 Thioredoxin-like domain; Thioredoxin_2 Thioredoxin-like domain; OST3_OST6 OST3 / OST6 family, transporter family; Thioredoxin_7 Thioredoxin-like; Thioredoxin_8 Thioredoxin-like; AhpC-TSA AhpC/TSA family; ERp29_N ERp29, N-terminal domain
	Down		Cla015592	Chr9:183552_184644(+)	4.08932	14.3477	-1.81089	0.000737267	0.0155109	Phosphatase (AHRD V1 **-* D2V497_NAEGR); contains Interpro domain(s) IPR016965 Pyridoxal phosphate phosphatase, PHOSPHO2	AT1G17710	64.86	3e-119	AtPEPC1	Pyridoxal phosphate phosphatase-related protein;inorganic pyrophosphatase 1;Pyridoxal phosphate phosphatase-related protein	Put_Phosphatase Putative Phosphatase; HAD haloacid dehalogenase-like hydrolase
	Up		Cla015595	Chr9:176434_177507(+)	36.2691	17.1334	1.08193	0.00498454	0.0288202	Phosphatase (AHRD V1 **-* D2V497_NAEGR); contains Interpro domain(s) IPR016965 Pyridoxal phosphate phosphatase, PHOSPHO2	AT1G17710	68.6	1e-134	AtPEPC1	Pyridoxal phosphate phosphatase-related protein;inorganic pyrophosphatase 1;Pyridoxal phosphate phosphatase-related protein	Put_Phosphatase Putative Phosphatase; HAD haloacid dehalogenase-like hydrolase
	Down	Down	Cla022405	Chr8:23345275_23346550(-)	0.374562	7.24288	-4.27329	0.00122465	0.0179181	Peroxidase (AHRD V1 ***- B9GQQ9_POPTR); contains Interpro domain(s) IPR002016 Haem peroxidase, plant/fungal/bacterial	AT5G42180	71.25	3e-168	AtPER64	Peroxidase superfamily protein;Peroxidase superfamily protein;Peroxidase superfamily protein	peroxidase Peroxidase
	Up		Cla013515	Chr2:28521893_28524133(-)	11.2142	5.26766	1.09009	0.00131832	0.0182864	Protein tyrosine phosphatase (AHRD V1 ***- E9CIF9_CAPO3); contains Interpro domain(s) IPR004861 Protein-tyrosine phosphatase, SIW14-like	AT1G05000	83.93	2e-103	AtPFA-DSP1	Phosphotyrosine protein phosphatases superfamily protein;Phosphotyrosine protein phosphatases superfamily protein;Phosphotyrosine protein phosphatases superfamily protein	Y_phosphatase2 Tyrosine phosphatase family; Y_phosphatase3 Tyrosine phosphatase family
	Down	Down	Cla009559	Chr3:16054552_16056257(-)	3.40733	7.09921	-1.05902	0.00387238	0.0263666	Protein tyrosine phosphatase (AHRD V1 ***- E9CIF9_CAPO3); contains Interpro domain(s) IPR004861 Protein-tyrosine phosphatase, SIW14-like	AT3G02800	64.79	8e-95	AtPFA-DSP3	Tyrosine phosphatase family protein;Phosphotyrosine protein phosphatases superfamily protein;Phosphotyrosine protein phosphatases superfamily protein	Y_phosphatase2 Tyrosine phosphatase family
	Down		Cla016456	Chr11:21565769_21570615(+)	0.45214	3.024	-2.74162	0.000914726	0.0162987	6-phosphofructokinase 2 (AHRD V1 **** B6SWS5_MAIZE); contains Interpro domain(s) IPR012004 Pyrophosphate-dependent phosphofructokinase TP0108	AT4G26270	68.04	0	AtPFK3	phosphofructokinase 3;phosphofructokinase 7;phosphofructokinase 1	PFK Phosphofructokinase
	Down		Cla000831	Chr4:985573_986553(+)	84.8354	191.19	-1.17227	0.00414417	0.0269495	Polygalacturonase-inhibitor protein (AHRD V1 ***- Q8W3U5_9ROSI); contains Interpro domain(s) IPR013210 Leucine-rich repeat, N-terminal	AT5G06860	62.78	1e-133	AtPGIP1	polygalacturonase inhibiting protein 1;polygalacturonase inhibiting protein 2;Leucine-rich repeat (LRR) family protein	LRR_8 Leucine rich repeat; LRR_1 Leucine Rich Repeat; LRRNT_2 Leucine rich repeat N-terminal domain; LRR_4 Leucine Rich repeats (2 copies); LRR_6 Leucine Rich repeat
	Down		Cla008444	Chr1:9259112_9261285(+)	1.4301	4.94141	-1.7888	0.000789054	0.0156391	Glycogenin-like protein (AHRD V1 ***- Q5NA53_ORYSJ); contains Interpro domain(s) IPR002495 Glycosyl transferase, family 8	AT3G18660	67.47	0	AtPGSIP1	plant glycogenin-like starch initiation protein 1;plant glycogenin-like starch initiation protein 1;plant glycogenin-like starch initiation protein 1	Glyco_transf_8 Glycosyl transferase family 8
	Up		Cla005641	Chr10:2909825_2910097(-)	9.08613	3.06895	1.56592	0.00117695	0.0177082	Nucleotide-diphospho-sugar transferase domain-containing protein (AHRD V1 **-- Q8VZP6_ARATH)	AT2G35710	78.33	1e-28	AtPGSIP7	Nucleotide-diphospho-sugar transferases superfamily protein	No hits detected that satisfy reporting thresholds
	Up		Cla005640	Chr10:2900565_2903526(-)	4.7379	1.75152	1.43564	0.00567245	0.0303112	Glycogenin-1 (Fragment) (AHRD V1 *--- F1KWJ7_ASCSU)	AT4G16600	64.48	2e-156	AtPGSIP8	Nucleotide-diphospho-sugar transferases superfamily protein;Nucleotide-diphospho-sugar transferases superfamily protein;Nucleotide-diphospho-sugar transferases superfamily protein	No hits detected that satisfy reporting thresholds
	Down		Cla017962	Chr10:27525928_27529338(-)	4.27375	15.0295	-1.81422	0.00213288	0.0212153	Vesicular glutamate transporter 2 (AHRD V1 **-- F1K153_CHICK); contains Interpro domain(s) IPR016196 Major facilitator superfamily, general substrate transporter	AT2G38060	67.93	0	AtPHT4;2	phosphate transporter 4%3B2;phosphate transporter 4%3B2;phosphate transporter 4%3B3	MFS_1 Major Facilitator Superfamily; Sugar_tr Sugar (and other) transporter
	Down		Cla017789	Chr10:26155566_26157311(-)	4.58781	9.33045	-1.02414	0.00549839	0.0300231	Nodulin-like protein (Fragment) (AHRD V1 *-*- O81121_ARATH); contains Interpro domain(s) IPR010658 Nodulin-like	AT2G39210	62.94	0	AtPIC30	Major facilitator superfamily protein;Major facilitator superfamily protein;Nodulin-like / Major Facilitator Superfamily protein	Nodulin-like Nodulin-like; MFS_1 Major Facilitator Superfamily
	Down		Cla003061	Chr4:14558213_14561680(-)	0.242024	7.07051	-4.86859	0.00199758	0.0208011	Phosphatidylinositol-4-phosphate 5-kinase family protein (AHRD V1 **** D7LGK2_ARALL); contains Interpro domain(s) IPR017163 Phosphatidylinositol-4-phosphate 5-kinase, plant	AT3G56960	72.85	0	AtPIP5K4	phosphatidyl inositol monophosphate 5 kinase 4;phosphatidyl inositol monophosphate 5 kinase 4;phosphatidylinositol- 4-phosphate 5-kinase 5	PIP5K Phosphatidylinositol-4-phosphate 5-Kinase; MORN MORN repeat
	Up		Cla017479	Chr10:22958941_22960605(-)	7.7347	3.1802	1.28223	0.0142395	0.0472876	Protein PHYTOCHROME KINASE SUBSTRATE 4 (AHRD V1 *-*- PKS4_ARATH)	AT5G04190	32.97	2e-25	AtPKS4	phytochrome kinase substrate 4;phytochrome kinase substrate 2	No hits detected that satisfy reporting thresholds
	Down	Down	Cla021099	Chr5:425258_426546(+)	53.8579	2985.6	-5.79272	0.0133714	0.0457664	Chalcone synthase 3 protein (AHRD V1 ***- D5LQ17_BRARA); contains Interpro domain(s) IPR001099 Chalcone/stilbene synthase, N-terminal	AT1G02050	76.34	0	AtPKSA/AtLAP6	Chalcone and stilbene synthase family protein;Chalcone and stilbene synthase family protein;Chalcone and stilbene synthase family protein	Chal_sti_synt_N Chalcone and stilbene synthases, N-terminal domain; Chal_sti_synt_C Chalcone and stilbene synthases, C-terminal domain; ACP_syn_III 3-Oxoacyl-[acyl-carrier-protein (ACP)] synthase III
	Down		Cla018886	Chr6:23150515_23153459(-)	24.0781	50.7688	-1.07622	0.000683146	0.0152007	Phospholipase A2 (AHRD V1 ***- Q5CCT8_TOBAC); contains Interpro domain(s) IPR016090 Phospholipase A2	AT2G06925	70.75	3e-74	AtPLA2-ALPHA	Phospholipase A2 family protein;Phospholipase A2 family protein;Phospholipase A2 family protein	No hits detected that satisfy reporting thresholds
	Down		Cla004959	Chr1:829911_831133(+)	3.28057	9.55787	-1.54274	0.00844476	0.0365692	Dehydration stress-induced protein (AHRD V1 **-- Q9AXN5_BRANA); contains Interpro domain(s) IPR001024 Lipoxygenase, LH2	AT2G22170	49.68	2e-49	AtPLAT2	Lipase/lipooxygenase%2C PLAT/LH2 family protein;Lipase/lipooxygenase%2C PLAT/LH2 family protein;Lipase/lipooxygenase%2C PLAT/LH2 family protein	PLAT PLAT/LH2 domain; ATS3 Embryo-specific protein 3, (ATS3)
	Up		Cla008817	Chr10:835461_836644(+)	70.9334	25.4384	1.47946	0.00248101	0.02238	PLATZ transcription factor (Fragment) (AHRD V1 **-- F1DJR5_MAIZE); contains Interpro domain(s) IPR006734 Protein of unknown function DUF597	AT4G17900	69.41	5e-104	AtPLATZ11	PLATZ transcription factor family protein;PLATZ transcription factor family protein;PLATZ transcription factor family protein	PLATZ PLATZ transcription factor
	Up		Cla016206	Chr9:11534885_11535857(-)	92.8714	45.8795	1.01738	0.00340367	0.0249647	PLATZ transcription factor (Fragment) (AHRD V1 **-- F1DJR5_MAIZE); contains Interpro domain(s) IPR006734 Protein of unknown function DUF597	AT4G17900	72.69	2e-108	AtPLATZ11	PLATZ transcription factor family protein;PLATZ transcription factor family protein;PLATZ transcription factor family protein	PLATZ PLATZ transcription factor
	Down		Cla022725	Chr8:26023137_26023856(+)	1.96481	86.8307	-5.46575	0.000115504	0.0105099	Pectate lyase (AHRD V1 ***- Q6U7H9_MALDO); contains Interpro domain(s) IPR002022 Pectate lyase/Amb allergen	AT3G27400	79.14	6e-77	AtPLL18	Pectin lyase-like superfamily protein;Pectin lyase-like superfamily protein;Pectin lyase-like superfamily protein	No hits detected that satisfy reporting thresholds
	Down	Down	Cla008264	Chr3:1719741_1722339(+)	11.5758	52.7005	-2.18671	0.000161899	0.0116885	Malonyl-coenzyme:anthocyanin 5-O-glucoside-6&apos;&apos;&apos;-O-malonyltransferase (AHRD V1 **-- 5MAT1_SALSN); contains Interpro domain(s) IPR003480 Transferase	AT3G29670	38.97	1e-100	AtPMAT2	HXXXD-type acyl-transferase family protein;HXXXD-type acyl-transferase family protein;HXXXD-type acyl-transferase family protein	Transferase Transferase family
	Down		Cla005681	Chr10:3565711_3566289(-)	0.408967	4.00403	-3.2914	0.000106597	0.0103379	Pectinesterase (AHRD V1 **** B9T3X5_RICCO); contains Interpro domain(s) IPR006501 Pectinesterase inhibitor	AT5G62360	42.39	3e-41	AtPMEI13	Plant invertase/pectin methylesterase inhibitor superfamily protein;Plant invertase/pectin methylesterase inhibitor superfamily protein;Plant invertase/pectin methylesterase inhibitor superfamily protein	PMEI Plant invertase/pectin methylesterase inhibitor
	Up		Cla004896	Chr1:233001_238457(-)	5.4584	2.49462	1.12966	0.0119565	0.0432083	Pectinesterase (AHRD V1 **** A0ZNJ9_PYRCO); contains Interpro domain(s) IPR000070 Pectinesterase, catalytic	AT5G53370	63.22	0	AtPMEPCRF	pectin methylesterase PCR fragment F;pectin methylesterase PCR fragment F;Plant invertase/pectin methylesterase inhibitor superfamily	Pectinesterase Pectinesterase; PMEI Plant invertase/pectin methylesterase inhibitor
	Up		Cla016546	Chr11:22403519_22405163(+)	38.5459	14.1214	1.44869	0.00315533	0.0241937	Membrane transporter D1 (AHRD V1 **** GTR1_LEIDO); contains Interpro domain(s) IPR003663 Sugar/inositol transporter	AT3G18830	70.1	0	AtPMT5	polyol/monosaccharide transporter 5;polyol/monosaccharide transporter 1;polyol/monosaccharide transporter 2	Sugar_tr Sugar (and other) transporter; MFS_1 Major Facilitator Superfamily
	Down		Cla021302	Chr5:2003300_2005811(+)	0.421151	2.13413	-2.34124	0.00739615	0.0342283	F-box protein PP2-B7 (AHRD V1 ***- PP2B7_ARATH); contains Interpro domain(s) IPR001810 Cyclin-like F-box	AT1G80110	36.57	2e-40	AtPP2-B11	phloem protein 2-B11;F-box family protein;phloem protein 2-B8	PP2 Phloem protein 2; F-box F-box domain; F-box-like F-box-like
	Up		Cla021683	Chr5:5251135_5257450(+)	16.9996	6.94083	1.29232	0.0070393	0.0334605	Pyruvate phosphate dikinase (AHRD V1 **** Q84N32_SORBI); contains Interpro domain(s) IPR010121 Pyruvate, phosphate dikinase	AT4G15530	76.37	0	AtPPDK	pyruvate orthophosphate dikinase;pyruvate orthophosphate dikinase;pyruvate orthophosphate dikinase	PEP-utilizers_C PEP-utilising enzyme, TIM barrel domain; PPDK_N Pyruvate phosphate dikinase, PEP/pyruvate binding domain; PEP-utilizers PEP-utilising enzyme, mobile domain
	Up		Cla020913	Chr5:25626458_25627249(+)	5.32127	2.12544	1.32401	0.00529539	0.0296015	Receptor-like kinase (AHRD V1 **** Q9LL52_ORYSA); contains Interpro domain(s) IPR002290 Serine/threonine protein kinase	AT5G38280	40.46	1e-58	AtPR5K	receptor serine/threonine kinase;PR5-like receptor kinase;PR5-like receptor kinase	Pkinase_Tyr Protein tyrosine kinase; Pkinase Protein kinase domain
	Down		Cla016804	Chr11:25025591_25027084(-)	12.2902	29.4399	-1.26026	0.0138601	0.0466965	Profilin (AHRD V1 ***- B9RKF4_RICCO); contains Interpro domain(s) IPR005455 Profilin, plant	AT2G19770	85.07	1e-82	AtPRF5	profilin 5;profilin 4;profilin 2	Profilin Profilin
	Up		Cla021548	Chr5:4025316_4025609(+)	13.3089	5.66528	1.23217	0.0129272	0.0450276	Unknown Protein (AHRD V1)	AT3G23170	43	5e-12	AtPRP	hypothetical protein;hypothetical protein;hypothetical protein	No hits detected that satisfy reporting thresholds
	Down	Down	Cla009234	Chr6:4816508_4817768(-)	146.666	384.36	-1.38993	0.0070203	0.0334316	Peroxidase 40 (AHRD V1 ***- F4JLR5_ARATH); contains Interpro domain(s) IPR002016 Haem peroxidase, plant/fungal/bacterial	AT4G16270	68.58	4e-143	AtPRX40	peroxidase superfamily protein;Peroxidase superfamily protein;Peroxidase superfamily protein	peroxidase Peroxidase
	Up		Cla003191	Chr2:33743487_33745999(+)	41.6457	20.8093	1.00094	0.00171791	0.0196114	Peroxidase (AHRD V1 ***- O65773_CUCPE); contains Interpro domain(s) IPR002016 Haem peroxidase, plant/fungal/bacterial	AT5G06720	56.21	9e-119	AtPRX53	peroxidase 2;Peroxidase superfamily protein;Peroxidase superfamily protein	peroxidase Peroxidase
	Down		Cla022642	Chr8:25285947_25286287(-)	0.603934	5.02919	-3.05786	0.00185188	0.0201382	Phytosulfokines (AHRD V1 *-*- PSK_ASPOF); contains Interpro domain(s) IPR009438 Phytosulfokine	AT4G37720	38.1	8e-10	AtPSK6	phytosulfokine 6 precursor;phytosulfokine 2 precursor;phytosulfokine 4 precursor	PSK Phytosulfokine precursor protein (PSK)
	Down		Cla004292	Chr5:9576835_9580005(-)	7.34839	16.9493	-1.20572	0.0014206	0.0184994	Receptor kinase (AHRD V1 **** B8XA57_GOSBA); contains Interpro domain(s) IPR002290 Serine/threonine protein kinase	AT5G53890	62.57	0	AtPSKR2	phytosylfokine-alpha receptor 2;phytosulfokin receptor 1;Leucine-rich receptor-like protein kinase family protein	Pkinase Protein kinase domain; Pkinase_Tyr Protein tyrosine kinase; LRR_8 Leucine rich repeat; LRR_4 Leucine Rich repeats (2 copies); LRR_1 Leucine Rich Repeat; LRRNT_2 Leucine rich repeat N-terminal domain
	Down		Cla008618	Chr2:32527041_32528270(-)	0.622929	7.91539	-3.66752	2.89e-05	0.00881891	U-box domain-containing protein (AHRD V1 ***- D7LU64_ARALL); contains Interpro domain(s) IPR003613 U box domain	AT3G52450	49.89	5e-143	AtPUB22	plant U-box 22;plant U-box 23;E3 ubiquitin-protein ligase PUB24-like protein	U-box U-box domain
	Up		Cla013079	Chr5:10646470_10647753(+)	14.1482	5.92639	1.25539	0.00641094	0.0320443	U-box domain-containing protein (AHRD V1 ***- A8IXJ0_BRACM); contains Interpro domain(s) IPR003613 U box domain	AT1G49780	64.04	0	AtPUB26	plant U-box 26;plant U-box 25;plant U-box 23	U-box U-box domain
	Down		Cla018075	Chr4:18326047_18326664(-)	1.86657	4.13906	-1.14891	0.00532551	0.0296692	Abscisic acid receptor PYR1 (AHRD V1 **-- F2YHU9_FRAAN); contains Interpro domain(s) IPR019587 Polyketide cyclase/dehydrase	AT2G38310	72.73	6e-83	AtPYL4	PYR1-like 4;Polyketide cyclase/dehydrase and lipid transport superfamily protein;PYR1-like 6	Polyketide_cyc2 Polyketide cyclase / dehydrase and lipid transport
	Down		Cla015246	Chr9:3205020_3210357(-)	0.321466	10.022	-4.96236	2.8e-05	0.00881891	Polygalacturonase (AHRD V1 ***- O81246_CUCME); contains Interpro domain(s) IPR000743 Glycoside hydrolase, family 28	AT3G07970	54.71	4e-162	AtQRT2	Pectin lyase-like superfamily protein;Pectin lyase-like superfamily protein;polygalacturonase ADPG2-like protein	Glyco_hydro_28 Glycosyl hydrolases family 28
	Down	Down	Cla009870	Chr1:33662118_33665764(+)	1.64175	54.7669	-5.06	0.0045916	0.0280081	AT4G20050-like protein (Fragment) (AHRD V1 *-*- D6PQZ4_9BRAS); contains Interpro domain(s) IPR011050 Pectin lyase fold/virulence factor	AT4G20050	59.96	0	AtQRT3	Pectin lyase-like superfamily protein;Pectin lyase-like superfamily protein;Pectin lyase-like superfamily protein	Pectate_lyase_3 Pectate lyase superfamily protein
	Up		Cla018930	Chr6:23611973_23612218(+)	37.2459	17.7957	1.06556	0.000222823	0.012665	Ras-related protein Rab-25 (AHRD V1 ***- RAB25_MOUSE); contains Interpro domain(s) IPR015595 Rab11-related	AT1G73640	83.1	1e-38	AtRABA6a	RAB GTPase homolog A6A;Rab GTPase-like A1I protein;RAB GTPase homolog A1C	Ras Ras family; Roc Ras of Complex, Roc, domain of DAPkinase
	Down		Cla009326	Chr6:5765865_5766215(+)	0.170395	37.8652	-7.79585	0.00177448	0.0199873	Rapid alkalinization factor (AHRD V1 *--- A7LIT1_LITCN); contains Interpro domain(s) IPR008801 Rapid ALkalinization Factor	AT1G28270	43.8	2e-20	AtRALFL4	ralf-like 4;ralf-like 19;ralf-like 33	RALF Rapid ALkalinization Factor (RALF)
	Up		Cla007092	Chr6:1647819_1648367(-)	8.28264	2.39184	1.79197	0.00931525	0.0381357	Ethylene responsive transcription factor 2a (AHRD V1 *-** C0J9I7_9ROSA); contains Interpro domain(s) IPR001471 Pathogenesis-related transcriptional factor and ERF, DNA-binding	AT5G13330	56.25	2e-41	AtRap2.6L	related to AP2 6l;Integrase-type DNA-binding superfamily protein;Integrase-type DNA-binding superfamily protein	AP2 AP2 domain
	Up		Cla017848	Chr10:26700771_26703976(-)	12.0521	3.32382	1.85837	0.000347951	0.0131505	AP2-like ethylene-responsive transcription factor At1g16060 (AHRD V1 *--* AP2L1_ARATH); contains Interpro domain(s) IPR001471 Pathogenesis-related transcriptional factor and ERF, DNA-binding	AT2G28550	49.57	7e-102	AtRAP2.7	related to AP2.7;Integrase-type DNA-binding superfamily protein;Integrase-type DNA-binding superfamily protein	AP2 AP2 domain
	Up		Cla000855	Chr3:12382520_12383470(+)	33.6768	12.5675	1.42206	0.00143003	0.0185128	Ethylene-responsive transcription factor 10 (AHRD V1 *-** ERF77_ARATH); contains Interpro domain(s) IPR003340 Transcriptional factor B3	AT1G13260	58.45	3e-122	AtRAV1	related to ABI3/VP1 1;related to ABI3/VP1 2;related to ABI3/VP1 2	B3 B3 DNA binding domain; AP2 AP2 domain
	Up		Cla020368	Chr5:30429023_30430069(-)	73.5321	22.8058	1.68898	0.00141962	0.0184994	Ethylene-responsive transcription factor 10 (AHRD V1 *-** ERF77_ARATH); contains Interpro domain(s) IPR003340 Transcriptional factor B3	AT1G68840	61.92	4e-140	AtRAV2	related to ABI3/VP1 2;related to ABI3/VP1 2;related to ABI3/VP1 1	B3 B3 DNA binding domain; AP2 AP2 domain
	Up		Cla017901	Chr10:27111268_27112836(-)	3.95563	1.61343	1.29377	0.000681643	0.0151892	Membrane protein (AHRD V1 **** A6MD08_9ORYZ); contains Interpro domain(s) IPR002610 Peptidase S54, rhomboid	AT2G29050	62.5	1e-109	AtRBL1	RHOMBOID-like 1;RHOMBOID-like 1;RHOMBOID-like protein 4	Rhomboid Rhomboid family
	Up		Cla011480	Chr1:2852106_2854405(+)	29.281	12.6122	1.21515	0.00715422	0.0337158	Rhomboid family protein (AHRD V1 ***- D7M0H4_ARALL); contains Interpro domain(s) IPR002610 Peptidase S54, rhomboid	AT1G63120	67.18	1e-149	AtRBL2	RHOMBOID-like 2;RHOMBOID-like protein 3;RHOMBOID-like 1	Rhomboid Rhomboid family
	Down	Down	Cla005224	Chr3:27968127_27975966(+)	2.572	17.3429	-2.75338	8.5e-05	0.00997891	Respiratory burst oxidase-like protein (AHRD V1 ***- C1IHQ9_9ROSI); contains Interpro domain(s) IPR013121 Ferric reductase, NAD binding	AT1G09090	68.27	0	AtRBOHB	respiratory burst oxidase-like protein;respiratory burst oxidase homologue D;NADPH/respiratory burst oxidase protein D	NAD_binding_6 Ferric reductase NAD binding domain; NADPH_Ox Respiratory burst NADPH oxidase; FAD_binding_8 FAD-binding domain; Ferric_reduct Ferric reductase like transmembrane component; EF-hand_7 EF-hand domain pair; EF-hand_1 EF hand
	Down	Down	Cla001877	Chr11:27019492_27024017(-)	1.65687	39.6332	-4.58018	0.000135777	0.0107871	Respiratory burst oxidase-like protein E (AHRD V1 ***- B2D0N7_HORVD); contains Interpro domain(s) IPR013121 Ferric reductase, NAD binding	AT1G19230	59.7	0	AtRBOHE	Riboflavin synthase-like superfamily protein;Riboflavin synthase-like superfamily protein;respiratory burst oxidase protein F	NAD_binding_6 Ferric reductase NAD binding domain; NADPH_Ox Respiratory burst NADPH oxidase; FAD_binding_8 FAD-binding domain; Ferric_reduct Ferric reductase like transmembrane component; EF-hand_7 EF-hand domain pair
	Up		Cla021167	Chr5:903981_905282(+)	156.992	78.1282	1.00678	0.00168173	0.0195568	Abscisic acid receptor PYL8 (AHRD V1 *--- F4KJ16_ARATH); contains Interpro domain(s) IPR019587 Polyketide cyclase/dehydrase	AT1G01360	78.16	1e-99	AtRCAR1	regulatory component of ABA receptor 1;regulatory components of ABA receptor 3;PYR1-like 7	Polyketide_cyc2 Polyketide cyclase / dehydrase and lipid transport
	Up		Cla011761	Chr7:10570728_10571833(-)	63.0473	14.8526	2.08572	0.0128132	0.0448633	NAC domain protein IPR003441 (AHRD V1 ***- B9HZY3_POPTR); contains Interpro domain(s) IPR003441 No apical meristem (NAM) protein	AT4G27410	68.55	7e-114	AtRD26	NAC (No Apical Meristem) domain transcriptional regulator superfamily protein;NAC domain containing protein 19;NAC domain containing protein 3	NAM No apical meristem (NAM) protein
	Up		Cla023407	Chr11:20462289_20463440(+)	143.39	29.5098	2.28068	0.000453016	0.0138562	NAC domain protein (AHRD V1 ***- B2ZGR7_SOYBN); contains Interpro domain(s) IPR003441 No apical meristem (NAM) protein	AT4G27410	62.93	7e-127	AtRD26	NAC (No Apical Meristem) domain transcriptional regulator superfamily protein;NAC (No Apical Meristem) domain transcriptional regulator superfamily protein;NAC domain containing protein 19	NAM No apical meristem (NAM) protein
	Up		Cla022483	Chr8:24045312_24045997(+)	15.1219	2.28785	2.72458	0.00414638	0.0269495	ST225 (AHRD V1 ***- B4YYB7_THEHA)	AT1G19530	35.56	2e-12	AtRGAT1	DNA polymerase epsilon catalytic subunit A;DNA polymerase epsilon catalytic subunit A;Big1	No hits detected that satisfy reporting thresholds
	Up		Cla021708	Chr5:5503137_5503857(+)	28.9332	11.3812	1.34608	0.00587461	0.0308043	Transcription factor bHLH95 (AHRD V1 *-*- BH095_ARATH); contains Interpro domain(s) IPR011598 Helix-loop-helix DNA-binding	AT1G49770	46.15	5e-08	AtRGE1	No Hits	No hits detected that satisfy reporting thresholds
	Down		Cla019042	Chr6:24588724_24591369(-)	2.18355	6.59414	-1.59451	0.000974551	0.0165911	Alpha-1 4-glucan-protein synthase (AHRD V1 **-- B9RLK7_RICCO); contains Interpro domain(s) IPR004901 Alpha-1,4-glucan-protein synthase, UDP-forming	AT5G15650	85.67	0	AtRGP2	reversibly glycosylated polypeptide 2;reversibly glycosylated polypeptide 1;reversibly glycosylated polypeptide 3	RGP Reversibly glycosylated polypeptide
	Down	Down	Cla002447	Chr7:23764607_23766717(-)	68.7359	191.15	-1.47557	0.00235574	0.0220289	Dtdp-glucose 4 6-dehydratase (AHRD V1 *--- B8C5W5_THAPS); contains Interpro domain(s) IPR016040 NAD(P)-binding domain	AT1G78570	89.27	0	AtRHM1	rhamnose biosynthesis 1;rhamnose biosynthesis 3;rhamnose biosynthesis 3	GDP_Man_Dehyd GDP-mannose 4,6 dehydratase; Epimerase NAD dependent epimerase/dehydratase family; RmlD_sub_bind RmlD substrate binding domain; 3Beta_HSD 3-beta hydroxysteroid dehydrogenase/isomerase family; Polysacc_synt_2 Polysaccharide biosynthesis protein; NAD_binding_4 Male sterility protein
	Down	Down	Cla022249	Chr8:21948414_21951040(+)	7.101	14.2495	-1.00482	0.0095069	0.0384242	Dtdp-glucose 4 6-dehydratase (AHRD V1 *--- B8C5W5_THAPS); contains Interpro domain(s) IPR016040 NAD(P)-binding domain	AT1G78570	77.73	0	AtRHM1	rhamnose biosynthesis 1;NAD-dependent epimerase/dehydratase family protein;rhamnose biosynthesis 3	GDP_Man_Dehyd GDP-mannose 4,6 dehydratase; Epimerase NAD dependent epimerase/dehydratase family; RmlD_sub_bind RmlD substrate binding domain; 3Beta_HSD 3-beta hydroxysteroid dehydrogenase/isomerase family; Polysacc_synt_2 Polysaccharide biosynthesis protein; NAD_binding_4 Male sterility protein
	Down		Cla011157	Chr3:25819679_25821309(-)	2.13925	10.6745	-2.31899	0.000743581	0.0155109	Receptor-like protein kinase At3g21340 (AHRD V1 **** RLK6_ARATH); contains Interpro domain(s) IPR002290 Serine/threonine protein kinase	AT2G05940	59.69	6e-177	AtRIPK	Protein kinase superfamily protein;Protein kinase superfamily protein;Protein kinase superfamily protein	Pkinase_Tyr Protein tyrosine kinase; Pkinase Protein kinase domain
	Up		Cla013213	Chr5:12877737_12879824(+)	3.17358	1.49214	1.08873	0.0143402	0.0474593	Receptor-like protein kinase 1-like (AHRD V1 *-** Q5ZBN0_ORYSJ); contains Interpro domain(s) IPR002290 Serine/threonine protein kinase	AT1G48480	55.88	0	AtRKL1	receptor-like kinase 1;receptor-like kinase 902;Leucine-rich repeat protein kinase family protein	Pkinase Protein kinase domain; Pkinase_Tyr Protein tyrosine kinase; LRR_8 Leucine rich repeat; LRRNT_2 Leucine rich repeat N-terminal domain; LRR_4 Leucine Rich repeats (2 copies)
	Down		Cla016559	Chr11:22577763_22578074(+)	11.4984	83.7653	-2.86492	0.00180316	0.0200471	Myb family transcription factor (Fragment) (AHRD V1 **-- D7KSM0_ARALL); contains Interpro domain(s) IPR001005 SANT, DNA-binding	AT1G75250	59.41	3e-32	AtRL6	RAD-like 6;Homeodomain-like superfamily protein;RAD-like 6	No hits detected that satisfy reporting thresholds
	Up		Cla007043	Chr6:1106043_1110274(-)	11.7803	1.2841	3.19755	0.000136886	0.0107871	Reduced male fertility protein (AHRD V1 ***- F4JFG0_ARATH)	AT3G61730	55.12	2e-122	AtRMF	reduced male fertility;F-box protein RMF;F-box protein RMF	No hits detected that satisfy reporting thresholds
	Up		Cla016999	Chr10:21180685_21180939(+)	154.207	40.0817	1.94385	0.00471757	0.0281925	Ribonuclease MC (AHRD V1 **** RNMC_MOMCH); contains Interpro domain(s) IPR001568 Ribonuclease T2	AT2G02990	28.17	1e-06	AtRNS1	ribonuclease 1	Ribonuclease_T2 Ribonuclease T2 family
	Up		Cla009788	Chr1:32918864_32919214(+)	10.8432	0.535068	4.34093	0.00163689	0.0192389	Glutaredoxin (AHRD V1 ***- B9GZC7_POPTR); contains Interpro domain(s) IPR011905 Glutaredoxin-like, plant II	AT5G14070	51.38	5e-29	AtROXY2	Thioredoxin superfamily protein;Thioredoxin superfamily protein;Glutaredoxin family protein	Glutaredoxin Glutaredoxin
	Down		Cla009473	Chr9:18673485_18673802(+)	6.81989	18.5514	-1.4437	0.0152878	0.0491429	Glutaredoxin (AHRD V1 ***- B9I9W2_POPTR); contains Interpro domain(s) IPR011905 Glutaredoxin-like, plant II	AT2G30540	63	5e-40	AtROXY7	Thioredoxin superfamily protein;Glutaredoxin family protein;Thioredoxin superfamily protein	Glutaredoxin Glutaredoxin
	Down		Cla015111	Chr9:4274941_4278943(+)	0.114641	3.78549	-5.04529	0.000689022	0.0152621	Response regulator 10 (AHRD V1 *-*- Q948L2_MAIZE); contains Interpro domain(s) IPR001789 Signal transduction response regulator, receiver region	AT3G16857	33.33	5e-30	AtRR1	response regulator 1;response regulator 1;response regulator 2	Response_reg Response regulator receiver domain
	Up		Cla007300	Chr7:6650988_6653145(+)	3.21253	1.47842	1.11965	0.0121692	0.0436089	Response regulator protein (AHRD V1 ***- Q9AXD7_DIACA); contains Interpro domain(s) IPR001789 Signal transduction response regulator, receiver region	AT3G56380	58.46	7e-41	AtRR17	response regulator 17;response regulator 17;response regulator 16	Response_reg Response regulator receiver domain
	Down		Cla007869	Chr11:10667014_10668400(-)	0.826791	152.428	-7.52639	0.00153681	0.0189334	Sensor histidine kinase/response regulator (AHRD V1 ***- A5F880_VIBC3); contains Interpro domain(s) IPR001789 Signal transduction response regulator, receiver region	AT5G26594	48.36	7e-34	AtRR24	response regulator 24;response regulator 22;response regulator 22	Response_reg Response regulator receiver domain
	Down		Cla018538	Chr4:23118801_23121386(-)	7.51035	19.007	-1.33958	0.00112307	0.0174265	Os03g0169000 protein (Fragment) (AHRD V1 **-- Q0DUS7_ORYSJ); contains Interpro domain(s) IPR004348 Protein of unknown function DUF246, plant	AT5G15740	69.05	0	AtRRT1	O-fucosyltransferase family protein;O-fucosyltransferase family protein;O-fucosyltransferase family protein	O-FucT GDP-fucose protein O-fucosyltransferase
	Down		Cla008225	Chr3:1248872_1249192(+)	1.71526	5.94927	-1.79428	0.00535383	0.0297477	DVL13 (AHRD V1 **-- Q8L7D0_ARATH); contains Interpro domain(s) IPR012552 DVL	AT2G29125	50.43	3e-18	AtRTFL2	ROTUNDIFOLIA like 2;ROTUNDIFOLIA like 3;ROTUNDIFOLIA like 5	DVL DVL family
	Up		Cla015092	Chr9:4438957_4439374(+)	1086.29	498.558	1.12358	0.00195589	0.0206744	Late embryogenesis abundant protein 5 (AHRD V1 ***- Q1HGG0_9ROSI); contains Interpro domain(s) IPR004926 Late embryogenesis abundant protein 3	AT4G02380	58.1	5e-28	AtSAG21	senescence-associated gene 21;senescence-associated gene 21;Late embryogenesis abundant 3 (LEA3) family protein	LEA_3 Late embryogenesis abundant protein
	Down		Cla017398	Chr10:16138455_16138877(+)	0.320204	3.32473	-3.37617	0.0117623	0.0428845	Late embryogenesis abundant protein 5 (AHRD V1 ***- Q1HGG0_9ROSI); contains Interpro domain(s) IPR004926 Late embryogenesis abundant protein 3	AT4G02380	43.16	4e-15	AtSAG21	senescence-associated gene 21;senescence-associated gene 21;senescence-associated gene 21	LEA_3 Late embryogenesis abundant protein
	Down	Down	Cla001496	Chr6:1901429_1903639(+)	2.81365	263.877	-6.55128	0.000190922	0.0121153	Bidirectional sugar transporter N3 (AHRD V1 ***- NOD3_MEDTR); contains Interpro domain(s) IPR018179 RAG1-activating protein 1 homologue IPR004316 RAG1-activating protein-1-related	AT5G13170	60.7	4e-91	AtSAG29	senescence-associated gene 29;bidirectional sugar transporter SWEET12-like protein;Nodulin MtN3 family protein	MtN3_slv Sugar efflux transporter for intercellular exchange
	Down		Cla006247	Chr5:7609420_7609875(-)	2.96728	11.5812	-1.96457	0.00822089	0.036138	Zinc finger A20 and AN1 domain-containing stress-associated protein 9 (AHRD V1 **** SAP9_ORYSJ); contains Interpro domain(s) IPR000058 Zinc finger, AN1-type	AT4G25380	43.54	8e-29	AtSAP10	stress-associated protein 10;A20/AN1-like zinc finger family protein;A20/AN1-like zinc finger family protein	zf-A20 A20-like zinc finger; zf-AN1 AN1-like Zinc finger
	Down		Cla018490	Chr4:22539862_22541758(-)	3.39659	26.8462	-2.98256	5.17e-05	0.00976752	Calmodulin-binding protein (Fragment) (AHRD V1 ***- C0SV51_ARATH); contains Interpro domain(s) IPR012416 Calmodulin binding protein-like	AT1G73805	55.77	3e-94	AtSARD1	Calmodulin binding protein-like protein;Calmodulin-binding protein;Calmodulin-binding protein	Calmodulin_bind Calmodulin binding protein-like
	Up		Cla015865	Chr2:4237014_4237226(+)	9.19586	4.23072	1.12008	0.00701492	0.0334271	Auxin-induced SAUR-like protein (AHRD V1 ***- Q8S351_CAPAN); contains Interpro domain(s) IPR003676 Auxin responsive SAUR protein	AT4G38840	67.65	3e-31	AtSAUR14	SAUR-like auxin-responsive protein family;SAUR-like auxin-responsive protein family;SAUR-like auxin-responsive protein family	Auxin_inducible Auxin responsive protein
	Up		Cla015856	Chr2:4172956_4173294(-)	16.2166	6.51507	1.31562	0.00160543	0.0191231	Auxin-induced SAUR-like protein (AHRD V1 ***- Q8S351_CAPAN); contains Interpro domain(s) IPR003676 Auxin responsive SAUR protein	AT4G34780	50	9e-29	AtSAUR2	SAUR-like auxin-responsive protein family;SAUR-like auxin-responsive protein family;SAUR-like auxin-responsive protein family	Auxin_inducible Auxin responsive protein
	Up		Cla009987	Chr5:33006683_33007192(+)	9.35046	3.12649	1.58049	0.000896822	0.016244	SAUR-like auxin-responsive protein (AHRD V1 ***- Q2V359_ARATH); contains Interpro domain(s) IPR003676 Auxin responsive SAUR protein	AT2G24400	55	9e-56	AtSAUR38	SAUR-like auxin-responsive protein family;SAUR-like auxin-responsive protein family;SAUR-like auxin-responsive protein family	Auxin_inducible Auxin responsive protein
	Up		Cla005087	Chr3:2977473_2977904(+)	6.30587	2.57902	1.28987	0.00154094	0.0189334	SAUR-like auxin-responsive protein (AHRD V1 *-*- Q2V359_ARATH); contains Interpro domain(s) IPR003676 Auxin responsive SAUR protein	AT2G28085	53.78	3e-31	AtSAUR42	SAUR-like auxin-responsive protein family;SAUR-like auxin-responsive protein family;SAUR-like auxin-responsive protein family	Auxin_inducible Auxin responsive protein
	Up		Cla001500	Chr6:1949767_1950294(+)	11.7382	4.84938	1.27534	0.000874083	0.0161604	SAUR-like auxin-responsive protein (AHRD V1 ***- Q2V359_ARATH); contains Interpro domain(s) IPR003676 Auxin responsive SAUR protein	AT5G50760	38.76	9e-20	AtSAUR55	SAUR-like auxin-responsive protein family;SAUR-like auxin-responsive protein family;SAUR-like auxin-responsive protein family	Auxin_inducible Auxin responsive protein
	Down		Cla007436	Chr5:23308800_23312276(+)	2.06147	20.8998	-3.34175	0.00445181	0.0277249	Subtilisin-like protease (AHRD V1 **-- Q9ZSP5_ARATH); contains Interpro domain(s) IPR015500 Peptidase S8, subtilisin-related	AT1G20160	60.88	0	ATSBT5.2	Subtilisin-like serine endopeptidase family protein;Subtilisin-like serine endopeptidase family protein;Subtilisin-like serine endopeptidase family protein	Peptidase_S8 Subtilase family; fn3_6 Fibronectin type-III domain; Inhibitor_I9 Peptidase inhibitor I9; PA PA domain
	Down	Down	Cla011025	Chr1:17074342_17077122(-)	0.00536333	7.45164	-10.4402	0.000991893	0.0166612	Subtilisin-like protease (AHRD V1 ***- Q6WNU4_SOYBN); contains Interpro domain(s) IPR015500 Peptidase S8, subtilisin-related	AT5G59810	59.76	0	AtSBT5.4	Subtilase family protein;Subtilisin-like serine endopeptidase family protein;Subtilase family protein	Peptidase_S8 Subtilase family; fn3_6 Fibronectin type-III domain; PA PA domain
	Down		Cla015656	Chr2:2407601_2409801(-)	14.8752	30.2127	-1.02225	6.17e-05	0.00981466	Rho GDP-dissociation inhibitor family protein (AHRD V1 ***- D7L724_ARALL); contains Interpro domain(s) IPR000406 RHO protein GDP dissociation inhibitor	AT3G07880	76.85	3e-116	AtSCN1	Immunoglobulin E-set superfamily protein;Immunoglobulin E-set superfamily protein;Immunoglobulin E-set superfamily protein	Rho_GDI RHO protein GDP dissociation inhibitor
	Down	Down	Cla020029	Chr2:24700369_24706170(+)	35.3201	109.401	-1.63107	0.000431824	0.0136765	Serine carboxypeptidase K10B2.2 (AHRD V1 ***- B6TM29_MAIZE); contains Interpro domain(s) IPR001563 Peptidase S10, serine carboxypeptidase	AT4G30810	57.79	0	Atscpl29	serine carboxypeptidase-like 29;serine carboxypeptidase-like 27;serine carboxypeptidase-like 26	Peptidase_S10 Serine carboxypeptidase
	Down		Cla013860	Chr8:15767920_15772977(-)	5.14643	10.704	-1.0565	0.000676068	0.0151746	Serine carboxypeptidase F13S12.6 (AHRD V1 ***- B6U5K7_MAIZE); contains Interpro domain(s) IPR001563 Peptidase S10, serine carboxypeptidase	AT5G42240	77.07	0	Atscpl42	serine carboxypeptidase-like 42;serine carboxypeptidase-like 44;serine carboxypeptidase-like 43	Peptidase_S10 Serine carboxypeptidase
	Down		Cla015176	Chr9:3740160_3741391(-)	0.32981	2.53739	-2.94363	0.00112723	0.0174297	3-beta hydroxysteroid dehydrogenase (AHRD V1 ***- Q5Q1I4_9LAMI); contains Interpro domain(s) IPR002198 Short-chain dehydrogenase/reductase SDR	AT2G47140	52.94	3e-93	AtSDR5	NAD(P)-binding Rossmann-fold superfamily protein;NAD(P)-binding Rossmann-fold superfamily protein;NAD(P)-binding Rossmann-fold superfamily protein	adh_short_C2 Enoyl-(Acyl carrier protein) reductase; adh_short short chain dehydrogenase; KR KR domain
	Up		Cla002207	Chr7:7445579_7449168(-)	2.62407	0.740943	1.82437	0.00371113	0.0258661	Cyclin (AHRD V1 *-*- Q39331_BRANA); contains Interpro domain(s) IPR011028 Cyclin-like	AT1G14750	34.06	2e-64	AtSDS	Cyclin family protein;Cyclin family protein;Cyclin family protein	Cyclin_N Cyclin, N-terminal domain; Cyclin_C Cyclin, C-terminal domain
	Up		Cla014327	Chr1:30031832_30034231(-)	28.1452	9.3355	1.59209	0.00818501	0.0361219	Thiosulfate sulfurtransferase glpE (AHRD V1 *--- GLPE_YERPE); contains Interpro domain(s) IPR001763 Rhodanese-like	AT4G35770	62.88	4e-54	AtSEN1	Rhodanese/Cell cycle control phosphatase superfamily protein;sulfurtransferase protein 16;Rhodanese/Cell cycle control phosphatase superfamily protein	Rhodanese Rhodanese-like domain
	Up		Cla007551	Chr6:7374697_7379286(+)	7.57128	2.98595	1.34235	0.00672322	0.0327972	Sieve element occlusion b (AHRD V1 ***- E2FKK4_MALDO)	AT3G01680	26.71	5e-67	AtSEOR1	sieve element occlusion amino-terminus protein;sieve element occlusion protein;sieve element occlusion protein	SEO_N Sieve element occlusion N-terminus; SEO_C Sieve element occlusion C-terminus
	Down		Cla002584	Chr3:3620005_3621328(+)	57.344	153.163	-1.41736	0.00105161	0.0170334	GDSL esterase/lipase (AHRD V1 ***- F4HY89_ARATH); contains Interpro domain(s) IPR001087 Lipase, GDSL	AT3G48460	60.37	2e-169	AtSFAR4	GDSL-like Lipase/Acylhydrolase superfamily protein;GDSL-like Lipase/Acylhydrolase superfamily protein;GDSL-like Lipase/Acylhydrolase superfamily protein	No hits detected that satisfy reporting thresholds
	Down		Cla001917	Chr11:26569617_26575010(+)	6.42095	29.0658	-2.17846	0.0035654	0.0255559	Lysine ketoglutarate reductase trans-splicing related 1-like (AHRD V1 **-- Q5JLN0_ORYSJ); contains Interpro domain(s) IPR007877 Protein of unknown function DUF707	AT4G18530	55.12	3e-139	AtSGC	lysine ketoglutarate reductase trans-splicing-like protein%2C putative (DUF707);lysine ketoglutarate reductase trans-splicing-like protein%2C putative (DUF707);GTPase Der (DUF707)	DUF707 Protein of unknown function (DUF707)
	Up		Cla010486	Chr2:11529428_11531055(+)	16.6898	4.91981	1.7623	0.0011736	0.0177074	Ras-related protein Rab-18 (AHRD V1 *-*- C1BRC7_9MAXI); contains Interpro domain(s) IPR017231 Small GTPase, Tem1	AT3G21700	76.04	5e-103	AtSGP2	Ras-related small GTP-binding family protein;Ras-related small GTP-binding family protein;Ras-related small GTP-binding family protein	Ras Ras family; Roc Ras of Complex, Roc, domain of DAPkinase
	Down		Cla019630	Chr3:7847091_7854121(-)	8.17853	17.0175	-1.0571	0.00909192	0.037799	MADS-box transcription factor AGAMOUS (AHRD V1 ***- Q8GTY3_HELAN); contains Interpro domain(s) IPR002487 Transcription factor, K-box	AT3G58780	71	7e-97	AtSHP1	K-box region and MADS-box transcription factor family protein;K-box region and MADS-box transcription factor family protein;K-box region and MADS-box transcription factor family protein	K-box K-box region; SRF-TF SRF-type transcription factor (DNA-binding and dimerisation domain)
	Down	Down	Cla023372	Chr11:20073801_20077947(-)	33.9748	93.4607	-1.45989	0.00170419	0.0195671	Alkaline alpha galactosidase I (AHRD V1 **-- Q3Y5A3_CUCSA); contains Interpro domain(s) IPR008811 Raffinose synthase	AT1G55740	71.69	0	AtSIP1	seed imbibition 1;seed imbibition 2;seed imbibition 2	Raffinose_syn Raffinose synthase or seed imbibition protein Sip1
	Down		Cla017113	Chr10:19842798_19847661(-)	1.7946	9.90016	-2.46379	0.00118145	0.0177147	Stachyose synthase (AHRD V1 **-- B6ST00_MAIZE); contains Interpro domain(s) IPR008811 Raffinose synthase	AT5G40390	69.48	0	AtSIP1	Raffinose synthase family protein;stachyose synthase;stachyose synthase	Raffinose_syn Raffinose synthase or seed imbibition protein Sip1
	Up	Up	Cla018165	Chr4:19278230_19279975(-)	104.453	40.547	1.36519	0.00412993	0.0269048	Unknown Protein (AHRD V1)	AT5G02020	54.01	3e-36	AtSIS	E3 ubiquitin-protein ligase RLIM-like protein;E3 ubiquitin-protein ligase RLIM-like protein;plant/protein	No hits detected that satisfy reporting thresholds
	Up		Cla006924	Chr6:51464_56040(-)	48.07	21.4594	1.16353	0.000257705	0.012665	Kinase family protein (AHRD V1 **** D7M6L5_ARALL); contains Interpro domain(s) IPR002290 Serine/threonine protein kinase	AT4G00720	78.84	0	AtSK32	shaggy-like protein kinase 32;shaggy-like kinase 13;shaggy-like kinase 13	Pkinase Protein kinase domain; Pkinase_Tyr Protein tyrosine kinase
	Down		Cla020544	Chr5:28844340_28844825(+)	12.0129	28.3544	-1.23899	0.00694708	0.0332374	S-phase kinase-associated protein 1 (AHRD V1 **-- B9EQ59_SALSA); contains Interpro domain(s) IPR016897 E3 ubiquitin ligase, SCF complex, Skp subunit	AT1G20140	42.94	5e-39	AtSK4	SKP1-like 4;SKP1-like 9;SKP1-like 12	Skp1 Skp1 family, dimerisation domain; Skp1_POZ Skp1 family, tetramerisation domain
	Down	Down	Cla009806	Chr1:33100339_33102066(+)	3.67805	8.96011	-1.28458	0.00904214	0.0377285	F-box family protein (AHRD V1 ***- D7M2J7_ARALL); contains Interpro domain(s) IPR001810 Cyclin-like F-box	AT4G05460	54.97	2e-100	AtSKIP19	RNI-like superfamily protein;RNI-like superfamily protein;RNI-like superfamily protein	F-box-like F-box-like; F-box F-box domain
	Down		Cla018671	Chr4:24300124_24301965(-)	0.721401	4.06126	-2.49306	0.013779	0.0465538	Laccase-3 (AHRD V1 **-- LAC3_ARATH); contains Interpro domain(s) IPR001117 Multicopper oxidase, type 1	AT1G55570	74.36	0	Atsks12	SKU5 similar 12;SKU5 similar 11;SKU5 similar 14	Cu-oxidase Multicopper oxidase; Cu-oxidase_3 Multicopper oxidase; Cu-oxidase_2 Multicopper oxidase
	Down		Cla020181	Chr2:22724326_22729422(-)	0.437135	5.01725	-3.52075	0.0015833	0.0191037	Laccase-2 (AHRD V1 **-- LAC2_ORYSJ); contains Interpro domain(s) IPR011707 Multicopper oxidase, type 3	AT4G37160	66.17	0	Atsks15	SKU5 similar 15;SKU5 similar 16;SKU5 similar 16	Cu-oxidase_3 Multicopper oxidase; Cu-oxidase Multicopper oxidase; Cu-oxidase_2 Multicopper oxidase
	Down		Cla002404	Chr7:23237522_23243662(+)	23.948	49.8917	-1.05889	5.65e-05	0.00976752	Band 7 stomatin family protein (AHRD V1 **-- C1MUP6_MICPC); contains Interpro domain(s) IPR001107 Band 7 protein	AT4G27585	68.78	1e-179	AtSLP1	SPFH/Band 7/PHB domain-containing membrane-associated protein family;SPFH/Band 7/PHB domain-containing membrane-associated protein family;SPFH/Band 7/PHB domain-containing membrane-associated protein family	Band_7 SPFH domain / Band 7 family; Band_7_C C-terminal region of band_7
	Down	Down	Cla020288	Chr2:21191036_21193354(+)	107.943	277.907	-1.36433	0.00457044	0.0280081	Subtilisin-like protease (AHRD V1 ***- A9XG40_TOBAC); contains Interpro domain(s) IPR015500 Peptidase S8, subtilisin-related	AT4G34980	74.28	0	AtSLP2	subtilisin-like serine protease 2;Subtilase family protein;Subtilase family protein	Peptidase_S8 Subtilase family; fn3_6 Fibronectin type-III domain; PA PA domain; Inhibitor_I9 Peptidase inhibitor I9
	Down		Cla005739	Chr11:10949048_10951105(-)	4.40206	17.9948	-2.03133	0.000106251	0.0103379	ZIP4/SPO22 (AHRD V1 **-- A5Y6I6_ARATH)	AT5G48390	59.45	0	ATSPO22	Tetratricopeptide repeat (TPR)-like superfamily protein	SPO22 Meiosis protein SPO22/ZIP4 like
	Down		Cla020967	Chr5:25063616_25067681(+)	8.56827	24.2127	-1.49869	0.000295197	0.0129433	SPX domain-containing protein 3 (AHRD V1 ***- E5D6S7_PHAVU); contains Interpro domain(s) IPR004331 SPX, N-terminal	AT2G26660	52.16	2e-74	AtSPX2	SPX domain-containing protein 2 (SPX2);SPX domain-containing protein 1;SPX domain-containing protein 4	SPX SPX domain
	Down		Cla006686	Chr6:3137879_3142190(+)	0.125423	2.27462	-4.18076	0.00301974	0.0238424	SPX domain-containing protein (AHRD V1 ***- D7LBV7_ARALL); contains Interpro domain(s) IPR004331 SPX, N-terminal	AT2G45130	55.95	1e-95	AtSPX3	SPX domain protein 3;SPX domain-containing protein 1;SPX domain-containing protein 2 (SPX2)	SPX SPX domain
	Up		Cla017526	Chr10:23622592_23630627(-)	8.9898	4.3508	1.04701	0.00384005	0.0262821	Receptor-like kinase (AHRD V1 *-** A7VM48_9VIRI); contains Interpro domain(s) IPR002290 Serine/threonine protein kinase	AT5G06820	46.01	0	AtSRF2	STRUBBELIG-receptor family 2;STRUBBELIG-receptor family 8;STRUBBELIG-receptor family 7	DUF599 Protein of unknown function, DUF599; Pkinase Protein kinase domain; Pkinase_Tyr Protein tyrosine kinase; LRR_8 Leucine rich repeat; LRRNT_2 Leucine rich repeat N-terminal domain
	Down	Down	Cla002889	Chr10:22168285_22172398(+)	11.509	74.5432	-2.69531	0.00022141	0.012665	Strictosidine synthase family protein (AHRD V1 **-- D7LVM7_ARALL); contains Interpro domain(s) IPR004141 Strictosidine synthase	AT2G41290	47.81	9e-117	AtSSL2	strictosidine synthase-like 2;Calcium-dependent phosphotriesterase superfamily protein;Calcium-dependent phosphotriesterase superfamily protein	Str_synth Strictosidine synthase; SGL SMP-30/Gluconolactonase/LRE-like region
	Down	Down	Cla011486	Chr1:2913983_2917029(-)	0.406313	14.43	-5.15033	9.14e-05	0.010233	Membrane transporter D1 (AHRD V1 **** GTR1_LEIDO); contains Interpro domain(s) IPR003663 Sugar/inositol transporter	AT1G11260	67.66	0	AtSTP1	sugar transporter 1;sugar transporter protein 12;sugar transporter 9	Sugar_tr Sugar (and other) transporter; MFS_1 Major Facilitator Superfamily
	Down	Down	Cla019454	Chr3:5391318_5394838(-)	15.2387	64.9762	-2.09217	0.00116087	0.0175864	Membrane transporter D1 (AHRD V1 **** GTR1_LEIDO); contains Interpro domain(s) IPR003663 Sugar/inositol transporter	AT1G11260	81.32	0	AtSTP1	sugar transporter 1;sugar transporter protein 12;Major facilitator superfamily protein	Sugar_tr Sugar (and other) transporter; MFS_1 Major Facilitator Superfamily
	Down		Cla016281	Chr9:10408304_10408852(+)	16.5553	35.9622	-1.11919	0.0079494	0.0356233	Small ubiquitin-related modifier 2 (AHRD V1 ***- F4K3D6_ARATH); contains Interpro domain(s) IPR000626 Ubiquitin	AT5G55160	57.61	4e-31	AtSUMO2	small ubiquitin-like modifier 2;small ubiquitin-like modifier 1;small ubiquitin-like modifier 2	Rad60-SLD Ubiquitin-2 like Rad60 SUMO-like; ubiquitin Ubiquitin family
	Up		Cla007894	Chr11:9761455_9763616(-)	4.31671	1.74074	1.31023	0.0139471	0.0467532	Histone-lysine N-methyltransferase SUVR2 (AHRD V1 *-** F4K7E3_ARATH); contains Interpro domain(s) IPR018848 WIYLD domain	AT5G43990	46.88	3e-14	AtSUVR2	No Hits	WIYLD Ubiquitin-binding WIYLD domain
	Up		Cla007895	Chr11:9757843_9758580(-)	5.03092	2.14289	1.23127	0.0126717	0.0446129	Histone-lysine N-methyltransferase SUVR2 (AHRD V1 ***- F4K7E3_ARATH); contains Interpro domain(s) IPR003606 Pre-SET zinc-binding sub-group	AT3G04380	53.06	5e-71	AtSUVR4	SET-domain containing protein lysine methyltransferase family protein;SET-domain containing protein lysine methyltransferase family protein;SET-domain containing protein lysine methyltransferase family protein	Pre-SET Pre-SET motif
	Up		Cla007896	Chr11:9749325_9752864(-)	3.67835	0.947906	1.95624	0.00162743	0.019227	Histone-lysine N-methyltransferase H3 lysine-9 specific 5 (AHRD V1 ***- F4X094_ACREC); contains Interpro domain(s) IPR001214 SET	AT3G04380	75.78	3e-88	AtSUVR4	SET-domain containing protein lysine methyltransferase family protein;SET-domain containing protein lysine methyltransferase family protein;SET-domain containing protein lysine methyltransferase family protein	SET SET domain
	Down		Cla010988	Chr1:18083278_18083769(-)	286.888	698.538	-1.28385	0.00143138	0.0185128	Susceptibility homeodomain transcription factor (Fragment) (AHRD V1 *-*- Q8SAA7_ORYSA); contains Interpro domain(s) IPR007493 Protein of unknown function DUF538	AT1G56580	65.03	3e-65	AtSVB	plant/protein (Protein of unknown function%2C DUF538);plant/protein (Protein of unknown function%2C DUF538);hypothetical protein (Protein of unknown function%2C DUF538)	DUF538 Protein of unknown function, DUF538
	Down	Down	Cla011332	Chr1:1377475_1377939(-)	0.425568	196.92	-8.85401	0.000302077	0.0129433	Susceptibility homeodomain transcription factor (Fragment) (AHRD V1 ***- Q8SAA7_ORYSA); contains Interpro domain(s) IPR007493 Protein of unknown function DUF538	AT4G24130	67.79	2e-68	AtSVB5	DUF538 family protein (Protein of unknown function%2C DUF538);plant/protein (Protein of unknown function%2C DUF538);plant/protein (Protein of unknown function%2C DUF538)	DUF538 Protein of unknown function, DUF538
	Down		Cla013865	Chr8:15707904_15711309(-)	28.9758	136.004	-2.23073	0.000367425	0.0133364	Bidirectional sugar transporter N3 (AHRD V1 ***- NOD3_MEDTR); contains Interpro domain(s) IPR018179 RAG1-activating protein 1 homologue IPR004316 RAG1-activating protein-1-related	AT1G21460	64.23	4e-117	AtSWEET1	Nodulin MtN3 family protein;Nodulin MtN3 family protein;Nodulin MtN3 family protein	MtN3_slv Sugar efflux transporter for intercellular exchange
	Up		Cla004957	Chr1:811473_816056(+)	4.34556	2.1484	1.01628	0.00184399	0.020095	Protein DYAD (AHRD V1 **-- DYAD_ARATH)	AT5G51330	43.56	2e-146	AtSWI1	SWITCH1;SWITCH1;DYAD protein	No hits detected that satisfy reporting thresholds
	Down	Down	Cla016267	Chr9:10494804_10496458(+)	0.557383	19.8363	-5.15333	0.000323833	0.0129433	Trichome birefringence (AHRD V1 **-- D9I8D9_ARATH); contains Interpro domain(s) IPR004253 Protein of unknown function DUF231, plant	AT3G12060	44.6	5e-94	AtTBL1	trichome birefringence-like protein (DUF828);trichome birefringence-like protein (DUF828);trichome birefringence-like protein (DUF828)	PC-Esterase GDSL/SGNH-like Acyl-Esterase family found in Pmr5 and Cas1p; PMR5N PMR5 N terminal Domain
	Down		Cla017064	Chr10:20422265_20423315(-)	0.715377	3.60739	-2.33418	0.00902193	0.0377285	Leaf senescence protein-like (AHRD V1 *-*- Q5VQ36_ORYSJ)	AT3G28150	48.07	3e-41	AtTBL22	TRICHOME BIREFRINGENCE-LIKE 22	PMR5N PMR5 N terminal Domain; PC-Esterase GDSL/SGNH-like Acyl-Esterase family found in Pmr5 and Cas1p
	Down		Cla017065	Chr10:20418650_20419324(-)	0.556321	3.19488	-2.52177	0.00879665	0.0372856	Leaf senescence protein-like (AHRD V1 ***- Q67VA1_ORYSJ); contains Interpro domain(s) IPR004253 Protein of unknown function DUF231, plant	AT3G28150	54.05	4e-84	AtTBL22	TRICHOME BIREFRINGENCE-LIKE 22;TRICHOME BIREFRINGENCE-LIKE 19;TRICHOME BIREFRINGENCE-LIKE 19	PC-Esterase GDSL/SGNH-like Acyl-Esterase family found in Pmr5 and Cas1p
	Down		Cla018098	Chr4:18598153_18601137(-)	0.668333	3.92434	-2.55381	0.000981002	0.0165911	Protein trichome birefringence-like 33 (AHRD V1 **-- F4IH21_ARATH); contains Interpro domain(s) IPR004253 Protein of unknown function DUF231, plant	AT5G01360	63.66	0	AtTBL3	trichome birefringence-like protein (DUF828);trichome birefringence-like protein (DUF828);trichome birefringence-like protein (DUF828)	PC-Esterase GDSL/SGNH-like Acyl-Esterase family found in Pmr5 and Cas1p; PMR5N PMR5 N terminal Domain
	Down		Cla018418	Chr4:21807002_21810106(-)	0.574121	4.35032	-2.9217	0.000485631	0.0138562	Os06g0207500 protein (Fragment) (AHRD V1 ***- Q0DDQ9_ORYSJ); contains Interpro domain(s) IPR004253 Protein of unknown function DUF231, plant	AT3G11570	69.55	2e-150	AtTBL8	TRICHOME BIREFRINGENCE-LIKE 8;TRICHOME BIREFRINGENCE-LIKE 9;TRICHOME BIREFRINGENCE-LIKE 9	PC-Esterase GDSL/SGNH-like Acyl-Esterase family found in Pmr5 and Cas1p
	Up		Cla006219	Chr5:7945454_7946491(-)	9.96118	4.63121	1.10493	0.00380549	0.0261617	Transcription factor-like (AHRD V1 *-*- Q650T3_ORYSJ); contains Interpro domain(s) IPR005333 Transcription factor, TCP	AT5G51910	49.81	2e-62	AtTCP19	TCP family transcription factor;TCP family transcription factor;TCP family transcription factor	TCP TCP family transcription factor
	Down		Cla019144	Chr6:25444109_25445516(+)	2.25945	81.309	-5.16937	0.0137011	0.046423	MYB transcription factor (AHRD V1 *-** Q9LSI7_ARATH); contains Interpro domain(s) IPR015495 Myb transcription factor	AT3G28470	72.34	4e-66	AtTDF1	Duplicated homeodomain-like superfamily protein;myb domain protein 103;myb domain protein 16	Myb_DNA-binding Myb-like DNA-binding domain; Myb_DNA-bind_6 Myb-like DNA-binding domain
	Down	Down	Cla018934	Chr6:23644106_23645116(+)	0.193337	184.222	-9.89611	5.06e-05	0.00976752	AT-hook DNA-binding protein (Fragment) (AHRD V1 *--- A1DR81_CATRO); contains Interpro domain(s) IPR014476 Predicted AT-hook DNA-binding	AT2G42940	63.77	4e-103	AtTEK	Putative AT-hook DNA-binding family protein;Putative AT-hook DNA-binding family protein;AT-hook motif nuclear-localized protein 18	DUF296 Plants and Prokaryotes Conserved (PCC) domain
	Up		Cla022728	Chr8:26042252_26044871(+)	6.84873	3.03365	1.17478	0.00131317	0.0182864	MEI2-like 2 protein (AHRD V1 *--- F4IP94_ARATH); contains Interpro domain(s) IPR007201 RNA recognition motif 2	AT3G26120	48.42	5e-147	AtTEL1	terminal EAR1-like 1;terminal EAR1-like 2;MEI2-like protein 1	RRM_2 RNA recognition motif 2; RRM_1 RNA recognition motif. (a.k.a. RRM, RBD, or RNP domain)
	Up		Cla005057	Chr3:2652549_2658417(-)	4.18221	1.58335	1.40128	0.00188641	0.0203131	Senescence-associated protein (AHRD V1 **-- B6T9C5_MAIZE); contains Interpro domain(s) IPR018499 Tetraspanin	AT3G45600	74.74	2e-162	AtTET3	tetraspanin3;tetraspanin4;tetraspanin3	Tetraspanin Tetraspanin family
	Down	Down	Cla002563	Chr2:16946219_16949999(+)	26.7945	1103.01	-5.36337	0.0126894	0.0446177	Dihydroflavonol 4-reductase family (AHRD V1 ***- D7MD06_ARALL); contains Interpro domain(s) IPR016040 NAD(P)-binding domain	AT4G35420	72.12	3e-174	AtTKPR1	dihydroflavonol 4-reductase-like1;NAD(P)-binding Rossmann-fold superfamily protein;NAD(P)-binding Rossmann-fold superfamily protein	Epimerase NAD dependent epimerase/dehydratase family; NAD_binding_4 Male sterility protein; 3Beta_HSD 3-beta hydroxysteroid dehydrogenase/isomerase family; GDP_Man_Dehyd GDP-mannose 4,6 dehydratase; NAD_binding_10 NAD(P)H-binding
	Down		Cla009772	Chr1:32729713_32730933(-)	2.96875	6.54477	-1.14049	0.00396243	0.0265316	Os11g0198100 protein (Fragment) (AHRD V1 *-*- Q0IU20_ORYSJ); contains Interpro domain(s) IPR006852 Protein of unknown function DUF616	AT5G46220	65.9	1e-163	AtTOD1	transmembrane protein (DUF616);strawberry notch protein (DUF616);tRNA (met) cytidine acetyltransferase%2C putative (DUF616)	DUF616 Protein of unknown function (DUF616)
	Down		Cla023121	Chr11:17648786_17653890(-)	1.86171	4.69925	-1.3358	0.01223	0.0437342	Class E vacuolar protein-sorting machinery protein HSE1 (AHRD V1 *--- HSE1_USTMA); contains Interpro domain(s) IPR018205 VHS subgroup	AT4G32760	54.78	5e-152	AtTOL9	ENTH/VHS/GAT family protein;ENTH/VHS/GAT family protein;Target of Myb protein 1	VHS VHS domain; GAT GAT domain
	Up		Cla002639	Chr3:4044531_4046260(+)	5.52839	1.38112	2.00102	0.00156321	0.0190182	TPD1 (AHRD V1 **-- Q6TLJ2_ARATH)	AT4G24972	57.34	9e-50	AtTPD1	tapetum determinant 1;tapetum determinant protein;tapetum determinant protein	No hits detected that satisfy reporting thresholds
	Down		Cla004236	Chr5:9014480_9016942(-)	0.0680957	1.8967	-4.79978	0.00874012	0.0372173	Trehalose-6-phosphate phosphatase (AHRD V1 **** B2CZB6_ORYSI); contains Interpro domain(s) IPR003337 Trehalose-phosphatase	AT1G78090	55.98	4e-105	AtTPPB	trehalose-6-phosphate phosphatase;Haloacid dehalogenase-like hydrolase (HAD) superfamily protein;Haloacid dehalogenase-like hydrolase (HAD) superfamily protein	Trehalose_PPase Trehalose-phosphatase
	Up		Cla014155	Chr1:28687188_28689371(-)	16.3128	2.60606	2.64606	0.000202976	0.0123616	Trehalose-6-phosphate phosphatase (AHRD V1 **** Q9FJQ1_ARATH); contains Interpro domain(s) IPR003337 Trehalose-phosphatase	AT5G65140	70.38	5e-154	AtTPPJ	Haloacid dehalogenase-like hydrolase (HAD) superfamily protein;Haloacid dehalogenase-like hydrolase (HAD) superfamily protein;Haloacid dehalogenase-like hydrolase (HAD) superfamily protein	Trehalose_PPase Trehalose-phosphatase
	Up		Cla014481	Chr7:22999388_23001555(-)	22.4438	1.97402	3.5071	0.00111623	0.0174026	Trehalose-6-phosphate phosphatase (AHRD V1 **** Q9FJQ1_ARATH); contains Interpro domain(s) IPR003337 Trehalose-phosphatase	AT5G65140	67.93	9e-163	AtTPPJ	Haloacid dehalogenase-like hydrolase (HAD) superfamily protein;Haloacid dehalogenase-like hydrolase (HAD) superfamily protein;Haloacid dehalogenase-like hydrolase (HAD) superfamily protein	Trehalose_PPase Trehalose-phosphatase
	Down		Cla004094	Chr6:12633173_12635490(-)	228.83	553.135	-1.27336	0.000518051	0.0139787	AhpC/TSA-family protein (AHRD V1 **-- Q7WMQ6_BORBR); contains Interpro domain(s) IPR013740 Redoxin	AT1G65980	78.4	1e-94	AtTPX1	thioredoxin-dependent peroxidase 1;thioredoxin-dependent peroxidase 2;Thioredoxin superfamily protein	Redoxin Redoxin; AhpC-TSA AhpC/TSA family
	Up		Cla015830	Chr2:3971549_3972432(-)	7.29132	3.14352	1.2138	0.00916833	0.0378961	Ubiquitin-conjugating enzyme 8-like (AHRD V1 ***- Q38M69_SOLTU); contains Interpro domain(s) IPR000608 Ubiquitin-conjugating enzyme, E2	AT1G64230	95.27	8e-104	AtUBC28	ubiquitin-conjugating enzyme 28;ubiquitin-conjugating enzyme 28;ubiquitin conjugating enzyme 9	UQ_con Ubiquitin-conjugating enzyme
	Up		Cla011477	Chr1:2833871_2836015(+)	43.7981	16.4667	1.41132	0.000358959	0.0132951	UDP-glucose 4-epimerase (AHRD V1 ***- B0M3E8_PEA); contains Interpro domain(s) IPR005886 UDP-glucose 4-epimerase	AT1G12780	88.47	0	AtUGE1	UDP-D-glucose/UDP-D-galactose 4-epimerase 1;UDP-D-glucose/UDP-D-galactose 4-epimerase 3;UDP-D-glucose/UDP-D-galactose 4-epimerase 3	GDP_Man_Dehyd GDP-mannose 4,6 dehydratase; Epimerase NAD dependent epimerase/dehydratase family; Polysacc_synt_2 Polysaccharide biosynthesis protein; 3Beta_HSD 3-beta hydroxysteroid dehydrogenase/isomerase family; RmlD_sub_bind RmlD substrate binding domain; adh_short short chain dehydrogenase
	Up		Cla016682	Chr11:23715901_23721711(-)	29.226	14.598	1.00148	0.00154196	0.0189334	GDP-mannose transporter (AHRD V1 ***- F2QV00_PICP7); contains Interpro domain(s) IPR004853 Protein of unknown function DUF250	AT4G32272	63.64	4e-149	AtUGNT1	Nucleotide/sugar transporter family protein;Nucleotide/sugar transporter family protein;UDP-N-acetylglucosamine/UDP-glucose/GDP-mannose transporter	TPT Triose-phosphate Transporter family
	Down		Cla020245	Chr2:21690747_21692323(-)	0.295506	2.36987	-3.00355	0.0024185	0.0222354	UDP glycosyltransferase (AHRD V1 ***- C1JIE1_9SOLA); contains Interpro domain(s) IPR002213 UDP-glucuronosyl/UDP-glucosyltransferase	AT2G15490	42.63	6e-131	AtUGT73B4	UDP-glycosyltransferase 73B4;UDP-glycosyltransferase 73B4;UDP-glucosyl transferase 73B3	UDPGT UDP-glucoronosyl and UDP-glucosyl transferase
	Down		Cla004377	Chr9:27121146_27121865(-)	0.152102	4.53065	-4.8966	0.00303918	0.0238956	UDP-glycosyltransferase 74 F1 (AHRD V1 ***- F4IS54_ARATH); contains Interpro domain(s) IPR002213 UDP-glucuronosyl/UDP-glucosyltransferase	AT2G31750	52.3	7e-85	AtUGT74D1	UDP-glucosyl transferase 74D1;UDP-glucosyl transferase 74D1;Uridine diphosphate glycosyltransferase 74E2	UDPGT UDP-glucoronosyl and UDP-glucosyl transferase
	Down		Cla000422	Chr0:6592644_6594307(+)	0.240228	4.13312	-4.10476	0.000316796	0.0129433	UDP-glycosyltransferase 74 F1 (AHRD V1 ***- F4IS54_ARATH); contains Interpro domain(s) IPR002213 UDP-glucuronosyl/UDP-glucosyltransferase	AT1G05680	52.3	1e-126	AtUGT74E2	Uridine diphosphate glycosyltransferase 74E2;UDP-Glycosyltransferase superfamily protein;UDP-glucosyl transferase 74D1	UDPGT UDP-glucoronosyl and UDP-glucosyl transferase
	Down		Cla004376	Chr9:27127617_27128774(-)	0.156827	3.32267	-4.4051	5.77e-05	0.00976752	UDP-glucosyltransferase family 1 protein (AHRD V1 ***- C6KI44_CITSI); contains Interpro domain(s) IPR002213 UDP-glucuronosyl/UDP-glucosyltransferase	AT1G05680	38.57	5e-36	AtUGT74E2	Uridine diphosphate glycosyltransferase 74E2;UDP-glucosyltransferase 74F2;UDP-glycosyltransferase 74 F1	No hits detected that satisfy reporting thresholds
	Down		Cla022846	Chr11:14643516_14647252(+)	0.070369	5.43975	-6.27246	0.000801802	0.01573	UDP-glucosyltransferase (AHRD V1 ***- F8R891_9MAGN); contains Interpro domain(s) IPR002213 UDP-glucuronosyl/UDP-glucosyltransferase	AT5G17050	44.44	6e-122	AtUGT78D2	UDP-glucosyl transferase 78D2;UDP-Glycosyltransferase superfamily protein;UDP-glucosyl transferase 78D1	UDPGT UDP-glucoronosyl and UDP-glucosyl transferase
	Down	Down	Cla004288	Chr5:9534798_9538096(-)	2.26366	5.94649	-1.39338	0.00965187	0.0387463	UDP-glycosyltransferase 79B11 (AHRD V1 ***- U7B11_ARATH); contains Interpro domain(s) IPR002213 UDP-glucuronosyl/UDP-glucosyltransferase	AT5G54010	53.29	0	AtUGT79B6	UDP-Glycosyltransferase superfamily protein;UDP-Glycosyltransferase superfamily protein;UDP-Glycosyltransferase superfamily protein	UDPGT UDP-glucoronosyl and UDP-glucosyl transferase
	Down		Cla015631	Chr2:2197690_2199072(+)	2.45161	6.71061	-1.45271	0.00610856	0.0313145	UDP-glycosyltransferase 79B11 (AHRD V1 ***- U7B11_ARATH); contains Interpro domain(s) IPR002213 UDP-glucuronosyl/UDP-glucosyltransferase	AT5G54010	47.47	5e-148	AtUGT79B6	UDP-Glycosyltransferase superfamily protein;UDP-Glycosyltransferase superfamily protein;UDP-Glycosyltransferase superfamily protein	UDPGT UDP-glucoronosyl and UDP-glucosyl transferase
	Down		Cla016051	Chr2:6846070_6847551(-)	44.6819	107.807	-1.27068	0.000700578	0.0152975	UDP-glycosyltransferase 74 F1 (AHRD V1 ***- F4IS54_ARATH); contains Interpro domain(s) IPR002213 UDP-glucuronosyl/UDP-glucosyltransferase	AT4G15480	52.34	1e-176	AtUGT84A1	UDP-Glycosyltransferase superfamily protein;UDP-Glycosyltransferase superfamily protein;UDP-Glycosyltransferase superfamily protein	UDPGT UDP-glucoronosyl and UDP-glucosyl transferase
	Down		Cla020503	Chr5:29333225_29335460(+)	4.04373	18.9703	-2.22999	0.00133552	0.0183015	UDP glycosyltransferase (AHRD V1 ***- C1JIE1_9SOLA); contains Interpro domain(s) IPR002213 UDP-glucuronosyl/UDP-glucosyltransferase	AT5G49690	30.35	1e-59	AtUGT91C1	UDP-Glycosyltransferase superfamily protein;UDP-glucosyl transferase 73B3;UDP-Glycosyltransferase superfamily protein	UDPGT UDP-glucoronosyl and UDP-glucosyl transferase
	Down		Cla007575	Chr6:7703154_7704958(+)	1.54112	16.0394	-3.37956	9.22e-05	0.010233	Nodulin MtN21 family protein (AHRD V1 ***- D7LD58_ARALL); contains Interpro domain(s) IPR000620 Protein of unknown function DUF6, transmembrane	AT2G39510	38.6	4e-65	AtUMAMIT14	nodulin MtN21 /EamA-like transporter family protein;nodulin MtN21 /EamA-like transporter family protein;nodulin MtN21 /EamA-like transporter family protein	EamA EamA-like transporter family
	Down		Cla008462	Chr1:9016938_9019325(+)	3.83775	9.33075	-1.28173	0.00541332	0.0298654	Nodulin MtN21 family protein (AHRD V1 ***- D7MSI8_ARALL); contains Interpro domain(s) IPR000620 Protein of unknown function DUF6, transmembrane	AT5G64700	44.08	2e-88	AtUMAMIT21	nodulin MtN21 /EamA-like transporter family protein;nodulin MtN21 /EamA-like transporter family protein;nodulin MtN21 /EamA-like transporter family protein	EamA EamA-like transporter family
	Down		Cla004979	Chr1:1081676_1084372(-)	5.51753	11.2385	-1.02635	0.000926854	0.0163269	Nodulin MtN21 family protein (AHRD V1 ***- D7LP41_ARALL); contains Interpro domain(s) IPR000620 Protein of unknown function DUF6, transmembrane	AT3G30340	46.04	1e-110	AtUMAMIT32	nodulin MtN21 /EamA-like transporter family protein;nodulin MtN21 /EamA-like transporter family protein;nodulin MtN21 /EamA-like transporter family protein	EamA EamA-like transporter family
	Down		Cla017071	Chr10:20345979_20352725(+)	20.3199	42.2849	-1.05725	0.00356169	0.0255448	Nodulin MtN21 family protein (AHRD V1 ***- D7MJA5_ARALL); contains Interpro domain(s) IPR000620 Protein of unknown function DUF6, transmembrane	AT5G40230	48.06	7e-111	AtUMAMIT37	nodulin MtN21 /EamA-like transporter family protein;nodulin MtN21 /EamA-like transporter family protein;nodulin MtN21 /EamA-like transporter family protein	EamA EamA-like transporter family
	Up		Cla012087	Chr4:16763196_16767138(+)	76.5598	27.8225	1.46033	0.00331768	0.0247237	MtN21 nodulin protein-like (AHRD V1 ***- Q9FL41_ARATH); contains Interpro domain(s) IPR000620 Protein of unknown function DUF6, transmembrane	AT5G07050	60.21	2e-160	AtUMAMIT9	nodulin MtN21 /EamA-like transporter family protein;nodulin MtN21 /EamA-like transporter family protein;nodulin MtN21 /EamA-like transporter family protein	EamA EamA-like transporter family
	Up		Cla017347	Chr10:16972839_16973117(+)	8.24886	2.81347	1.55184	0.0031823	0.0242566	Unknown Protein (AHRD V1)	AT2G47270	34.52	5e-12	AtUPB1	transcription factor UPBEAT protein;ILI1 binding bHLH 1	No hits detected that satisfy reporting thresholds
	Up		Cla022865	Chr11:14973920_14974240(-)	12.3399	3.40326	1.85834	0.00219587	0.0214534	Unknown Protein (AHRD V1)	AT2G47270	38.46	3e-09	AtUPB1	transcription factor UPBEAT protein;phy rapidly regulated 2;transcription factor	No hits detected that satisfy reporting thresholds
	Down		Cla013838	Chr8:15993884_15995134(-)	0.153632	6.29373	-5.35637	0.00658071	0.0325343	Bidirectional sugar transporter N3 (AHRD V1 ***- NOD3_MEDTR); contains Interpro domain(s) IPR018179 RAG1-activating protein 1 homologue IPR004316 RAG1-activating protein-1-related	AT5G62850	56.77	1e-90	AtVEX1	Nodulin MtN3 family protein;Nodulin MtN3 family protein;Nodulin MtN3 family protein	MtN3_slv Sugar efflux transporter for intercellular exchange
	Down		Cla017085	Chr10:20177658_20178963(-)	0.113329	4.29339	-5.24352	0.0102537	0.0399218	Bidirectional sugar transporter N3 (AHRD V1 ***- NOD3_MEDTR); contains Interpro domain(s) IPR018179 RAG1-activating protein 1 homologue IPR004316 RAG1-activating protein-1-related	AT5G62850	57.14	8e-91	AtVEX1	Nodulin MtN3 family protein;Nodulin MtN3 family protein;Nodulin MtN3 family protein	MtN3_slv Sugar efflux transporter for intercellular exchange
	Up		Cla023024	Chr11:16584278_16585300(-)	22.8839	9.93925	1.20312	0.00365198	0.0257139	Unknown Protein (AHRD V1); contains Interpro domain(s) IPR008889 VQ	AT1G78310	52.86	3e-66	AtVQ9	VQ motif-containing protein;VQ motif-containing protein;VQ motif-containing protein	VQ VQ motif
	Up		Cla020157	Chr2:23022532_23024211(+)	2.74785	0.433191	2.66523	0.00503993	0.02899	B3 domain-containing protein Os01g0723500 (AHRD V1 ***- Y1235_ORYSJ); contains Interpro domain(s) IPR003340 Transcriptional factor B3	AT3G18990	28	9e-31	AtVRN1	AP2/B3-like transcriptional factor family protein;AP2/B3-like transcriptional factor family protein;AP2/B3-like transcriptional factor family protein	B3 B3 DNA binding domain
	Down		Cla020159	Chr2:22989291_22990568(-)	0.117781	8.77254	-6.21881	0.000125153	0.0106622	B3 domain-containing protein At4g01580 (AHRD V1 *-*- Y4158_ARATH); contains Interpro domain(s) IPR003340 Transcriptional factor B3	AT3G18990	29.1	2e-35	AtVRN1	AP2/B3-like transcriptional factor family protein;AP2/B3-like transcriptional factor family protein;AP2/B3-like transcriptional factor family protein	B3 B3 DNA binding domain
	Down		Cla020167	Chr2:22949568_22950862(+)	0.4546	7.77316	-4.09583	0.000795624	0.0156594	B3 domain-containing protein At1g49475 (AHRD V1 *-*- Y1475_ARATH); contains Interpro domain(s) IPR003340 Transcriptional factor B3	AT3G18990	29.21	7e-37	AtVRN1	AP2/B3-like transcriptional factor family protein;AP2/B3-like transcriptional factor family protein;AP2/B3-like transcriptional factor family protein	B3 B3 DNA binding domain
	Down		Cla016807	Chr11:25055250_25057910(+)	2.16431	4.87263	-1.17079	0.0015395	0.0189334	Acid phosphatase-like protein (AHRD V1 **-* Q9M0F5_ARATH); contains Interpro domain(s) IPR010028 Acid phosphatase, plant	AT4G29260	54.3	4e-91	AtVSP3	HAD superfamily%2C subfamily IIIB acid phosphatase;HAD superfamily%2C subfamily IIIB acid phosphatase;HAD superfamily%2C subfamily IIIB acid phosphatase	Acid_phosphat_B HAD superfamily, subfamily IIIB (Acid phosphatase)
	Down		Cla019453	Chr3:5388476_5388724(+)	0.842952	17.0728	-4.34011	0.00014562	0.0110761	Unknown Protein (AHRD V1)	AT4G28240	35.29	4e-07	AtWIP1	Wound-responsive family protein	DUF3774 Wound-induced protein
	Up		Cla001343	Chr1:31201402_31201632(+)	19.2819	4.96227	1.95817	0.00143781	0.0185299	Unknown Protein (AHRD V1)	AT4G05070	36.47	4e-08	AtWIP2	Wound-responsive family protein;Wound-responsive family protein;Wound-responsive family protein	DUF3774 Wound-induced protein
	Down		Cla001608	Chr2:7996672_7998106(+)	0.026594	8.26658	-8.28005	0.00161529	0.0191557	LIM domain protein (AHRD V1 **-- Q306K1_BRANA); contains Interpro domain(s) IPR001781 Zinc finger, LIM-type	AT1G10200	79.43	2e-99	AtWLIM1	GATA type zinc finger transcription factor family protein;GATA type zinc finger transcription factor family protein;GATA type zinc finger transcription factor family protein	LIM LIM domain
	Up		Cla009235	Chr6:4823071_4824445(-)	6.54152	2.60648	1.32752	0.0142324	0.0472779	WRKY transcription factor 31 (AHRD V1 *-** C9DI20_9ROSI); contains Interpro domain(s) IPR003657 DNA-binding WRKY	AT2G47260	50	4e-51	AtWRKY23	WRKY DNA-binding protein 23;WRKY DNA-binding protein 48;WRKY DNA-binding protein 57	WRKY WRKY DNA -binding domain
	Up		Cla017345	Chr10:17001468_17004493(+)	5.22782	2.21819	1.23682	0.000648218	0.0149832	WRKY transcription factor (AHRD V1 **** A0MVX6_POPCN); contains Interpro domain(s) IPR003657 DNA-binding WRKY	AT2G47260	39.45	2e-57	AtWRKY23	WRKY DNA-binding protein 23;WRKY family transcription factor;WRKY DNA-binding protein 71	WRKY WRKY DNA -binding domain
	Up		Cla018026	Chr10:28064812_28067485(+)	13.2373	4.82205	1.45689	0.000750051	0.0155109	WRKY transcription factor 17 (AHRD V1 **** C9DI06_9ROSI); contains Interpro domain(s) IPR003657 DNA-binding WRKY	AT2G38470	49.19	4e-118	AtWRKY33	WRKY DNA-binding protein 33;WRKY DNA-binding protein 26;WRKY DNA-binding protein 26	WRKY WRKY DNA -binding domain
	Down		Cla021203	Chr5:1196965_1198094(-)	0.478127	3.89247	-3.02522	0.00357858	0.0255742	WRKY transcription factor (Fragment) (AHRD V1 *-** F1DK13_MAIZE); contains Interpro domain(s) IPR003657 DNA-binding WRKY	AT1G64000	59.52	2e-12	AtWRKY56	WRKY DNA-binding protein 56;WRKY DNA-binding protein 24;WRKY DNA-binding protein 43	WRKY WRKY DNA -binding domain
	Down		Cla014280	Chr1:29651314_29653462(+)	3.77078	9.25382	-1.29519	0.0117932	0.0429186	WUSCHEL-related homeobox-containing protein 4 (AHRD V1 *-*- C0LAL8_9MAGN); contains Interpro domain(s) IPR001356 Homeobox	AT2G17950	40.14	6e-48	AtWUS	Homeodomain-like superfamily protein;WUSCHEL related homeobox 2	Homeodomain Homeodomain
	Up		Cla015704	Chr2:2760219_2760683(-)	51.026	25.4564	1.0032	0.00229263	0.0218048	RING-H2 finger protein (AHRD V1 **-- Q30D22_PONTR); contains Interpro domain(s) IPR018957 Zinc finger, C3HC4 RING-type	AT2G04240	56.21	1e-43	AtXERICO	RING/U-box superfamily protein;RING/U-box superfamily protein;RING/U-box superfamily protein	zf-RING_2 Ring finger domain; zf-RING_11 RING-like zinc finger; zf-rbx1 RING-H2 zinc finger domain; zf-C3HC4_2 Zinc finger, C3HC4 type (RING finger); zf-RING_5 zinc-RING finger domain; zf-C3HC4 Zinc finger, C3HC4 type (RING finger); zf-C3HC4_3 Zinc finger, C3HC4 type (RING finger); Prok-RING_4 Prokaryotic RING finger family 4; zf-RING_UBOX RING-type zinc-finger
	Up		Cla014571	Chr7:21000968_21001285(+)	6.69464	0.920825	2.86201	0.00519147	0.029334	Unknown Protein (AHRD V1); contains Interpro domain(s) IPR000167 Dehydrin	AT3G50980	34.38	1e-07	AtXERO1	dehydrin xero 1	Dehydrin Dehydrin
	Down	Down	Cla001251	Chr2:7756189_7763518(-)	8.4009	21.18	-1.33409	0.000574923	0.0144066	Squalene monooxygenase (AHRD V1 ***- Q506K3_DATIN); contains Interpro domain(s) IPR013698 Squalene epoxidase	AT1G58440	73.02	0	AtXF1	FAD/NAD(P)-binding oxidoreductase family protein;squalene epoxidase 3;squalene epoxidase 2	SE Squalene epoxidase; FAD_binding_3 FAD binding domain; DAO FAD dependent oxidoreductase; FAD_binding_2 FAD binding domain; GIDA Glucose inhibited division protein A
	Up		Cla023088	Chr11:17326766_17330403(+)	21.4784	9.25822	1.21408	0.00954705	0.0385135	Receptor kinase (AHRD V1 **** D9IAP8_GOSHI); contains Interpro domain(s) IPR002290 Serine/threonine protein kinase	AT1G09970	60.8	0	AtXI-23	Leucine-rich receptor-like protein kinase family protein;Leucine-rich receptor-like protein kinase family protein;Leucine-rich repeat protein kinase family protein	Pkinase Protein kinase domain; Pkinase_Tyr Protein tyrosine kinase; LRR_8 Leucine rich repeat; LRR_4 Leucine Rich repeats (2 copies); LRR_1 Leucine Rich Repeat; LRRNT_2 Leucine rich repeat N-terminal domain
	Down		Cla007500	Chr7:16621328_16622697(-)	14.3016	28.9594	-1.01785	0.00252253	0.0224978	Xyloglucan endotransglucosylase/hydrolase 10 (AHRD V1 ***- C0IRI3_MALDO); contains Interpro domain(s) IPR000757 Glycoside hydrolase, family 16	AT1G14720	67.26	5e-117	AtXTH28	xyloglucan endotransglucosylase/hydrolase 28;endoxyloglucan transferase A3;xyloglucan endotransglucosylase/hydrolase 30	Glyco_hydro_16 Glycosyl hydrolases family 16; XET_C Xyloglucan endo-transglycosylase (XET) C-terminus
	Up		Cla008706	Chr2:31719581_31720869(+)	5.57412	1.97618	1.49603	0.00466801	0.0281295	Xyloglucan endotransglucosylase/hydrolase 9 (AHRD V1 ***- C0IRI2_MALDO); contains Interpro domain(s) IPR016455 Xyloglucan endotransglucosylase/hydrolase	AT2G36870	57.86	1e-112	AtXTH32	xyloglucan endotransglucosylase/hydrolase 32;xyloglucan endo-transglycosylase-related 8;xyloglucan endotransglucosylase/hydrolase 32	Glyco_hydro_16 Glycosyl hydrolases family 16; XET_C Xyloglucan endo-transglycosylase (XET) C-terminus
	Down		Cla017040	Chr10:20658412_20660451(-)	0.90314	4.13128	-2.19357	0.0107365	0.0407916	Yellow stripe-like transporter 12 (AHRD V1 ***- E3UJZ2_MAIZE); contains Interpro domain(s) IPR004813 Oligopeptide transporter OPT superfamily	AT1G65730	63.39	0	AtYSL7	YELLOW STRIPE like 7;YELLOW STRIPE like 5;YELLOW STRIPE like 5	OPT OPT oligopeptide transporter protein
	Down		Cla021089	Chr5:340433_341563(-)	1.07813	5.85273	-2.44058	0.00115807	0.0175763	Zinc finger family protein (AHRD V1 ***- D7LRS3_ARALL); contains Interpro domain(s) IPR007087 Zinc finger, C2H2-type	AT3G60580	40.44	2e-59	AtZAT9	C2H2-like zinc finger protein;C2H2-like zinc finger protein;C2H2-like zinc finger protein	zf-C2H2_6 C2H2-type zinc finger; zf-C2H2_jaz Zinc-finger double-stranded RNA-binding; zf-C2H2_4 C2H2-type zinc finger
	Up		Cla015120	Chr9:4194839_4195348(-)	9.70769	3.233	1.58625	0.00564272	0.0302744	Zinc finger protein 6 (AHRD V1 *-*- B6T066_MAIZE); contains Interpro domain(s) IPR007087 Zinc finger, C2H2-type	AT1G67030	34.18	2e-15	AtZFP6	zinc finger protein 6;C2H2 and C2HC zinc fingers superfamily protein;zinc finger protein 7	No hits detected that satisfy reporting thresholds
	Down		Cla003299	Chr9:33164398_33168252(-)	7.35302	41.0732	-2.48179	0.00181328	0.0200471	Zinc transporter 2 (AHRD V1 ***- B6UH65_MAIZE); contains Interpro domain(s) IPR003689 Zinc/iron permease	AT1G55910	64.17	1e-137	AtZIP11	zinc transporter 11 precursor;ZRT/IRT-like protein 2;iron regulated transporter 2	Zip ZIP Zinc transporter
	Up		Cla022183	Chr8:21313143_21313856(+)	5.6548	2.78298	1.02285	0.000679629	0.0151856	BZIP transcription factor (AHRD V1 ***- Q6IVC2_ORYSJ)	AT1G58330	43.04	2e-53	AtZW2	transcription factor-like protein;RESPONSE TO ABA AND SALT 1;transcription factor-like protein	DOG1 Seed dormancy control
	Up		Cla023124	Chr11:17667533_17674194(+)	5.22719	2.41306	1.11517	0.000927434	0.0163269	Synaptonemal complex protein 1 (AHRD V1 ***- SYCP1_ARATH)	AT1G22260	50.34	0	AtZYP1a	Myosin heavy chain-related protein;Myosin heavy chain-related protein;Myosin heavy chain-related protein	No hits detected that satisfy reporting thresholds
	Up		Cla017363	Chr10:16768773_16772898(+)	14.3472	4.08447	1.81255	0.0045585	0.0279973	Zinc finger family protein (AHRD V1 **-* D7LR15_ARALL); contains Interpro domain(s) IPR018957 Zinc finger, C3HC4 RING-type	AT1G02610	42.57	1e-47	NA	RING/FYVE/PHD zinc finger superfamily protein;RING/FYVE/PHD zinc finger superfamily protein;RING/FYVE/PHD zinc finger superfamily protein	DUF3675 Protein of unknown function (DUF3675)
	Down	Down	Cla012321	Chr6:18322313_18323686(+)	2.48601	44.6066	-4.16535	0.0118824	0.0430817	Hydroxycinnamoyl CoA quinate transferase (AHRD V1 **-* D6BK25_CYNSC); contains Interpro domain(s) IPR003480 Transferase	AT1G03390	64.11	0	NA	HXXXD-type acyl-transferase family protein;HXXXD-type acyl-transferase family protein;HXXXD-type acyl-transferase family protein	Transferase Transferase family
	Down	Down	Cla016164	Chr9:12717450_12725093(+)	0.523147	56.4842	-6.75449	5.66e-05	0.00976752	Cytochrome P450 (Fragment) (AHRD V1 **-- B9HPE8_POPTR); contains Interpro domain(s) IPR001128 Cytochrome P450	AT1G05160	48.76	7e-156	NA	cytochrome P450%2C family 88%2C subfamily A%2C polypeptide 3;cytochrome P450%2C family 88%2C subfamily A%2C polypeptide 3;ent-kaurenoic acid hydroxylase 2	p450 Cytochrome P450
	Up		Cla021351	Chr5:2412254_2418925(-)	6.66518	2.63672	1.3379	0.00208546	0.0210725	Cytochrome P450 (Fragment) (AHRD V1 **-- B9HPE8_POPTR); contains Interpro domain(s) IPR001128 Cytochrome P450	AT1G05160	67.31	0	NA	cytochrome P450%2C family 88%2C subfamily A%2C polypeptide 3;cytochrome P450%2C family 88%2C subfamily A%2C polypeptide 3;ent-kaurenoic acid hydroxylase 2	p450 Cytochrome P450
	Down		Cla019377	Chr3:4695317_4698489(-)	2.23957	5.12739	-1.195	0.00472018	0.0281925	Beta-1 3-galactosyltransferase 6 (AHRD V1 **-- B6UBH3_MAIZE); contains Interpro domain(s) IPR002659 Glycosyl transferase, family 31	AT1G05170	62.16	5e-173	NA	Galactosyltransferase family protein;Galactosyltransferase family protein;Galactosyltransferase family protein	Galactosyl_T Galactosyltransferase
	Down		Cla014531	Chr7:21995114_21995764(-)	1.59052	4.06331	-1.35315	0.014535	0.0477787	Unknown Protein (AHRD V1)	AT1G05210	50.32	9e-50	NA	Transmembrane protein 97%2C Putative;Transmembrane protein 97%2C Putative;Transmembrane protein 97%2C Putative	DUF2781 Protein of unknown function (DUF2781)
	Down	Down	Cla005947	Chr7:1613731_1617285(+)	8.77842	18.8784	-1.1047	0.011139	0.0416641	Homeobox-leucine zipper protein HDG2 (AHRD V1 ***- B3H6Y4_ARATH)	AT1G05230	24.32	9e-18	NA	homeodomain GLABROUS 2;homeodomain GLABROUS 2;homeodomain GLABROUS 2	START START domain
	Down		Cla022493	Chr8:24121478_24122029(+)	1.28177	7.72699	-2.59177	0.00130607	0.0182864	B3 domain-containing protein At1g05920 (AHRD V1 ***- Y1592_ARATH)	AT1G05920	33.09	3e-12	NA	B3 domain protein (DUF313);B3 domain protein (DUF313);B3 domain protein (DUF313)	DUF313 Domain of unknown function (DUF313)
	Down		Cla003924	Chr1:6404802_6405515(-)	0.333071	8.26544	-4.63319	0.00703862	0.0334605	B3 domain-containing protein At2g31420 (AHRD V1 *-*- Y2142_ARATH); contains Interpro domain(s) IPR005508 Protein of unknown function DUF313	AT1G05930	24.89	5e-13	NA	B3 domain protein (DUF313);B3 domain protein (DUF313);B3 domain protein (DUF313)	DUF313 Domain of unknown function (DUF313)
	Down	Down	Cla010439	Chr2:10376889_10377998(+)	0.136449	53.3175	-8.6101	0.00115387	0.017567	Cathepsin B-like cysteine proteinase 1 (AHRD V1 **-* CYSP1_OSTOS); contains Interpro domain(s) IPR013128 Peptidase C1A, papain	AT1G06260	56.17	1e-121	NA	Cysteine proteinases superfamily protein;senescence-associated gene 12;Cysteine proteinases superfamily protein	Peptidase_C1 Papain family cysteine protease; Inhibitor_I29 Cathepsin propeptide inhibitor domain (I29); Peptidase_C1_2 Peptidase C1-like family
	Down		Cla023246	Chr11:18908166_18911713(+)	29.4399	80.5673	-1.45242	0.00213391	0.0212153	Aldo/keto reductase family protein (AHRD V1 ***- D7KG57_ARALL); contains Interpro domain(s) IPR001395 Aldo/keto reductase	AT1G06690	77.87	0	NA	NAD(P)-linked oxidoreductase superfamily protein;NAD(P)-linked oxidoreductase superfamily protein;NAD(P)-linked oxidoreductase superfamily protein	Aldo_ket_red Aldo/keto reductase family
	Down		Cla004361	Chr7:5089792_5091712(+)	1.63317	8.8691	-2.44112	0.00113414	0.0174987	Catalytic/ protein phosphatase type 2C/ protein serine/threonine phosphatase (AHRD V1 **** B6TEB8_MAIZE); contains Interpro domain(s) IPR015655 Protein phosphatase 2C	AT1G07160	53.68	4e-119	NA	Protein phosphatase 2C family protein;Protein phosphatase 2C family protein;phosphatase 2C5	PP2C Protein phosphatase 2C; PP2C_2 Protein phosphatase 2C
	Down		Cla013266	Chr2:30843333_30845545(-)	3.19549	14.3231	-2.16424	0.000879018	0.0161604	Ankyrin repeat family protein (AHRD V1 **-- Q9LVG7_ARATH); contains Interpro domain(s) IPR000086 NUDIX hydrolase domain	AT1G07710	76.72	0	NA	Ankyrin repeat family protein;Ankyrin repeat family protein;ankyrin repeat family protein	Ank_2 Ankyrin repeats (3 copies); Ank_4 Ankyrin repeats (many copies); Ank_5 Ankyrin repeats (many copies); Ank_3 Ankyrin repeat; Ank Ankyrin repeat; PGG Domain of unknown function
	Up		Cla017271	Chr10:17968963_17970760(+)	42.9449	17.5713	1.28926	0.00294458	0.0237667	Unknown Protein (AHRD V1)	AT1G07985	55.45	7e-17	NA	Expressed protein	No hits detected that satisfy reporting thresholds
	Down		Cla011302	Chr3:27422559_27424646(-)	10.8309	21.9926	-1.02187	0.0135559	0.0461295	Vesicle-associated protein (AHRD V1 ***- A8W459_MEDTR); contains Interpro domain(s) IPR000535 Major sperm protein	AT1G08820	45.98	1e-15	NA	vamp/synaptobrevin-associated protein 27-2;vamp/synaptobrevin-associated protein 27-2;vamp/synaptobrevin-associated protein 27-2	No hits detected that satisfy reporting thresholds
	Down	Down	Cla001895	Chr11:26766415_26768920(+)	13.8721	58.8541	-2.08495	0.000787621	0.0156308	Short-chain dehydrogenase/reductase SDR (AHRD V1 **-- D4ZWM2_SPIPL); contains Interpro domain(s) IPR002198 Short-chain dehydrogenase/reductase SDR	AT1G10310	56.65	9e-85	NA	NAD(P)-binding Rossmann-fold superfamily protein;NAD(P)-binding Rossmann-fold superfamily protein;NAD(P)-binding Rossmann-fold superfamily protein	adh_short short chain dehydrogenase; adh_short_C2 Enoyl-(Acyl carrier protein) reductase; KR KR domain; DUF1776 Fungal family of unknown function (DUF1776); Epimerase NAD dependent epimerase/dehydratase family
	Down		Cla021899	Chr8:18331075_18334692(+)	1.42235	5.54197	-1.96212	0.000540916	0.0140675	AT1G10385-like protein (Fragment) (AHRD V1 *-*- D6PN92_9BRAS); contains Interpro domain(s) IPR014812 Vps51/Vps67	AT1G10385	63.91	0	NA	Vps51/Vps67 family (components of vesicular transport) protein;exocyst complex component 84B;exocyst complex component 84B	Exo84_C Exocyst component 84 C-terminal; Vps51 Vps51/Vps67
	Down		Cla003470	Chr9:27745050_27747784(+)	1.44355	12.6447	-3.13084	3.72e-05	0.00976752	Chaperone protein dnaJ 3 (AHRD V1 *-*- DNAJ3_ARATH); contains Interpro domain(s) IPR015609 Molecular chaperone, heat shock protein, Hsp40, DnaJ	AT1G11040	59.36	1e-90	NA	HSP40/DnaJ peptide-binding protein;HSP40/DnaJ peptide-binding protein;DNAJ heat shock family protein	DnaJ_C DnaJ C terminal domain
	Down		Cla019387	Chr3:4779932_4780273(-)	3.7835	29.3178	-2.95398	0.000266073	0.012665	Unknown Protein (AHRD V1)	AT1G11655	36.89	6e-15	NA	hypothetical protein;hypothetical protein;hypothetical protein	No hits detected that satisfy reporting thresholds
	Down		Cla004587	Chr1:24828942_24833980(+)	8.76919	21.3127	-1.2812	0.0115143	0.042466	Diphosphate/fructose-6-phosphate 1-phosphotransferase (AHRD V1 ***- F4LKH0_TREBD); contains Interpro domain(s) IPR011183 Pyrophosphate-dependent phosphofructokinase PfpB	AT1G12000	74.19	0	NA	Phosphofructokinase family protein;Phosphofructokinase family protein;Phosphofructokinase family protein	PFK Phosphofructokinase
	Down	Down	Cla011495	Chr1:3028123_3034065(+)	1.49248	180.855	-6.92098	9.95e-05	0.0103379	Choline dehydrogenase (AHRD V1 ***- B8R949_9BACT); contains Interpro domain(s) IPR012132 Glucose-methanol-choline oxidoreductase	AT1G12570	62.13	0	NA	Glucose-methanol-choline (GMC) oxidoreductase family protein;Glucose-methanol-choline (GMC) oxidoreductase family protein;Glucose-methanol-choline (GMC) oxidoreductase family protein	GMC_oxred_N GMC oxidoreductase; GMC_oxred_C GMC oxidoreductase
	Up		Cla018508	Chr4:22783462_22784136(+)	24.6485	9.19036	1.4233	0.00107346	0.0170823	Unknown Protein (AHRD V1)	AT1G13360	34.08	9e-11	NA	hypothetical protein;hypothetical protein;hypothetical protein	No hits detected that satisfy reporting thresholds
	Down		Cla020389	Chr5:30249479_30250015(+)	41.0554	85.7398	-1.06239	0.00158309	0.0191037	Unknown Protein (AHRD V1)	AT1G13360	48.4	3e-44	NA	hypothetical protein;hypothetical protein;hypothetical protein	No hits detected that satisfy reporting thresholds
	Up		Cla010171	Chr5:31488420_31489727(-)	34.5494	16.4752	1.06836	0.00515997	0.0292594	Kelch-like protein 10 (AHRD V1 *-*- F1KXB8_ASCSU); contains Interpro domain(s) IPR015915 Kelch-type beta propeller	AT1G14330	65.47	0	NA	Galactose oxidase/kelch repeat superfamily protein;Galactose oxidase/kelch repeat superfamily protein;Galactose oxidase/kelch repeat superfamily protein	Kelch_1 Kelch motif; Kelch_6 Kelch motif; Kelch_4 Galactose oxidase, central domain; Kelch_3 Galactose oxidase, central domain
	Down		Cla010637	Chr6:11981027_11981608(-)	0.644426	6.47111	-3.32793	0.000916394	0.0162987	Unknown Protein (AHRD V1)	AT1G15260	39.56	4e-15	NA	LOW protein: ATP-dependent RNA helicase-like protein;hypothetical protein;LOW protein: ATP-dependent RNA helicase-like protein	No hits detected that satisfy reporting thresholds
	Down		Cla016704	Chr11:24015768_24017180(+)	2.67273	5.66541	-1.08387	0.0121057	0.043477	Ethylene-responsive transcription factor 10 (AHRD V1 *-** ERF77_ARATH); contains Interpro domain(s) IPR001471 Pathogenesis-related transcriptional factor and ERF, DNA-binding	AT1G15360	54.78	3e-69	NA	Integrase-type DNA-binding superfamily protein;Integrase-type DNA-binding superfamily protein;Integrase-type DNA-binding superfamily protein	AP2 AP2 domain
	Down		Cla013453	Chr2:29244818_29246663(+)	0.635037	7.09827	-3.48256	0.00431521	0.0274055	Cation diffusion facilitator 11 (AHRD V1 **-- Q84ND3_STYHA); contains Interpro domain(s) IPR002524 Cation efflux protein	AT1G16310	64.8	0	NA	Cation efflux family protein;Cation efflux family protein;Cation efflux family protein	Cation_efflux Cation efflux family; ZT_dimer Dimerisation domain of Zinc Transporter
	Down		Cla004852	Chr10:11835234_11836695(-)	2.545	13.0043	-2.35325	0.0059696	0.0310042	DUF895 domain membrane protein (AHRD V1 ***- B0YA53_ASPFC); contains Interpro domain(s) IPR016196 Major facilitator superfamily, general substrate transporter	AT1G18010	72.54	0	NA	Major facilitator superfamily protein;Major facilitator superfamily protein	UNC-93 Ion channel regulatory protein UNC-93; MFS_1 Major Facilitator Superfamily
	Up		Cla018929	Chr6:23597092_23597652(+)	63.7141	24.9203	1.35429	0.0118739	0.0430817	Calmodulin (AHRD V1 ***- B6U186_MAIZE); contains Interpro domain(s) IPR011992 EF-Hand type	AT1G18210	60.78	1e-62	NA	Calcium-binding EF-hand family protein;Calcium-binding EF-hand family protein;EF hand calcium-binding protein family	EF-hand_1 EF hand; EF-hand_7 EF-hand domain pair; EF-hand_6 EF-hand domain; EF-hand_5 EF hand; EF-hand_8 EF-hand domain pair; EF-hand_9 EF-hand domain; SPARC_Ca_bdg Secreted protein acidic and rich in cysteine Ca binding region
	Down		Cla020681	Chr5:27761842_27762135(-)	5.30695	13.4666	-1.34344	0.00106985	0.0170776	Calcium-binding protein (AHRD V1 **-* Q2KN25_AMBAR); contains Interpro domain(s) IPR011992 EF-Hand type	AT1G18210	35.48	4e-10	NA	Calcium-binding EF-hand family protein;Calcium-binding EF-hand family protein;calmodulin-like 41	EF-hand_6 EF-hand domain; EF-hand_1 EF hand; EF-hand_5 EF hand; EF-hand_7 EF-hand domain pair; EF-hand_8 EF-hand domain pair
	Up		Cla000753	Chr0:18569741_18574883(+)	25.6755	10.2778	1.32085	0.00781777	0.0353624	2-oxoisovalerate dehydrogenase alpha subunit (AHRD V1 ***- E1FN61_LOALO); contains Interpro domain(s) IPR001017 Dehydrogenase, E1 component	AT1G21400	77.01	0	NA	Thiamin diphosphate-binding fold (THDP-binding) superfamily protein;Thiamin diphosphate-binding fold (THDP-binding) superfamily protein;Thiamin diphosphate-binding fold (THDP-binding) superfamily protein	E1_dh Dehydrogenase E1 component
	Down		Cla011701	Chr7:11904064_11904447(-)	0.592446	2.75973	-2.21977	0.00176425	0.0198865	Unknown Protein (AHRD V1)	AT1G23040	45.9	6e-11	NA	hydroxyproline-rich glycoprotein family protein;hydroxyproline-rich glycoprotein family protein;hydroxyproline-rich glycoprotein family protein	No hits detected that satisfy reporting thresholds
	Up		Cla010063	Chr5:32371178_32371669(+)	24.6187	4.95884	2.31168	0.00928204	0.0380935	Invertase/pectin methylesterase inhibitor family protein (AHRD V1 ***- D7KNF0_ARALL); contains Interpro domain(s) IPR006501 Pectinesterase inhibitor	AT1G23350	32.32	6e-19	NA	Plant invertase/pectin methylesterase inhibitor superfamily protein;Plant invertase/pectin methylesterase inhibitor superfamily protein;Plant invertase/pectin methylesterase inhibitor superfamily protein	PMEI Plant invertase/pectin methylesterase inhibitor
	Down		Cla010064	Chr5:32368423_32368905(+)	17.4374	153.456	-3.13756	0.0013258	0.0182864	Invertase/pectin methylesterase inhibitor family protein (AHRD V1 ***- D7KNF0_ARALL); contains Interpro domain(s) IPR006501 Pectinesterase inhibitor	AT1G23350	37.82	1e-26	NA	Plant invertase/pectin methylesterase inhibitor superfamily protein;Plant invertase/pectin methylesterase inhibitor superfamily protein;Plant invertase/pectin methylesterase inhibitor superfamily protein	PMEI Plant invertase/pectin methylesterase inhibitor
	Up		Cla010012	Chr5:32802474_32803814(-)	6.57342	3.20202	1.03766	0.00248371	0.02238	WD repeat-containing protein 48 homolog (AHRD V1 *--- WDR48_DROVI); contains Interpro domain(s) IPR017986 WD40 repeat, region	AT1G24530	64.48	2e-164	NA	Transducin/WD40 repeat-like superfamily protein;Transducin/WD40 repeat-like superfamily protein;Transducin/WD40 repeat-like superfamily protein	WD40 WD domain, G-beta repeat; PQQ_3 PQQ-like domain
	Down		Cla001468	Chr7:14490073_14491266(+)	3.8059	9.70968	-1.35119	0.00288067	0.023678	Zinc finger protein 91 (AHRD V1 *-*- F4WBR1_ACREC); contains Interpro domain(s) IPR007087 Zinc finger, C2H2-type	AT1G26610	29.68	5e-13	NA	C2H2-like zinc finger protein;C2H2-like zinc finger protein	zf-C2H2_6 C2H2-type zinc finger; zf-C2H2_4 C2H2-type zinc finger; zf-C2H2_jaz Zinc-finger double-stranded RNA-binding; zf-C2H2 Zinc finger, C2H2 type; zf-met Zinc-finger of C2H2 type
	Up		Cla010230	Chr5:31070676_31072028(+)	4.69321	1.45254	1.692	0.00895579	0.0376994	Zinc finger family protein (AHRD V1 *-*- D7LRS3_ARALL); contains Interpro domain(s) IPR007087 Zinc finger, C2H2-type	AT1G26610	31.38	2e-44	NA	C2H2-like zinc finger protein;C2H2-like zinc finger protein	zf-C2H2_6 C2H2-type zinc finger; zf-C2H2_4 C2H2-type zinc finger
	Down		Cla019075	Chr6:24856568_24858046(+)	2.49173	12.1658	-2.28762	0.000345037	0.013137	Zinc finger family protein (AHRD V1 *-*- D7LRS3_ARALL); contains Interpro domain(s) IPR007087 Zinc finger, C2H2-type	AT1G26610	32.8	6e-49	NA	C2H2-like zinc finger protein;C2H2-like zinc finger protein;C2H2-like zinc finger protein	zf-C2H2_6 C2H2-type zinc finger; zf-C2H2_4 C2H2-type zinc finger; zf-C2H2_jaz Zinc-finger double-stranded RNA-binding; zf-met Zinc-finger of C2H2 type; zf-C2H2_2 C2H2 type zinc-finger (2 copies); zf-C2H2 Zinc finger, C2H2 type
	Up		Cla010893	Chr7:30868748_30869194(-)	22.7144	10.4308	1.12276	0.00137431	0.0184305	Unknown Protein (AHRD V1)	AT1G27290	56.59	3e-42	NA	transmembrane protein;transmembrane protein	No hits detected that satisfy reporting thresholds
	Up		Cla001510	Chr6:2047006_2048410(+)	6.73665	0.884605	2.92893	0.00372023	0.0258755	DM280 protein (AHRD V1 **-- B8PWQ3_ORYSI)	AT1G27990	57.71	2e-91	NA	transmembrane protein;transmembrane protein;transmembrane protein	No hits detected that satisfy reporting thresholds
	Down		Cla009680	Chr1:32048726_32049866(+)	0.492463	2.54958	-2.37217	0.00140858	0.0184994	GDSL esterase/lipase (AHRD V1 ***- F4HY89_ARATH); contains Interpro domain(s) IPR001087 Lipase, GDSL	AT1G28610	47.02	2e-44	NA	GDSL-like Lipase/Acylhydrolase superfamily protein;GDSL-like Lipase/Acylhydrolase superfamily protein;GDSL-like Lipase/Acylhydrolase superfamily protein	No hits detected that satisfy reporting thresholds
	Down		Cla002347	Chr1:4447137_4447709(-)	1.41887	9.64531	-2.76508	0.00457797	0.0280081	Pollen allergen Phl p 11 (AHRD V1 ***- B6T2Z8_MAIZE); contains Interpro domain(s) IPR006041 Pollen Ole e 1 allergen and extensin	AT1G29140	49.39	5e-50	NA	Pollen Ole e 1 allergen and extensin family protein;Pollen Ole e 1 allergen and extensin family protein;Pollen Ole e 1 allergen and extensin family protein	Pollen_Ole_e_I Pollen proteins Ole e I like
	Down		Cla009690	Chr1:32106509_32107107(+)	0.215844	8.24157	-5.25486	0.000416948	0.013507	Pollen allergen Phl p 11 (AHRD V1 ***- B6T2Z8_MAIZE); contains Interpro domain(s) IPR006041 Pollen Ole e 1 allergen and extensin	AT1G29140	49.09	3e-48	NA	Pollen Ole e 1 allergen and extensin family protein;Pollen Ole e 1 allergen and extensin family protein;Pollen Ole e 1 allergen and extensin family protein	Pollen_Ole_e_I Pollen proteins Ole e I like
	Down		Cla011142	Chr3:25690214_25690793(+)	0.266807	8.27976	-4.95572	0.00201653	0.0208411	Pollen allergen Phl p 11 (AHRD V1 ***- B6TNI5_MAIZE); contains Interpro domain(s) IPR006041 Pollen Ole e 1 allergen and extensin	AT1G29140	52.44	2e-50	NA	Pollen Ole e 1 allergen and extensin family protein;Pollen Ole e 1 allergen and extensin family protein;Pollen Ole e 1 allergen and extensin family protein	Pollen_Ole_e_I Pollen proteins Ole e I like
	Down		Cla009695	Chr1:32142425_32142925(-)	3.08258	6.23537	-1.01634	0.0152833	0.0491429	Unknown Protein (AHRD V1)	AT1G29195	57.51	1e-63	NA	phosphatidylinositol 4-phosphate 5-kinase MSS4-like protein;6%2C7-dimethyl-8-ribityllumazine synthase;6%2C7-dimethyl-8-ribityllumazine synthase	DUF4228 Domain of unknown function (DUF4228)
	Down		Cla009706	Chr1:32247360_32247910(+)	1.9404	5.18806	-1.41884	0.0135499	0.0461295	At1g29270 (Fragment) (AHRD V1 ***- C0SUY1_ARATH)	AT1G29270	47.5	8e-28	NA	transcription factor bHLH35-like protein;transcription factor bHLH35-like protein;transcription factor SCREAM-like protein	No hits detected that satisfy reporting thresholds
	Down		Cla009818	Chr1:33197991_33215677(+)	14.4298	29.775	-1.04504	0.000906378	0.0162705	Multidrug resistance protein ABC transporter family (AHRD V1 **-- B9I191_POPTR); contains Interpro domain(s) IPR001140 ABC transporter, transmembrane region	AT1G30410	69.95	0	NA	multidrug resistance-associated protein 13;multidrug resistance-associated protein 13;multidrug resistance-associated protein 13	ABC_membrane ABC transporter transmembrane region; ABC_tran ABC transporter; SMC_N RecF/RecN/SMC N terminal domain
	Down		Cla009830	Chr1:33336728_33340294(+)	21.4615	68.6687	-1.6779	0.000135217	0.0107871	O-succinylbenzoate--CoA ligase (AHRD V1 ***- F4D041_9PSEU); contains Interpro domain(s) IPR000873 AMP-dependent synthetase and ligase	AT1G30520	56.27	2e-107	NA	acyl-activating enzyme 14;acyl-activating enzyme 14;acyl-activating enzyme 14	AMP-binding AMP-binding enzyme
	Down		Cla002453	Chr8:9528998_9529657(-)	1.30961	3.38414	-1.36965	0.00407722	0.0267535	Unknown Protein (AHRD V1)	AT1G31130	36.82	4e-24	NA	polyadenylate-binding protein 1-B-binding protein;polyadenylate-binding protein 1-B-binding protein;polyadenylate-binding protein 1-B-binding protein	No hits detected that satisfy reporting thresholds
	Up		Cla016338	Chr9:9777225_9782185(-)	48.1735	23.1983	1.05422	0.00162826	0.019227	Phosphatidylinositol-4-phosphate 5-kinase family protein (AHRD V1 **** D7KK53_ARALL); contains Interpro domain(s) IPR016034 Phosphatidylinositol-4-phosphate 5-kinase, core, subgroup	AT1G34260	46.59	0	NA	FORMS APLOID AND BINUCLEATE CELLS 1A;FORMS APLOID AND BINUCLEATE CELLS 1A;FORMS APLOID AND BINUCLEATE CELLS 1A	PIP5K Phosphatidylinositol-4-phosphate 5-Kinase
	Down		Cla023162	Chr11:18039197_18040432(+)	68.3439	156.572	-1.19594	0.00374916	0.0259946	Universal stress protein family protein (AHRD V1 **** D7KNT6_ARALL); contains Interpro domain(s) IPR006016 UspA	AT1G44760	69.81	9e-71	NA	Adenine nucleotide alpha hydrolases-like superfamily protein;Adenine nucleotide alpha hydrolases-like superfamily protein;Adenine nucleotide alpha hydrolases-like superfamily protein	Usp Universal stress protein family
	Up		Cla013950	Chr8:14546415_14551265(+)	31.7338	13.9745	1.18322	0.00232945	0.021929	Cation transport regulator-like protein 2 (AHRD V1 ***- F1L4C5_ASCSU); contains Interpro domain(s) IPR006840 ChaC-like protein	AT1G44790	59.14	1e-73	NA	ChaC-like family protein;ChaC-like family protein;ChaC-like family protein	ChaC ChaC-like protein
	Down		Cla010256	Chr9:29372950_29373876(-)	2.66068	8.14527	-1.61417	0.00819756	0.036138	Gibberellin receptor GID1L2 (AHRD V1 **-- B6TIA5_MAIZE); contains Interpro domain(s) IPR013094 Alpha/beta hydrolase fold-3	AT1G47480	40.13	6e-77	NA	alpha/beta-Hydrolases superfamily protein;alpha/beta-Hydrolases superfamily protein;alpha/beta-Hydrolases superfamily protein	Abhydrolase_3 alpha/beta hydrolase fold; COesterase Carboxylesterase family
	Down		Cla015939	Chr2:5262472_5263203(+)	1.28885	6.43238	-2.31927	0.00661506	0.0325736	Unknown Protein (AHRD V1)	AT1G49330	46.29	2e-48	NA	hydroxyproline-rich glycoprotein family protein;hypothetical protein;hypothetical protein	No hits detected that satisfy reporting thresholds
	Down		Cla016097	Chr2:7504545_7511285(-)	9.79091	25.7059	-1.39258	0.0114871	0.0424448	DNA polymerase IV (AHRD V1 *-** D6RLC7_COPC7); contains Interpro domain(s) IPR001126 DNA-repair protein, UmuC-like	AT1G49980	59.83	0	NA	DNA/RNA polymerases superfamily protein;DNA/RNA polymerases superfamily protein;DNA/RNA polymerases superfamily protein	IMS impB/mucB/samB family; IMS_C impB/mucB/samB family C-terminal domain; zf_UBZ Ubiquitin-Binding Zinc Finger
	Down		Cla012526	Chr7:23807059_23813639(+)	14.941	31.7205	-1.08614	0.0128841	0.0449689	Kelch-like protein 20 (AHRD V1 *-*- E2A5N0_CAMFO); contains Interpro domain(s) IPR015915 Kelch-type beta propeller	AT1G51540	75.66	0	NA	Galactose oxidase/kelch repeat superfamily protein;Galactose oxidase/kelch repeat superfamily protein	Kelch_1 Kelch motif; Kelch_6 Kelch motif; Kelch_4 Galactose oxidase, central domain; Kelch_2 Kelch motif; Kelch_3 Galactose oxidase, central domain
	Up		Cla000895	Chr0:21012631_21013287(+)	14.0393	4.88722	1.52239	0.00771083	0.0351037	Avr9/Cf-9 rapidly elicited protein 146 (AHRD V1 **-- Q9FQZ6_TOBAC)	AT1G52140	46.22	2e-52	NA	Avr9/Cf-9 rapidly elicited protein;Avr9/Cf-9 rapidly elicited protein;cotton fiber protein	DUF761 Cotton fibre expressed protein
	Down		Cla007154	Chr5:16809206_16809874(+)	3.70729	26.1215	-2.8168	0.0132174	0.0455291	Disease resistance (AHRD V1 ***- Q2HRV3_MEDTR)	AT1G52140	31.7	2e-17	NA	Avr9/Cf-9 rapidly elicited protein;Avr9/Cf-9 rapidly elicited protein;cotton fiber protein	DUF761 Cotton fibre expressed protein
	Down		Cla015466	Chr9:1346385_1353623(+)	5.32025	19.9764	-1.90873	2.63e-05	0.00881891	Cytochrome c oxidase assembly protein COX19 (AHRD V1 *-*- B6SM12_MAIZE); contains Interpro domain(s) IPR010625 CHCH	AT1G52155	73.42	1e-160	NA	transmembrane protein;cytochrome c oxidase 19-2;cytochrome c oxidase 19-2	CHCH CHCH domain
	Up		Cla015447	Chr9:1485764_1486240(-)	111.766	37.6696	1.56901	0.000704715	0.0152975	Dynein light chain 1 cytoplasmic (AHRD V1 ***- Q7RN10_PLAYO); contains Interpro domain(s) IPR001372 Dynein light chain, type 1 and 2	AT1G52245	80.65	6e-53	NA	dynein light chain LC6%2C flagellar outer arm-like protein;Dynein light chain type 1 family protein;Dynein light chain type 1 family protein	Dynein_light Dynein light chain type 1
	Down	Down	Cla016720	Chr11:24127917_24132902(+)	4.0368	30.0944	-2.89821	6.37e-05	0.00982612	Signal peptidase complex catalytic subunit Sec11 (AHRD V1 ***- E5S9G8_TRISP); contains Interpro domain(s) IPR001733 Peptidase S26B, eukaryotic signal peptidase	AT1G52600	75	1e-96	NA	Peptidase S24/S26A/S26B/S26C family protein;Peptidase S24/S26A/S26B/S26C family protein	Peptidase_S24 Peptidase S24-like
	Down		Cla015385	Chr9:2006728_2007799(+)	0.0694967	4.58288	-6.04317	0.00752544	0.0345204	Late embryogenesis abundant protein (AHRD V1 *-*- Q2QKE8_CATRO)	AT1G52680	45.45	4e-16	NA	late embryogenesis abundant protein-related / LEA protein-like protein;Late embryogenesis abundant protein (LEA) family protein;Late embryogenesis abundant protein (LEA) family protein	No hits detected that satisfy reporting thresholds
	Down		Cla012695	Chr7:25457724_25460794(+)	1.75858	4.04183	-1.2006	0.0010197	0.0168892	Acyl-protein thioesterase 2 (AHRD V1 **-- B6T1C9_MAIZE); contains Interpro domain(s) IPR003140 Phospholipase/carboxylesterase	AT1G52700	72.76	3e-135	NA	alpha/beta-Hydrolases superfamily protein;alpha/beta-Hydrolases superfamily protein;alpha/beta-Hydrolases superfamily protein	Abhydrolase_2 Phospholipase/Carboxylesterase; FSH1 Serine hydrolase (FSH1); Hydrolase_4 Serine aminopeptidase, S33
	Down		Cla015399	Chr9:1909816_1912933(-)	2.11375	10.3225	-2.28792	0.000312074	0.0129433	BTB/POZ domain-containing protein At1g30440 (AHRD V1 **-- Y1044_ARATH); contains Interpro domain(s) IPR004249 NPH3	AT1G52770	58.28	2e-173	NA	Phototropic-responsive NPH3 family protein;Phototropic-responsive NPH3 family protein;Phototropic-responsive NPH3 family protein	NPH3 NPH3 family
	Up		Cla010826	Chr7:30211275_30212050(-)	4.73897	2.02346	1.22775	0.00982202	0.0391055	NBS/LRR resistance protein-like protein (Fragment) (AHRD V1 *-*- Q945Y6_THECC); contains Interpro domain(s) IPR002182 NB-ARC	AT1G53350	23.2	4e-15	NA	Disease resistance protein (CC-NBS-LRR class) family	NB-ARC NB-ARC domain; Rx_N Rx N-terminal domain
	Down		Cla023309	Chr11:19483319_19489887(-)	1.09023	9.76729	-3.16333	0.00339125	0.0249647	Leucine-rich repeat receptor-like protein kinase (AHRD V1 *--- C0LGF2_ARATH); contains Interpro domain(s) IPR011009 Protein kinase-like	AT1G53420	63.49	3e-15	NA	Leucine-rich repeat transmembrane protein kinase;Leucine-rich repeat transmembrane protein kinase;Leucine-rich repeat (LRR) family protein	LRR_8 Leucine rich repeat; LRR_4 Leucine Rich repeats (2 copies)
	Up		Cla012543	Chr7:23955476_23955724(-)	24.5194	11.0841	1.14544	0.012107	0.043477	Dormancy/auxin associated family protein (AHRD V1 *-*- F4HV65_ARATH); contains Interpro domain(s) IPR008406 Dormancyauxin associated	AT1G54070	43.9	6e-13	NA	Dormancy/auxin associated family protein;Dormancy/auxin associated family protein;Dormancy/auxin associated family protein	Auxin_repressed Dormancy/auxin associated protein
	Down	Down	Cla017564	Chr10:24024597_24025175(+)	3.92778	29.774	-2.92227	0.000182136	0.011942	Disease resistance-responsive (Dirigent-like protein) family protein (AHRD V1 ***- Q9SS03_ARATH); contains Interpro domain(s) IPR004265 Plant disease resistance response protein	AT1G55210	57.14	5e-62	NA	Disease resistance-responsive (dirigent-like protein) family protein;Disease resistance-responsive (dirigent-like protein) family protein;Disease resistance-responsive (dirigent-like protein) family protein	Dirigent Dirigent-like protein
	Down		Cla001765	Chr3:20984022_20984714(+)	21.504	47.8939	-1.15524	0.000980043	0.0165911	POT family domain containing protein expressed (AHRD V1 *-*- D8L9H8_WHEAT); contains Interpro domain(s) IPR007493 Protein of unknown function DUF538	AT1G55265	60.68	2e-46	NA	DUF538 family protein%2C putative (Protein of unknown function%2C DUF538);transmembrane protein%2C putative (Protein of unknown function%2C DUF538);serine protease%2C putative (Protein of unknown function%2C DUF538)	DUF538 Protein of unknown function, DUF538
	Up		Cla005219	Chr3:28009622_28010953(-)	81.7619	29.4704	1.47216	0.00512247	0.0291363	Dormancy/auxin associated protein (AHRD V1 ***- A8MSC4_ARATH); contains Interpro domain(s) IPR008406 Dormancyauxin associated	AT1G56220	58.62	2e-26	NA	Dormancy/auxin associated family protein;Dormancy/auxin associated family protein;Dormancy/auxin associated family protein	Auxin_repressed Dormancy/auxin associated protein
	Down		Cla005163	Chr3:28492884_28493716(+)	0.0832367	5.08542	-5.933	0.000253949	0.012665	Glycine-rich protein (AHRD V1 ***- F4K4U0_ARATH)	AT1G56320	47.19	2e-19	NA	hypothetical protein;Glycine-rich protein family;Glycine-rich protein family	No hits detected that satisfy reporting thresholds
	Down		Cla023050	Chr11:16853078_16854022(+)	1.6363	24.0098	-3.87511	0.00177852	0.0200133	Methyltransferase (AHRD V1 ***- Q9M005_ARATH)	AT1G58120	55.6	7e-85	NA	hypothetical protein;methyltransferase;peptide upstream protein	No hits detected that satisfy reporting thresholds
	Down	Down	Cla023056	Chr11:16924584_16927845(+)	1.659	36.4229	-4.45646	0.00549547	0.0300231	Kinase interacting family protein (AHRD V1 ***- Q9C6Q9_ARATH); contains Interpro domain(s) IPR011684 KIP1-like	AT1G58215	45.46	0	NA	spindle pole body component 110;Kinase interacting (KIP1-like) family protein;Kinase interacting (KIP1-like) family protein	KIP1 KIP1-like protein
	Up		Cla022654	Chr8:25432710_25437117(+)	20.2912	7.95066	1.35171	0.000812032	0.01581	Early-responsive to dehydration stress protein (ERD4) (AHRD V1 **-- F4I248_ARATH); contains Interpro domain(s) IPR003864 Protein of unknown function DUF221	AT1G58520	60.6	0	NA	GDSL-like lipase/acylhydrolase superfamily protein;GDSL-like lipase/acylhydrolase superfamily protein;GDSL-like lipase/acylhydrolase superfamily protein	RSN1_7TM Calcium-dependent channel, 7TM region, putative phosphate; RSN1_TM Late exocytosis, associated with Golgi transport; PHM7_cyt Cytosolic domain of 10TM putative phosphate transporter
	Up		Cla019461	Chr3:5455958_5457361(-)	15.9975	7.17936	1.15592	0.00327354	0.0245386	Cotton fiber expressed protein 1 (AHRD V1 ***- O81373_GOSHI); contains Interpro domain(s) IPR008480 Protein of unknown function DUF761, plant	AT1G61260	40.72	3e-67	NA	cotton fiber (DUF761);cotton fiber-like protein (DUF761);cotton fiber%2C putative (DUF761)	DUF761 Cotton fibre expressed protein; DUF4408 Domain of unknown function (DUF4408)
	Up		Cla011408	Chr1:2026356_2026988(-)	3.71193	1.6917	1.13369	0.00844745	0.0365692	Late embryogenesis abundant hydroxyproline-rich glycoprotein (AHRD V1 **-- Q6DST1_ARATH); contains Interpro domain(s) IPR010847 Harpin-induced 1	AT1G64065	31.48	2e-26	NA	Late embryogenesis abundant (LEA) hydroxyproline-rich glycoprotein family;Late embryogenesis abundant (LEA) hydroxyproline-rich glycoprotein family;Late embryogenesis abundant (LEA) hydroxyproline-rich glycoprotein family	LEA_2 Late embryogenesis abundant protein
	Down	Down	Cla004992	Chr1:1203603_1211815(-)	4.14643	18.2292	-2.13631	0.00184759	0.0201058	Alcohol dehydrogenase 2 (AHRD V1 ***- B6TDN5_MAIZE); contains Interpro domain(s) IPR002085 Alcohol dehydrogenase superfamily, zinc-containing	AT1G64710	70.5	1e-135	NA	GroES-like zinc-binding alcohol dehydrogenase family protein;GroES-like zinc-binding dehydrogenase family protein;GroES-like zinc-binding alcohol dehydrogenase family protein	ADH_N Alcohol dehydrogenase GroES-like domain; ADH_zinc_N Zinc-binding dehydrogenase
	Down	Down	Cla005759	Chr11:11345903_11346559(-)	1.89577	10.0517	-2.40658	0.00172071	0.0196114	LOB domain protein (AHRD V1 *-*- Q9AS62_ORYSJ); contains Interpro domain(s) IPR004883 Lateral organ boundaries, LOB	AT1G65620	65.45	1e-79	NA	Lateral organ boundaries (LOB) domain family protein;Lateral organ boundaries (LOB) domain family protein;Lateral organ boundaries (LOB) domain family protein	LOB Lateral organ boundaries (LOB) domain
	Down		Cla016922	Chr11:26135373_26137478(-)	0.0945853	4.01625	-5.40809	0.00016373	0.0116885	DNA helicase (AHRD V1 *--- B5ID88_ACIB4)	AT1G65810	56.77	4e-47	NA	No Hits	AAA_12 AAA domain
	Up		Cla003307	Chr9:33237421_33239753(+)	12.1169	5.55669	1.12472	0.008233	0.036138	Zinc finger protein 36, C3H1 type-like 2-A (AHRD V1 *--* TISDA_XENLA); contains Interpro domain(s) IPR000571 Zinc finger, CCCH-type	AT1G66810	48.39	6e-06	NA	No Hits	zf-CCCH Zinc finger C-x8-C-x5-C-x3-H type (and similar); zf-CCCH_4 CCCH-type zinc finger; zf_CCCH_4 Zinc finger domain
	Up		Cla018487	Chr4:22516285_22521435(+)	6.68577	3.13089	1.09452	0.00106134	0.0170355	Receptor-like protein kinase (AHRD V1 **** D3G6F0_CAPAN); contains Interpro domain(s) IPR002290 Serine/threonine protein kinase	AT1G67000	25.1	1e-14	NA	Protein kinase superfamily protein;Protein kinase family protein;Protein kinase superfamily protein	Pkinase Protein kinase domain; Pkinase_Tyr Protein tyrosine kinase; WAK_assoc Wall-associated receptor kinase C-terminal; GUB_WAK_bind Wall-associated receptor kinase galacturonan-binding
	Down		Cla019275	Chr6:26610986_26612237(-)	14.1925	28.8039	-1.02113	0.000215406	0.012665	Zinc finger family protein (AHRD V1 **** D7KV22_ARALL); contains Interpro domain(s) IPR011990 Tetratricopeptide-like helical	AT1G67340	66.56	8e-152	NA	HCP-like superfamily protein with MYND-type zinc finger;HCP-like superfamily protein with MYND-type zinc finger	zf-MYND MYND finger
	Down		Cla020410	Chr5:30065940_30066335(-)	3.81715	9.17274	-1.26486	0.0116868	0.0427545	Unknown Protein (AHRD V1)	AT1G68350	37.32	1e-14	NA	cotton fiber protein	DUF761 Cotton fibre expressed protein
	Down		Cla014148	Chr1:28615447_28616559(+)	0.824741	11.3487	-3.78245	0.00900583	0.0377285	Galactosyltransferase-like protein (Fragment) (AHRD V1 **-- D8RAJ4_SELML); contains Interpro domain(s) IPR004263 Exostosin-like	AT1G68470	63.16	2e-168	NA	Exostosin family protein;Exostosin family protein;Exostosin family protein	Exostosin Exostosin family
	Down		Cla017437	Chr10:22525943_22527952(-)	4.89661	24.3586	-2.31458	0.00186763	0.0201956	Nitrate transporter (AHRD V1 ***- Q7XAK5_PRUPE); contains Interpro domain(s) IPR000109 TGF-beta receptor, type I/II extracellular region	AT1G68570	55.56	0	NA	Major facilitator superfamily protein;Major facilitator superfamily protein;peptide transporter 2	PTR2 POT family
	Down		Cla022037	Chr8:19763890_19764343(+)	5.04429	10.6987	-1.08471	0.00343063	0.0250713	MADS-box transcription factor 3 (AHRD V1 ***- D1MFS8_HEVBR); contains Interpro domain(s) IPR002100 Transcription factor, MADS-box	AT1G69120	95.08	2e-36	NA	K-box region and MADS-box transcription factor family protein;AGAMOUS-like 8;K-box region and MADS-box transcription factor family protein	SRF-TF SRF-type transcription factor (DNA-binding and dimerisation domain)
	Down		Cla010199	Chr5:31285094_31286926(+)	9.37341	21.7545	-1.21467	9.03e-05	0.010233	Negatively light-regulated protein (AHRD V1 ***- Q9ZTG1_VERFO); contains Interpro domain(s) IPR012482 Lg106-like	AT1G69510	58.06	9e-37	NA	cAMP-regulated phosphoprotein 19-related protein;cAMP-regulated phosphoprotein 19-related protein;cAMP-regulated phosphoprotein 19-related protein	Endosulfine cAMP-regulated phosphoprotein/endosulfine conserved region
	Down		Cla013795	Chr8:16489166_16489597(-)	0.367202	11.3729	-4.95289	0.00029225	0.0129433	Unknown Protein (AHRD V1)	AT1G71740	42.96	5e-27	NA	nucleolar protein;transmembrane protein	No hits detected that satisfy reporting thresholds
	Down		Cla016362	Chr9:9564372_9564914(+)	2.36843	67.3189	-4.82901	0.000393608	0.0134837	Unknown Protein (AHRD V1)	AT1G71910	26.86	6e-09	NA	hypothetical protein;hypothetical protein	No hits detected that satisfy reporting thresholds
	Up		Cla012491	Chr8:461145_462375(-)	2.18951	0.251573	3.12156	0.00259715	0.0228271	Transmembrane protein 205 (AHRD V1 *--- TM205_HUMAN)	AT1G72100	35.54	2e-73	NA	late embryogenesis abundant domain-containing protein / LEA domain-containing protein;Late embryogenesis abundant protein (LEA) family protein;Late embryogenesis abundant protein (LEA) family protein	DUF4149 Domain of unknown function (DUF4149)
	Down		Cla021079	Chr5:218832_219475(-)	2.18064	20.1804	-3.21013	0.00105852	0.0170355	Blue copper protein (AHRD V1 *--- B6TI66_MAIZE); contains Interpro domain(s) IPR003245 Plastocyanin-like	AT1G72230	43.24	1e-31	NA	Cupredoxin superfamily protein;Cupredoxin superfamily protein;uclacyanin 1	Cu_bind_like Plastocyanin-like domain
	Down		Cla022115	Chr8:20540049_20540689(-)	0.036638	9.90702	-8.07897	6.32e-05	0.00982612	Blue copper-like protein (AHRD V1 **-- A3F8V0_GOSHI); contains Interpro domain(s) IPR003245 Plastocyanin-like	AT1G72230	56.78	7e-39	NA	Cupredoxin superfamily protein;Cupredoxin superfamily protein;Cupredoxin superfamily protein	Cu_bind_like Plastocyanin-like domain
	Up		Cla015560	Chr9:434151_435197(+)	40.8482	12.139	1.75062	0.00160635	0.0191231	Mitochondrial carrier-like protein (AHRD V1 ***- Q8L9F8_ARATH); contains Interpro domain(s) IPR001993 Mitochondrial substrate carrier	AT1G72820	75.78	0	NA	Mitochondrial substrate carrier family protein;Mitochondrial substrate carrier family protein;Mitochondrial substrate carrier family protein	Mito_carr Mitochondrial carrier protein
	Down		Cla003139	Chr2:34165523_34166890(+)	6.7018	18.0284	-1.42765	0.00168038	0.0195568	Geranylgeranyl reductase (AHRD V1 ***- Q56GA3_MEDTR); contains Interpro domain(s) IPR011774 Geranylgeranyl reductase, plants and cyanobacteria	AT1G74470	61.47	0	NA	Pyridine nucleotide-disulfide oxidoreductase family protein	FAD_binding_3 FAD binding domain
	Down	Down	Cla018608	Chr4:23691829_23694140(-)	6.47676	27.8972	-2.10677	3.03e-05	0.00881891	Exostosin family protein (AHRD V1 **-- D7LML7_ARALL); contains Interpro domain(s) IPR004263 Exostosin-like	AT1G74680	61.2	0	NA	Exostosin family protein;exostosin family protein;Exostosin family protein	Exostosin Exostosin family
	Up		Cla019139	Chr6:25415962_25418758(+)	19.8974	9.1555	1.11987	0.00504824	0.0290029	Nodulin-related protein (Fragment) (AHRD V1 *-*- A8QU69_TRITU); contains Interpro domain(s) IPR010658 Nodulin-like	AT1G74780	57.51	0	NA	Nodulin-like / Major Facilitator Superfamily protein;Nodulin-like / Major Facilitator Superfamily protein;Nodulin-like / Major Facilitator Superfamily protein	Nodulin-like Nodulin-like; MFS_1 Major Facilitator Superfamily
	Down		Cla008323	Chr1:10437349_10439429(-)	1.82516	7.99033	-2.13023	0.00211837	0.0211425	IFA binding protein (AHRD V1 *--- A6MGY3_LILLO); contains Interpro domain(s) IPR007656 Protein of unknown function DUF593	AT1G74830	53.8	1e-146	NA	myosin-binding protein%2C putative (Protein of unknown function%2C DUF593);myosin-binding protein%2C putative (Protein of unknown function%2C DUF593);myosin-binding protein (Protein of unknown function%2C DUF593)	Zein-binding Zein-binding
	Up		Cla022498	Chr8:24181021_24182437(+)	125.837	56.3964	1.15789	0.000334583	0.0130285	2-hydroxyacid dehydrongenase (Fragment) (AHRD V1 *--- C6F725_PSEMZ)	AT1G75180	62.72	1e-118	NA	Erythronate-4-phosphate dehydrogenase family protein;Erythronate-4-phosphate dehydrogenase family protein;Erythronate-4-phosphate dehydrogenase family protein	No hits detected that satisfy reporting thresholds
	Down		Cla022484	Chr8:24052815_24053536(+)	4.93266	16.1516	-1.71124	0.000904544	0.0162687	Isoflavone reductase-like protein 4 (AHRD V1 ***- Q3KN69_VITVI); contains Interpro domain(s) IPR008030 NmrA-like	AT1G75280	77.67	4e-49	NA	NmrA-like negative transcriptional regulator family protein;NmrA-like negative transcriptional regulator family protein;NAD(P)-binding Rossmann-fold superfamily protein	NmrA NmrA-like family; NAD_binding_10 NAD(P)H-binding; Epimerase NAD dependent epimerase/dehydratase family; Sacchrp_dh_NADP Saccharopine dehydrogenase NADP binding domain; 3Beta_HSD 3-beta hydroxysteroid dehydrogenase/isomerase family; GDP_Man_Dehyd GDP-mannose 4,6 dehydratase
	Up		Cla023437	Chr11:20749442_20750254(-)	12.2118	5.54374	1.13935	0.011086	0.0415649	CM0216.330.nc protein (AHRD V1 ***- B0BLI1_LOTJA); contains Interpro domain(s) IPR004320 Protein of unknown function DUF241, plant	AT1G76240	49.07	4e-70	NA	DUF241 domain protein (DUF241);hypothetical protein (DUF241);hypothetical protein (DUF241)	DUF241 Arabidopsis protein of unknown function
	Down	Down	Cla023439	Chr11:20760782_20763580(-)	1.46267	67.5276	-5.5288	0.00321292	0.0243097	AT1G76250-like protein (Fragment) (AHRD V1 *-*- D6PP03_9BRAS)	AT1G76250	60.24	6e-173	NA	transmembrane protein	No hits detected that satisfy reporting thresholds
	Down		Cla022791	Chr11:13363381_13363872(-)	4.96342	21.1173	-2.08902	0.00171342	0.0196106	Unknown Protein (AHRD V1)	AT1G76600	26.71	3e-13	NA	poly polymerase;poly polymerase;hypothetical protein	DUF4228 Domain of unknown function (DUF4228)
	Down		Cla014260	Chr1:29498785_29500359(-)	11.8443	27.6411	-1.22262	8.53e-05	0.00997891	Glutaredoxin C3 (AHRD V1 ***- B9HFC1_POPTR); contains Interpro domain(s) IPR011899 Glutaredoxin, eukaryotic and viruses	AT1G77370	74.7	3e-41	NA	Glutaredoxin family protein;Glutaredoxin family protein;Glutaredoxin family protein	Glutaredoxin Glutaredoxin
	Down		Cla022078	Chr8:20161114_20164518(+)	5.01135	20.9678	-2.06491	0.0108503	0.0410277	Beta-1 3-galactosyltransferase 6 (AHRD V1 ***- B6UBH3_MAIZE); contains Interpro domain(s) IPR002659 Glycosyl transferase, family 31	AT1G77810	65.71	0	NA	Galactosyltransferase family protein;Galactosyltransferase family protein;Galactosyltransferase family protein	Galactosyl_T Galactosyltransferase; DUF4094 Domain of unknown function (DUF4094)
	Down		Cla000885	Chr0:20927873_20933341(-)	2.53474	75.0782	-4.88848	0.00028944	0.0129433	DS synthase (AHRD V1 ***- F4YF84_PANQU); contains Interpro domain(s) IPR018333 Squalene cyclase	AT1G78950	70.75	0	NA	Terpenoid cyclases family protein;Terpenoid cyclases family protein;camelliol C synthase 1	SQHop_cyclase_C Squalene-hopene cyclase C-terminal domain; SQHop_cyclase_N Squalene-hopene cyclase N-terminal domain; Prenyltrans Prenyltransferase and squalene oxidase repeat
	Down	Down	Cla019330	Chr6:26979947_26985313(-)	0.483969	280.257	-9.17762	0.000240158	0.012665	DS synthase (AHRD V1 ***- F4YF84_PANQU); contains Interpro domain(s) IPR018333 Squalene cyclase	AT1G78950	63.21	0	NA	Terpenoid cyclases family protein;Terpenoid cyclases family protein;camelliol C synthase 1	SQHop_cyclase_N Squalene-hopene cyclase N-terminal domain; SQHop_cyclase_C Squalene-hopene cyclase C-terminal domain; Prenyltrans Prenyltransferase and squalene oxidase repeat; Pec_lyase Pectic acid lyase
	Down		Cla017221	Chr10:18502016_18508271(+)	3.10028	6.54228	-1.07739	0.000651355	0.0149832	Serine/threonine protein kinase (AHRD V1 **** E5RDC4_CUCME); contains Interpro domain(s) IPR002290 Serine/threonine protein kinase	AT1G79640	56.91	0	NA	Protein kinase superfamily protein;Protein kinase superfamily protein;Protein kinase superfamily protein	Pkinase Protein kinase domain; Pkinase_Tyr Protein tyrosine kinase
	Down		Cla020317	Chr5:30891184_30893049(-)	4.75149	12.485	-1.39374	0.00205051	0.0208705	18S pre-ribosomal assembly protein gar2-related protein (AHRD V1 *-*- F4ITB8_ARATH)	AT2G03810	55.81	3e-11	NA	No Hits	No hits detected that satisfy reporting thresholds
	Down		Cla018682	Chr6:20924550_20925449(+)	30.6368	62.6467	-1.03197	0.00082235	0.0159286	Jp18 (AHRD V1 *-*- Q8H6R4_PONTR); contains Interpro domain(s) IPR010993 Sterile alpha motif homology	AT2G12462	37.76	5e-35	NA	sterile alpha motif (SAM) domain protein;Sterile alpha motif (SAM) domain-containing protein;Sterile alpha motif (SAM) domain-containing protein	No hits detected that satisfy reporting thresholds
	Down	Down	Cla016062	Chr2:7009944_7012077(+)	0.336808	36.869	-6.77434	0.000559853	0.014235	PBSP domain protein (AHRD V1 **-- E9DUN1_METAQ); contains Interpro domain(s) IPR007541 Plant Basic Secretory Protein	AT2G15220	54.91	9e-87	NA	Plant basic secretory protein (BSP) family protein;Plant basic secretory protein (BSP) family protein;Plant basic secretory protein (BSP) family protein	BSP Peptidase of plants and bacteria
	Down	Down	Cla014582	Chr7:20687653_20690743(-)	4.25722	30.495	-2.84059	3.7e-05	0.00976752	Hydrolase alpha/beta fold family protein (AHRD V1 ***- D7LBB3_ARALL); contains Interpro domain(s) IPR000073 Alpha/beta hydrolase fold-1	AT2G18360	62.5	3e-154	NA	alpha/beta-Hydrolases superfamily protein;alpha/beta-Hydrolases superfamily protein;alpha/beta-Hydrolases superfamily protein	Abhydrolase_1 alpha/beta hydrolase fold; Abhydrolase_6 Alpha/beta hydrolase family; Hydrolase_4 Serine aminopeptidase, S33
	Down		Cla020839	Chr5:26334748_26335265(+)	6.16008	97.7248	-3.98771	0.00200629	0.0208011	Gibberellin-regulated family protein (AHRD V1 *--- F4IQJ4_ARATH); contains Interpro domain(s) IPR003854 Gibberellin regulated protein	AT2G18420	75.41	1e-27	NA	GAST1 protein homolog 1;Gibberellin-regulated family protein;GAST1 protein homolog 1	GASA Gibberellin regulated protein
	Down		Cla022808	Chr11:13707131_13707481(+)	2.56523	10.5064	-2.0341	0.00281625	0.0235296	Unknown Protein (AHRD V1)	AT2G18969	35.04	3e-11	NA	transcription factor/transcription regulator;ILI1 binding bHLH 1;hypothetical protein	No hits detected that satisfy reporting thresholds
	Up		Cla002749	Chr7:652565_660063(-)	2.76478	0.875199	1.65948	0.000509575	0.0139073	BHLH transcription factor (AHRD V1 *-*- B6TXR4_MAIZE); contains Interpro domain(s) IPR011598 Helix-loop-helix DNA-binding	AT2G20180	37.5	5e-77	NA	phytochrome interacting factor 3-like 5;phytochrome interacting factor 3-like 5;phytochrome interacting factor 3-like 5	HLH Helix-loop-helix DNA-binding domain
	Down		Cla013581	Chr2:27813218_27813580(-)	9.77273	49.63	-2.34438	0.000298216	0.0129433	Unknown Protein (AHRD V1)	AT2G20870	33.66	3e-08	NA	cell wall protein precursor	No hits detected that satisfy reporting thresholds
	Up		Cla012116	Chr4:15955862_15960887(+)	22.5991	4.3839	2.36598	0.000402932	0.0134837	Os05g0264200 protein (Fragment) (AHRD V1 *-*- Q0DJL6_ORYSJ); contains Interpro domain(s) IPR006927 Protein of unknown function DUF639	AT2G21720	57.7	0	NA	ArgH (DUF639);ArgH (DUF639);heat-inducible transcription repressor (DUF639)	DUF639 Plant protein of unknown function (DUF639)
	Down		Cla014019	Chr1:27428285_27429774(+)	0.523522	11.3761	-4.44161	0.000842594	0.0160405	Acetyltransferase GNAT family protein expressed (AHRD V1 **** Q10Q85_ORYSJ); contains Interpro domain(s) IPR000182 GCN5-related N-acetyltransferase	AT2G23060	69.19	0	NA	Acyl-CoA N-acyltransferases (NAT) superfamily protein;Acyl-CoA N-acyltransferases (NAT) superfamily protein;Acyl-CoA N-acyltransferases (NAT) superfamily protein	Acetyltransf_1 Acetyltransferase (GNAT) family
	Down		Cla012936	Chr9:21345163_21352175(-)	0.658393	13.6971	-4.37878	0.000324017	0.0129433	Glutamine amidotransferase class-I (AHRD V1 ***- A2Q1P2_MEDTR); contains Interpro domain(s) IPR000991 Glutamine amidotransferase class-I, C-terminal	AT2G23970	48.84	8e-74	NA	Class I glutamine amidotransferase-like superfamily protein;Class I glutamine amidotransferase-like superfamily protein;Class I glutamine amidotransferase-like superfamily protein	GATase Glutamine amidotransferase class-I; Peptidase_C26 Peptidase C26
	Down		Cla018742	Chr6:21565606_21568079(-)	1.14455	4.18667	-1.87103	0.0046679	0.0281295	Unknown Protein (AHRD V1); contains Interpro domain(s) IPR003604 Zinc finger, U1-type	AT2G24030	26.59	5e-15	NA	zinc ion binding / nucleic acid binding protein;RNA recognition motif (RRM)-containing protein	zf-met Zinc-finger of C2H2 type
	Down		Cla008631	Chr2:32407632_32408681(+)	3.05003	11.3871	-1.9005	0.0114015	0.0422522	F-box family protein (AHRD V1 ***- B9MYU0_POPTR); contains Interpro domain(s) IPR001810 Cyclin-like F-box	AT2G27310	41.25	4e-78	NA	F-box family protein;F-box family protein;F-box family protein	No hits detected that satisfy reporting thresholds
	Down		Cla017426	Chr10:15722004_15722408(+)	0	4.6385	#NAME?	0.0154997	0.0495348	Dephospho-CoA kinase (AHRD V1 ***- B6T8Y9_MAIZE); contains Interpro domain(s) IPR001977 Dephospho-CoA kinase	AT2G27490	67.06	2e-33	NA	dephospho-CoA kinase family;dephospho-CoA kinase family;dephospho-CoA kinase family	CoaE Dephospho-CoA kinase
	Up		Cla017723	Chr10:25622160_25623056(-)	8.19892	3.81091	1.1053	0.00572097	0.0304198	AT5G28150-like protein (Fragment) (AHRD V1 *-*- D6PS17_9BRAS); contains Interpro domain(s) IPR008586 Protein of unknown function DUF868, plant	AT2G27770	38.21	8e-62	NA	DUF868 family protein (DUF868);DUF868 family protein%2C putative (DUF868);hypothetical protein (DUF868)	DUF868 Plant protein of unknown function (DUF868)
	Up		Cla008673	Chr2:32031941_32032607(-)	110.977	41.4987	1.41912	0.00131369	0.0182864	Pentatricopeptide repeat-containing protein (AHRD V1 **-- D7ME07_ARALL)	AT2G27830	55	1e-58	NA	hypothetical protein;PPR containing protein;hypothetical protein	No hits detected that satisfy reporting thresholds
	Down		Cla001054	Chr1:11671925_11674567(-)	1.17627	9.7112	-3.04542	0.000102187	0.0103379	PLATZ transcription factor (Fragment) (AHRD V1 **-- F1DJR5_MAIZE); contains Interpro domain(s) IPR006734 Protein of unknown function DUF597	AT2G27930	52.75	2e-69	NA	PLATZ transcription factor family protein;PLATZ transcription factor family protein;PLATZ transcription factor family protein	PLATZ PLATZ transcription factor
	Down	Down	Cla008715	Chr2:31645728_31647981(-)	1.51481	5.08337	-1.74665	0.00378699	0.0260782	UDP-glycosyltransferase (AHRD V1 ***- D7KLQ4_ARALL); contains Interpro domain(s) IPR002213 UDP-glucuronosyl/UDP-glucosyltransferase	AT2G28080	62.98	0	NA	UDP-Glycosyltransferase superfamily protein;UDP-Glycosyltransferase superfamily protein;UDP-Glycosyltransferase superfamily protein	UDPGT UDP-glucoronosyl and UDP-glucosyl transferase
	Down		Cla008697	Chr2:31812273_31813172(+)	6.15174	13.3082	-1.11325	0.0135619	0.0461339	Zinc finger family protein (AHRD V1 ***- D7LWQ5_ARALL); contains Interpro domain(s) IPR007087 Zinc finger, C2H2-type	AT2G28200	50	2e-55	NA	C2H2-type zinc finger family protein;C2H2-type zinc finger family protein;C2H2-type zinc finger family protein	zf-C2H2_6 C2H2-type zinc finger; zf-C2H2_4 C2H2-type zinc finger; zf-C2H2 Zinc finger, C2H2 type
	Up		Cla008740	Chr2:31374404_31374913(+)	23.0576	5.98434	1.94598	0.00012048	0.0105099	Arabidopsis thaliana genomic DNA chromosome 5 P1 clone MOK16 (AHRD V1 **-- Q9LYW2_ARATH); contains Interpro domain(s) IPR007608 Protein of unknown function DUF584	AT2G28400	48.04	1e-36	NA	senescence regulator (Protein of unknown function%2C DUF584);transcription initiation factor TFIID subunit (Protein of unknown function%2C DUF584);transcription initiation factor TFIID subunit (Protein of unknown function%2C DUF584)	Senescence_reg Senescence regulator
	Down	Down	Cla001230	Chr6:4219624_4220810(+)	0.200394	50.4447	-7.97572	0.000435538	0.0136976	Legumin-like protein (AHRD V1 **-- B6TDD3_MAIZE); contains Interpro domain(s) IPR014710 RmlC-like jelly roll fold	AT2G28680	73.6	0	NA	RmlC-like cupins superfamily protein;RmlC-like cupins superfamily protein;RmlC-like cupins superfamily protein	Cupin_1 Cupin
	Down	Down	Cla007233	Chr7:5308315_5309466(+)	0.182042	5.17225	-4.82845	0.0147443	0.0481658	Legumin 11S-globulin (AHRD V1 **-- Q39770_GINBI); contains Interpro domain(s) IPR014710 RmlC-like jelly roll fold	AT2G28680	73.88	0	NA	RmlC-like cupins superfamily protein;RmlC-like cupins superfamily protein;RmlC-like cupins superfamily protein	Cupin_1 Cupin
	Down	Down	Cla016358	Chr9:9589567_9590820(-)	10.9959	57.2983	-2.38153	0.000614836	0.0146701	Legumin-like protein (AHRD V1 **-- B6TDD3_MAIZE); contains Interpro domain(s) IPR014710 RmlC-like jelly roll fold	AT2G28680	75.56	0	NA	RmlC-like cupins superfamily protein;RmlC-like cupins superfamily protein;RmlC-like cupins superfamily protein	Cupin_1 Cupin
	Up		Cla018222	Chr4:19943286_19948224(+)	11.0922	5.32798	1.05789	0.00340313	0.0249647	Unknown Protein (AHRD V1)	AT2G28780	36.85	2e-159	NA	P-hydroxybenzoic acid efflux pump subunit;fusaric acid resistance family protein	FUSC_2 Fusaric acid resistance protein-like; FUSC Fusaric acid resistance protein family
	Down		Cla012139	Chr4:15734543_15735046(-)	5.62413	13.505	-1.2638	0.0110066	0.0414168	B3 domain-containing protein At1g05920 (AHRD V1 ***- Y1592_ARATH)	AT2G31460	29.66	3e-07	NA	B3 domain protein (DUF313);B3 domain protein%2C putative (DUF313)	DUF313 Domain of unknown function (DUF313)
	Up		Cla009403	Chr6:6674296_6677543(-)	63.9949	24.3892	1.39171	0.00636168	0.0319327	Pyrimidine 5&apos-nucleotidase (AHRD V1 **-- D9QG58_BRESC); contains Interpro domain(s) IPR010237 Pyrimidine 5-nucleotidase	AT2G32150	60.77	2e-111	NA	Haloacid dehalogenase-like hydrolase (HAD) superfamily protein;Haloacid dehalogenase-like hydrolase (HAD) superfamily protein;Haloacid dehalogenase-like hydrolase (HAD) superfamily protein	HAD_2 Haloacid dehalogenase-like hydrolase; Hydrolase_like HAD-hyrolase-like
	Down		Cla009404	Chr6:6687405_6694182(-)	0.916526	8.10691	-3.1449	0.000492619	0.0138562	Pyrimidine 5&apos-nucleotidase (AHRD V1 ***- B0T131_CAUSK); contains Interpro domain(s) IPR010237 Pyrimidine 5-nucleotidase	AT2G32150	60.94	2e-102	NA	Haloacid dehalogenase-like hydrolase (HAD) superfamily protein;Haloacid dehalogenase-like hydrolase (HAD) superfamily protein;Haloacid dehalogenase-like hydrolase (HAD) superfamily protein	HAD_2 Haloacid dehalogenase-like hydrolase; Hydrolase haloacid dehalogenase-like hydrolase
	Down		Cla007682	Chr2:318851_319600(-)	1.36928	5.1222	-1.90335	0.000569651	0.0143486	Polyubiquitin (AHRD V1 ***- Q84JH0_BIGNA); contains Interpro domain(s) IPR000626 Ubiquitin	AT2G32350	51.85	1e-84	NA	Ubiquitin-like superfamily protein;Ubiquitin-like superfamily protein;ubiquitin 11	ubiquitin Ubiquitin family; Ubiquitin_2 Ubiquitin-like domain
	Down		Cla007681	Chr2:317320_317631(+)	0	3.98843	#NAME?	0.000552957	0.014211	Unknown Protein (AHRD V1); contains Interpro domain(s) IPR019955 Ubiquitin supergroup	AT2G32360	39.74	3e-11	NA	Ubiquitin-like superfamily protein	No hits detected that satisfy reporting thresholds
	Down		Cla019688	Chr3:8553262_8556045(+)	5.97071	13.2277	-1.14759	0.0119598	0.0432098	Peroxidase 51 (AHRD V1 ***- B6UBB5_MAIZE); contains Interpro domain(s) IPR002016 Haem peroxidase, plant/fungal/bacterial	AT2G34060	64.41	2e-159	NA	Peroxidase superfamily protein;Peroxidase superfamily protein;Peroxidase superfamily protein	peroxidase Peroxidase
	Down	Down	Cla023322	Chr11:19619617_19622331(-)	4.55085	9.20676	-1.01656	0.00397376	0.0265491	Transport protein Sec61 alpha subunit (AHRD V1 ***- B7GD39_PHATC); contains Interpro domain(s) IPR002208 SecY protein	AT2G34250	90.72	0	NA	SecY protein transport family protein;SecY protein transport family protein;SecY protein transport family protein	SecY SecY translocase; Plug_translocon Plug domain of Sec61p
	Down		Cla009834	Chr1:33375927_33377124(-)	0.107557	4.35093	-5.33815	0.00114887	0.0175402	Protein phosphatase 2C-like protein (AHRD V1 ***- F4IIV2_ARATH); contains Interpro domain(s) IPR015655 Protein phosphatase 2C	AT2G34740	63.6	7e-106	NA	protein phosphatase 2C family protein;Protein phosphatase 2C family protein;Protein phosphatase 2C family protein	PP2C Protein phosphatase 2C
	Down		Cla009907	Chr1:33977817_33980882(+)	4.65723	11.3763	-1.28848	0.0104638	0.0403176	Protein neuralized (Fragment) (AHRD V1 *--- E2B4J8_HARSA); contains Interpro domain(s) IPR001841 Zinc finger, RING-type	AT2G34920	35.58	4e-83	NA	RING/U-box superfamily protein;RING/U-box superfamily protein;golgin family A protein	zf-C3HC4_3 Zinc finger, C3HC4 type (RING finger)
	Up		Cla013698	Chr8:17504968_17508809(+)	7.35827	2.70722	1.44255	0.00156243	0.0190182	Alpha/beta hydrolase (AHRD V1 ***- Q28LF5_JANSC); contains Interpro domain(s) IPR000073 Alpha/beta hydrolase fold-1	AT2G36290	55.59	6e-133	NA	alpha/beta-Hydrolases superfamily protein;alpha/beta-Hydrolases superfamily protein;alpha/beta-Hydrolases superfamily protein	Abhydrolase_6 Alpha/beta hydrolase family; Abhydrolase_1 alpha/beta hydrolase fold
	Up		Cla017829	Chr10:26514038_26516346(+)	11.0242	4.4389	1.3124	0.0107025	0.0407076	Peroxidase (AHRD V1 ***- C1KA92_POPTR); contains Interpro domain(s) IPR002016 Haem peroxidase, plant/fungal/bacterial	AT2G37130	76.88	5e-91	NA	Peroxidase superfamily protein;Peroxidase superfamily protein;Peroxidase superfamily protein	peroxidase Peroxidase
	Down		Cla020329	Chr5:30817499_30819291(-)	0.102931	2.15701	-4.38928	0.000585403	0.0144501	Prostamide/prostaglandin F synthase (AHRD V1 *--- PGFS_BOVIN)	AT2G37240	25.6	3e-09	NA	Thioredoxin superfamily protein	AhpC-TSA_2 AhpC/TSA antioxidant enzyme
	Up		Cla017486	Chr10:23113144_23114437(-)	59.0333	26.2232	1.17069	0.00246229	0.0223644	ABC transporter G family member 42 (AHRD V1 ***- F4JJF4_ARATH)	AT2G37280	55.19	6e-52	NA	No Hits	No hits detected that satisfy reporting thresholds
	Up		Cla017966	Chr10:27568517_27570422(+)	39.5863	16.9533	1.22344	0.0018345	0.0200623	MYB transcription factor (Fragment) (AHRD V1 **-* E7BJY5_MALDO); contains Interpro domain(s) IPR006447 Myb-like DNA-binding region, SHAQKYF class	AT2G38090	69.3	9e-101	NA	Duplicated homeodomain-like superfamily protein;Homeodomain-like transcriptional regulator;Duplicated homeodomain-like superfamily protein	Myb_DNA-binding Myb-like DNA-binding domain; Myb_DNA-bind_6 Myb-like DNA-binding domain
	Down		Cla004656	Chr9:31848695_31850966(-)	1.16994	4.47321	-1.93487	0.00290401	0.0237243	Os03g0859900 protein (Fragment) (AHRD V1 *--- Q0DLK3_ORYSJ); contains Interpro domain(s) IPR006869 Protein of unknown function DUF547	AT2G39690	52.8	2e-164	NA	ternary complex factor MIP1 leucine-zipper protein (Protein of unknown function%2C DUF547);ternary complex factor MIP1 leucine-zipper protein (Protein of unknown function%2C DUF547);ternary complex factor MIP1 leucine-zipper protein (Protein of unknown function%2C DUF547)	DUF547 Protein of unknown function, DUF547; Lzipper-MIP1 Leucine-zipper of ternary complex factor MIP1
	Up		Cla002878	Chr10:22334465_22336576(+)	11.1639	4.76018	1.22975	0.0013105	0.0182864	Amino acid transporter family protein (AHRD V1 ***- D7LGK0_ARALL); contains Interpro domain(s) IPR013057 Amino acid transporter, transmembrane	AT2G41190	55.52	4e-121	NA	Transmembrane amino acid transporter family protein;Transmembrane amino acid transporter family protein;Transmembrane amino acid transporter family protein	Aa_trans Transmembrane amino acid transporter protein
	Down		Cla002767	Chr4:469805_471558(+)	6.01326	12.1696	-1.01707	0.000672713	0.015172	Os01g0611000 protein (Fragment) (AHRD V1 ***- Q0JLB5_ORYSJ); contains Interpro domain(s) IPR006946 Protein of unknown function DUF642	AT2G41810	63.33	1e-157	NA	imidazolonepropionase (Protein of unknown function%2C DUF642);imidazolonepropionase (Protein of unknown function%2C DUF642);DNA-directed RNA polymerase subunit beta (Protein of unknown function%2C DUF642)	DUF642 Protein of unknown function (DUF642)
	Down		Cla008072	Chr4:2716446_2716634(+)	0.745989	37.7816	-5.66238	0.00230374	0.0218048	Unknown Protein (AHRD V1)	AT2G41905	53.97	7e-11	NA	transmembrane protein	No hits detected that satisfy reporting thresholds
	Down		Cla017262	Chr10:18088908_18089093(+)	2.40202	37.4529	-3.96276	0.00471104	0.0281786	Arabinogalactan peptide 23 (AHRD V1 -**- AGP23_ARATH)	AT2G41905	64.52	6e-17	NA	transmembrane protein;arabinogalactan protein 23	No hits detected that satisfy reporting thresholds
	Down		Cla017512	Chr10:23451559_23451750(-)	0.539268	14.5474	-4.75361	0.00387416	0.0263666	Unknown Protein (AHRD V1)	AT2G41905	52.38	6e-12	NA	transmembrane protein	No hits detected that satisfy reporting thresholds
	Down		Cla021739	Chr5:5800583_5801293(+)	0.102415	3.906	-5.25319	0.000741418	0.0155109	Unknown Protein (AHRD V1); contains Interpro domain(s) IPR010684 RNA polymerase II transcription factor SIII, subunit A	AT2G42780	33.33	5e-33	NA	transcription elongation factor B polypeptide;transcription elongation factor B polypeptide	Elongin_A RNA polymerase II transcription factor SIII (Elongin) subunit A
	Down		Cla015650	Chr2:2356409_2356822(+)	3.17952	18.7742	-2.56188	0.00069989	0.0152975	Calcium-binding EF-hand family protein-like (AHRD V1 **** Q6ZFI7_ORYSJ); contains Interpro domain(s) IPR011992 EF-Hand type	AT2G44310	45.59	2e-33	NA	Calcium-binding EF-hand family protein;Calcium-binding EF hand family protein;Calcium-binding EF-hand family protein	EF-hand_1 EF hand; EF-hand_6 EF-hand domain; EF-hand_5 EF hand; EF-hand_7 EF-hand domain pair; EF-hand_8 EF-hand domain pair
	Down		Cla004978	Chr1:1077661_1080088(-)	12.2719	31.9809	-1.38185	0.000584463	0.0144501	Zinc finger protein (AHRD V1 *--* B6UCK2_MAIZE); contains Interpro domain(s) IPR018957 Zinc finger, C3HC4 RING-type	AT2G45530	58.7	5e-73	NA	RING/U-box superfamily protein;RING/FYVE/PHD zinc finger superfamily protein;RING/FYVE/PHD zinc finger superfamily protein	RINGv RING-variant domain
	Down	Down	Cla021230	Chr5:1411616_1413767(+)	15.6216	34.3845	-1.13822	0.00111214	0.0173751	Unknown Protein (AHRD V1)	AT2G46000	56.91	3e-55	NA	LDL receptor wingless signaling/trafficking chaperone	Mesd Chaperone for wingless signalling and trafficking of LDL receptor
	Down		Cla013599	Chr2:27688176_27688502(-)	2.76368	12.5651	-2.18476	0.000792078	0.015643	Unknown Protein (AHRD V1)	AT2G46490	53.16	3e-24	NA	hypothetical protein;hypothetical protein	No hits detected that satisfy reporting thresholds
	Up		Cla006701	Chr6:3410173_3410547(+)	86.4261	42.6011	1.02058	0.00739463	0.0342283	Calmodulin-2 (AHRD V1 ***- A8NNF2_COPC7); contains Interpro domain(s) IPR011992 EF-Hand type	AT2G46600	66.37	1e-51	NA	Calcium-binding EF-hand family protein;Calcium-binding EF-hand family protein;pinoid-binding protein 1	EF-hand_8 EF-hand domain pair
	Down		Cla005176	Chr3:28357167_28363676(+)	1.65544	5.21699	-1.656	0.0155632	0.0496741	Kinesin (AHRD V1 ***- Q5MNW6_GOSHI); contains Interpro domain(s) IPR001752 Kinesin, motor region	AT2G47500	53.26	0	NA	P-loop nucleoside triphosphate hydrolases superfamily protein with CH (Calponin Homology) domain-containing protein;kinesin 4;P-loop nucleoside triphosphate hydrolases superfamily protein with CH (Calponin Homology) domain-containing protein	Kinesin Kinesin motor domain; Microtub_bd Microtubule binding; CH Calponin homology (CH) domain
	Up		Cla015063	Chr9:4599994_4602089(-)	73.2092	32.4898	1.17204	0.00213934	0.0212419	Universal stress protein family protein (AHRD V1 **** D7LHB6_ARALL); contains Interpro domain(s) IPR006016 UspA	AT2G47710	74.07	3e-82	NA	Adenine nucleotide alpha hydrolases-like superfamily protein;Adenine nucleotide alpha hydrolases-like superfamily protein;Adenine nucleotide alpha hydrolases-like superfamily protein	Usp Universal stress protein family
	Up		Cla015065	Chr9:4593362_4594941(-)	6.4608	1.83241	1.81797	0.0054767	0.0300231	Universal stress protein family protein (AHRD V1 **** A8IXL9_BRACM); contains Interpro domain(s) IPR006016 UspA	AT2G47710	59.88	4e-60	NA	Adenine nucleotide alpha hydrolases-like superfamily protein;Adenine nucleotide alpha hydrolases-like superfamily protein;Adenine nucleotide alpha hydrolases-like superfamily protein	Usp Universal stress protein family
	Down	Down	Cla014675	Chr9:4747702_4748516(+)	9.06435	101.684	-3.48774	5.77e-05	0.00976752	Glutathione S-transferase (AHRD V1 ***- Q8GT24_CUCMA); contains Interpro domain(s) IPR004046 Glutathione S-transferase, C-terminal	AT2G47730	54.76	2e-75	NA	glutathione S-transferase phi 8;glutathione S-transferase phi 8;glutathione S-transferase F3	GST_N Glutathione S-transferase, N-terminal domain; GST_C Glutathione S-transferase, C-terminal domain; GST_N_3 Glutathione S-transferase, N-terminal domain; GST_C_2 Glutathione S-transferase, C-terminal domain; GST_N_2 Glutathione S-transferase, N-terminal domain; GST_C_3 Glutathione S-transferase, C-terminal domain
	Up		Cla022624	Chr8:25152871_25153971(-)	31.3734	14.929	1.07142	0.000197608	0.0122767	U-box domain-containing protein 3 (AHRD V1 **-- A8MQL6_ARATH); contains Interpro domain(s) IPR011989 Armadillo-like helical	AT3G01400	81.1	0	NA	ARM repeat superfamily protein;ARM repeat superfamily protein;ARM repeat superfamily protein	Arm Armadillo/beta-catenin-like repeat; RICTOR_N Rapamycin-insensitive companion of mTOR, N-term
	Down		Cla010409	Chr9:31358651_31359139(+)	1.72246	8.50747	-2.30426	0.00041309	0.0134838	Unknown Protein (AHRD V1)	AT3G01516	43.95	2e-30	NA	transmembrane protein;transmembrane protein;transmembrane protein	No hits detected that satisfy reporting thresholds
	Up		Cla004075	Chr5:17750117_17753281(+)	31.097	14.8046	1.07073	0.000134356	0.0107871	Sua5/YciO/YrdC/YwlC (AHRD V1 ***- Q4CAL2_CROWT); contains Interpro domain(s) IPR004388 Sua5/YciO/YrdC/YwlC	AT3G01920	67.83	3e-139	NA	DHBP synthase RibB-like alpha/beta domain-containing protein;DHBP synthase RibB-like alpha/beta domain-containing protein;DHBP synthase RibB-like alpha/beta domain-containing protein	Sua5_yciO_yrdC Telomere recombination
	Down	Down	Cla016524	Chr11:22218319_22219677(-)	2.11836	48.3228	-4.51168	0.000519668	0.0139787	UDP-glycosyltransferase (AHRD V1 ***- D7KLQ4_ARALL); contains Interpro domain(s) IPR002213 UDP-glucuronosyl/UDP-glucosyltransferase	AT3G02100	37.55	6e-98	NA	UDP-Glycosyltransferase superfamily protein;UDP-Glycosyltransferase superfamily protein;UDP-glucosyl transferase 85A2	UDPGT UDP-glucoronosyl and UDP-glucosyl transferase
	Down		Cla016525	Chr11:22222364_22224014(+)	0.505456	9.13049	-4.17503	0.0010402	0.0169914	UDP-glycosyltransferase (AHRD V1 ***- D7KLQ4_ARALL); contains Interpro domain(s) IPR002213 UDP-glucuronosyl/UDP-glucosyltransferase	AT3G02100	48.6	1e-155	NA	UDP-Glycosyltransferase superfamily protein;UDP-Glycosyltransferase superfamily protein;UDP-Glycosyltransferase superfamily protein	UDPGT UDP-glucoronosyl and UDP-glucosyl transferase
	Down		Cla019039	Chr6:24549658_24551128(-)	4.30497	12.7819	-1.57003	0.000927592	0.0163269	Universal stress protein family protein (AHRD V1 **** D7KWY1_ARALL); contains Interpro domain(s) IPR006016 UspA	AT3G03290	52.3	3e-60	NA	Adenine nucleotide alpha hydrolases-like superfamily protein;Adenine nucleotide alpha hydrolases-like superfamily protein;Adenine nucleotide alpha hydrolases-like superfamily protein	Usp Universal stress protein family
	Down		Cla013673	Chr8:17745305_17749467(+)	33.2905	83.8456	-1.33262	0.000214743	0.012665	Receptor-like kinase 17 (AHRD V1 **** A5A0Y6_SOLCH); contains Interpro domain(s) IPR002290 Serine/threonine protein kinase	AT3G03770	50.76	0	NA	Leucine-rich repeat protein kinase family protein;Leucine-rich repeat protein kinase family protein;Leucine-rich repeat protein kinase family protein	Pkinase Protein kinase domain; Pkinase_Tyr Protein tyrosine kinase; LRR_8 Leucine rich repeat; LRR_4 Leucine Rich repeats (2 copies)
	Down		Cla010492	Chr2:11773499_11775984(+)	6.1089	13.8519	-1.1811	0.0011661	0.0176287	Syntaxin 1B (AHRD V1 ***- Q9I9P6_DANRE); contains Interpro domain(s) IPR010989 t-SNARE	AT3G03800	55.94	9e-97	NA	syntaxin of plants 131;syntaxin of plants 131;syntaxin of plants 132	Syntaxin Syntaxin; SNARE SNARE domain
	Down		Cla005213	Chr3:28048322_28050260(+)	0.00763533	2.09241	-8.09826	0.00201245	0.0208263	Pectinesterase (AHRD V1 **** B9RFE0_RICCO); contains Interpro domain(s) IPR000070 Pectinesterase, catalytic	AT3G05610	54.37	0	NA	Plant invertase/pectin methylesterase inhibitor superfamily;Plant invertase/pectin methylesterase inhibitor superfamily;Plant invertase/pectin methylesterase inhibitor superfamily	Pectinesterase Pectinesterase; PMEI Plant invertase/pectin methylesterase inhibitor
	Down		Cla009288	Chr6:5360491_5362192(+)	0.761666	20.4474	-4.74661	0.00364537	0.0256922	Pectinesterase (AHRD V1 **** F6H6V9_VITVI); contains Interpro domain(s) IPR000070 Pectinesterase, catalytic	AT3G05610	50.17	0	NA	Plant invertase/pectin methylesterase inhibitor superfamily;Plant invertase/pectin methylesterase inhibitor superfamily;Plant invertase/pectin methylesterase inhibitor superfamily	Pectinesterase Pectinesterase; PMEI Plant invertase/pectin methylesterase inhibitor
	Up		Cla000937	Chr8:12717953_12718252(-)	5.5426	2.10526	1.39657	0.00467588	0.0281295	Unknown Protein (AHRD V1)	AT3G05858	51.65	1e-18	NA	hypothetical protein;hypothetical protein	No hits detected that satisfy reporting thresholds
	Down		Cla005236	Chr3:27862675_27863779(-)	2.74503	32.1886	-3.55166	0.000632323	0.0148531	Uncharacterized GPI-anchored protein At3g06035 (AHRD V1 ***- UGPI4_ARATH)	AT3G06035	37.06	5e-36	NA	Glycoprotein membrane precursor GPI-anchored;Glycoprotein membrane precursor GPI-anchored;Glycoprotein membrane precursor GPI-anchored	No hits detected that satisfy reporting thresholds
	Down		Cla012557	Chr7:24062342_24062922(+)	3.17436	7.80804	-1.2985	0.0104112	0.0402156	Unknown Protein (AHRD V1)	AT3G06840	28.42	7e-06	NA	hypothetical protein	No hits detected that satisfy reporting thresholds
	Up		Cla014919	Chr9:7622717_7625525(-)	77.2071	37.9161	1.02592	0.00097515	0.0165911	mRNA clone RTFL01-13-K15 (AHRD V1 **-- E4MX37_THEHA); contains Interpro domain(s) IPR008479 Protein of unknown function DUF760	AT3G07310	53.28	6e-129	NA	phosphoserine aminotransferase%2C putative (DUF760);phosphoserine aminotransferase%2C putative (DUF760);phosphoserine aminotransferase%2C putative (DUF760)	DUF760 Protein of unknown function (DUF760)
	Up		Cla014908	Chr9:7492723_7493643(-)	12.053	4.99962	1.2695	0.00956363	0.0385251	Plant-specific domain TIGR01615 family protein (AHRD V1 ***- B6UDN7_MAIZE); contains Interpro domain(s) IPR006502 Protein of unknown function DUF506, plant	AT3G07350	47.32	3e-85	NA	sulfate/thiosulfate import ATP-binding protein%2C putative (DUF506);sulfate/thiosulfate import ATP-binding protein%2C putative (DUF506);phosphoenolpyruvate carboxylase%2C putative (DUF506)	PDDEXK_6 PDDEXK-like family of unknown function
	Down		Cla015220	Chr9:3419842_3420330(-)	42.643	4353.79	-6.67382	0.011394	0.0422522	Protease inhibitor/seed storage/lipid transfer protein family protein (AHRD V1 ***- D7LU28_ARALL); contains Interpro domain(s) IPR003612 Plant lipid transfer protein/seed storage/trypsin-alpha amylase inhibitor	AT3G07450	45.63	9e-27	NA	Bifunctional inhibitor/lipid-transfer protein/seed storage 2S albumin superfamily protein;Bifunctional inhibitor/lipid-transfer protein/seed storage 2S albumin superfamily protein;Bifunctional inhibitor/lipid-transfer protein/seed storage 2S albumin superfamily protein	LTP_2 Probable lipid transfer
	Down	Down	Cla017250	Chr10:18192327_18192659(-)	50.3761	3426.54	-6.08787	0.0138731	0.0466979	Protease inhibitor/seed storage/lipid transfer protein family protein (AHRD V1 ***- D7L6K8_ARALL); contains Interpro domain(s) IPR003612 Plant lipid transfer protein/seed storage/trypsin-alpha amylase inhibitor	AT3G07450	55.32	5e-32	NA	Bifunctional inhibitor/lipid-transfer protein/seed storage 2S albumin superfamily protein;Bifunctional inhibitor/lipid-transfer protein/seed storage 2S albumin superfamily protein;Bifunctional inhibitor/lipid-transfer protein/seed storage 2S albumin superfamily protein	LTP_2 Probable lipid transfer
	Down		Cla018167	Chr4:19335160_19335579(-)	0.647862	3.20745	-2.30767	0.00737099	0.0342042	Unknown Protein (AHRD V1)	AT3G09280	41.24	4e-14	NA	transmembrane protein	No hits detected that satisfy reporting thresholds
	Down		Cla014392	Chr1:30440411_30440704(-)	3.54798	90.0834	-4.66619	2.19e-05	0.00881891	Unknown Protein (AHRD V1)	AT3G09950	61.54	3e-21	NA	hypothetical protein;hypothetical protein;cytoplasmic tRNA 2-thiolation protein	No hits detected that satisfy reporting thresholds
	Down		Cla013661	Chr8:17890613_17894199(+)	1.45466	3.58237	-1.30023	0.00171276	0.0196106	Calcium dependent protein kinase 1 (AHRD V1 **** C9WVP4_GOSHI); contains Interpro domain(s) IPR002290 Serine/threonine protein kinase	AT3G10660	36.42	3e-73	NA	calmodulin-domain protein kinase cdpk isoform 2;calmodulin-domain protein kinase cdpk isoform 2;calcium-dependent protein kinase 6	Pkinase Protein kinase domain; Pkinase_Tyr Protein tyrosine kinase; EF-hand_7 EF-hand domain pair; EF-hand_6 EF-hand domain; EF-hand_1 EF hand; EF-hand_5 EF hand; EF-hand_8 EF-hand domain pair
	Up		Cla017987	Chr10:27763490_27765491(+)	31.0765	4.70353	2.72401	0.000338445	0.0130342	Isoamyl acetate-hydrolyzing esterase (AHRD V1 **-- E5GBF6_CUCME); contains Interpro domain(s) IPR013831 Esterase, SGNH hydrolase-type, subgroup	AT3G11210	60.94	5e-102	NA	SGNH hydrolase-type esterase superfamily protein;SGNH hydrolase-type esterase superfamily protein;SGNH hydrolase-type esterase superfamily protein	Lipase_GDSL_2 GDSL-like Lipase/Acylhydrolase family; Lipase_GDSL GDSL-like Lipase/Acylhydrolase
	Down		Cla020471	Chr5:29580918_29585263(-)	2.24796	10.157	-2.17578	0.000407587	0.0134838	SYNC1 protein (AHRD V1 *-*- Q8W4Q2_ARATH)	AT3G11760	63.33	1e-15	NA	structural maintenance of chromosomes flexible hinge domain protein;splicing factor 3A subunit;splicing factor 3A subunit	NT-C2 N-terminal C2 in EEIG1 and EHBP1 proteins
	Up		Cla010971	Chr1:18619453_18620169(-)	5.05983	2.08279	1.28057	0.00400753	0.0266004	Unknown Protein (AHRD V1)	AT3G13130	32.87	2e-14	NA	transmembrane protein	No hits detected that satisfy reporting thresholds
	Up		Cla015519	Chr9:825896_834237(-)	3.70744	0.926475	2.0006	0.0003775	0.0133817	Polyphosphoinositide phosphatase (AHRD V1 *-*- F4W5F5_ACREC); contains Interpro domain(s) IPR002013 Synaptojanin, N-terminal	AT3G14205	47.22	7e-136	NA	Phosphoinositide phosphatase family protein;Phosphoinositide phosphatase family protein;Phosphoinositide phosphatase family protein	Syja_N SacI homology domain
	Down		Cla015257	Chr9:3116792_3119902(+)	1.56229	3.8036	-1.2837	0.00282287	0.0235296	Cc-nbs-lrr resistance protein (AHRD V1 ***- B9HBI6_POPTR); contains Interpro domain(s) IPR002182 NB-ARC	AT3G14470	30.27	2e-139	NA	NB-ARC domain-containing disease resistance protein;NB-ARC domain-containing disease resistance protein;LRR and NB-ARC domains-containing disease resistance protein	NB-ARC NB-ARC domain; Rx_N Rx N-terminal domain; LRR_8 Leucine rich repeat
	Down		Cla023371	Chr11:20067987_20068739(-)	2.56474	9.4045	-1.87454	0.00281947	0.0235296	Unknown Protein (AHRD V1)	AT3G15250	31.47	3e-15	NA	TPRXL;membrane-associated kinase regulator	No hits detected that satisfy reporting thresholds
	Up		Cla023383	Chr11:20206643_20208486(+)	7.56368	3.62713	1.06026	0.00174164	0.0197326	Beta-1,3-galactosyl-O-glycosyl-glycoprotein beta-1,6-N-acetylglucosaminyltransferase (AHRD V1 *--- GCNT3_BHV4L); contains Interpro domain(s) IPR003406 Glycosyl transferase, family 14	AT3G15350	73.36	0	NA	Core-2/I-branching beta-1%2C6-N-acetylglucosaminyltransferase family protein;Core-2/I-branching beta-1%2C6-N-acetylglucosaminyltransferase family protein;Core-2/I-branching beta-1%2C6-N-acetylglucosaminyltransferase family protein	Branch Core-2/I-Branching enzyme
	Down		Cla010344	Chr9:30631710_30635272(+)	0.0150567	2.20219	-7.19239	0.00105908	0.0170355	Polygalacturonase-like protein (AHRD V1 **-- Q9FLE3_ARATH); contains Interpro domain(s) IPR012334 Pectin lyase fold	AT3G15720	38.98	3e-73	NA	Pectin lyase-like superfamily protein;Pectin lyase-like superfamily protein;Pectin lyase-like superfamily protein	Glyco_hydro_28 Glycosyl hydrolases family 28
	Up		Cla021800	Chr5:6317990_6321481(-)	12.8896	5.20011	1.30959	0.0106629	0.040641	Pectinesterase (AHRD V1 ***- C6TJY2_SOYBN); contains Interpro domain(s) IPR000070 Pectinesterase, catalytic	AT3G17060	67.77	1e-170	NA	Pectin lyase-like superfamily protein;Pectin lyase-like superfamily protein;Pectin lyase-like superfamily protein	Pectinesterase Pectinesterase
	Up		Cla005889	Chr1:7887941_7889501(-)	3.68878	0.851766	2.11461	0.00046241	0.0138562	TRAF-like family protein (AHRD V1 **-- F4J556_ARATH); contains Interpro domain(s) IPR002083 MATH	AT3G17380	35.27	6e-39	NA	TRAF-like family protein;TRAF-like family protein;TRAF-like family protein	MATH MATH domain
	Up		Cla018650	Chr4:23978653_23979292(+)	28.0022	13.5872	1.04329	0.00503465	0.0289896	Cyclic nucleotide-gated channel (AHRD V1 ***- B9NG39_POPTR)	AT3G17700	38.18	5e-24	NA	cyclic nucleotide-binding transporter 1;cyclic nucleotide-binding transporter 1	No hits detected that satisfy reporting thresholds
	Down		Cla018918	Chr6:23488217_23490211(+)	35.0543	73.3997	-1.06618	0.00417295	0.0270217	Aldose 1-epimerase family protein (AHRD V1 ***- D7L7Y1_ARALL); contains Interpro domain(s) IPR015443 Aldose-1-epimerase	AT3G17940	68.62	2e-163	NA	Galactose mutarotase-like superfamily protein;Galactose mutarotase-like superfamily protein;Galactose mutarotase-like superfamily protein	Aldose_epim Aldose 1-epimerase
	Down	Down	Cla018997	Chr6:24231070_24231522(+)	1.16793	5.71646	-2.29117	0.00151758	0.0189334	Oleosin Bn-V (AHRD V1 ***- B6UIA7_MAIZE); contains Interpro domain(s) IPR000136 Oleosin	AT3G18570	55.32	2e-45	NA	Oleosin family protein;Oleosin family protein;Oleosin family protein	Oleosin Oleosin
	Up		Cla016070	Chr2:7109695_7110881(-)	4.33605	0.62021	2.80555	0.0105876	0.0404914	BHLH transcription factor-like protein (AHRD V1 *-*- Q5ZAK6_ORYSJ); contains Interpro domain(s) IPR011598 Helix-loop-helix DNA-binding	AT3G19500	40.39	2e-39	NA	basic helix-loop-helix (bHLH) DNA-binding superfamily protein;basic helix-loop-helix (bHLH) DNA-binding superfamily protein;basic helix-loop-helix (bHLH) DNA-binding superfamily protein	No hits detected that satisfy reporting thresholds
	Down	Down	Cla009756	Chr1:32619772_32622765(-)	0.581055	10.7462	-4.20901	0.00570583	0.0303707	Beta-1 4-xylosidase (AHRD V1 ***- D7LA14_ARALL); contains Interpro domain(s) IPR001764 Glycoside hydrolase, family 3, N-terminal	AT3G19620	52.32	0	NA	Glycosyl hydrolase family protein;beta-D-xylosidase 4;beta-xylosidase 2	Glyco_hydro_3_C Glycosyl hydrolase family 3 C-terminal domain; Glyco_hydro_3 Glycosyl hydrolase family 3 N terminal domain; Fn3-like Fibronectin type III-like domain
	Down		Cla020038	Chr2:24575316_24575741(-)	3.72588	7.54181	-1.01733	0.0069752	0.0333202	Aspartyl protease family protein (AHRD V1 ***- Q9LHE3_ARATH)	AT3G20015	33.33	5e-11	NA	Eukaryotic aspartyl protease family protein	No hits detected that satisfy reporting thresholds
	Up		Cla008530	Chr2:33429573_33430670(-)	61.6871	22.2645	1.47022	0.00242459	0.0222354	Leucine-rich repeat receptor-like kinase (AHRD V1 **-- F2WB30_9ROSI); contains Interpro domain(s) IPR013210 Leucine-rich repeat, N-terminal	AT3G20820	74.79	0	NA	Leucine-rich repeat (LRR) family protein;Leucine-rich repeat (LRR) family protein;Leucine-rich repeat (LRR) family protein	LRR_8 Leucine rich repeat; LRR_1 Leucine Rich Repeat; LRR_4 Leucine Rich repeats (2 copies); LRRNT_2 Leucine rich repeat N-terminal domain; LRR_6 Leucine Rich repeat
	Up		Cla012633	Chr7:24781440_24783192(+)	4.00364	1.4563	1.459	0.00248578	0.02238	BHLH transcription factor-like (AHRD V1 *-*- Q8S0N2_ORYSJ); contains Interpro domain(s) IPR011598 Helix-loop-helix DNA-binding	AT3G21330	56.76	1e-43	NA	basic helix-loop-helix (bHLH) DNA-binding superfamily protein;basic helix-loop-helix (bHLH) DNA-binding superfamily protein;basic helix-loop-helix (bHLH) DNA-binding superfamily protein	No hits detected that satisfy reporting thresholds
	Down		Cla010475	Chr2:11284335_11284775(-)	18.7968	40.499	-1.1074	0.000541274	0.0140675	Unknown Protein (AHRD V1)	AT3G21680	31.25	3e-07	NA	hypothetical protein	DUF4228 Domain of unknown function (DUF4228)
	Up		Cla007697	Chr2:422591_423556(-)	12.0103	0.93456	3.68384	0.000263501	0.012665	Transcription factor (BHLH)-like protein (AHRD V1 *--- Q6ZIP1_ORYSJ); contains Interpro domain(s) IPR001092 Basic helix-loop-helix dimerisation region bHLH	AT3G22100	48.57	8e-26	NA	basic helix-loop-helix (bHLH) DNA-binding superfamily protein;transcription factor bHLH140-like protein	HLH Helix-loop-helix DNA-binding domain
	Up		Cla021587	Chr5:4451941_4454816(+)	14.9849	4.22313	1.82713	0.000556719	0.014235	DNA repair and recombination protein radA (AHRD V1 **-* RADA_PYRFU); contains Interpro domain(s) IPR016467 DNA repair and recombination, RecA-like	AT3G22880	72.73	9e-165	NA	DNA repair (Rad51) family protein;DNA repair (Rad51) family protein;RAS associated with diabetes protein 51	Rad51 Rad51
	Up		Cla018189	Chr4:19609862_19611367(+)	4.07963	1.65564	1.30105	0.000415356	0.0134838	Os03g0270500 protein (Fragment) (AHRD V1 *-*- Q0DT39_ORYSJ); contains Interpro domain(s) IPR007700 Protein of unknown function DUF668	AT3G23160	35.12	5e-79	NA	plant/protein (DUF668);hypothetical protein (DUF668);hypothetical protein (DUF668)	DUF668 Protein of unknown function (DUF668); DUF3475 Domain of unknown function (DUF3475)
	Up		Cla020341	Chr5:30690909_30692072(-)	23.2588	11.516	1.01414	0.00873012	0.0372156	Unknown Protein (AHRD V1)	AT3G25590	36.38	7e-52	NA	micronuclear linker histone polyprotein-like protein	No hits detected that satisfy reporting thresholds
	Down		Cla020354	Chr5:30562060_30562851(-)	1.15154	3.73058	-1.69583	0.00297773	0.0238011	Plant-specific domain TIGR01570 family protein (AHRD V1 ***- B6U2A5_MAIZE); contains Interpro domain(s) IPR006460 Protein of unknown function DUF617, plant	AT3G25640	68.75	4e-77	NA	MIZU-KUSSEI-like protein (Protein of unknown function%2C DUF617);MIZU-KUSSEI-like protein (Protein of unknown function%2C DUF617);MIZU-KUSSEI-like protein (Protein of unknown function%2C DUF617)	DUF617 Protein of unknown function, DUF617
	Down		Cla011403	Chr1:1997513_1999270(-)	0.00637867	10.3984	-10.6708	0.000562249	0.0142597	Cellulase family protein (AHRD V1 **-- E9EEN0_METAQ); contains Interpro domain(s) IPR001547 Glycoside hydrolase, family 5	AT3G26130	39.78	3e-125	NA	Cellulase (glycosyl hydrolase family 5) protein;Cellulase (glycosyl hydrolase family 5) protein;Cellulase (glycosyl hydrolase family 5) protein	Cellulase Cellulase (glycosyl hydrolase family 5)
	Down		Cla011397	Chr1:1969823_1971571(+)	0.00538	10.3829	-10.9143	0.00126508	0.01811	Cellulase (Glycosyl hydrolase family 5) protein (AHRD V1 **-- Q9LTM8_ARATH); contains Interpro domain(s) IPR001547 Glycoside hydrolase, family 5	AT3G26140	37.6	8e-121	NA	Cellulase (glycosyl hydrolase family 5) protein;Cellulase (glycosyl hydrolase family 5) protein;Cellulase (glycosyl hydrolase family 5) protein	Cellulase Cellulase (glycosyl hydrolase family 5)
	Down		Cla017055	Chr10:20523007_20523685(+)	4.41792	10.0724	-1.18896	0.0122168	0.0437186	AN1-type zinc finger protein 2B (AHRD V1 **** B4FVR8_MAIZE); contains Interpro domain(s) IPR000058 Zinc finger, AN1-type	AT3G28210	61.76	6e-71	NA	zinc finger (AN1-like) family protein;zinc finger (AN1-like) family protein;zinc finger (C2H2 type%2C AN1-like) family protein	zf-AN1 AN1-like Zinc finger
	Down		Cla010361	Chr9:30842124_30842549(+)	4.27812	14.701	-1.78087	0.0124204	0.0441092	Unknown Protein (AHRD V1)	AT3G28420	32.93	6e-15	NA	Putative membrane lipoprotein	No hits detected that satisfy reporting thresholds
	Down		Cla016992	Chr10:21264039_21264632(-)	0.67099	12.1898	-4.18324	0.00714018	0.0336908	Calmodulin-like protein (AHRD V1 *-*- B6TXW9_MAIZE); contains Interpro domain(s) IPR011992 EF-Hand type	AT3G29000	50.86	2e-29	NA	Calcium-binding EF-hand family protein;Calcium-binding EF-hand family protein;Calcium-binding EF-hand family protein	EF-hand_1 EF hand; EF-hand_6 EF-hand domain; EF-hand_5 EF hand; EF-hand_7 EF-hand domain pair; EF-hand_8 EF-hand domain pair
	Down		Cla017353	Chr10:16870813_16871652(-)	0.813199	3.52057	-2.11413	0.00800111	0.0357719	Invertase/pectin methylesterase inhibitor family protein (AHRD V1 *-*- D7LGM0_ARALL); contains Interpro domain(s) IPR006501 Pectinesterase inhibitor	AT3G36659	29.84	4e-14	NA	Plant invertase/pectin methylesterase inhibitor superfamily protein;Plant invertase/pectin methylesterase inhibitor superfamily protein;Plant invertase/pectin methylesterase inhibitor superfamily protein	PMEI Plant invertase/pectin methylesterase inhibitor
	Down		Cla010277	Chr9:29783880_29787359(-)	2.15717	6.69204	-1.6333	0.0026507	0.0230015	Expp1 protein (AHRD V1 ***- Q2HPL4_SOLTU)	AT3G44150	55.37	1e-95	NA	Expp1 protein;CSL zinc finger domain-containing protein;Expp1 protein	No hits detected that satisfy reporting thresholds
	Down		Cla003829	Chr10:7287575_7290344(+)	1.81448	14.7981	-3.02778	0.000111781	0.0105099	Pectinesterase (AHRD V1 **** B9R9R4_RICCO); contains Interpro domain(s) IPR000070 Pectinesterase, catalytic	AT3G47400	59	0	NA	Plant invertase/pectin methylesterase inhibitor superfamily;Plant invertase/pectin methylesterase inhibitor superfamily;Plant invertase/pectin methylesterase inhibitor superfamily	Pectinesterase Pectinesterase; PMEI Plant invertase/pectin methylesterase inhibitor
	Down		Cla019123	Chr6:25262183_25263676(-)	2.51993	7.84409	-1.63822	0.00161619	0.0191557	Aldose 1-epimerase-like protein (AHRD V1 ***- Q8LFH1_ARATH); contains Interpro domain(s) IPR015443 Aldose-1-epimerase	AT3G47800	63.37	1e-165	NA	Galactose mutarotase-like superfamily protein;Galactose mutarotase-like superfamily protein;Galactose mutarotase-like superfamily protein	Aldose_epim Aldose 1-epimerase
	Down		Cla008916	Chr10:1757747_1758160(+)	1.15989	100.993	-6.44412	0.00106828	0.0170704	RING finger protein 13 (AHRD V1 *--- E1ZWF2_CAMFO); contains Interpro domain(s) IPR018957 Zinc finger, C3HC4 RING-type	AT3G51325	47.44	4e-15	NA	RING/U-box superfamily protein;RING/U-box superfamily protein	zf-RING_2 Ring finger domain; zf-rbx1 RING-H2 zinc finger domain; zf-RING_11 RING-like zinc finger
	Up		Cla010476	Chr2:11318620_11319466(+)	5.56243	1.5805	1.81533	0.00553383	0.0300611	High mobility group protein (AHRD V1 ***- O49948_SOLTU); contains Interpro domain(s) IPR000910 High mobility group, HMG1/HMG2	AT3G51880	42.98	1e-17	NA	high mobility group B1;high mobility group B1;high mobility group B1	HMG_box HMG (high mobility group) box
	Down		Cla018361	Chr4:21242282_21257426(-)	17.754	47.7021	-1.42591	0.000521129	0.0139787	Pyruvate kinase (AHRD V1 ***- Q94KE3_ARATH); contains Interpro domain(s) IPR001697 Pyruvate kinase	AT3G52990	83.87	0	NA	Pyruvate kinase family protein;Pyruvate kinase family protein;Pyruvate kinase family protein	PK Pyruvate kinase, barrel domain; PK_C Pyruvate kinase, alpha/beta domain
	Up		Cla017943	Chr10:27424254_27425699(+)	17.4184	2.33662	2.89811	0.00251441	0.0224978	Unknown Protein (AHRD V1)	AT3G54000	30.95	3e-28	NA	TIP41-like protein;TIP41-like protein;TIP41-like protein	No hits detected that satisfy reporting thresholds
	Down		Cla013958	Chr8:14237450_14239066(-)	0.0506617	8.86984	-7.45187	7.5e-05	0.00987827	Phosphate transporter (AHRD V1 ***- Q9AYT3_TOBAC); contains Interpro domain(s) IPR004738 Phosphate permease	AT3G54700	73.19	0	NA	phosphate transporter 1%3B7;phosphate transporter 1%3B7;phosphate transporter 1%3B4	Sugar_tr Sugar (and other) transporter; MFS_1 Major Facilitator Superfamily
	Down	Down	Cla004657	Chr9:31854536_31856055(-)	15.2947	56.4107	-1.88293	0.00116216	0.0175864	. phloem protein 2 (AHRD V1 **-- Q4JHJ1_CUCMO); contains Interpro domain(s) IPR018029 C2 membrane targeting protein	AT3G55470	58.17	3e-63	NA	Calcium-dependent lipid-binding (CaLB domain) family protein;Calcium-dependent lipid-binding (CaLB domain) family protein;Calcium-dependent lipid-binding (CaLB domain) family protein	C2 C2 domain
	Down		Cla006548	Chr11:1212285_1212488(-)	0.881056	488.227	-9.1141	0.0009831	0.0165911	Unknown Protein (AHRD V1)	AT3G55570	61.19	2e-23	NA	cytoplasmic tRNA 2-thiolation protein;hypothetical protein;hypothetical protein	No hits detected that satisfy reporting thresholds
	Up		Cla007263	Chr7:5838223_5839252(+)	42.8028	21.2498	1.01025	0.00299594	0.023816	Amino acid transporter (AHRD V1 ***- B9HYI5_POPTR); contains Interpro domain(s) IPR013057 Amino acid transporter, transmembrane	AT3G56200	45.11	3e-52	NA	Transmembrane amino acid transporter family protein;Transmembrane amino acid transporter family protein;Transmembrane amino acid transporter family protein	Aa_trans Transmembrane amino acid transporter protein; Trp_Tyr_perm Tryptophan/tyrosine permease family
	Down	Down	Cla002890	Chr10:22164121_22166945(+)	59.3848	356.62	-2.58622	0.00223559	0.021532	Strictosidine synthase family protein (AHRD V1 **-- D7LVM7_ARALL); contains Interpro domain(s) IPR004141 Strictosidine synthase	AT3G57030	65.43	2e-179	NA	Calcium-dependent phosphotriesterase superfamily protein;strictosidine synthase-like 3;Calcium-dependent phosphotriesterase superfamily protein	Str_synth Strictosidine synthase; SGL SMP-30/Gluconolactonase/LRE-like region
	Up		Cla002768	Chr4:472242_474128(-)	3.78886	0.563981	2.74805	0.00211518	0.0211425	Unknown Protein (AHRD V1)	AT3G57440	39.36	7e-25	NA	hypothetical protein;hypothetical protein	No hits detected that satisfy reporting thresholds
	Down		Cla010426	Chr9:31475568_31475828(-)	23.8045	55.9613	-1.23319	0.00187955	0.0202707	Unknown Protein (AHRD V1)	AT3G57950	51.32	2e-17	NA	cotton fiber protein;cotton fiber protein;cotton fiber protein	DUF761 Cotton fibre expressed protein
	Up		Cla008525	Chr2:33468579_33471312(+)	3.42323	1.49522	1.195	0.00258466	0.0228039	DNA-binding bromodomain-containing protein (AHRD V1 **** Q9M2Q0_ARATH); contains Interpro domain(s) IPR001487 Bromodomain	AT3G57980	35.45	2e-70	NA	DNA-binding bromodomain-containing protein;DNA-binding bromodomain-containing protein;DNA-binding bromodomain-containing protein	Bromodomain Bromodomain; Myb_DNA-binding Myb-like DNA-binding domain
	Down		Cla002238	Chr7:1026107_1027793(+)	9.72153	20.7131	-1.09129	0.00456886	0.0280081	Protein binding / ubiquitin-protein ligase/ zinc ion binding (AHRD V1 *--* D8LG18_ECTSI); contains Interpro domain(s) IPR018957 Zinc finger, C3HC4 RING-type	AT3G58720	38.22	3e-38	NA	RING/U-box superfamily protein;RING/U-box superfamily protein;RING/U-box superfamily protein	zf-RING_2 Ring finger domain; zf-RING_11 RING-like zinc finger; zf-C3HC4_2 Zinc finger, C3HC4 type (RING finger); zf-rbx1 RING-H2 zinc finger domain; zf-RING_5 zinc-RING finger domain; zf-C3HC4 Zinc finger, C3HC4 type (RING finger); zf-RING_UBOX RING-type zinc-finger; zf-C3HC4_3 Zinc finger, C3HC4 type (RING finger)
	Up		Cla017364	Chr10:16724746_16726305(-)	70.2886	26.0732	1.43072	0.000810937	0.01581	Universal stress protein family protein (AHRD V1 **** D7LT71_ARALL); contains Interpro domain(s) IPR006016 UspA	AT3G62550	58.17	4e-57	NA	Adenine nucleotide alpha hydrolases-like superfamily protein;Adenine nucleotide alpha hydrolases-like superfamily protein;Adenine nucleotide alpha hydrolases-like superfamily protein	Usp Universal stress protein family
	Up	Up	Cla019959	Chr2:25397246_25399462(-)	39.8882	16.1931	1.30058	0.00806493	0.0359218	Universal stress protein (AHRD V1 **** B6SNQ1_MAIZE); contains Interpro domain(s) IPR006016 UspA	AT3G62550	45.89	1e-40	NA	Adenine nucleotide alpha hydrolases-like superfamily protein;Adenine nucleotide alpha hydrolases-like superfamily protein;Adenine nucleotide alpha hydrolases-like superfamily protein	Usp Universal stress protein family
	Down		Cla014748	Chr9:5493176_5493682(+)	14.7513	295.404	-4.32378	1.24e-05	0.00718174	AAA ATPase containing von Willebrand factor type A (AHRD V1 *--- B6TNC9_MAIZE)	AT3G63095	55.77	8e-08	NA	Tetratricopeptide repeat (TPR)-like superfamily protein	No hits detected that satisfy reporting thresholds
	Down		Cla004949	Chr1:750789_753762(+)	4.45478	12.9587	-1.54049	0.00886119	0.037456	Multidrug resistance protein mdtK (AHRD V1 **-- MDTK_ENTS8); contains Interpro domain(s) IPR002528 Multi antimicrobial extrusion protein MatE	AT4G00350	66.02	0	NA	MATE efflux family protein;detoxifying efflux carrier 35;detoxifying efflux carrier 35	MatE MatE
	Down		Cla006148	Chr5:8632873_8634908(-)	1.83461	4.47214	-1.28549	0.00492672	0.028668	Receptor-like protein kinase (AHRD V1 **** Q0WPA7_ARATH); contains Interpro domain(s) IPR002290 Serine/threonine protein kinase	AT4G01330	38.92	3e-63	NA	Protein kinase superfamily protein;Protein kinase superfamily protein;Protein kinase superfamily protein	Pkinase_Tyr Protein tyrosine kinase; Pkinase Protein kinase domain
	Up		Cla021058	Chr5:37439_38104(+)	12.1892	4.96958	1.2944	0.00170379	0.0195671	NHL1 (Fragment) (AHRD V1 **-- B0LZI0_ARATH); contains Interpro domain(s) IPR010847 Harpin-induced 1	AT4G01410	49.3	2e-66	NA	Late embryogenesis abundant (LEA) hydroxyproline-rich glycoprotein family;Late embryogenesis abundant (LEA) hydroxyproline-rich glycoprotein family;NDR1/HIN1-like 22	LEA_2 Late embryogenesis abundant protein
	Down	Down	Cla015152	Chr9:3937134_3940029(-)	2.78622	12.3264	-2.14537	0.00148447	0.0188494	Stachyose synthase (AHRD V1 **-- B8LG99_CUCSA); contains Interpro domain(s) IPR008811 Raffinose synthase	AT4G01970	59.77	0	NA	stachyose synthase;stachyose synthase;Raffinose synthase family protein	Raffinose_syn Raffinose synthase or seed imbibition protein Sip1
	Down		Cla018702	Chr6:21126887_21129496(+)	3.43762	12.4906	-1.86136	0.00265026	0.0230015	Membrane transporter D1 (AHRD V1 **** GTR1_LEIDO); contains Interpro domain(s) IPR003663 Sugar/inositol transporter	AT4G02050	77.34	0	NA	sugar transporter protein 7;sugar transporter protein 7;Major facilitator superfamily protein	Sugar_tr Sugar (and other) transporter; MFS_1 Major Facilitator Superfamily
	Down	Down	Cla017397	Chr10:16153806_16154994(-)	28.5289	72.802	-1.35155	0.00207057	0.0209778	Epoxide hydrolase 2 (AHRD V1 ***- D8L7V8_PRUPE); contains Interpro domain(s) IPR000073 Alpha/beta hydrolase fold-1	AT4G02340	62.34	9e-153	NA	alpha/beta-Hydrolases superfamily protein;alpha/beta-Hydrolases superfamily protein;soluble epoxide hydrolase	Abhydrolase_1 alpha/beta hydrolase fold; Abhydrolase_6 Alpha/beta hydrolase family; Hydrolase_4 Serine aminopeptidase, S33
	Up		Cla017403	Chr10:16101611_16102994(+)	9.23256	2.09856	2.13733	0.00114236	0.0174999	Epoxide hydrolase 2 (AHRD V1 ***- D8L7V8_PRUPE); contains Interpro domain(s) IPR000073 Alpha/beta hydrolase fold-1	AT4G02340	64.24	4e-160	NA	alpha/beta-Hydrolases superfamily protein;alpha/beta-Hydrolases superfamily protein;alpha/beta-Hydrolases superfamily protein	Abhydrolase_1 alpha/beta hydrolase fold; Abhydrolase_6 Alpha/beta hydrolase family; Hydrolase_4 Serine aminopeptidase, S33
	Down	Down	Cla021757	Chr5:5936440_5940018(-)	4.52694	27.3118	-2.59292	0.002958	0.0238002	Epoxide hydrolase 1 (AHRD V1 ***- D8L7V7_PRUPE); contains Interpro domain(s) IPR000073 Alpha/beta hydrolase fold-1	AT4G02340	61.44	2e-145	NA	alpha/beta-Hydrolases superfamily protein;alpha/beta-Hydrolases superfamily protein;soluble epoxide hydrolase	Abhydrolase_6 Alpha/beta hydrolase family; Abhydrolase_1 alpha/beta hydrolase fold; Hydrolase_4 Serine aminopeptidase, S33
	Down		Cla013580	Chr2:27822850_27824751(-)	13.125	38.0819	-1.53679	0.000414042	0.0134838	Protein phosphatase 2c (AHRD V1 ***- A6NA79_MEDTR); contains Interpro domain(s) IPR015655 Protein phosphatase 2C	AT4G03415	68.14	0	NA	Protein phosphatase 2C family protein;Protein phosphatase 2C family protein;Protein phosphatase 2C family protein	PP2C Protein phosphatase 2C
	Up		Cla013565	Chr2:27974319_27975077(-)	13.4771	6.21102	1.1176	0.00418415	0.0270217	RING finger protein 5 (AHRD V1 *--- B6TI40_MAIZE); contains Interpro domain(s) IPR001841 Zinc finger, RING-type	AT4G03510	39.47	1e-58	NA	RING membrane-anchor 1;RING membrane-anchor 1;RING membrane-anchor 1	zf-C3HC4_2 Zinc finger, C3HC4 type (RING finger); zf-C3HC4 Zinc finger, C3HC4 type (RING finger); zf-RING_UBOX RING-type zinc-finger; zf-RING_2 Ring finger domain; zf-C3HC4_3 Zinc finger, C3HC4 type (RING finger)
	Down		Cla014417	Chr1:30622627_30623112(-)	0.709442	8.45015	-3.57422	0.00688901	0.0331126	Plant-specific domain TIGR01568 family protein (AHRD V1 *--- B6U0L3_MAIZE); contains Interpro domain(s) IPR006458 Protein of unknown function DUF623, plant	AT4G04025	48.73	2e-34	NA	transcription repressor;ovate family protein 3	Ovate Transcriptional repressor, ovate
	Down		Cla001338	Chr1:31163138_31165488(+)	4.44896	9.32509	-1.06765	0.00509263	0.0291169	Equilibrative nucleoside transporter (AHRD V1 *-*- B9H200_POPTR); contains Interpro domain(s) IPR002259 Delayed-early response protein/equilibrative nucleoside transporter	AT4G05120	47.12	7e-49	NA	Major facilitator superfamily protein;Major facilitator superfamily protein;equilibrative nucleoside transporter 6	Nucleoside_tran Nucleoside transporter
	Down		Cla016923	Chr11:26137532_26138283(-)	0.12799	3.13231	-4.61312	0.00306157	0.0239389	Regulator of nonsense transcripts 1-like (AHRD V1 **-- Q5Z4Y8_ORYSJ)	AT4G05540	67.03	1e-35	NA	No Hits	AAA_12 AAA domain
	Down		Cla020646	Chr5:28028446_28030161(+)	3.68853	9.57348	-1.376	0.00102913	0.0169181	SPRY domain-containing protein (AHRD V1 *-*- B6JYC6_SCHJY); contains Interpro domain(s) IPR003877 SPla/RYanodine receptor SPRY	AT4G06536	45.3	8e-44	NA	SPla/RYanodine receptor (SPRY) domain-containing protein;transmembrane protein	SPRY SPRY domain
	Down	Down	Cla011894	Chr11:2999414_3004266(-)	7.60226	18.5166	-1.28432	0.000382152	0.0133966	Glycoside hydrolase 15-related (AHRD V1 *--- B3EPZ8_CHLPB); contains Interpro domain(s) IPR006869 Protein of unknown function DUF547	AT4G08550	63.39	0	NA	electron carrier/ protein disulfide oxidoreductase;electron carrier/ protein disulfide oxidoreductase;glutaredoxin-like protein	DUF547 Protein of unknown function, DUF547; DEP Domain found in Dishevelled, Egl-10, and Pleckstrin (DEP); Glutaredoxin Glutaredoxin
	Down	Down	Cla019841	Chr2:26624456_26636309(+)	1.46067	10.8341	-2.89087	0.00272985	0.023308	Unknown Protein (AHRD V1)	AT4G08630	49.52	6e-12	NA	fas-binding factor-like protein;fas-binding factor-like protein;coiled-coil protein	No hits detected that satisfy reporting thresholds
	Down		Cla011574	Chr1:4001850_4002272(-)	1.58631	5.90869	-1.89717	0.00123478	0.0179795	Cortical cell-delineating protein (AHRD V1 *--- B6UGA2_MAIZE); contains Interpro domain(s) IPR013770 Plant lipid transfer protein and hydrophobic protein, helical	AT4G12520	57.14	3e-43	NA	Bifunctional inhibitor/lipid-transfer protein/seed storage 2S albumin superfamily protein;Bifunctional inhibitor/lipid-transfer protein/seed storage 2S albumin superfamily protein;Bifunctional inhibitor/lipid-transfer protein/seed storage 2S albumin superfamily protein	Hydrophob_seed Hydrophobic seed protein; Tryp_alpha_amyl Protease inhibitor/seed storage/LTP family
	Up		Cla016997	Chr10:21200470_21201612(-)	60.1713	29.5281	1.02699	0.00011756	0.0105099	F-box (AHRD V1 **-- Q84UT3_PRUMU); contains Interpro domain(s) IPR006527 F-box associated	AT4G12560	29.1	8e-37	NA	F-box and associated interaction domains-containing protein;F-box and associated interaction domains-containing protein;F-box and associated interaction domains-containing protein	FBA_1 F-box associated
	Down		Cla000569	Chr0:9481378_9481970(-)	3.45678	12.5412	-1.85917	0.000695562	0.0152975	Major latex protein (AHRD V1 **-- Q71HN2_FICAW); contains Interpro domain(s) IPR000916 Bet v I allergen	AT4G14060	42	5e-39	NA	Polyketide cyclase/dehydrase and lipid transport superfamily protein;Polyketide cyclase/dehydrase and lipid transport superfamily protein;Polyketide cyclase/dehydrase and lipid transport superfamily protein	Bet_v_1 Pathogenesis-related protein Bet v I family
	Down		Cla006081	Chr7:2909375_2915090(-)	19.7652	41.1503	-1.05794	0.00511736	0.0291363	DUF21 and CBS domain-containing protein (AHRD V1 *--- F2PY44_TRIEC); contains Interpro domain(s) IPR002550 Protein of unknown function DUF21	AT4G14230	71.21	0	NA	CBS domain protein with a domain protein (DUF21);CBS domain protein with a domain protein (DUF21);CBS domain protein with a domain protein (DUF21)	DUF21 Cyclin M transmembrane N-terminal domain; CBS CBS domain
	Down	Down	Cla007600	Chr6:8182656_8185150(+)	26.0729	54.3879	-1.06074	0.00189608	0.0203259	Peroxisomal membrane protein PMP22 (AHRD V1 **-* B6SRR1_MAIZE); contains Interpro domain(s) IPR007248 Mpv17/PMP22	AT4G14305	79.46	1e-109	NA	Peroxisomal membrane 22 kDa (Mpv17/PMP22) family protein;Peroxisomal membrane 22 kDa (Mpv17/PMP22) family protein;Peroxisomal membrane 22 kDa (Mpv17/PMP22) family protein	Mpv17_PMP22 Mpv17 / PMP22 family
	Down		Cla009278	Chr6:5270686_5273144(-)	4.58254	9.2498	-1.01327	0.00260709	0.0228416	Unknown Protein (AHRD V1)	AT4G16060	58.78	3e-100	NA	hypothetical protein	No hits detected that satisfy reporting thresholds
	Up		Cla009279	Chr6:5283642_5285629(-)	3.02272	1.08439	1.47896	0.00104901	0.0170271	Unknown Protein (AHRD V1)	AT4G16060	67.91	4e-54	NA	hypothetical protein	No hits detected that satisfy reporting thresholds
	Down		Cla009256	Chr6:5037442_5043516(+)	30.8093	80.1053	-1.37853	0.000172953	0.011725	Dihydrolipoyl dehydrogenase (AHRD V1 ***- D5MAF8_TRIRP); contains Interpro domain(s) IPR006258 Dihydrolipoamide dehydrogenase	AT4G16155	84.19	0	NA	lipoamide dehydrogenase 1;dihydrolipoamide dehydrogenase;lipoamide dehydrogenase 1	Pyr_redox_2 Pyridine nucleotide-disulphide oxidoreductase; Pyr_redox_dim Pyridine nucleotide-disulphide oxidoreductase, dimerisation domain; Pyr_redox Pyridine nucleotide-disulphide oxidoreductase; FAD_binding_2 FAD binding domain; GIDA Glucose inhibited division protein A
	Down		Cla014399	Chr1:30483402_30485793(+)	0.441859	3.10365	-2.81231	0.000114563	0.0105099	Membrane transporter D1 (AHRD V1 **** B6U4Q3_MAIZE); contains Interpro domain(s) IPR003663 Sugar/inositol transporter	AT4G16480	69.1	0	NA	inositol transporter 4;inositol transporter 4;inositol transporter 4	Sugar_tr Sugar (and other) transporter; MFS_1 Major Facilitator Superfamily
	Down		Cla023317	Chr11:19576843_19577655(+)	2.47402	6.623	-1.42063	0.00193096	0.0205614	Phosphatase PTC7 homolog (AHRD V1 ***- C1BT38_9MAXI); contains Interpro domain(s) IPR001932 Protein phosphatase 2C-related	AT4G16580	46.37	3e-62	NA	Protein phosphatase 2C family protein;Protein phosphatase 2C family protein;Protein phosphatase 2C family protein	SpoIIE Stage II sporulation protein E (SpoIIE); PP2C Protein phosphatase 2C
	Down		Cla016219	Chr9:11349936_11350899(+)	3.77819	10.7978	-1.51497	0.0082151	0.036138	TPR domain protein (AHRD V1 *-*- B6U810_MAIZE); contains Interpro domain(s) IPR011990 Tetratricopeptide-like helical	AT4G17940	38.7	2e-46	NA	Tetratricopeptide repeat (TPR)-like superfamily protein;Tetratricopeptide repeat (TPR)-like superfamily protein;Tetratricopeptide repeat (TPR)-like superfamily protein	TPR_17 Tetratricopeptide repeat
	Down	Down	Cla021762	Chr5:5973125_5974883(+)	0.044417	31.8648	-9.48664	9.73e-07	0.00718174	Polygalacturonase (AHRD V1 ***- Q2M4X6_LILLO); contains Interpro domain(s) IPR000743 Glycoside hydrolase, family 28	AT4G18180	45.97	1e-118	NA	Pectin lyase-like superfamily protein;polygalacturonase 4;Pectin lyase-like superfamily protein	Glyco_hydro_28 Glycosyl hydrolases family 28; Pectate_lyase_3 Pectate lyase superfamily protein
	Down	Down	Cla016268	Chr9:10492576_10493840(-)	3.78292	316.067	-6.38459	1.37e-05	0.00718174	Phospholipase A1 (AHRD V1 ***- A5YW95_CAPAN); contains Interpro domain(s) IPR002921 Lipase, class 3	AT4G18550	59.7	7e-172	NA	alpha/beta-Hydrolases superfamily protein;alpha/beta-Hydrolases superfamily protein;alpha/beta-Hydrolases superfamily protein	Lipase_3 Lipase (class 3)
	Down		Cla006983	Chr6:564332_567113(+)	8.60852	18.7028	-1.11942	0.000332565	0.012984	Nodulin-like family protein expressed (AHRD V1 **-- Q2QYU1_ORYSJ); contains Interpro domain(s) IPR010658 Nodulin-like	AT4G19450	59.23	0	NA	Major facilitator superfamily protein;Major facilitator superfamily protein;Major facilitator superfamily protein	Nodulin-like Nodulin-like
	Down	Down	Cla008084	Chr4:3088115_3089190(+)	0.36941	11.7965	-4.997	0.0104028	0.0402033	Chitinase-like protein (AHRD V1 ***- O81856_ARATH); contains Interpro domain(s) IPR011583 Chitinase II	AT4G19810	37.57	7e-68	NA	Glycosyl hydrolase family protein with chitinase insertion domain-containing protein;Glycosyl hydrolase family protein with chitinase insertion domain-containing protein;Glycosyl hydrolase family protein with chitinase insertion domain-containing protein	Glyco_hydro_18 Glycosyl hydrolases family 18
	Down		Cla001351	Chr1:31273253_31273654(-)	188.032	410.016	-1.1247	0.000366002	0.0133364	Cold shock protein-1 (AHRD V1 *-*- B6TR42_MAIZE)	AT4G21620	64.6	3e-15	NA	glycine-rich protein;hypothetical protein;glycine-rich protein	No hits detected that satisfy reporting thresholds
	Up		Cla020449	Chr5:29752397_29753282(+)	36.1809	15.1747	1.25356	0.00539356	0.0298565	Methyltransferase type 11 (AHRD V1 ***- B4S4W9_PROA2); contains Interpro domain(s) IPR013216 Methyltransferase type 11	AT4G22530	56.25	3e-102	NA	S-adenosyl-L-methionine-dependent methyltransferases superfamily protein;S-adenosyl-L-methionine-dependent methyltransferases superfamily protein;S-adenosyl-L-methionine-dependent methyltransferases superfamily protein	Methyltransf_11 Methyltransferase domain; Methyltransf_25 Methyltransferase domain; Methyltransf_31 Methyltransferase domain
	Down		Cla011506	Chr1:3155693_3156592(+)	2.06317	4.15966	-1.0116	0.00676669	0.032843	Unknown Protein (AHRD V1); contains Interpro domain(s) IPR010605 Protein of unknown function DUF1191	AT4G22900	45.34	1e-91	NA	transmembrane protein%2C putative (DUF1191);transmembrane protein%2C putative (DUF1191);transmembrane protein%2C putative (DUF1191)	DUF1191 Protein of unknown function (DUF1191)
	Up		Cla008879	Chr10:1430693_1432916(-)	2.2573	0.304405	2.89054	0.00245787	0.0223644	Short-chain dehydrogenase/reductase family protein (AHRD V1 ***- D7M8Y3_ARALL); contains Interpro domain(s) IPR002198 Short-chain dehydrogenase/reductase SDR	AT4G24050	50.67	7e-83	NA	NAD(P)-binding Rossmann-fold superfamily protein;NAD(P)-binding Rossmann-fold superfamily protein;NAD(P)-binding Rossmann-fold superfamily protein	adh_short short chain dehydrogenase; adh_short_C2 Enoyl-(Acyl carrier protein) reductase
	Down	Down	Cla017488	Chr10:23170217_23173347(+)	21.9834	69.6063	-1.6628	0.00835438	0.0363808	Family of serine hydrolases 2 (AHRD V1 **-- FSH2_YEAST); contains Interpro domain(s) IPR005645 Protein of unknown function DUF341	AT4G24380	46.04	4e-66	NA	dihydrofolate reductase;dihydrofolate reductase;alpha/beta-Hydrolases superfamily protein	FSH1 Serine hydrolase (FSH1)
	Up		Cla023061	Chr11:16966868_16974655(-)	21.3636	9.74428	1.13253	0.00877595	0.0372284	Protein kinase family protein (AHRD V1 **** F4JQX7_ARATH); contains Interpro domain(s) IPR002290 Serine/threonine protein kinase	AT4G24480	56.95	0	NA	Protein kinase superfamily protein;Protein kinase superfamily protein;Protein kinase superfamily protein	EDR1 Ethylene-responsive protein kinase Le-CTR1; Pkinase_Tyr Protein tyrosine kinase; Pkinase Protein kinase domain
	Down		Cla006355	Chr9:23635074_23636221(+)	0.332645	2.81889	-3.08307	0.00588748	0.0308163	Peroxidase 43 (AHRD V1 ***- F4JU42_ARATH); contains Interpro domain(s) IPR002016 Haem peroxidase, plant/fungal/bacterial	AT4G25980	62.7	2e-80	NA	peroxidase superfamily protein;peroxidase superfamily protein;peroxidase superfamily protein	peroxidase Peroxidase
	Down		Cla006356	Chr9:23640481_23640879(+)	0.393536	2.26757	-2.52658	0.00397947	0.0265522	Peroxidase 43 (AHRD V1 ***- F4JU42_ARATH); contains Interpro domain(s) IPR010255 Haem peroxidase	AT4G25980	63.08	1e-53	NA	peroxidase superfamily protein;peroxidase superfamily protein;Peroxidase superfamily protein	peroxidase Peroxidase
	Down		Cla021133	Chr5:673872_674311(-)	3.58636	82.1115	-4.51699	0.0100421	0.0395093	Protein yippee-like (AHRD V1 ***- B6TSY7_MAIZE); contains Interpro domain(s) IPR004910 Yippee-like protein	AT4G27745	53.92	2e-35	NA	Yippee family putative zinc-binding protein;Yippee family putative zinc-binding protein;Yippee family putative zinc-binding protein	Yippee-Mis18 Yippee zinc-binding/DNA-binding /Mis18, centromere assembly
	Down		Cla004262	Chr5:9353214_9354276(+)	3.08602	33.9044	-3.45766	0.000186405	0.0120266	Unknown Protein (AHRD V1)	AT4G27810	33.8	6e-19	NA	hypothetical protein;hypothetical protein;hypothetical protein	No hits detected that satisfy reporting thresholds
	Down		Cla005932	Chr7:1479129_1485516(-)	2.5869	7.14281	-1.46527	0.0105255	0.0403941	Kinase pfkB family protein (AHRD V1 ***- Q7XDM4_ORYSJ); contains Interpro domain(s) IPR011611 Carbohydrate/purine kinase	AT4G28706	63.01	4e-166	NA	pfkB-like carbohydrate kinase family protein;pfkB-like carbohydrate kinase family protein;pfkB-like carbohydrate kinase family protein	PfkB pfkB family carbohydrate kinase
	Down	Down	Cla004097	Chr6:12662559_12664764(-)	0.0345917	7.68211	-7.79493	5.46e-05	0.00976752	5&apos-methylthioadenosine nucleosidase/ S-adenosylhomocysteine nucleosidase (AHRD V1 ***- F7QFT3_9BRAD); contains Interpro domain(s) IPR018017 Nucleoside phosphorylase, family 1	AT4G28940	60.65	3e-152	NA	Phosphorylase superfamily protein;Phosphorylase superfamily protein;Phosphorylase superfamily protein	PNP_UDP_1 Phosphorylase superfamily
	Down		Cla016789	Chr11:24894578_24895210(+)	3.58631	8.42169	-1.23161	0.0111404	0.0416641	Avr9/Cf-9 rapidly elicited protein 146 (AHRD V1 **-- Q9FQZ6_TOBAC)	AT4G29110	38.81	2e-31	NA	cotton fiber protein;Avr9/Cf-9 rapidly elicited protein;Avr9/Cf-9 rapidly elicited protein	DUF761 Cotton fibre expressed protein
	Down	Down	Cla018764	Chr6:21819024_21821096(-)	17.1915	277.319	-4.01178	0.00055714	0.014235	Cinnamoyl-CoA reductase-like protein (AHRD V1 ***- Q9M0B3_ARATH); contains Interpro domain(s) IPR016040 NAD(P)-binding domain	AT4G30470	61.51	6e-134	NA	NAD(P)-binding Rossmann-fold superfamily protein;NAD(P)-binding Rossmann-fold superfamily protein;NAD(P)-binding Rossmann-fold superfamily protein	NAD_binding_10 NAD(P)H-binding; 3Beta_HSD 3-beta hydroxysteroid dehydrogenase/isomerase family; Epimerase NAD dependent epimerase/dehydratase family
	Down		Cla022992	Chr11:16263053_16263547(+)	4.87968	33.285	-2.77002	0.00276531	0.0234035	Uncharacterized conserved protein (AHRD V1 *--- A6T1A7_JANMA); contains Interpro domain(s) IPR006747 Protein of unknown function DUF599	AT4G31330	73.97	8e-72	NA	transmembrane protein%2C putative (Protein of unknown function%2C DUF599);plant/protein (Protein of unknown function%2C DUF599);plant/protein (Protein of unknown function%2C DUF599)	DUF599 Protein of unknown function, DUF599
	Down		Cla018737	Chr6:21526486_21526746(-)	0.461265	2.29773	-2.31654	0.00470383	0.0281682	Unknown Protein (AHRD V1)	AT4G31830	53.33	2e-16	NA	transmembrane protein	No hits detected that satisfy reporting thresholds
	Up		Cla002265	Chr7:1264103_1265237(-)	61.7021	17.5756	1.81175	0.0015058	0.0189334	Plant-specific domain TIGR01615 family protein (AHRD V1 ***- B6UDN7_MAIZE); contains Interpro domain(s) IPR006502 Protein of unknown function DUF506, plant	AT4G32480	50.54	2e-87	NA	sugar phosphate exchanger%2C putative (DUF506);sugar phosphate exchanger%2C putative (DUF506);sulfate/thiosulfate import ATP-binding protein%2C putative (DUF506)	PDDEXK_6 PDDEXK-like family of unknown function
	Up		Cla019509	Chr3:6036694_6038138(+)	44.7086	17.4939	1.3537	0.00143348	0.0185128	Plant-specific domain TIGR01615 family protein (AHRD V1 ***- B6UDN7_MAIZE); contains Interpro domain(s) IPR006502 Protein of unknown function DUF506, plant	AT4G32480	48.76	9e-87	NA	sugar phosphate exchanger%2C putative (DUF506);sugar phosphate exchanger%2C putative (DUF506);sulfate/thiosulfate import ATP-binding protein%2C putative (DUF506)	PDDEXK_6 PDDEXK-like family of unknown function
	Down		Cla008085	Chr4:3096589_3096810(-)	0.290238	22.5668	-6.28083	0.000411992	0.0134838	Unknown Protein (AHRD V1)	AT4G33145	53.85	9e-09	NA	hypothetical protein	No hits detected that satisfy reporting thresholds
	Down	Down	Cla021962	Chr8:19096411_19101186(+)	5.84203	70.3202	-3.5894	0.0133751	0.0457664	Hydrolase-like protein (AHRD V1 ***- Q8H5Y0_ORYSJ); contains Interpro domain(s) IPR000073 Alpha/beta hydrolase fold-1	AT4G33180	58.09	7e-126	NA	alpha/beta-Hydrolases superfamily protein;alpha/beta-Hydrolases superfamily protein;alpha/beta-Hydrolases superfamily protein	Abhydrolase_1 alpha/beta hydrolase fold; Abhydrolase_6 Alpha/beta hydrolase family; Hydrolase_4 Serine aminopeptidase, S33
	Up		Cla022161	Chr8:21022271_21024879(+)	31.9528	11.2433	1.50688	0.00126723	0.01811	Carbonic anhydrase (AHRD V1 ***- D7TU30_VITVI); contains Interpro domain(s) IPR001765 Carbonic anhydrase	AT4G33580	56.58	3e-86	NA	beta carbonic anhydrase 5;beta carbonic anhydrase 5;beta carbonic anhydrase 5	Pro_CA Carbonic anhydrase
	Down	Down	Cla016045	Chr2:6745218_6748071(-)	24.0959	195.23	-3.01831	7.01e-05	0.00982612	Acetyl xylan esterase A (AHRD V1 **-- E5C8U8_9BACE); contains Interpro domain(s) IPR005181 Protein of unknown function DUF303, acetylesterase putative	AT4G34215	60.47	7e-104	NA	carbohydrate esterase%2C putative (DUF303);carbohydrate esterase%2C putative (DUF303);carbohydrate esterase%2C putative (DUF303)	SASA Carbohydrate esterase, sialic acid-specific acetylesterase
	Up		Cla010296	Chr9:29998066_30001531(+)	5.08632	1.24334	2.03241	0.0115926	0.0425816	Unknown Protein (AHRD V1); contains Interpro domain(s) IPR007749 Protein of unknown function DUF677	AT4G34320	66.49	2e-167	NA	transmembrane protein%2C putative (DUF677);transmembrane protein%2C putative (DUF677);transmembrane protein%2C putative (DUF677)	DUF677 Protein of unknown function (DUF677); BPS1 Protein BYPASS1-related
	Down		Cla016579	Chr11:22779667_22783744(+)	3.85921	9.37485	-1.28049	0.000626706	0.0147786	Phosphatidylinositol transfer-like protein II (AHRD V1 **-- Q94FN3_LOTJA); contains Interpro domain(s) IPR001251 Cellular retinaldehyde-binding/triple function, C-terminal	AT4G34580	60.07	0	NA	Sec14p-like phosphatidylinositol transfer family protein;Sec14p-like phosphatidylinositol transfer family protein;SEC14-like 3	CRAL_TRIO CRAL/TRIO domain; CRAL_TRIO_N CRAL/TRIO, N-terminal domain
	Down		Cla015825	Chr2:3919097_3920049(-)	9.40548	40.3258	-2.10013	0.000306567	0.0129433	Baculoviral IAP repeat-containing 4 (Predicted) (AHRD V1 *--- B1MTJ9_CALMO); contains Interpro domain(s) IPR001841 Zinc finger, RING-type	AT4G35070	44.39	1e-51	NA	SBP (S-ribonuclease binding protein) family protein;SBP (S-ribonuclease binding protein) family protein;SBP (S-ribonuclease binding protein) family protein	zf-C3HC4_3 Zinc finger, C3HC4 type (RING finger)
	Down		Cla023448	Chr11:20822639_20825910(+)	1.93609	6.84777	-1.82248	0.00102664	0.0169132	Catalase (AHRD V1 ***- D2D313_GOSHI); contains Interpro domain(s) IPR000270 Octicosapeptide/Phox/Bem1p	AT4G35090	90.33	0	NA	catalase 2;catalase 2;catalase 1	Catalase Catalase; Catalase-rel Catalase-related immune-responsive
	Up		Cla008931	Chr10:1870530_1871402(-)	2.92726	1.01189	1.53251	0.00497163	0.028788	CM0216.330.nc protein (AHRD V1 ***- B0BLI1_LOTJA); contains Interpro domain(s) IPR004320 Protein of unknown function DUF241, plant	AT4G35690	34.46	8e-51	NA	hypothetical protein (DUF241);DUF241 domain protein%2C putative (DUF241);DUF241 domain protein%2C putative (DUF241)	DUF241 Arabidopsis protein of unknown function
	Up		Cla014335	Chr1:30070977_30071834(-)	18.1106	3.74686	2.27308	0.00239543	0.0221714	CM0216.240.nc protein (AHRD V1 ***- B0BLH5_LOTJA); contains Interpro domain(s) IPR004320 Protein of unknown function DUF241, plant	AT4G35690	40.89	5e-61	NA	hypothetical protein (DUF241);DUF241 domain protein%2C putative (DUF241);DUF241 domain protein%2C putative (DUF241)	DUF241 Arabidopsis protein of unknown function
	Up		Cla014307	Chr1:29902189_29903307(+)	3.6116	0.946846	1.93144	0.00622636	0.0316032	Mid1-complementing activity 1 (AHRD V1 **-- Q10RJ5_ORYSJ)	AT4G35920	63.98	1e-117	NA	PLAC8 family protein;PLAC8 family protein;PLAC8 family protein	No hits detected that satisfy reporting thresholds
	Down		Cla000716	Chr1:26879718_26883400(+)	26.5355	71.9062	-1.43819	0.000978609	0.0165911	ATP-dependent RNA helicase fal1 (AHRD V1 **-- B2WHT2_PYRTR)	AT4G37020	66.05	4e-87	NA	initiation factor 4A-like protein;initiation factor 4A-like protein;DEA(D/H)-box RNA helicase family protein	No hits detected that satisfy reporting thresholds
	Down		Cla020196	Chr2:22469179_22471366(+)	0.242069	2.62187	-3.43711	0.0102417	0.0399157	Unknown Protein (AHRD V1)	AT4G37080	43.84	3e-34	NA	ternary complex factor MIP1 leucine-zipper protein (Protein of unknown function%2C DUF547);ternary complex factor MIP1 leucine-zipper protein (Protein of unknown function%2C DUF547);ternary complex factor MIP1 leucine-zipper protein (Protein of unknown function%2C DUF547)	Lzipper-MIP1 Leucine-zipper of ternary complex factor MIP1
	Up		Cla021927	Chr8:18635955_18637664(-)	4.37496	1.72218	1.34504	5.45e-06	0.00718174	Glycosyl transferase family 2 (AHRD V1 *--- D3HZX3_9BACT); contains Interpro domain(s) IPR008166 Protein of unknown function DUF23	AT4G37420	46.57	6e-174	NA	glycosyltransferase family protein (DUF23);glycosyltransferase family protein (DUF23);C3H4 type zinc finger protein (DUF23)	Glyco_transf_92 Glycosyltransferase family 92; Glyco_tranf_2_4 Glycosyl transferase family 2
	Down		Cla015728	Chr2:3021562_3021900(-)	1.79298	5.54694	-1.62933	0.00230403	0.0218048	Unknown Protein (AHRD V1)	AT4G38213	51.79	3e-29	NA	tubulin-tyrosine ligase	No hits detected that satisfy reporting thresholds
	Up		Cla014156	Chr1:28706600_28707652(-)	13.1699	5.2782	1.31912	0.00527071	0.029592	Ethylene-responsive transcription factor 5 (AHRD V1 *-** ERF5_NICSY); contains Interpro domain(s) IPR001471 Pathogenesis-related transcriptional factor and ERF, DNA-binding	AT4G39780	43.85	2e-74	NA	Integrase-type DNA-binding superfamily protein;related to AP2 4;Integrase-type DNA-binding superfamily protein	AP2 AP2 domain
	Down		Cla019488	Chr3:5818687_5819985(-)	0.532306	14.8035	-4.79754	0.000438388	0.0136976	Alpha 1 4-galactosyltransferase (AHRD V1 *-*- Q3UF00_MOUSE); contains Interpro domain(s) IPR007652 Alpha 1,4-glycosyltransferase conserved region	AT5G01250	46.44	6e-103	NA	alpha 1%2C4-glycosyltransferase family protein;alpha 1%2C4-glycosyltransferase family protein;alpha 1%2C4-glycosyltransferase family protein	Gb3_synth Alpha 1,4-glycosyltransferase conserved region; Gly_transf_sug Glycosyltransferase sugar-binding region containing DXD motif
	Down	Down	Cla013363	Chr2:29995641_29996579(-)	7.3757	28.0307	-1.92615	0.00662382	0.0325736	Pyridoxal biosynthesis lyase pdxS (AHRD V1 **** A1HUH0_9FIRM); contains Interpro domain(s) IPR001852 Vitamin B6 biosynthesis protein	AT5G01410	86.22	0	NA	Aldolase-type TIM barrel family protein;Aldolase-type TIM barrel family protein;pyridoxine biosynthesis 1.1	SOR_SNZ SOR/SNZ family; ThiG Thiazole biosynthesis protein ThiG; Dus Dihydrouridine synthase (Dus)
	Up		Cla017903	Chr10:27135555_27137079(-)	434.935	162.854	1.41722	0.000830064	0.0159747	Pyrimidine 5&apos-nucleotidase (AHRD V1 ***- D9QG58_BRESC); contains Interpro domain(s) IPR010237 Pyrimidine 5-nucleotidase	AT5G02230	69.83	5e-140	NA	Haloacid dehalogenase-like hydrolase (HAD) superfamily protein;Haloacid dehalogenase-like hydrolase (HAD) superfamily protein;Haloacid dehalogenase-like hydrolase (HAD) superfamily protein	HAD_2 Haloacid dehalogenase-like hydrolase; Hydrolase haloacid dehalogenase-like hydrolase
	Up		Cla018201	Chr4:19701345_19704755(+)	108.909	40.9692	1.41051	0.00431996	0.027413	Pyrimidine 5&apos-nucleotidase (AHRD V1 ***- B4WF69_9CAUL); contains Interpro domain(s) IPR010237 Pyrimidine 5-nucleotidase	AT5G02230	67.01	7e-125	NA	Haloacid dehalogenase-like hydrolase (HAD) superfamily protein;Haloacid dehalogenase-like hydrolase (HAD) superfamily protein;Haloacid dehalogenase-like hydrolase (HAD) superfamily protein	HAD_2 Haloacid dehalogenase-like hydrolase
	Down		Cla013269	Chr2:30810261_30810725(+)	6.95134	14.8073	-1.09095	0.00362045	0.025623	Unknown Protein (AHRD V1)	AT5G02640	48.75	5e-38	NA	hypothetical protein;hypothetical protein;hypothetical protein	No hits detected that satisfy reporting thresholds
	Down	Down	Cla018383	Chr4:21507176_21509618(+)	8.052	116.18	-3.85087	0.00108901	0.0171748	GDSL esterase/lipase (AHRD V1 ***- F4KGN8_ARATH); contains Interpro domain(s) IPR001087 Lipase, GDSL	AT5G03610	52.65	1e-121	NA	GDSL-like Lipase/Acylhydrolase superfamily protein;GDSL-like Lipase/Acylhydrolase superfamily protein;GDSL-like Lipase/Acylhydrolase superfamily protein	Lipase_GDSL GDSL-like Lipase/Acylhydrolase
	Down		Cla018382	Chr4:21500031_21503576(-)	4.60856	9.35958	-1.02213	0.00112456	0.0174279	Subtilisin-like serine protease (AHRD V1 **-- Q9FIM6_ARATH); contains Interpro domain(s) IPR015500 Peptidase S8, subtilisin-related	AT5G03620	57.65	0	NA	Subtilisin-like serine endopeptidase family protein;xylem serine peptidase 1;Subtilisin-like serine endopeptidase family protein	Peptidase_S8 Subtilase family; fn3_6 Fibronectin type-III domain; Inhibitor_I9 Peptidase inhibitor I9
	Down		Cla002931	Chr10:21664886_21666935(-)	0.737211	2.56689	-1.79987	0.0149174	0.04851	IQ-domain 12 (AHRD V1 ***- D7LXD7_ARALL); contains Interpro domain(s) IPR000048 IQ calmodulin-binding region	AT5G03960	42.75	2e-51	NA	IQ-domain 12;IQ-domain 12;IQ-domain 12	DUF4005 Protein of unknown function (DUF4005); IQ IQ calmodulin-binding motif
	Down		Cla012964	Chr9:21822153_21823593(-)	0.294921	4.84095	-4.03689	0.00782008	0.0353624	GDSL esterase/lipase (AHRD V1 ***- F4HY89_ARATH); contains Interpro domain(s) IPR001087 Lipase, GDSL	AT5G03980	46.27	3e-93	NA	GDSL-like Lipase/Acylhydrolase superfamily protein;SGNH hydrolase-type esterase superfamily protein;SGNH hydrolase-type esterase superfamily protein	Lipase_GDSL GDSL-like Lipase/Acylhydrolase
	Down		Cla019930	Chr2:25659320_25660718(+)	0.294702	4.85891	-4.04331	0.00930369	0.0381357	GDSL esterase/lipase (AHRD V1 ***- F4HY89_ARATH); contains Interpro domain(s) IPR001087 Lipase, GDSL	AT5G03980	45.67	4e-95	NA	SGNH hydrolase-type esterase superfamily protein;GDSL-like Lipase/Acylhydrolase superfamily protein;GDSL-like Lipase/Acylhydrolase superfamily protein	Lipase_GDSL GDSL-like Lipase/Acylhydrolase
	Down		Cla019932	Chr2:25649294_25650733(-)	0.164537	3.53947	-4.42705	0.00741711	0.0342841	GDSL esterase/lipase (AHRD V1 ***- F4HY89_ARATH); contains Interpro domain(s) IPR001087 Lipase, GDSL	AT5G03980	45.07	3e-93	NA	GDSL-like Lipase/Acylhydrolase superfamily protein;SGNH hydrolase-type esterase superfamily protein;GDSL-like Lipase/Acylhydrolase superfamily protein	Lipase_GDSL GDSL-like Lipase/Acylhydrolase
	Down		Cla020461	Chr5:29654662_29660520(-)	1.86909	4.79247	-1.35844	0.00675973	0.0328335	Beta-D-glucosidase (AHRD V1 ***- Q7XAS3_GOSHI); contains Interpro domain(s) IPR001764 Glycoside hydrolase, family 3, N-terminal	AT5G04885	65.6	0	NA	Glycosyl hydrolase family protein;Glycosyl hydrolase family protein;Glycosyl hydrolase family protein	Glyco_hydro_3 Glycosyl hydrolase family 3 N terminal domain; Glyco_hydro_3_C Glycosyl hydrolase family 3 C-terminal domain
	Up		Cla017647	Chr10:24872192_24872698(+)	6.46996	2.79781	1.20946	0.000518305	0.0139787	Unknown Protein (AHRD V1)	AT5G06280	38.89	2e-18	NA	hypothetical protein;hypothetical protein;hypothetical protein	No hits detected that satisfy reporting thresholds
	Up		Cla003188	Chr2:33779850_33781904(+)	9.10335	4.18998	1.11945	0.00515861	0.0292594	Peroxidase (AHRD V1 ***- Q40559_CUCSA); contains Interpro domain(s) IPR002016 Haem peroxidase, plant/fungal/bacterial	AT5G06730	56.21	2e-117	NA	Peroxidase superfamily protein;peroxidase 2;Peroxidase superfamily protein	peroxidase Peroxidase
	Down		Cla020043	Chr2:24539156_24540232(-)	2.32522	15.7151	-2.75671	0.000243736	0.012665	FIP1 (AHRD V1 **-- B6U778_MAIZE); contains Interpro domain(s) IPR004182 GRAM	AT5G08350	58.49	8e-64	NA	GRAM domain-containing protein / ABA-responsive protein-like protein;GRAM domain protein/ABA-responsive-like protein;GRAM domain-containing protein / ABA-responsive protein-like protein	GRAM GRAM domain
	Down		Cla020044	Chr2:24526860_24527927(-)	1.93239	6.32981	-1.71178	0.00236702	0.0220807	FIP1 (AHRD V1 **-- B6U778_MAIZE); contains Interpro domain(s) IPR004182 GRAM	AT5G08350	66.25	1e-75	NA	GRAM domain-containing protein / ABA-responsive protein-like protein;GRAM domain protein/ABA-responsive-like protein;GRAM domain-containing protein / ABA-responsive protein-like protein	GRAM GRAM domain
	Up		Cla016379	Chr9:9414524_9418146(-)	16.8039	6.39189	1.39448	0.00335463	0.0248694	GDSL esterase/lipase (AHRD V1 *-*- F4JSC9_ARATH); contains Interpro domain(s) IPR001087 Lipase, GDSL	AT5G08460	33.67	3e-09	NA	GDSL-like Lipase/Acylhydrolase superfamily protein;GDSL-like Lipase/Acylhydrolase superfamily protein;GDSL-like Lipase/Acylhydrolase superfamily protein	No hits detected that satisfy reporting thresholds
	Down		Cla004828	Chr10:11151636_11154805(-)	1.66191	6.47946	-1.96303	0.00541334	0.0298654	BTB/POZ domain-containing protein At1g30440 (AHRD V1 **-- Y1044_ARATH); contains Interpro domain(s) IPR004249 NPH3	AT5G10250	55.23	0	NA	Phototropic-responsive NPH3 family protein;Phototropic-responsive NPH3 family protein;Phototropic-responsive NPH3 family protein	NPH3 NPH3 family; BTB BTB/POZ domain
	Up		Cla020996	Chr5:24758929_24759570(-)	137.886	58.0651	1.24774	0.000137112	0.0107871	Serine-rich protein (AHRD V1 ***- E5GCC5_CUCME)	AT5G11090	56.16	3e-64	NA	serine-rich protein-like protein;serine-rich protein-like protein;serine-rich protein-like protein	No hits detected that satisfy reporting thresholds
[truncated: 147 more rows]

## Sheet: Table S7
	Table S7 GO enrichment analyses of DEGs
	Source	GO ID	GO Term	Ontology	GeneRatio	BgRatio	P-value	p.adjust	geneID	Up_num	Up_genes	Down_num	Down_genes
[truncated: 90 more rows]

## Sheet: Table S8
	Table S8 KEGG enrichment analyses of DEGs
	Source	KEGG_A_class	KEGG_B_class	Pathway	out (103)	All (4060)	Pvalue	Qvalue	Pathway ID	Genes	K_IDs	Up_num	Up_genes	Down_num	Down_genes
[truncated: 31 more rows]

## Sheet: Table S9
	Table S9 Detailed information of DE-lncRNAs
[truncated: 81 more rows]

[truncated: 5 more sheets: Table S10, Table S11, Table S12, Table S13, TableS14]
